# Supplementary material for: Determination of Major, Minor and Chiral Components as Quality and Authenticity Markers of Rosa damascena Oil by GC-FID
Source: MDPI journal article supplement (doi:10.3390/plants12030506), 2023-01-22

# Determination of Major, Minor and Chiral Components as Quality and Authenticity Markers of *Rosa damascena* Oil by GC-FID

Justine Raeber, Sina Favrod and Christian Steuer \*

Institute of Pharmaceutical Sciences, Swiss Federal Institute of Technology,  
8093 Zurich, Switzerland

\* Correspondence: christian.steuer@pharma.ethz.ch

Supplementary Materials

## Contents

|                       |    |
|-----------------------|----|
| Validation Data ..... | 2  |
| Matlab-Code .....     | 25 |
| MS-spectra .....      | 27 |

## Validation Data

Table S1: Resolution (Rs), recovery excess (RE) in % for authentic rose oil (RO) samples originating from Bulgaria (BG), Morocco (MA) and Turkey (TR) as well as lavender, rosemary, lemon and caraway oil. The RE is presented as the mean value with standard deviation. The number of repeated measurements are given with n. Samples were analysed on a DB-wax column.

| Analyte                    | Rs   | RE Authentic RO<br>[%]<br>(n=5) |                   | RE RO <sub>BG</sub><br>[%]<br>(n=3) | RE RO <sub>MA</sub><br>[%]<br>(n=3) | RE RO <sub>TR</sub><br>[%]<br>(n=3) | RE RO <sub>real</sub><br>[%]<br>(n=3) | RE Lavender<br>[%]<br>(n=2) | RE Rosemary<br>[%]<br>(n=2) | RE Lemon<br>[%]<br>(n=2) | RE Caraway<br>[%]<br>(n=2) |
|----------------------------|------|---------------------------------|-------------------|-------------------------------------|-------------------------------------|-------------------------------------|---------------------------------------|-----------------------------|-----------------------------|--------------------------|----------------------------|
|                            |      | QC <sub>high</sub>              | QC <sub>low</sub> |                                     |                                     |                                     |                                       |                             |                             |                          |                            |
| <b>α-pinene</b>            | 16.1 | 104,5 ± 9.8                     | 110,0 ± 3.2       | 94,6 ± 2.0                          | 99,5 ± 7.3                          | 87,8 ± 2.2                          | 92,5 ± 1.2                            | 99,0 ± 2.7                  | 111,3 ± 4.7                 | 98,6 ± 1.5               | 101,7 ± 3.1                |
| <b>Camphene</b>            | 12.3 | 107,1 ± 8.4                     | 107,3 ± 12.9      | 104,4 ± 4.4                         | 111,2 ± 3.3                         | 101,3 ± 3.5                         | 109,3 ± 4.5                           | 104,3 ± 2.3                 | 133,3 ± 9.4                 | 119,2 ± 4.8              | 110,9 ± 0.0                |
| <b>(-)-β-pinene</b>        | 22.7 | 107,2 ± 11.7                    | 119,9 ± 3.9       | 95,3 ± 3.0                          | 99,1 ± 9.5                          | 86,5 ± 3.5                          | 91,2 ± 3.0                            | 90,6 ± 7.5                  | 142,0 ± 14.6                | 133,3 ± 11.5             | 103,0 ± 3.5                |
| <b>α-terpinene</b>         | 6.0  | 106,5 ± 15.7                    | 88,3 ± 10.3       | 91,9 ± 1.7                          | 98,3 ± 9.2                          | 86,6 ± 3.1                          | 89,9 ± 2.6                            | 95,7 ± 1.6                  | 105,6 ± 4.5                 | 101,6 ± 1.7              | 105,0 ± 5.7                |
| <b>limonene</b>            | 28.3 | 104,7 ± 13.6                    | 84,2 ± 5.9        | 89,6 ± 1.7                          | 99,5 ± 10.7                         | 82,6 ± 4.0                          | 90,2 ± 1.5                            | 91,6 ± 2.3                  | 126,6 ± 13.0                | 259,3 ± 10.8             | 568,4 ± 131.2              |
| <b>p-cymene</b>            | 34.1 | 104,6 ± 12.9                    | 114,0 ± 6.1       | 94,3 ± 2.8                          | 98,1 ± 9.9                          | 90,2 ± 1.5                          | 88,1 ± 1.6                            | 104,4 ± 4.0                 | 116,2 ± 8.1                 | 97,6 ± 0.5               | 107,9 ± 5.3                |
| <b>(+/-)-rose oxide</b>    | 17.6 | 103,7 ± 16.7                    | 114,6 ± 5.6       | 90,7 ± 1.9                          | 85,7 ± 2.7                          | 80,0 ± 1.8                          | 84,2 ± 3.0                            | 96,0 ± 2.4                  | 101,9 ± 4.4                 | 92,7 ± 0.4               | 103,4 ± 5.5                |
| <b>cis-3-hexen-1-ol</b>    | 85.8 | NA                              | NA                | NA                                  | NA                                  | NA                                  | NA                                    | NA                          | NA                          | NA                       | NA                         |
| <b>linalool</b>            | 11.3 | 104,1 ± 16.8                    | 99,4 ± 8.6        | 85,9 ± 3.0                          | 94,1 ± 6.7                          | 83,2 ± 2.2                          | 84,8 ± 3.4                            | 93,8 ± 6.8                  | 104,5 ± 6.0                 | 93,0 ± 1.2               | 103,9 ± 5.5                |
| <b>β-caryophyllene</b>     | 16.8 | 95,5 ± 16.2                     | 97,2 ± 15.9       | 80,5 ± 1.2                          | 85,3 ± 7.5                          | 100,2 ± 2.0                         | 82,5 ± 6.9                            | 73,3 ± 2.1                  | 123,0 ± 26.2                | 85,5 ± 1.7               | 104,2 ± 5.1                |
| <b>β-damascenone</b>       | 6.3  | 94,6 ± 16.6                     | 103,5 ± 3.7       | 87,5 ± 7.8                          | 85,1 ± 5.7                          | 87,5 ± 1.7                          | 85,7 ± 4.6                            | 92,8 ± 0.8                  | 105,5 ± 14.2                | 99,2 ± 8.4               | 111,9 ± 6.6                |
| <b>citronellyl acetate</b> | 4.0  | 96,7 ± 13.6                     | 116,5 ± 14.5      | 81,9 ± 0.9                          | 92,2 ± 5.6                          | 82,8 ± 1.2                          | 83,6 ± 3.7                            | 95,9 ± 0.3                  | 110,2 ± 10.9                | 101,8 ± 8.9              | 111,8 ± 8.5                |
| <b>citral</b>              | 14.2 | 102,6 ± 16.5                    | 119,2 ± 9.3       | 86,1 ± 7.4                          | 85,1 ± 8.3                          | 87,7 ± 1.5                          | 83,1 ± 9.0                            | 91,2 ± 2.3                  | 108,6 ± 9.3                 | 112,7 ± 4.7              | 107,6 ± 7.4                |
| <b>neryl acetate</b>       | 8.5  | 93,2 ± 14.5                     | 115,5 ± 13.5      | 85,0 ± 1.8                          | 92,8 ± 8.0                          | 81,4 ± 0.5                          | 84,3 ± 6.7                            | 92,6 ± 0.1                  | 105,2 ± 7.7                 | 105,1 ± 0.6              | 750,9 ± 161.1              |
| <b>geranyl acetate</b>     | 4.8  | 106,9 ± 12.1                    | 103,2 ± 11.8      | 81,7 ± 2.7                          | 81,1 ± 4.5                          | 93,5 ± 1.8                          | 84,8 ± 8.6                            | 115,6 ± 0.8                 | 92,9 ± 3.4                  | 82,4 ± 8.8               | 90,6 ± 5.0                 |
| <b>citronellol</b>         | 10.6 | 110,2 ± 9.5                     | 82,6 ± 18.8       | 109,6 ± 3.6                         | 88,8 ± 5.5                          | 87,0 ± 2.6                          | 113,3 ± 10.2                          | 92,9 ± 0.8                  | 98,5 ± 6.4                  | 87,9 ± 0.0               | 101,9 ± 6.4                |
| <b>nerol</b>               | 2.4  | 93,9 ± 17.7                     | 104,3 ± 10.0      | 104,1 ± 3.2                         | 92,7 ± 4.9                          | 92,8 ± 1.6                          | 88,1 ± 6.5                            | 95,3 ± 0.4                  | 96,8 ± 6.3                  | 93,1 ± 6.7               | 100,2 ± 6.2                |
| <b>phenylethanol</b>       | 13.0 | 103,6 ± 17.4                    | 119,1 ± 9.3       | 101,4 ± 4.2                         | 98,6 ± 5.1                          | 85,0 ± 1.0                          | 95,5 ± 4.4                            | 105,5 ± 0.4                 | 109,7 ± 6.1                 | 101,2 ± 2.4              | 109,0 ± 5.2                |
| <b>geraniol</b>            | 44.0 | 93,9 ± 16.3                     | 110,7 ± 11.0      | 103,2 ± 3.2                         | 83,9 ± 4.8                          | 87,3 ± 1.4                          | 82,3 ± 7.1                            | 89,5 ± 1.2                  | 94,6 ± 6.7                  | 84,1 ± 0.1               | 98,5 ± 6.4                 |
| <b>methyleugenol</b>       | 38.6 | 91,8 ± 18.0                     | 90,8 ± 10.1       | 81,9 ± 1.8                          | 83,0 ± 5.5                          | 82,0 ± 2.9                          | 85,3 ± 11.4                           | 90,5 ± 0.4                  | 97,6 ± 7.3                  | 83,7 ± 1.0               | 104,5 ± 5.9                |
| <b>eugenol</b>             | 47.6 | 110,5 ± 11.1                    | 100,8 ± 14.7      | 104,7 ± 1.3                         | 92,4 ± 3.2                          | 96,7 ± 1.1                          | 99,9 ± 4.5                            | 95,4 ± 0.6                  | 107,9 ± 14.2                | 93,9 ± 0.7               | 115,1 ± 8.8                |
| <b>farnesol</b>            | 0    | 87,5 ± 30.1                     | 96,0 ± 17.8       | 97,6 ± 4.7                          | 89,5 ± 15.7                         | 116,3 ± 15.7                        | 88,1 ± 9.8                            | 99,1 ± 2.8                  | 110,9 ± 12.2                | 101,6 ± 7.1              | 125,3 ± 10.9               |

Table S2: Resolution (Rs), recovery excess (RE) in % for authentic rose oil (RO) samples originating from Bulgaria (BG), Morocco (MA) and Turkey (TR) as well as lavender, rosemary, lemon and caraway oil. The RE is presented as the mean value with standard deviation. The number of repeated measurements are given with n. Samples were analysed on a chiral column.

| Analyte               | Rs   | RE Authentic RO<br>[%]<br>(n=5) |                   | RE RO <sub>BG</sub><br>[%]<br>(n=3) | RE RO <sub>MA</sub><br>[%]<br>(n=3) | RE RO <sub>TR</sub><br>[%]<br>(n=3) | RE RO <sub>real</sub><br>[%]<br>(n=3) | RE Lavender<br>[%]<br>(n=3) | RE Rosemary<br>[%]<br>(n=3) | RE Lemon<br>[%]<br>(n=3) | RE Caraway<br>[%]<br>(n=3) |
|-----------------------|------|---------------------------------|-------------------|-------------------------------------|-------------------------------------|-------------------------------------|---------------------------------------|-----------------------------|-----------------------------|--------------------------|----------------------------|
|                       |      | QC <sub>high</sub>              | QC <sub>low</sub> |                                     |                                     |                                     |                                       |                             |                             |                          |                            |
| (+)- $\alpha$ -pinene | 2.4  | 91,2 $\pm$ 0.9                  | 88,0 $\pm$ 0.8    | 87,7 $\pm$ 0.2                      | 92,2 $\pm$ 0.8                      | 89,3 $\pm$ 0.5                      | 92,4 $\pm$ 4.1                        | 94,4 $\pm$ 8.4              | 96,5 $\pm$ 3.3              | 90,7 $\pm$ 0.9           | 87,8 $\pm$ 2.9             |
| (+/-)-camphene        | 5.9  | 100,2 $\pm$ 1.6                 | 118,3 $\pm$ 3.2   | 104,7 $\pm$ 1.4                     | 109,2 $\pm$ 1.5                     | 104,3 $\pm$ 2.2                     | 111,6 $\pm$ 1.3                       | 116,0 $\pm$ 6.5             | 116,3 $\pm$ 5.8             | 117,3 $\pm$ 4.8          | 100,4 $\pm$ 1.9            |
| (+/-)-camphene        | 12.0 | 91,7 $\pm$ 6.3                  | 107,3 $\pm$ 3.5   | 92,0 $\pm$ 4.3                      | 98,0 $\pm$ 1.0                      | 91,9 $\pm$ 1.5                      | 95,3 $\pm$ 4.3                        | 104,6 $\pm$ 12.4            | 98,7 $\pm$ 12.4             | 94,3 $\pm$ 4.5           | 87,1 $\pm$ 5.5             |
| (-)- $\beta$ -pinene  | 28.6 | 91,1 $\pm$ 1.8                  | 105,3 $\pm$ 10.5  | 91,6 $\pm$ 1.1                      | 96,6 $\pm$ 0.8                      | 93,4 $\pm$ 0.4                      | 95,6 $\pm$ 4.7                        | 100,3 $\pm$ 9.6             | 105,4 $\pm$ 11.4            | 83,5 $\pm$ 18.0          | 89,0 $\pm$ 3.3             |
| cis-3-hexen-1-ol      | 8.3  | NA                              | NA                | NA                                  | NA                                  | NA                                  | NA                                    | NA                          | NA                          | NA                       | NA                         |
| $\alpha$ -terpinene   | 7.9  | 91,9 $\pm$ 1.5                  | 100,8 $\pm$ 2.6   | 91,9 $\pm$ 4.2                      | 92,5 $\pm$ 4.6                      | 89,6 $\pm$ 1.5                      | 94,8 $\pm$ 3.0                        | 93,9 $\pm$ 6.2              | 99,2 $\pm$ 12.8             | 95,6 $\pm$ 7.7           | 90,8 $\pm$ 3.4             |
| limonene              | 1.2  | 99,7 $\pm$ 4.8                  | 119,8 $\pm$ 2.9   | 88,5 $\pm$ 1.9                      | 101,5 $\pm$ 7.5                     | 91,1 $\pm$ 2.4                      | 97,2 $\pm$ 4.9                        | 98,1 $\pm$ 4.6              | 108,2 $\pm$ 24.3            | 54,6 $\pm$ 101.9         | 229,5 $\pm$ 102.2          |
| p-cymene              | 30.6 | 97,2 $\pm$ 3.9                  | 116,1 $\pm$ 1.9   | 89,8 $\pm$ 1.3                      | 89,7 $\pm$ 3.0                      | 90,6 $\pm$ 0.9                      | 88,8 $\pm$ 1.8                        | 86,1 $\pm$ 18.8             | 87,7 $\pm$ 13.3             | 36,7 $\pm$ 7.4           | 252,1 $\pm$ 420.3          |
| (+)-rose oxide        | 1.5  | 96,4 $\pm$ 2.0                  | 106,5 $\pm$ 5.9   | 88,7 $\pm$ 0.7                      | 96,7 $\pm$ 1.4                      | 91,5 $\pm$ 0.1                      | 96,6 $\pm$ 4.7                        | 93,6 $\pm$ 6.2              | 103,0 $\pm$ 3.1             | 92,0 $\pm$ 4.0           | 107,7 $\pm$ 6.0            |
| (-)-rose oxide        | 27.1 | 98,7 $\pm$ 1.6                  | 112,6 $\pm$ 5.1   | 91,4 $\pm$ 1.2                      | 96,5 $\pm$ 2.1                      | 93,6 $\pm$ 0.3                      | 97,4 $\pm$ 3.7                        | 93,6 $\pm$ 1.8              | 96,9 $\pm$ 1.8              | 94,1 $\pm$ 4.3           | 95,5 $\pm$ 3.6             |
| (+/-)-linalool        | 6.7  | 95,1 $\pm$ 1.5                  | 87,5 $\pm$ 3.9    | 86,5 $\pm$ 1.5                      | 91,3 $\pm$ 1.2                      | 88,4 $\pm$ 1.7                      | 93,7 $\pm$ 7.5                        | 128,5 $\pm$ 88.5            | 97,4 $\pm$ 2.6              | 94,4 $\pm$ 3.1           | 89,9 $\pm$ 3.7             |
| (+/-)-linalool        | 58.4 | 95,3 $\pm$ 1.3                  | 110,4 $\pm$ 3.1   | 86,6 $\pm$ 1.4                      | 92,3 $\pm$ 0.8                      | 89,1 $\pm$ 1.4                      | 94,8 $\pm$ 6.7                        | 90,4 $\pm$ 3.8              | 94,7 $\pm$ 1.7              | 89,0 $\pm$ 1.7           | 94,7 $\pm$ 4.2             |
| phenylethanol         | 6.7  | 91,7 $\pm$ 1.8                  | 92,0 $\pm$ 1.5    | 88,8 $\pm$ 0.8                      | 89,9 $\pm$ 3.1                      | 87,9 $\pm$ 3.1                      | 92,2 $\pm$ 4.0                        | 82,8 $\pm$ 3.4              | 90,5 $\pm$ 0.6              | 91,1 $\pm$ 2.6           | 85,5 $\pm$ 3.6             |
| cis/trans-citral      | 9.0  | 107,8 $\pm$ 2.3                 | 117,7 $\pm$ 7.1   | 93,0 $\pm$ 2.8                      | 98,4 $\pm$ 6.1                      | 86,2 $\pm$ 5.8                      | 96,3 $\pm$ 8.7                        | 81,0 $\pm$ 2.2              | 91,3 $\pm$ 5.0              | 89,5 $\pm$ 7.2           | 104,0 $\pm$ 13.7           |
| (+/-)-citronellol     | 0.9  | 103,7 $\pm$ 3.7                 | 107,4 $\pm$ 2.6   | 106,1 $\pm$ 5.3                     | 117,6 $\pm$ 10.7                    | 106,5 $\pm$ 7.4                     | 95,9 $\pm$ 10.6                       | 103,8 $\pm$ 3.6             | 97,6 $\pm$ 3.4              | 100,2 $\pm$ 3.2          | 99,5 $\pm$ 5.8             |
| (+/-)-citronellol     | 2.2  | 103,0 $\pm$ 2.7                 | 118,6 $\pm$ 13.0  | 90,5 $\pm$ 4.9                      | 104,6 $\pm$ 9.4                     | 99,1 $\pm$ 9.1                      | 84,8 $\pm$ 9.1                        | 101,1 $\pm$ 4.3             | 103,5 $\pm$ 2.9             | 99,5 $\pm$ 2.4           | 95,3 $\pm$ 3.2             |
| nerol                 | 7.7  | 94,5 $\pm$ 1.5                  | 103,0 $\pm$ 5.3   | 89,9 $\pm$ 2.2                      | 94,2 $\pm$ 4.4                      | 101,0 $\pm$ 2.5                     | 98,7 $\pm$ 12.8                       | 92,5 $\pm$ 3.2              | 96,9 $\pm$ 2.2              | 94,3 $\pm$ 2.8           | 111,3 $\pm$ 35.4           |

|                                  |      |              |              |             |              |             |              |              |             |              |              |
|----------------------------------|------|--------------|--------------|-------------|--------------|-------------|--------------|--------------|-------------|--------------|--------------|
| <b>cis/trans-citral</b>          | 7.3  | 103,2 ± 3.2  | 117,0 ± 2.2  | 99,7 ± 3.7  | 104,8 ± 7.9  | 97,7 ± 3.7  | 104,2 ± 8.2  | 98,5 ± 8.1   | 96,8 ± 3.8  | 95,4 ± 8.5   | 96,1 ± 8.0   |
| <b>geraniol</b>                  | 5.9  | 94,5 ± 1.5   | 112,2 ± 4.7  | 87,5 ± 3.4  | 93,9 ± 1.6   | 98,3 ± 1.4  | 99,1 ± 9.6   | 92,4 ± 4.1   | 92,6 ± 2.1  | 90,2 ± 2.7   | 88,4 ± 4.3   |
| <b>(+/-)-citronellyl acetate</b> | 0.8  | 107,0 ± 5.7  | 110,8 ± 4.7  | 89,0 ± 3.7  | 110,7 ± 11.0 | 85,4 ± 4.4  | 88,6 ± 17.8  | 103,7 ± 8.9  | 103,2 ± 3.9 | 98,8 ± 4.6   | 116,4 ± 19.8 |
| <b>(+/-)-citronellyl acetate</b> | 4.1  | 109,0 ± 2.5  | 117,6 ± 3.0  | 91,6 ± 2.3  | 101,9 ± 8.9  | 94,5 ± 4.2  | 100,7 ± 8.5  | 89,6 ± 9.3   | 107,4 ± 3.5 | 97,9 ± 13.6  | 89,8 ± 11.5  |
| <b>neryl acetate</b>             | 6.5  | 95,3 ± 2.0   | 108,2 ± 1.5  | 92,4 ± 3.1  | 97,4 ± 1.7   | 89,7 ± 2.6  | 90,8 ± 11.1  | 92,8 ± 9.6   | 94,0 ± 1.7  | 92,9 ± 3.7   | 88,5 ± 6.5   |
| <b>(cis/trans)-β-damascenone</b> | 8.4  | 97,6 ± 2.2   | 86,3 ± 0.0   | 99,4 ± 3.2  | 105,7 ± 11.5 | 85,0 ± 6.9  | 94,8 ± 11.7  | 86,7 ± 6.0   | 100,4 ± 9.0 | 89,2 ± 12.2  | 85,6 ± 0.6   |
| <b>geranyl acetate</b>           | 0.7  | 93,3 ± 8.7   | 109,6 ± 4.7  | 81,7 ± 3.9  | 80,2 ± 1.4   | 81,2 ± 3.2  | 87,6 ± 10.6  | 91,2 ± 4.0   | 84,8 ± 3.1  | 103,1 ± 18.4 | 103,7 ± 2.3  |
| <b>β-caryophyllene</b>           | 1.9  | 101,0 ± 11.8 | 110,3 ± 3.3  | 93,5 ± 0.6  | 92,4 ± 3.6   | 88,4 ± 2.7  | 93,6 ± 3.3   | 95,0 ± 9.1   | 109,5 ± 9.9 | 113,9 ± 15.2 | 99,1 ± 1.8   |
| <b>(cis/trans)-β-damascenone</b> | 4.0  | 96,9 ± 3.0   | 119,4 ± 3.5  | 91,7 ± 4.4  | 92,1 ± 5.2   | 89,8 ± 5.1  | 86,7 ± 6.7   | 90,7 ± 5.8   | 90,4 ± 2.3  | 93,2 ± 10.2  | 88,6 ± 10.2  |
| <b>β-damascone</b>               | 7.6  | 95,9 ± 2.3   | 96,9 ± 3.0   | 93,5 ± 3.3  | 97,9 ± 1.4   | 92,6 ± 2.8  | 93,1 ± 4.7   | 92,7 ± 4.0   | 94,1 ± 2.3  | 94,4 ± 4.2   | 90,5 ± 3.4   |
| <b>eugenol</b>                   | 11.6 | 97,3 ± 2.3   | 85,5 ± 13.2  | 91,5 ± 4.8  | 95,9 ± 1.7   | 102,8 ± 2.7 | 108,9 ± 9.6  | 91,9 ± 3.6   | 96,9 ± 2.7  | 94,5 ± 4.2   | 91,2 ± 3.3   |
| <b>methyleugenol</b>             | 76.1 | 95,2 ± 1.8   | 83,8 ± 12.6  | 91,0 ± 4.1  | 98,4 ± 1.1   | 101,6 ± 3.7 | 102,7 ± 9.9  | 94,7 ± 3.3   | 99,3 ± 2.5  | 96,1 ± 4.4   | 93,4 ± 4.0   |
| <b>farnesol</b>                  | 0    | 95,8 ± 1.6   | 108,1 ± 10.1 | 97,4 ± 20.8 | 120,0 ± 4.9  | 113,9 ± 8.5 | 118,3 ± 19.8 | 102,8 ± 17.8 | 117,6 ± 7.1 | 114,5 ± 6.2  | 114,7 ± 4.9  |

Table S3: Results for robustness testing on the DB-wax column.

|                    | Analyte        | $\alpha$ -pinene | Camphene | (-)- $\beta$ -pinene | $\alpha$ -terpinene | limonene | p-cymene | (+/-)-rose oxide | cis-3-hexen-1-ol | linalool | $\beta$ -caryophyllene | $\beta$ -damascenone |
|--------------------|----------------|------------------|----------|----------------------|---------------------|----------|----------|------------------|------------------|----------|------------------------|----------------------|
| Standard method    | RT [min]       | 4.25             | 5.36     | 6.84                 | 10.98               | 12.43    | 18.28    | 22.52            | 24.03            | 29.00    | 29.83                  | 31.17                |
|                    | R <sub>s</sub> | 16.1             | 12.3     | 22.7                 | 6.0                 | 28.3     | 34.1     | 17.6             | 85.8             | 11.3     | 16.8                   | 6.3                  |
| FID temp. 275 °C   | Fold change    | 1,02             | 1,03     | 1,01                 | 1,03                | 1,01     | 1,01     | 1,04             | 1,00             | 1,04     | 1,04                   | 1,18                 |
| FID temp. 225 °C   | Fold change    | 0,95             | 0,96     | 0,95                 | 0,94                | 0,96     | 0,93     | 0,92             | 1,00             | 0,92     | 0,88                   | 0,87                 |
| Inlet temp. 240 °C | Fold change    | 1,05             | 1,05     | 1,06                 | 1,06                | 1,07     | 1,05     | 1,06             | 1,00             | 1,07     | 1,09                   | 1,08                 |
| Inlet temp. 220 °C | Fold change    | 0,94             | 0,96     | 0,93                 | 0,93                | 0,93     | 0,92     | 0,91             | 1,00             | 0,92     | 0,89                   | 0,88                 |

|                             |                |      |      |      |       |       |       |       |       |       |       |       |
|-----------------------------|----------------|------|------|------|-------|-------|-------|-------|-------|-------|-------|-------|
| Split ratio 1:100           | Fold change    | 1,07 | 1,06 | 1,08 | 1,07  | 1,09  | 1,08  | 1,11  | 1,00  | 1,10  | 1,13  | 1,10  |
|                             |                |      |      |      |       |       |       |       |       |       |       |       |
| Split ratio 1:25            | Fold change    | 1,10 | 1,11 | 1,10 | 1,18  | 1,14  | 1,12  | 1,14  | 1,00  | 1,13  | 1,16  | 1,15  |
|                             |                |      |      |      |       |       |       |       |       |       |       |       |
| Flow 2.5 ml/min             | RT [min]       | 3.67 | 4.65 | 5.90 | 9.43  | 10.67 | 16.78 | 21.54 | 23.20 | 28.27 | 28.99 | 30.45 |
|                             | R <sub>s</sub> | 12.2 | 12.9 | 27.2 | 7.2   | 35.3  | 35.1  | 17.5  | 68.8  | 8.4   | 14.4  | 5.0   |
| Flow 1.5 ml/min             | RT [min]       | 5.16 | 6.54 | 8.31 | 13.31 | 15.07 | 19.93 | 23.74 | 25.12 | 29.93 | 30.86 | 32.11 |
|                             | R <sub>s</sub> | 11.6 | 13.1 | 34.7 | 8.7   | 27.3  | 35.7  | 18.4  | 73.2  | 11.8  | 15.4  | 6.5   |
| Temperature ramp 7.5 °C/min | RT [min]       | 4.24 | 5.37 | 6.82 | 10.91 | 12.35 | 17.82 | 21.04 | 22.12 | 25.56 | 26.26 | 27.09 |
|                             | R <sub>s</sub> | 12.3 | 11.9 | 22.3 | 6.7   | 33.4  | 35.3  | 14.8  | 70.0  | 14.2  | 16.9  | 7.1   |
| Temperature ramp 2.5 °C/min | RT [min]       | 4.24 | 5.37 | 6.82 | 10.92 | 12.36 | 18.87 | 25.39 | 28.13 | 37.31 | 38.24 | 41.33 |
|                             | R <sub>s</sub> | 13.3 | 12.2 | 26.9 | 7.7   | 48.0  | 27.1  | 15.2  | 70.3  | 8.4   | 23.7  | 7.4   |

|                       | Analyte        | citronellyl<br>acetate | citral | neryl<br>acetate | geranyl<br>acetate | citronellol | nerol | phenylethanol | geraniol | methyleugenol | eugenol | farnesol |
|-----------------------|----------------|------------------------|--------|------------------|--------------------|-------------|-------|---------------|----------|---------------|---------|----------|
| Standard method       | RT<br>[min]    | 31.70                  | 32.00  | 33.17            | 33.86              | 34.17       | 34.87 | 35.00         | 35.89    | 39.10         | 41.92   | 45.38    |
|                       | R <sub>s</sub> | 4.0                    | 14.2   | 8.5              | 4.8                | 10.6        | 2.4   | 13.0          | 44.0     | 38.6          | 47.6    | NA       |
| FID temp. 275 °C      | Fold<br>change | 1,08                   | 1,10   | 1,06             | 1,04               | 1,05        | 1,05  | 1,05          | 1,05     | 1,04          | 1,20    | 1,06     |
| FID temp. 225 °C      | Fold<br>change | 0,88                   | 0,89   | 0,89             | 0,88               | 0,90        | 0,92  | 0,91          | 0,91     | 0,89          | 0,84    | 0,85     |
| Inlet temp. 240<br>°C | Fold<br>change | 1,02                   | 1,08   | 1,07             | 1,07               | 1,10        | 1,09  | 1,10          | 1,08     | 1,04          | 1,06    | 1,02     |
| Inlet temp.<br>220 °C | Fold<br>change | 0,95                   | 0,89   | 0,87             | 0,88               | 0,92        | 0,94  | 0,90          | 0,88     | 0,85          | 0,88    | 0,95     |

|                             |                |       |       |       |       |       |       |       |       |       |       |       |
|-----------------------------|----------------|-------|-------|-------|-------|-------|-------|-------|-------|-------|-------|-------|
| Split ratio 1:100           | Fold change    | 1,07  | 0,94  | 1,11  | 1,07  | 1,17  | 1,16  | 1,17  | 1,13  | 1,13  | 1,19  | 1,14  |
| Split ratio 1:1:25          | Fold change    | 1,13  | 1,20  | 1,14  | 1,14  | 1,13  | 1,17  | 1,17  | 1,14  | 1,16  | 1,10  | 1,16  |
| Flow 2.5 ml/min             | RT [min]       | 30.96 | 31.25 | 32.44 | 33.13 | 33.47 | 34.16 | 34.30 | 35.19 | 38.37 | 41.17 | 44.65 |
|                             | R <sub>s</sub> | 2.9   | 11.7  | 6.8   | 4.5   | 10.9  | 1.6   | 10.0  | 37.0  | 28.5  | 43.2  | NA    |
| Flow 1.5 ml/min             | RT [min]       | 32.64 | 33.00 | 34.11 | 34.79 | 35.08 | 35.80 | 35.99 | 36.81 | 40.04 | 42.88 | 46.31 |
|                             | R <sub>s</sub> | 4.4   | 13.6  | 8.4   | 4.1   | 11.8  | 2.7   | 10.8  | 42.3  | 37.2  | 45.0  | NA    |
| Temperature ramp 7.5 °C/min | RT [min]       | 27.44 | 27.72 | 28.45 | 28.91 | 29.10 | 29.60 | 29.74 | 30.77 | 32.47 | 34.41 | 36.68 |
|                             | R <sub>s</sub> | 5.7   | 11.0  | 7.0   | 3.4   | 11.3  | 2.5   | 9.6   | 44.8  | 39.5  | 46.2  | NA    |
| Temperature ramp 2.5 °C/min | RT [min]       | 42.29 | 42.75 | 45.11 | 46.47 | 47.22 | 48.47 | 48.67 | 50.54 | 56.63 | 62.00 | 69.07 |



|  |       |     |      |     |     |     |     |      |      |      |      |    |
|--|-------|-----|------|-----|-----|-----|-----|------|------|------|------|----|
|  | $R_s$ | 3.5 | 16.6 | 9.6 | 5.3 | 8.8 | 1.4 | 13.1 | 64.2 | 37.7 | 54.5 | NA |
|--|-------|-----|------|-----|-----|-----|-----|------|------|------|------|----|

Table S4: Results for robustness testing on the chiral column.

|                       | Analyte        | $\alpha$ -pinene | camphene | camphene | (-)- $\beta$ -pinene | cis-3-hexen-1-ol | $\alpha$ -terpinene | limonene | p-cymene | (+)-rose oxide | (-)-rose oxide | linalool | linalool | phenylethanol | cis/trans-citral | citronellol |
|-----------------------|----------------|------------------|----------|----------|----------------------|------------------|---------------------|----------|----------|----------------|----------------|----------|----------|---------------|------------------|-------------|
| Standard method       | RT [min]       | 9.58             | 9.77     | 10.27    | 11.49                | 15.21            | 16.26               | 17.06    | 17.16    | 20.28          | 20.43          | 23.18    | 23.87    | 29.82         | 30.66            | 31.95       |
|                       | R <sub>s</sub> | 2.4              | 5.9      | 12.0     | 28.6                 | 8.3              | 7.9                 | 1.2      | 30.6     | 1.5            | 27.1           | 6.7      | 58.4     | 6.7           | 9.0              | 0.9         |
| FID temp 280 °C       | Fold change    | 1,06             | 1,10     | 1,07     | 1,07                 | 1,00             | 1,07                | 1,09     | 1,05     | 1,10           | 1,10           | 1,14     | 1,13     | 1,09          | 1,13             | 1,07        |
| FID temp 240 °C       | Fold change    | 1,03             | 1,02     | 1,05     | 1,04                 | 1,00             | 1,04                | 1,07     | 0,98     | 1,09           | 1,07           | 1,08     | 1,07     | 1,04          | 1,06             | 1,08        |
| Inlet temp. 260 °C    | Fold change    | 1,02             | 1,07     | 1,02     | 1,02                 | 1,00             | 1,04                | 1,02     | 1,07     | 1,06           | 1,07           | 1,05     | 1,05     | 1,03          | 1,05             | 0,99        |
| Inlet temp 220 °C     | Fold change    | 0,94             | 0,93     | 0,94     | 0,92                 | 1,00             | 0,86                | 0,91     | 0,93     | 0,91           | 0,89           | 0,95     | 0,95     | 0,92          | 0,91             | 0,91        |
| Split flow 200 ml/min | Fold change    | 1,07             | 1,08     | 1,07     | 1,08                 | 1,00             | 1,09                | 1,09     | 1,10     | 1,14           | 1,14           | 1,14     | 1,14     | 1,09          | 1,17             | 1,09        |
| Split flow 80 ml/min  | Fold change    | 0,98             | 1,00     | 0,98     | 0,98                 | 1,00             | 0,95                | 1,00     | 0,94     | 0,98           | 0,97           | 1,01     | 1,01     | 0,99          | 1,00             | 1,01        |
| Constant flow 120 kPa | RT [min]       | 8.51             | 8.67     | 9.17     | 10.29                | 13.99            | 14.90               | 15.67    | 15.75    | 18.74          | 18.89          | 21.71    | 22.41    | 28.35         | 28.99            | 30.35       |

|                                |                |             |       |                      |          |                     |                        |                  |                                       |                            |                         |                                       |                     |         |                   |          |
|--------------------------------|----------------|-------------|-------|----------------------|----------|---------------------|------------------------|------------------|---------------------------------------|----------------------------|-------------------------|---------------------------------------|---------------------|---------|-------------------|----------|
|                                | R <sub>s</sub> | 1.4         | 4.5   | 10.0                 | 27.1     | 6.7                 | 5.6                    | 0.6              | 24.0                                  | 1.4                        | 22.6                    | 5.6                                   | 43.8                | 41.6    | 11.8              | 0.9      |
| Flow const. Pressure<br>80 kPa | RT<br>[min]    | 11.05       | 11.30 | 11.83                | 13.13    | 16.82               | 18.09                  | 18.89            | 19.02                                 | 22.28                      | 22.43                   | 25.07                                 | 25.74               | 31.67   | 32.79             | 33.98    |
|                                | R <sub>s</sub> | 2.3         | 4.8   | 11.8                 | 30.03    | 8.6                 | 6.5                    | 1.3              | 26.7                                  | 1.2                        | 19.5                    | 4.9                                   | 43.7                | 8.3     | 8.8               | 0.7      |
| Temperature ramp<br>4 °C/min   | RT<br>[min]    | 8.09        | 8.28  | 8.59                 | 9.38     | 11.20               | 12.12                  | 12.57            | 12.66                                 | 14.49                      | 14.57                   | 15.78                                 | 16.09               | 19.04   | 19.19             | 20.40    |
|                                | R <sub>s</sub> | 2.6         | 4.2   | 10.7                 | 19.2     | 9.7                 | 5.5                    | 1.1              | 27.7                                  | 1.2                        | 17.8                    | 4.6                                   | 45.8                | 1.6     | 10.6              | 0.7      |
| Temperature ramp<br>1 °C/min   | RT<br>[min]    | 10.90       | 11.06 | 11.81                | 13.51    | 20.12               | 21.17                  | 22.52            | 22.52                                 | 27.66                      | 27.92                   | 33.71                                 | 35.16               | 46.87   | 49.46             | 50.26    |
|                                | R <sub>s</sub> | 1.3         | 6.1   | 11.9                 | 31.5     | 5.0                 | 7.1                    | 24.1             | 24.1                                  | 1.4                        | 30.5                    | 6.4                                   | 51.6                | 12.7    | 4.4               | 1.2      |
|                                | Analyte        | citronellol | nerol | cis/trans-<br>citral | geraniol | citronellyl acetate | citronellyl<br>acetate | neryl<br>acetate | (cis/trans)-<br>β-<br>damasceno<br>ne | geran<br>yl<br>acetat<br>e | β-<br>caryophyll<br>ene | (cis/trans)-<br>β-<br>damascen<br>one | β-<br>damascon<br>e | eugenol | methyleug<br>enol | farnesol |
| Standard method                | RT<br>[min]    | 32.06       | 32.35 | 33.26                | 34.30    | 35.16               | 35.27                  | 35.87            | 36.70                                 | 37.78                      | 37.87                   | 38.11                                 | 38.64               | 39.61   | 41.11             | 58.67    |
|                                | R <sub>s</sub> | 2.2         | 7.7   | 7.3                  | 5.9      | 0.8                 | 4.1                    | 6.5              | 8.4                                   | 0.7                        | 1.9                     | 4.0                                   | 7.6                 | 11.6    | 76.1              | -        |
| FID temp<br>280 °C             | RT<br>[min]    | 32.06       | 32.35 | 33.26                | 34.30    | 35.16               | 35.27                  | 35.87            | 36.70                                 | 37.78                      | 37.87                   | 38.11                                 | 38.64               | 39.61   | 41.11             | 58.67    |
|                                | Fold<br>change | 1,02        | 1,11  | 1,11                 | 1,13     | 1,16                | 1,12                   | 1,13             | 1,13                                  | 1,05                       | 1,03                    | 1,16                                  | 1,14                | 1,14    | 1,12              | 1,15     |
| FID temp<br>240 °C             | RT<br>[min]    | 32.06       | 32.35 | 33.26                | 34.30    | 35.16               | 35.27                  | 35.87            | 36.70                                 | 37.78                      | 37.87                   | 38.11                                 | 38.64               | 39.61   | 41.11             | 58.67    |

|                          |                |       |       |       |       |       |       |       |       |       |       |       |       |       |       |       |
|--------------------------|----------------|-------|-------|-------|-------|-------|-------|-------|-------|-------|-------|-------|-------|-------|-------|-------|
|                          | Fold change    | 1,04  | 1,06  | 1,06  | 1,07  | 1,14  | 1,09  | 1,07  | 1,09  | 1,01  | 0,96  | 1,10  | 1,09  | 1,15  | 1,12  | 1,08  |
| Inlet temp<br>- 260 °C   | RT [min]       | 32.06 | 32.35 | 33.26 | 34.30 | 35.16 | 35.27 | 35.87 | 36.70 | 37.78 | 37.87 | 38.11 | 38.64 | 39.61 | 41.11 | 58.67 |
|                          | Fold change    | 0,97  | 1,05  | 1,04  | 1,05  | 1,19  | 1,20  | 1,05  | 1,09  | 0,98  | 1,01  | 1,06  | 1,03  | 1,08  | 1,08  | 1,04  |
| Inlet Temp<br>- 220 °C   | RT [min]       | 32.06 | 32.35 | 33.26 | 34.30 | 35.16 | 35.27 | 35.87 | 36.70 | 37.78 | 37.87 | 38.11 | 38.64 | 39.61 | 41.11 | 58.67 |
|                          | Fold change    | 0,89  | 0,91  | 0,90  | 0,90  | 0,94  | 0,91  | 0,89  | 0,89  | 0,89  | 0,87  | 0,91  | 0,88  | 0,89  | 0,90  | 0,84  |
| Spilt flow<br>200 ml/min | Fold change    | 1,05  | 1,13  | 1,13  | 1,16  | 1,29  | 1,28  | 1,13  | 1,14  | 1,17  | 1,18  | 1,17  | 1,16  | 1,19  | 1,17  | 1,31  |
| Spilt flow<br>80 ml/min  | Fold change    | 1,00  | 0,92  | 0,98  | 1,01  | 1,06  | 1,03  | 0,97  | 0,96  | 1,04  | 1,03  | 1,00  | 0,98  | 1,03  | 1,00  | 0,99  |
| Constant flow<br>120 kPa | RT [min]       | 30.47 | 30.75 | 31.55 | 32.69 | 33.38 | 33.51 | 34.06 | 34.76 | 35.97 | 35.97 | 36.35 | 36.70 | 37.79 | 39.28 | 56.67 |
|                          | R <sub>s</sub> | 1.9   | 6.2   | 7.7   | 4.8   | 1.0   | 4.3   | 5.4   | 7.3   | 2.4   | NA    | 2.3   | 7.5   | 11.2  | 123.6 | NA    |
| Flow const.<br>Pressure  | RT [min]       | 34.07 | 34.36 | 35.41 | 36.34 | 37.40 | 37.50 | 38.15 | 39.16 | 40.05 | 40.34 | 40.34 | 41.10 | 41.93 | 43.45 | 61.16 |

|                           |                |       |       |       |       |       |       |       |       |       |       |       |       |       |       |        |
|---------------------------|----------------|-------|-------|-------|-------|-------|-------|-------|-------|-------|-------|-------|-------|-------|-------|--------|
|                           | R <sub>s</sub> | 2.1   | 7.4   | 6.5   | 7.4   | 0.7   | 4.6   | 7.1   | 6.3   | 1.9   | 5.0   | NA    | 5.4   | 10.0  | 130.6 | NA     |
| Temperature ramp 4 °C/min | RT [min]       | 20.45 | 20.6  | 21.27 | 21.61 | 22.38 | 22.38 | 22.82 | 23.53 | 23.76 | 23.85 | 24.14 | 24.50 | 24.75 | 25.54 | 34.12  |
|                           | R <sub>s</sub> | 2.0   | 8.2   | 4.2   | 7.6   | 3.6   | 3.6   | 6.3   | 2.5   | 1.1   | 3.6   | 4.4   | 2.7   | 9.3   | 68.9  | NA     |
| Temperature ramp 1 °C/min | RT [min]       | 50.52 | 51.08 | 52.03 | 54.83 | 55.23 | 55.54 | 56.36 | 57.08 | 59.49 | 60.26 | 60.92 | 61.17 | 63.68 | 66.56 | 100.56 |
|                           | R <sub>s</sub> | 2.3   | 3.9   | 11.5  | 1.6   | 1.3   | 3.4   | 3.1   | 10.3  | 3.3   | 2.8   | 1.1   | 9.0   | 11.4  | 120.1 | NA     |

Table S5: concentration determination of 10 authentic rose oils after analysis on a DB-wax column. Bold numbers are concentrations slightly out of the calibration range.

| Species                | <i>R.</i><br><i>damascena</i>      | <i>P.</i><br><i>graveolens</i> | <i>P.</i><br><i>graveolens</i>    | <i>R.</i><br><i>damascena</i> | <i>R.</i><br><i>damascena</i>     | <i>R.</i><br><i>damascena</i> | <i>R.</i><br><i>damascena</i>      | <i>R.</i><br><i>damascena</i> | <i>R.</i><br><i>damascena</i> | <i>R.</i><br><i>damascena</i> |
|------------------------|------------------------------------|--------------------------------|-----------------------------------|-------------------------------|-----------------------------------|-------------------------------|------------------------------------|-------------------------------|-------------------------------|-------------------------------|
| Quality                | pure                               | pure                           | pure                              | 10%                           | pure                              | pure                          | pure                               | pure                          | pure                          | 10%                           |
| Origin                 | Bulgaria                           | NA                             | NA                                | Morocco                       | Turkey                            | Bulgaria                      | Bulgaria                           | Turkey                        | Turkey                        | Bulgaria                      |
| analyte                | conc [mg/ml]                       | conc [mg/ml]                   | conc [mg/ml]                      | conc [mg/ml]                  | conc [mg/ml]                      | conc [mg/ml]                  | conc [mg/ml]                       | conc [mg/ml]                  | conc [mg/ml]                  | conc [mg/ml]                  |
| $\alpha$ -pinene       | 1.62 $\pm$ 0.00                    | 1.99 $\pm$ 0.02                | 3.24 $\pm$ 0.02                   | 0.51 $\pm$ 0.01               | 5.11 $\pm$ 0.01                   | 6.24 $\pm$ 0.04               | 2.94 $\pm$ 0.01                    | 3.60 $\pm$ 0.02               | 14.24 $\pm$ 0.05              | 0.58 $\pm$ 0.03               |
| camphene               | 0.03 $\pm$ 0.00                    | 0.04 $\pm$ 0.00                | 0.05 $\pm$ 0.00                   | n.d.                          | 0.04 $\pm$ 0.00                   | 0.05 $\pm$ 0.00               | 0.04 $\pm$ 0.00                    | 0.04 $\pm$ 0.00               | 0.05 $\pm$ 0.00               | 0.03 $\pm$ 0.00               |
| $\beta$ -pinene        | 0.41 $\pm$ 0.00                    | 0.04 $\pm$ 0.00                | 0.06 $\pm$ 0.00                   | 0.16 $\pm$ 0.00               | 2.05 $\pm$ 0.08                   | 2.19 $\pm$ 0.01               | 0.70 $\pm$ 0.00                    | 1.45 $\pm$ 0.03               | 2.78 $\pm$ 0.08               | 0.16 $\pm$ 0.01               |
| $\alpha$ -terpinene    | 0.02 $\pm$ 0.00                    | 0.04 $\pm$ 0.00                | 0.07 $\pm$ 0.00                   | n.d.                          | 0.05 $\pm$ 0.00                   | 0.14 $\pm$ 0.00               | 0.03 $\pm$ 0.00                    | 0.12 $\pm$ 0.00               | 0.21 $\pm$ 0.02               | 0.02 $\pm$ 0.00               |
| limonene               | 0.12 $\pm$ 0.00                    | 1.46 $\pm$ 0.05                | 1.99 $\pm$ 0.09                   | 0.25 $\pm$ 0.01               | 0.28 $\pm$ 0.00                   | 0.33 $\pm$ 0.00               | 0.23 $\pm$ 0.00                    | 0.25 $\pm$ 0.00               | 0.40 $\pm$ 0.00               | 0.23 $\pm$ 0.91               |
| p-cymene               | 0.21 $\pm$ 0.00                    | 0.42 $\pm$ 0.01                | <b>1.06 <math>\pm</math> 0.01</b> | 0.09 $\pm$ 0.00               | 0.55 $\pm$ 0.01                   | 0.25 $\pm$ 0.00               | 0.49 $\pm$ 0.00                    | 0.38 $\pm$ 0.00               | 0.67 $\pm$ 0.00               | 0.03 $\pm$ 0.00               |
| (+/-)-rose oxide       | 6.18 $\pm$ 0.03                    | 16.12 $\pm$ 0.20               | 18.46 $\pm$ 0.14                  | 0.26 $\pm$ 0.00               | <b>2.67 <math>\pm</math> 0.07</b> | 1.75 $\pm$ 0.04               | 2.83 $\pm$ 0.05                    | 4.92 $\pm$ 0.00               | 2.12 $\pm$ 0.02               | 0.20 $\pm$ 0.01               |
| linalool               | 14.79 $\pm$ 0.09                   | 63.94 $\pm$ 0.34               | 69.88 $\pm$ 0.16                  | 1.84 $\pm$ 0.04               | 8.85 $\pm$ 0.08                   | 14.27 $\pm$ 0.19              | 17.79 $\pm$ 0.09                   | 6.78 $\pm$ 0.05               | 10.51 $\pm$ 0.11              | 1.19 $\pm$ 0.04               |
| $\beta$ -caryophyllene | 12.42 $\pm$ 0.32                   | 11.12 $\pm$ 0.10               | 13.11 $\pm$ 0.09                  | 0.63 $\pm$ 0.02               | 8.90 $\pm$ 0.31                   | 8.22 $\pm$ 0.14               | 5.74 $\pm$ 0.08                    | 10.13 $\pm$ 0.30              | 8.62 $\pm$ 0.90               | 0.32 $\pm$ 0.02               |
| $\beta$ -damascenone   | 1.51 $\pm$ 0.22                    | 6.45 $\pm$ 0.25                | 6.86 $\pm$ 0.10                   | 0.37 $\pm$ 0.05               | 2.41 $\pm$ 0.08                   | 1.81 $\pm$ 0.14               | 1.69 $\pm$ 0.08                    | 2.12 $\pm$ 0.16               | 2.08 $\pm$ 0.01               | 0.31 $\pm$ 0.01               |
| citronellyl acetate    | 9.89 $\pm$ 0.17                    | 8.27 $\pm$ 0.07                | 9.34 $\pm$ 0.31                   | 0.53 $\pm$ 0.01               | 9.90 $\pm$ 0.17                   | 4.42 $\pm$ 0.07               | 5.21 $\pm$ 0.19                    | 9.57 $\pm$ 0.11               | 9.88 $\pm$ 0.32               | 0.25 $\pm$ 0.01               |
| citral                 | 11.81 $\pm$ 0.23                   | 9.19 $\pm$ 0.06                | 10.66 $\pm$ 0.06                  | 0.76 $\pm$ 0.08               | 5.68 $\pm$ 0.12                   | 12.89 $\pm$ 0.22              | 13.07 $\pm$ 0.02                   | 6.93 $\pm$ 0.14               | 7.92 $\pm$ 0.30               | 0.98 $\pm$ 0.04               |
| neryl acetate          | 15.27 $\pm$ 0.24                   | 12.74 $\pm$ 0.13               | 13.36 $\pm$ 0.08                  | 0.49 $\pm$ 0.01               | 7.47 $\pm$ 0.12                   | 9.52 $\pm$ 0.16               | 10.11 $\pm$ 0.07                   | 6.53 $\pm$ 0.08               | 7.73 $\pm$ 0.24               | 0.65 $\pm$ 0.02               |
| geranyl acetate        | 28.54 $\pm$ 0.65                   | 7.23 $\pm$ 0.06                | 7.90 $\pm$ 0.06                   | 1.04 $\pm$ 0.03               | 15.74 $\pm$ 0.27                  | 15.79 $\pm$ 0.26              | 11.82 $\pm$ 0.09                   | 20.84 $\pm$ 0.15              | 27.20 $\pm$ 0.16              | 0.87 $\pm$ 0.04               |
| citronellol            | 503.42 $\pm$ 8.22                  | 479.94 $\pm$ 3.50              | 496.13 $\pm$ 2.97                 | 55.38 $\pm$ 1.40              | 433.24 $\pm$ 5.56                 | 300.10 $\pm$ 4.18             | 297.12 $\pm$ 2.21                  | 419.55 $\pm$ 4.16             | 378.10 $\pm$ 2.23             | 33.81 $\pm$ 1.49              |
| nerol                  | 204.05 $\pm$ 3.53                  | 4.39 $\pm$ 0.18                | 4.11 $\pm$ 0.10                   | 14.28 $\pm$ 0.20              | 101.25 $\pm$ 1.29                 | 124.17 $\pm$ 1.69             | 107.74 $\pm$ 1.00                  | 86.26 $\pm$ 0.84              | 111.13 $\pm$ 0.64             | 10.65 $\pm$ 0.23              |
| phenylethanol          | 0.97 $\pm$ 0.02                    | 0.19 $\pm$ 0.01                | 0.18 $\pm$ 0.01                   | 0.22 $\pm$ 0.01               | <b>2.12 <math>\pm</math> 0.06</b> | 0.93 $\pm$ 0.05               | 1.11 $\pm$ 0.31                    | 4.11 $\pm$ 0.05               | 4.40 $\pm$ 0.04               | 0.12 $\pm$ 0.00               |
| geraniol               | 499.85 $\pm$ 9.12                  | 221.04 $\pm$ 1.78              | 209.02 $\pm$ 1.00                 | 29.52 $\pm$ 0.55              | 220.03 $\pm$ 2.75                 | 300.28 $\pm$ 4.29             | 210.33 $\pm$ 1.57                  | 199.17 $\pm$ 2.21             | 270.95 $\pm$ 2.09             | 23.73 $\pm$ 0.50              |
| methyleugenol          | 28.25 $\pm$ 0.69                   | 8.14 $\pm$ 0.75                | 6.27 $\pm$ 0.06                   | 4.16 $\pm$ 0.07               | 32.84 $\pm$ 0.38                  | 8.97 $\pm$ 0.17               | 29.63 $\pm$ 0.29                   | 34.61 $\pm$ 0.61              | 35.98 $\pm$ 0.55              | 0.50 $\pm$ 0.02               |
| eugenol                | 21.93 $\pm$ 0.72                   | 3.39 $\pm$ 0.07                | 3.02 $\pm$ 0.04                   | 3.19 $\pm$ 0.06               | 15.32 $\pm$ 0.45                  | 12.25 $\pm$ 0.34              | 8.00 $\pm$ 0.11                    | 13.31 $\pm$ 0.12              | 22.19 $\pm$ 1.47              | 0.73 $\pm$ 0.01               |
| farnesol               | <b>81.18 <math>\pm</math> 5.82</b> | 2.95 $\pm$ 0.27                | 0.49 $\pm$ 0.07                   | 3.73 $\pm$ 0.19               | 23.16 $\pm$ 0.57                  | 30.92 $\pm$ 0.57              | <b>40.26 <math>\pm</math> 0.47</b> | 23.53 $\pm$ 0.52              | 29.20 $\pm$ 1.25              | 3.21 $\pm$ 0.15               |

Table S6: Concentration determination of 10 authentic rose oils after chiral analysis. Bold numbers are concentrations slightly out of the calibration range. EE and DE for stereoisomers is given.

[illegible]

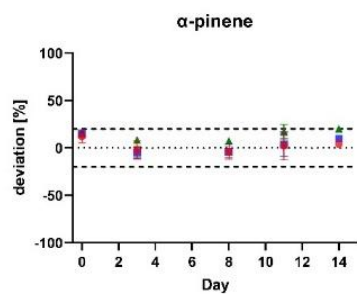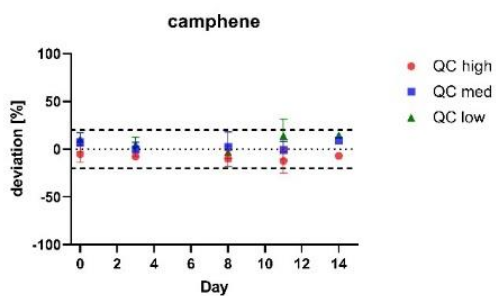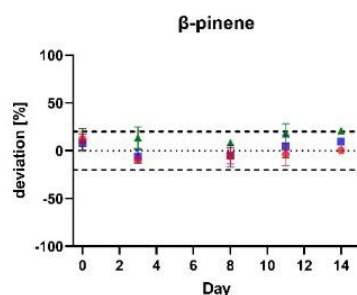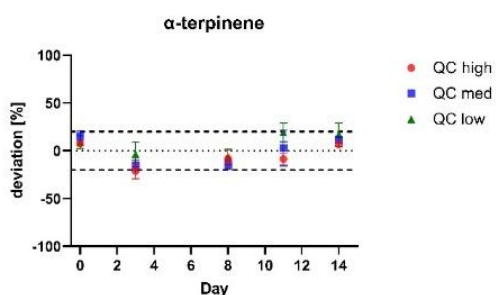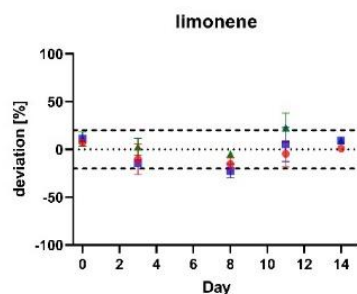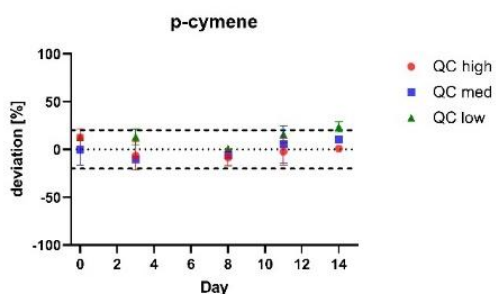



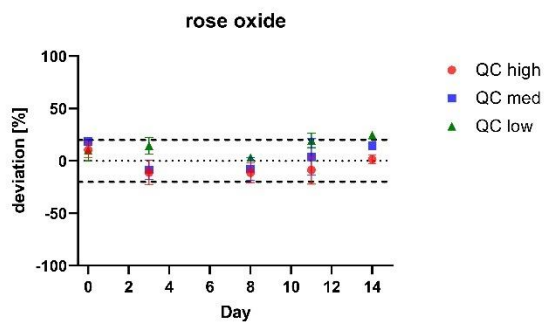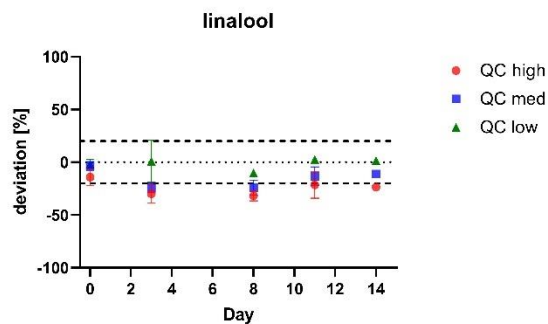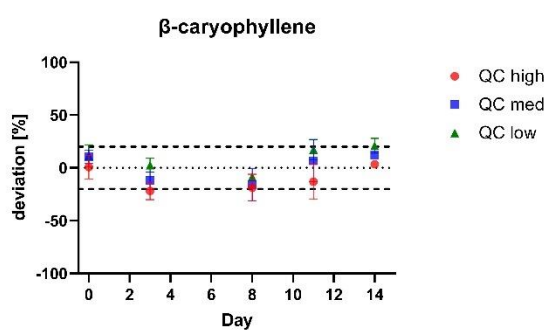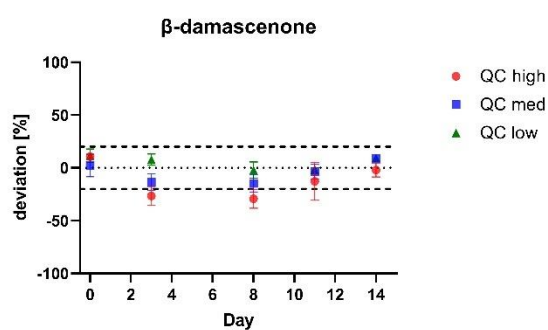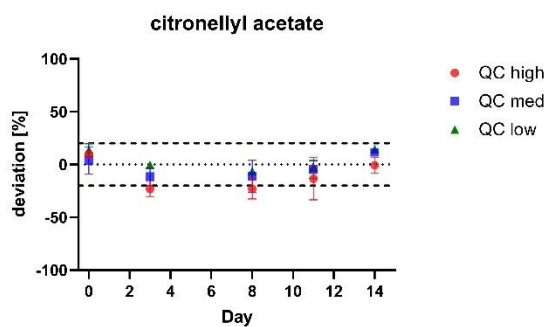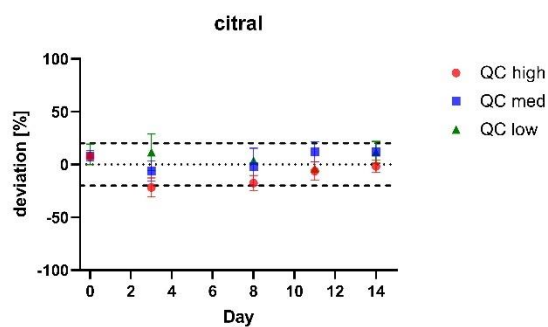

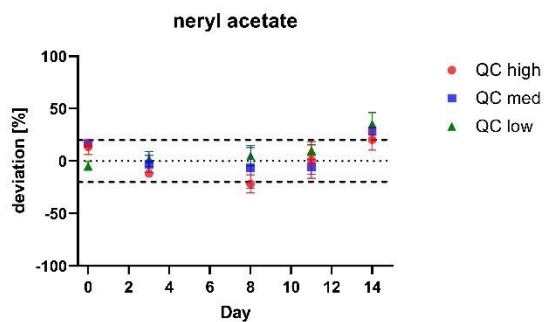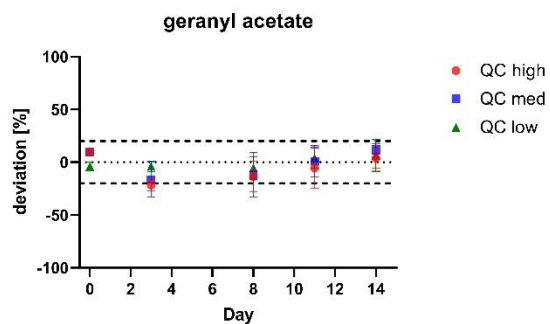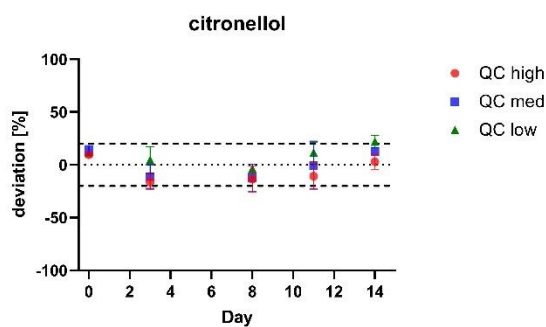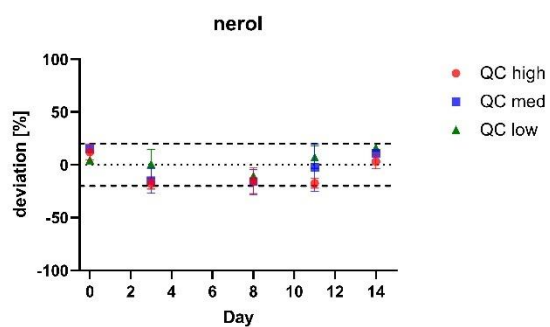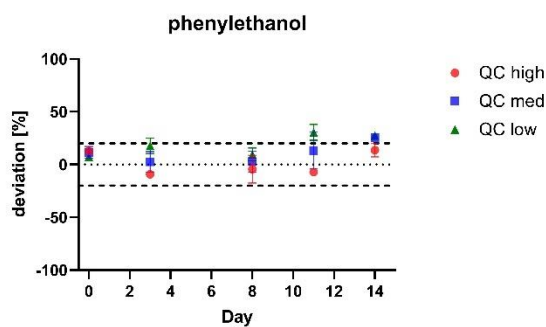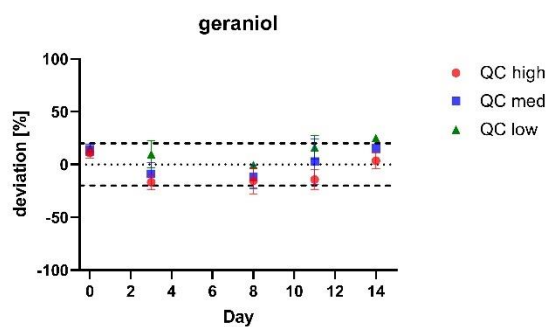

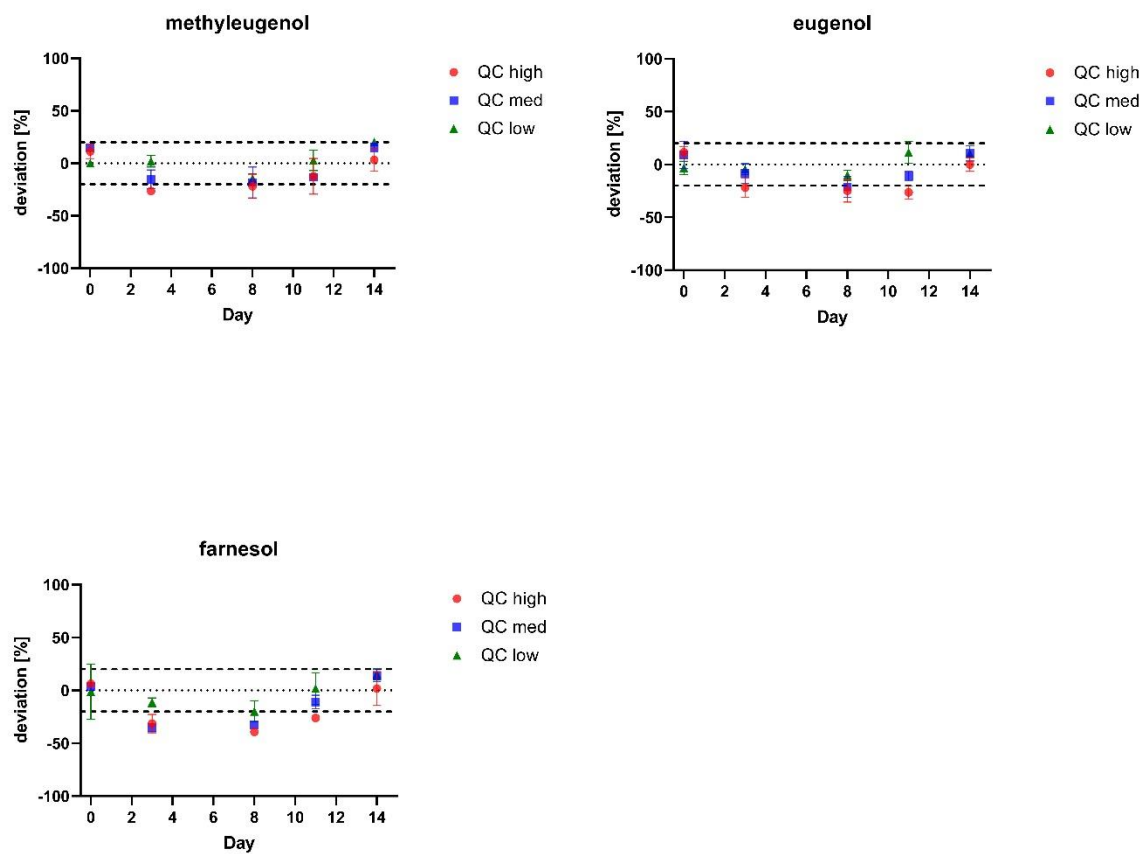

Figure S1: QC stability for samples analysed on the DB Wax column. Thick stippled lines indicate a 20% deviation from measured to calculated value. Validation took place on 5 days during a course of 2 weeks.

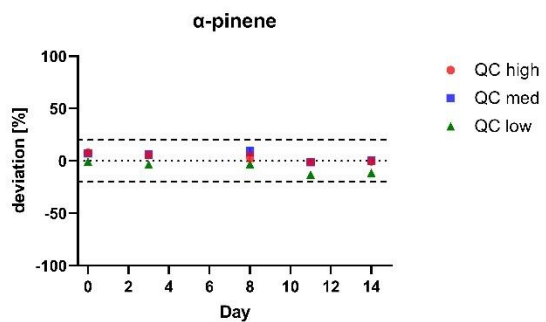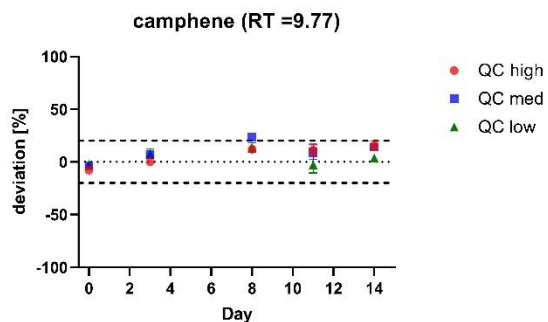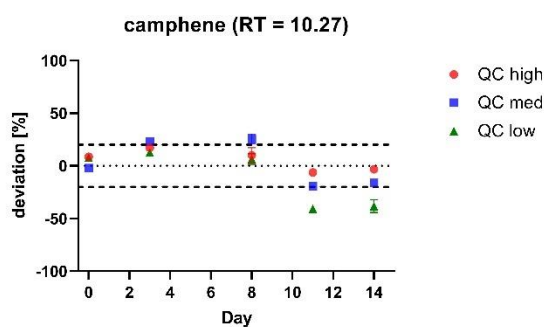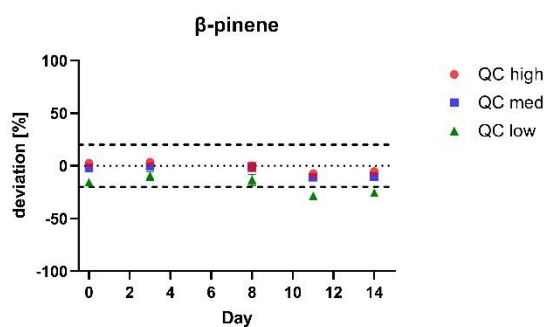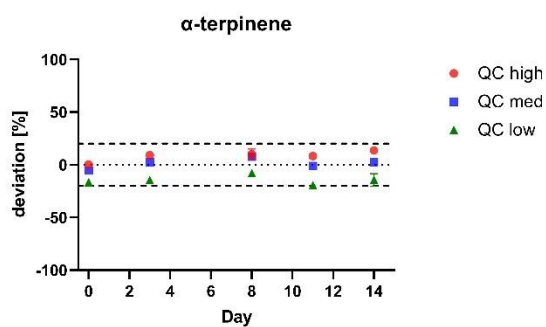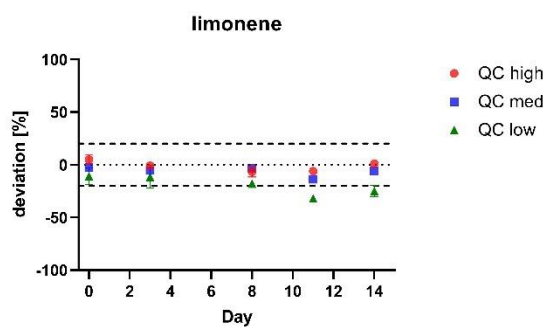

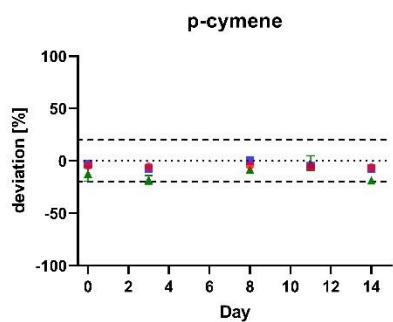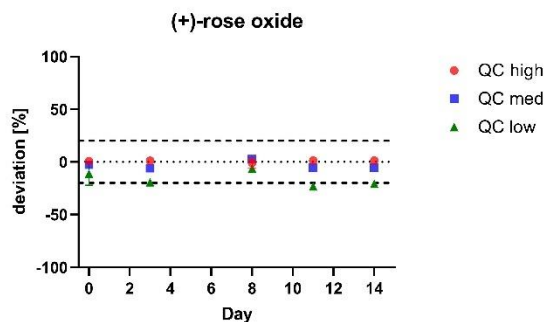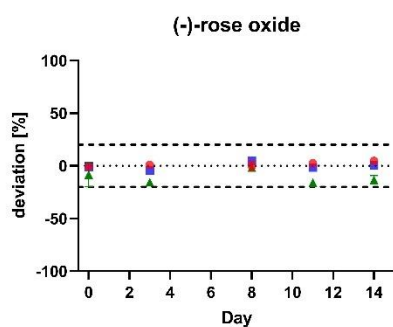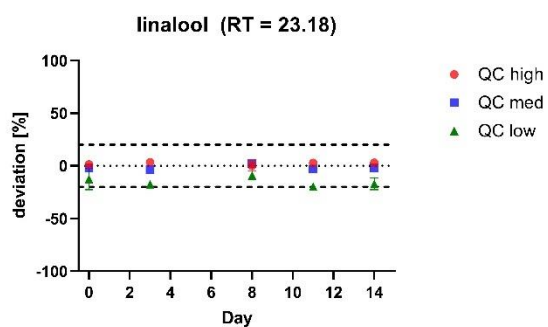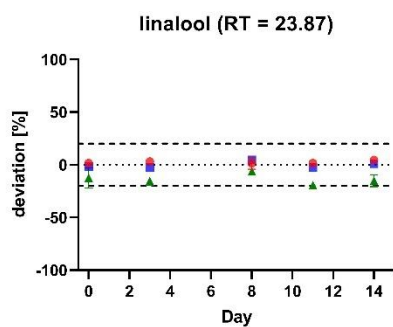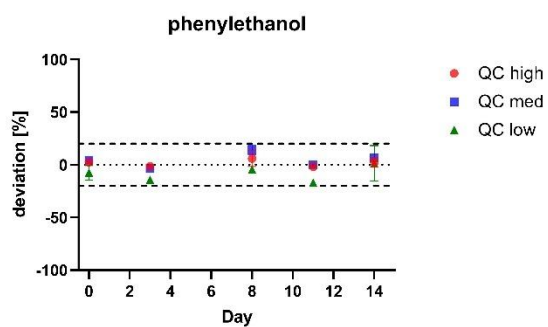

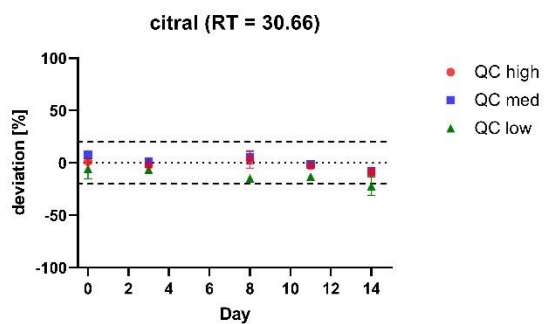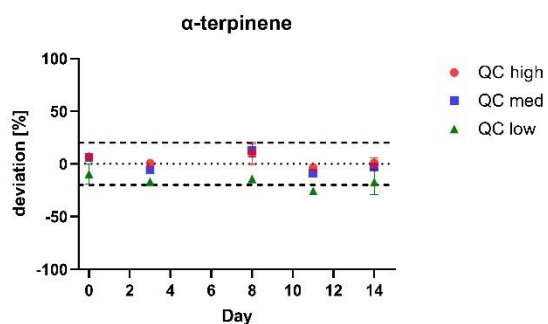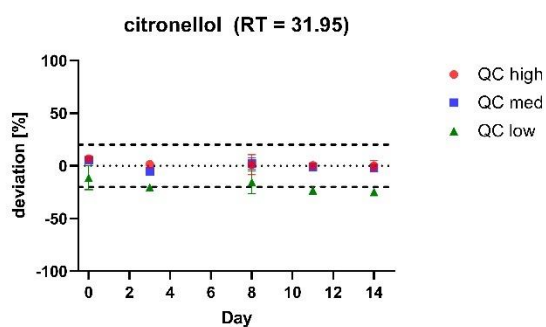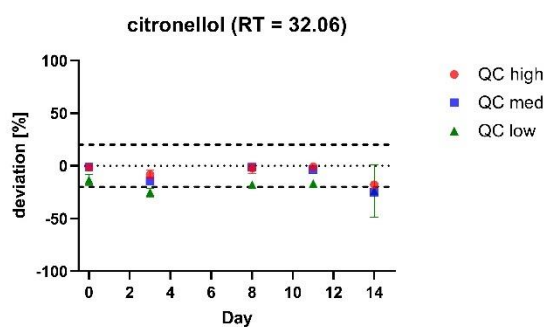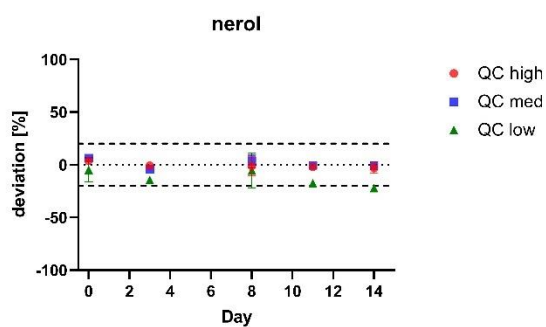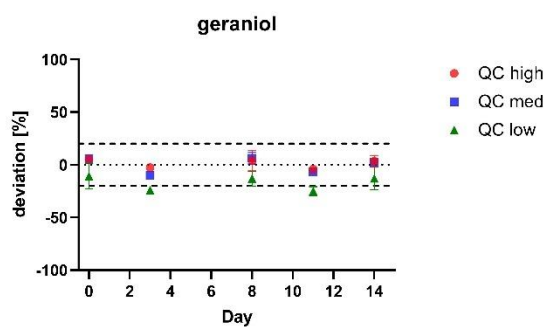

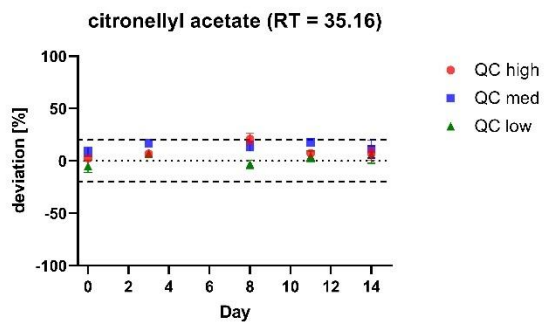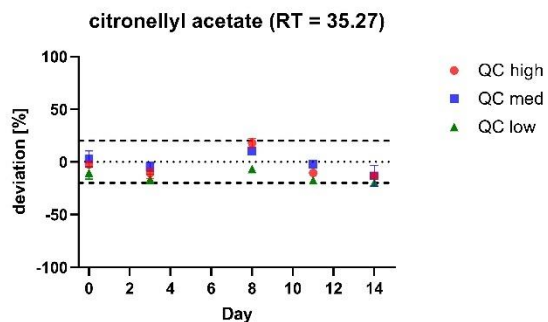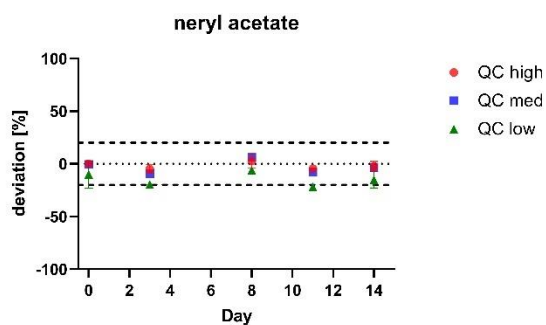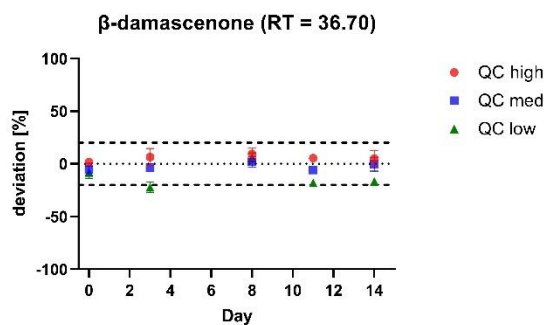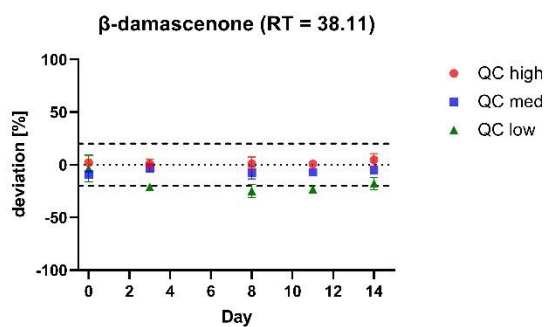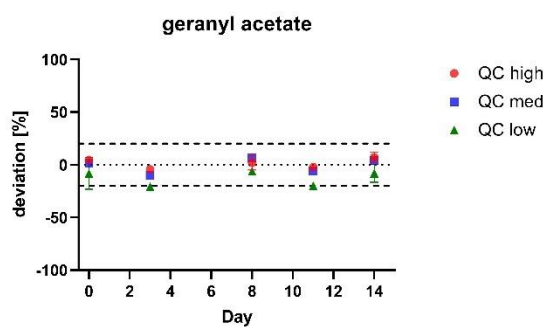

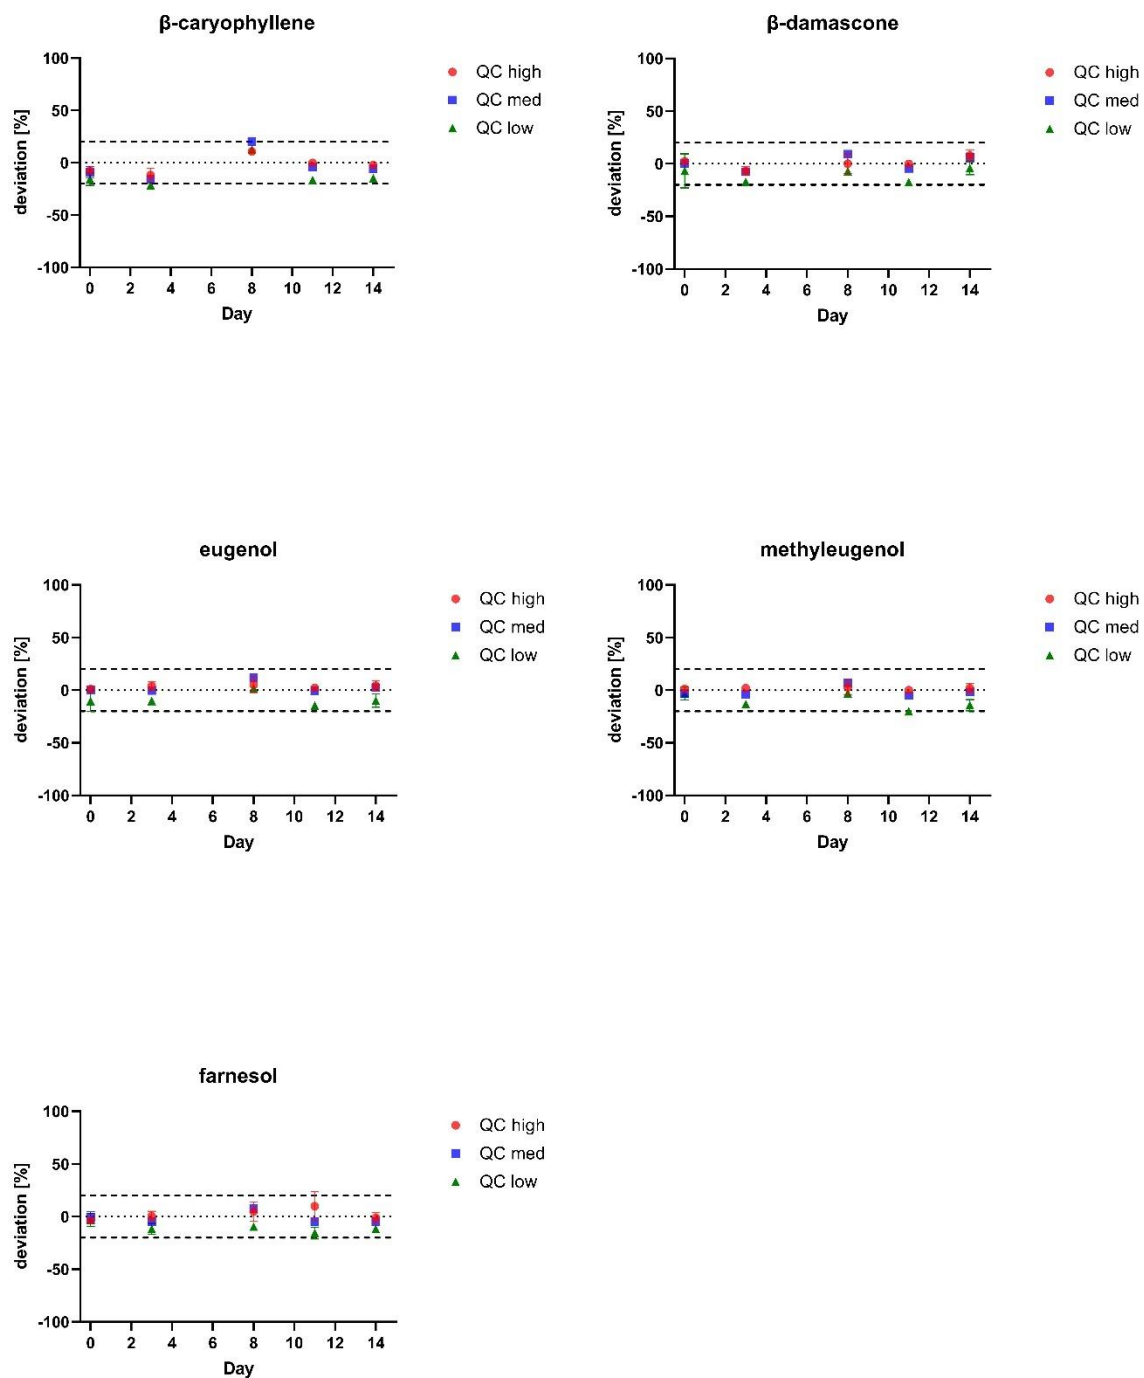

Figure S2: QC stability for samples analysed on the chiral column. Thick stippled lines indicate a 20% deviation from measured to calculated value. Validation took place on 5 days during a course of 2 weeks.



## Matlab-Code

%% Script used for the chromatographic peak integration from data collected using ChromCard. Data can be downloaded as a txt-file (export data as ASCII).  
%% Retention times for peaks have to be selected beforehand and imported as a txt-file to the script.

```
peak_width          = 0.1; %% Select desired peak width. As a default 0.1 can be
selected
peak_width_half     = peak_width/2;
retention_times     = readmatrix("Retention_times.txt"); %%import retention times
as a column in form of a txt file
peak_bounds_start   = abs(retention_times - peak_width_half);
peak_bounds_end     = abs(retention_times + peak_width_half);
peak_bounds         = zeros(1, length(retention_times)*2);
npeaks              = length(peak_bounds)/2;

for i=1:npeaks

    peak_bounds(2*i-1) = peak_bounds_start(i);
    peak_bounds(2*i)   = peak_bounds_end(i);

end

idx_peak_bounds = zeros(1, length(peak_bounds)); % zero vector with number of Peak
bounds
peaks           = zeros(1, npeaks); % zero vector with amount of peaks -> used to
store area under the curve

% upload data as .txt file

Chrom_Data      = readmatrix("myData.txt"); %Import ChromCard Data as txt file
time            = Chrom_Data(:,1); % extract time as vector in minutes
uV              = Chrom_Data(:, end); % extract uV as vector
noiseThresh     = 1340; % read from chromatogram where the noise is about
Ts              = time(2)-time(1); % sampling interval (in what amount of time
is a data point constructed in [min])

noise           = uV;
noise(noise > noiseThresh) = NaN; % NaN=not a number, defines value not as zero
but not defined yet, defines noise as all values below the noise

% Moving Average for noise filtering
T_window       = 1; % min ... width over which the moving average is taken
nSamples       = T_window / Ts; % amounts of data points that are collected over a
minute
noise_avg      = movmean(noise, nSamples, 'omitnan'); % movmean -> returns mean
values over an array -> sliding window. Noise (is uV below threshold), nSamples is
data points for a certain time frame and omitnan a function which jumps over NaN
values

% Determine Peak Index and Integration

for i=1:npeaks
```

```

        timeDiffStart      = abs(time - peak_bounds(2*i - 1)); % find minimum
difference between peak bounds and time
        timeDiffMinStart   = min(timeDiffStart);
        idxPkStart         = find(timeDiffStart == timeDiffMinStart); % find index of
minimum (equal to index of startpeak)
        timeDiffEnd        = abs(time - peak_bounds(2*i));
        timeDiffMinEnd     = min(timeDiffEnd);
        idxPkEnd           = find(timeDiffEnd == timeDiffMinEnd);
        idx_peak_bounds(2*i-1) = idxPkStart;
        idx_peak_bounds(2*i)   = idxPkEnd;
        peaks(i)              = trapz(time(idxPkStart:idxPkEnd,1),
uV(idxPkStart:idxPkEnd,1) - noise_avg(idxPkStart))*60; % Integration + Offset
correction, Unit is s*uV

        meep = noise_avg(idxPkStart);
        if (isscalar(meep) && isfinite(meep))
            % Plot area of peaks
            plot(time,uV)
            xlabel('time [min]');
            ylabel('uV');
            legend('Data');
            hold on;
        %
            area(time(idxPkStart:idxPkEnd,1),uV(idxPkStart:idxPkEnd,1),
noise_avg(idxPkStart))

            area(time(idxPkStart:idxPkEnd,1),uV(idxPkStart:idxPkEnd,1), meep)

            colororder('red')
        end
    end

area = transpose(peaks);
area_RT = [retention_times(:), area(:)];

filename = 'myData.xlsx' %write data output from integration as an excel file
xlswrite(filename, area_RT)

clear all

```

## MS-spectra:

Table 1: detailed information about the samples analysed using GC-MS.

| Number  | 3018                | 3057                 | 3058                 | 3053                | 3021                | 3072                | 3073                |
|---------|---------------------|----------------------|----------------------|---------------------|---------------------|---------------------|---------------------|
| species | <i>R. damascena</i> | <i>P. graveolens</i> | <i>P. graveolens</i> | <i>R. damascena</i> | <i>R. damascena</i> | <i>R. damascena</i> | <i>R. damascena</i> |
| quality | pure                | pure                 | pure                 | 10%                 | pure                | pure                | pure                |
| origin  | Bulgaria            | NA                   | NA                   | Morocco             | Turkey              | Bulgaria            | Bulgaria            |

Alpha pinene

Reference:

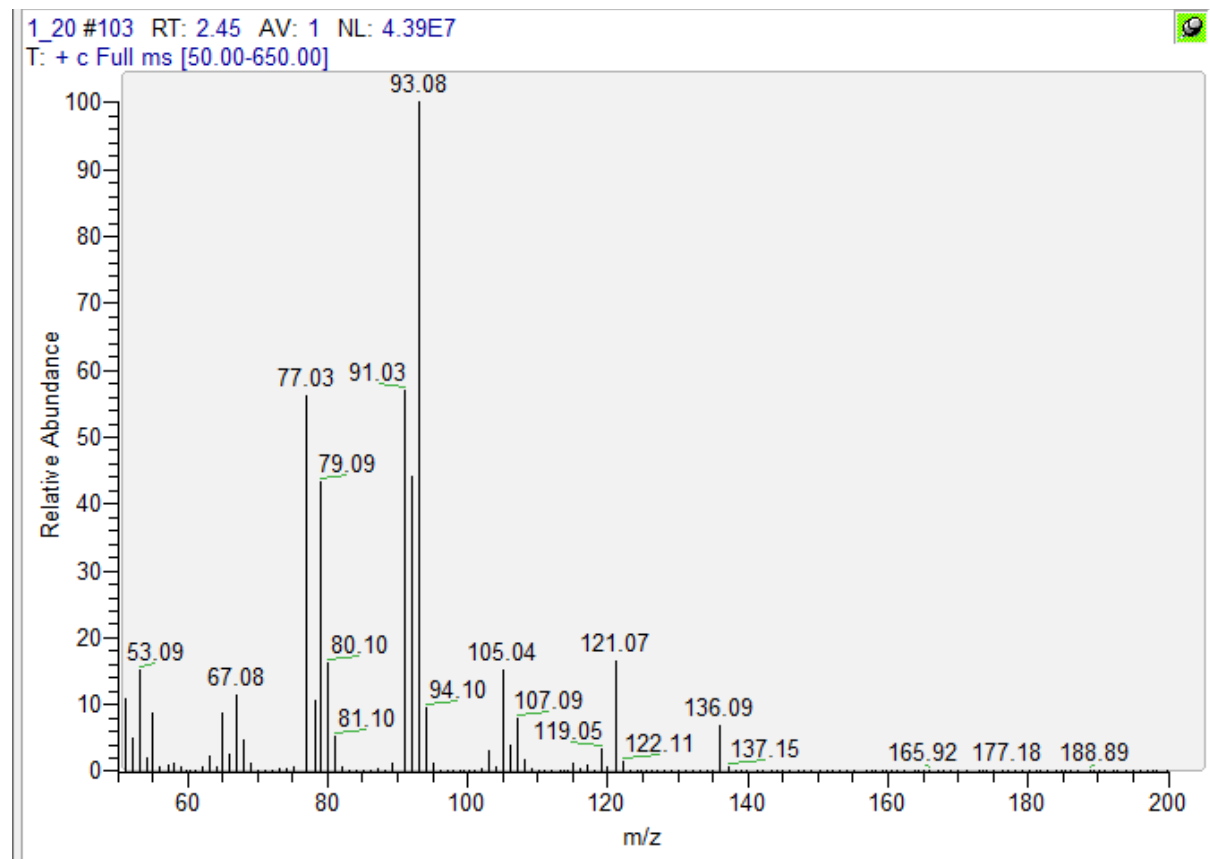

Samples:

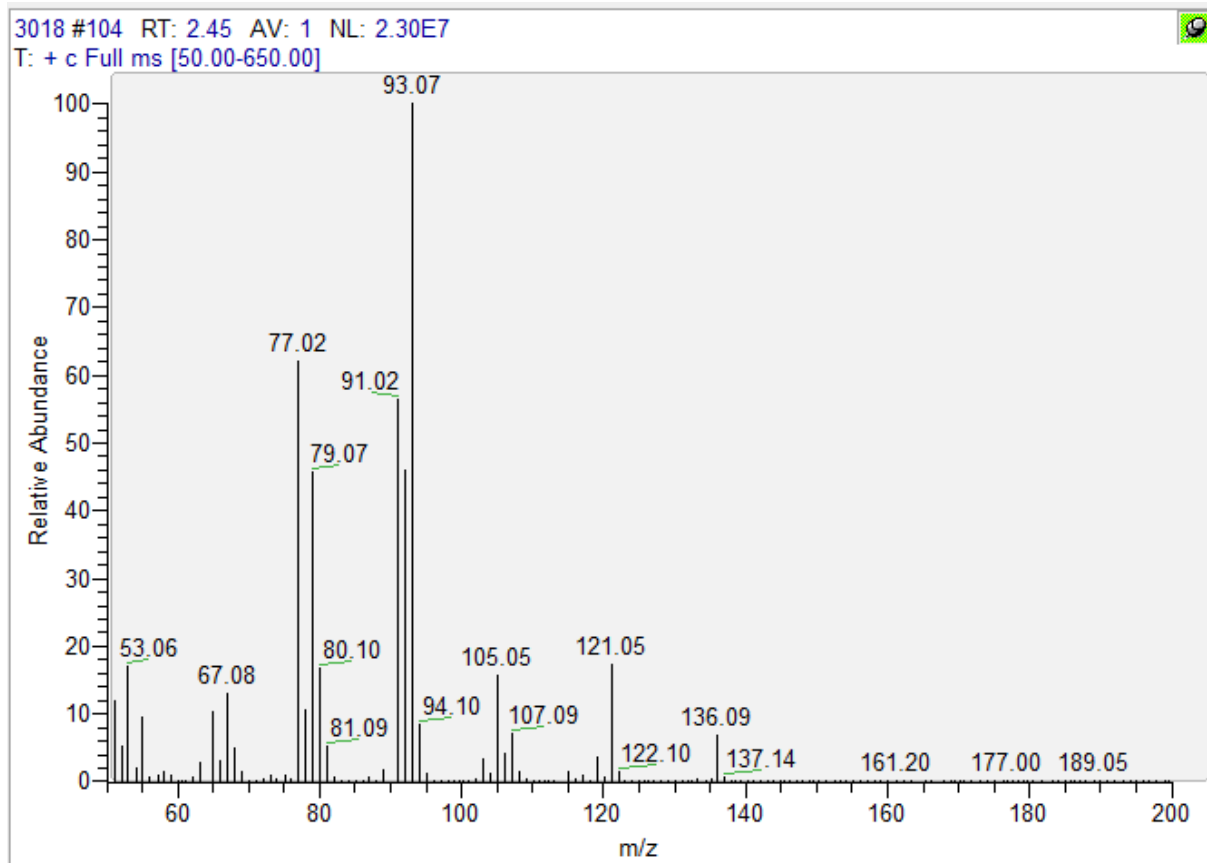

3021 #104 RT: 2.46 AV: 1 NL: 7.16E7  
T: + c Full ms [50.00-650.00]

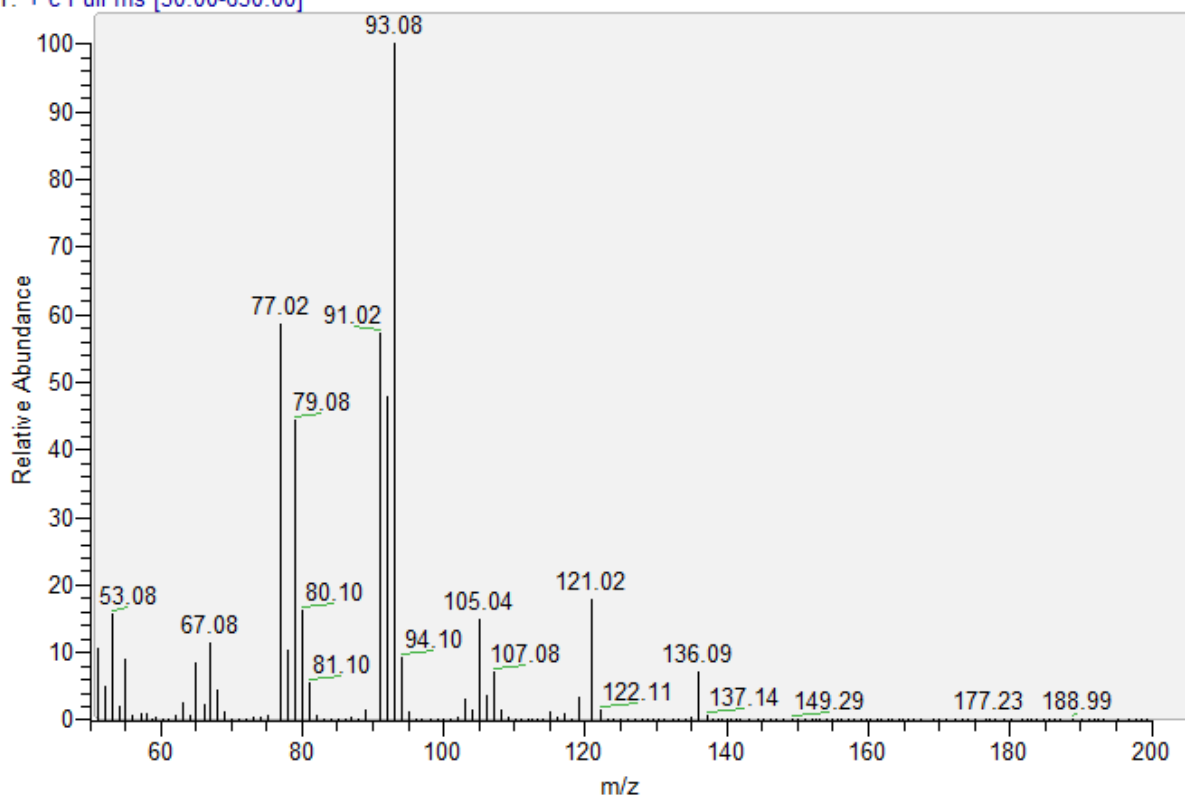

3053 #103-104 RT: 2.44-2.46 AV: 2 NL: 2.51E6  
T: + c Full ms [50.00-650.00]

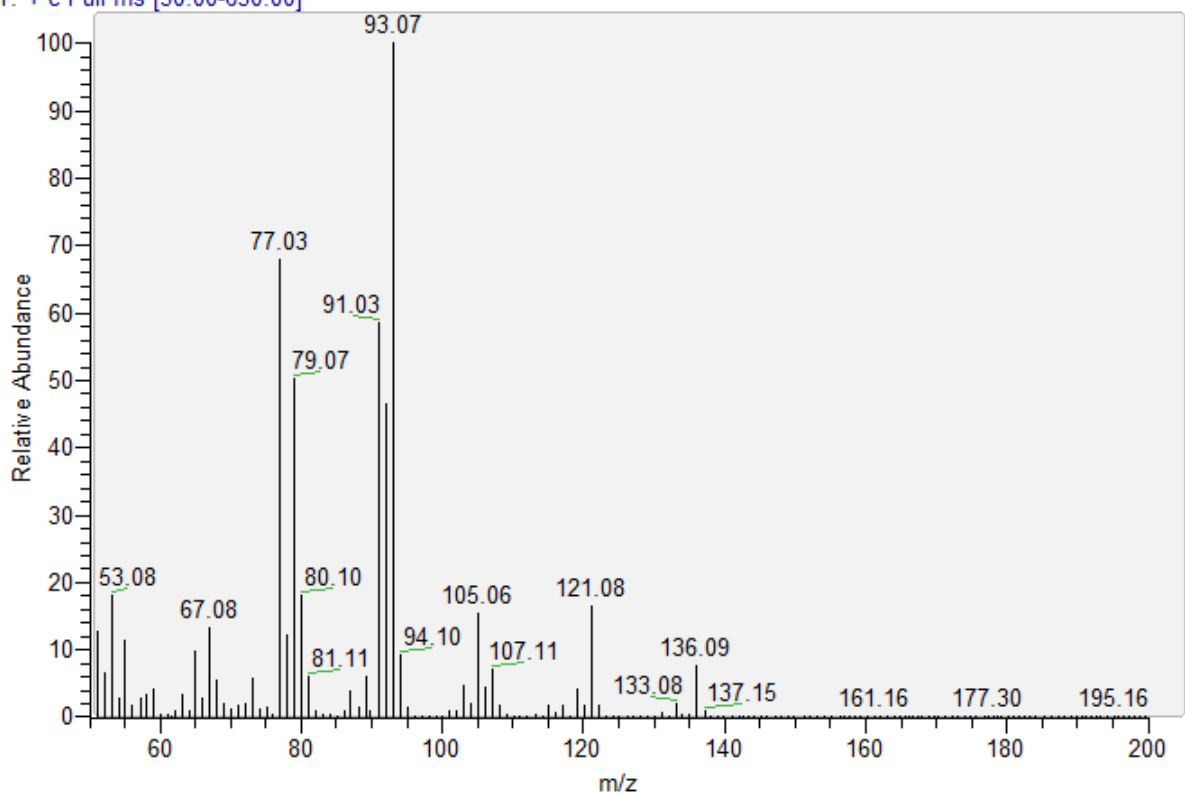

3057 #105 RT: 2.45 AV: 1 NL: 1.82E7  
T: + c Full ms [50.00-650.00]

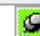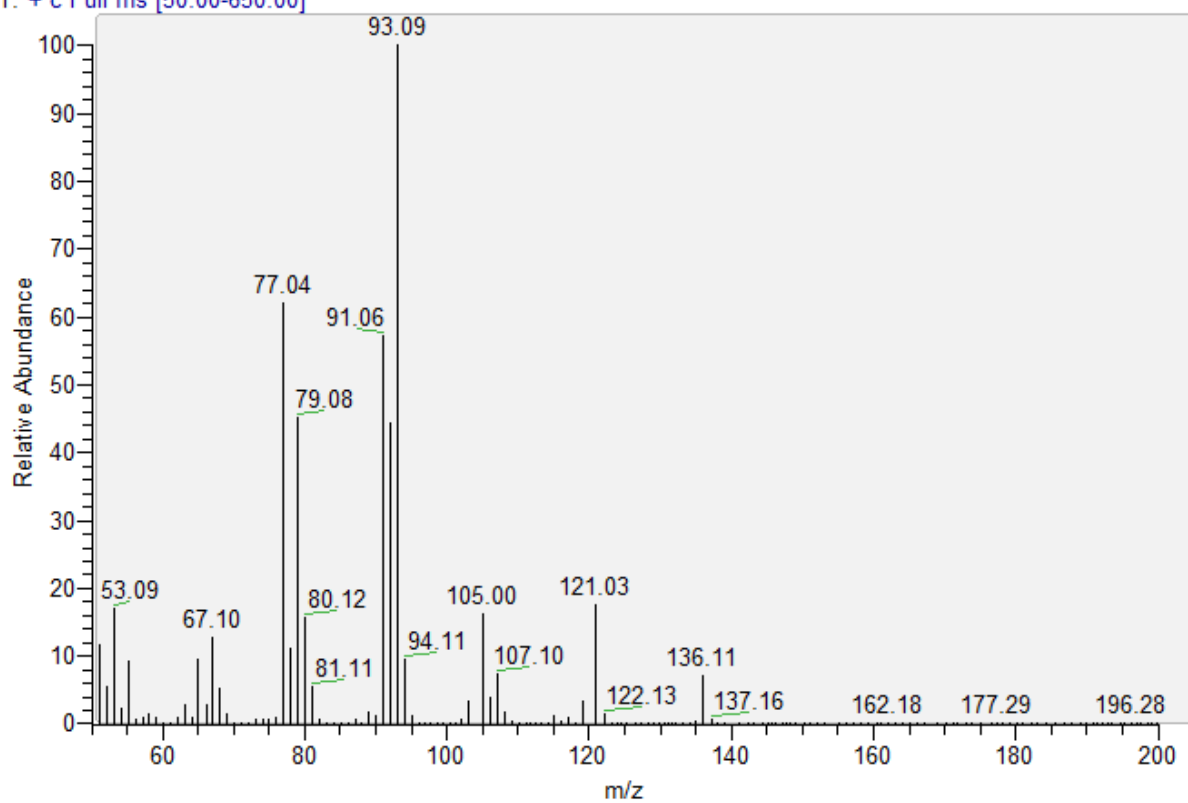

3058 #102 RT: 2.44 AV: 1 NL: 4.80E7  
T: + c Full ms [50.00-650.00]

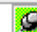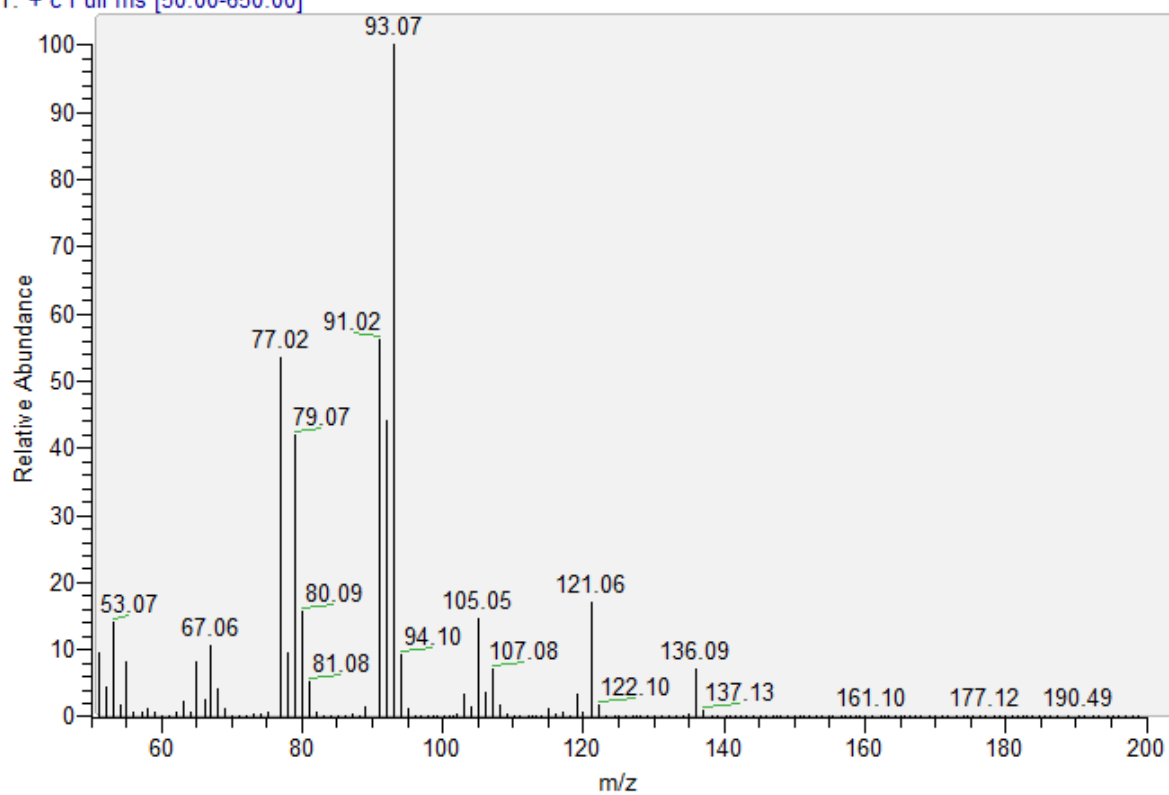



3070 #104 RT: 2.46 AV: 1 NL: 5.34E6  
T: + c Full ms [50.00-650.00]

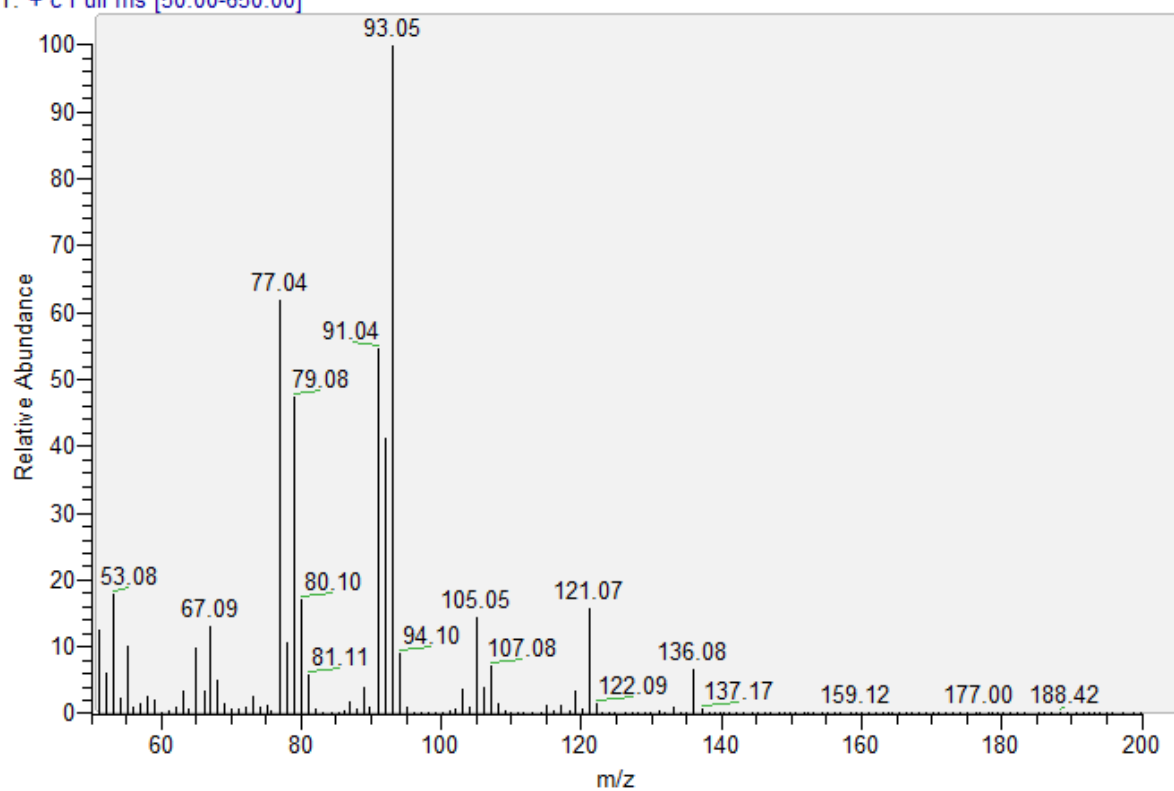

3072 #103-104 RT: 2.45-2.47 AV: 2 NL: 3.90E7  
T: + c Full ms [50.00-650.00]

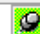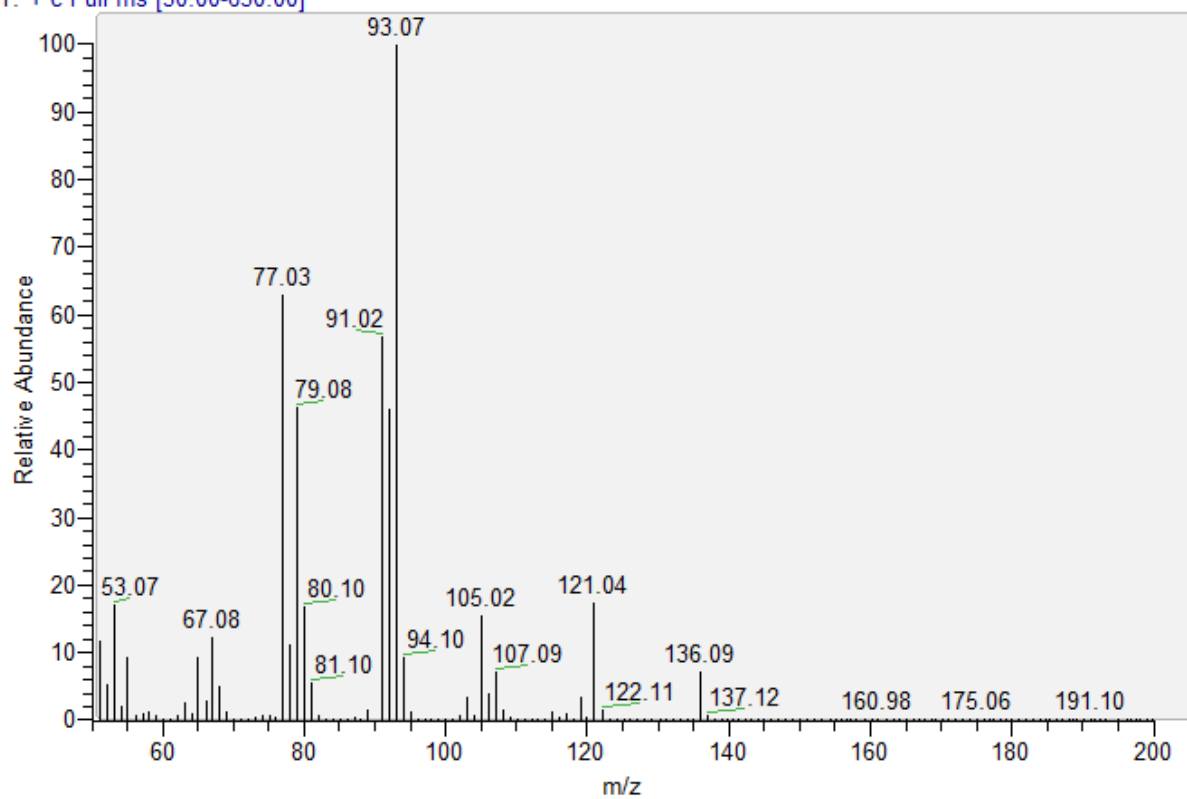

3073 #102-103 RT: 2.43-2.45 AV: 2 NL: 1.20E7  
T: + c Full ms [50.00-650.00]

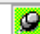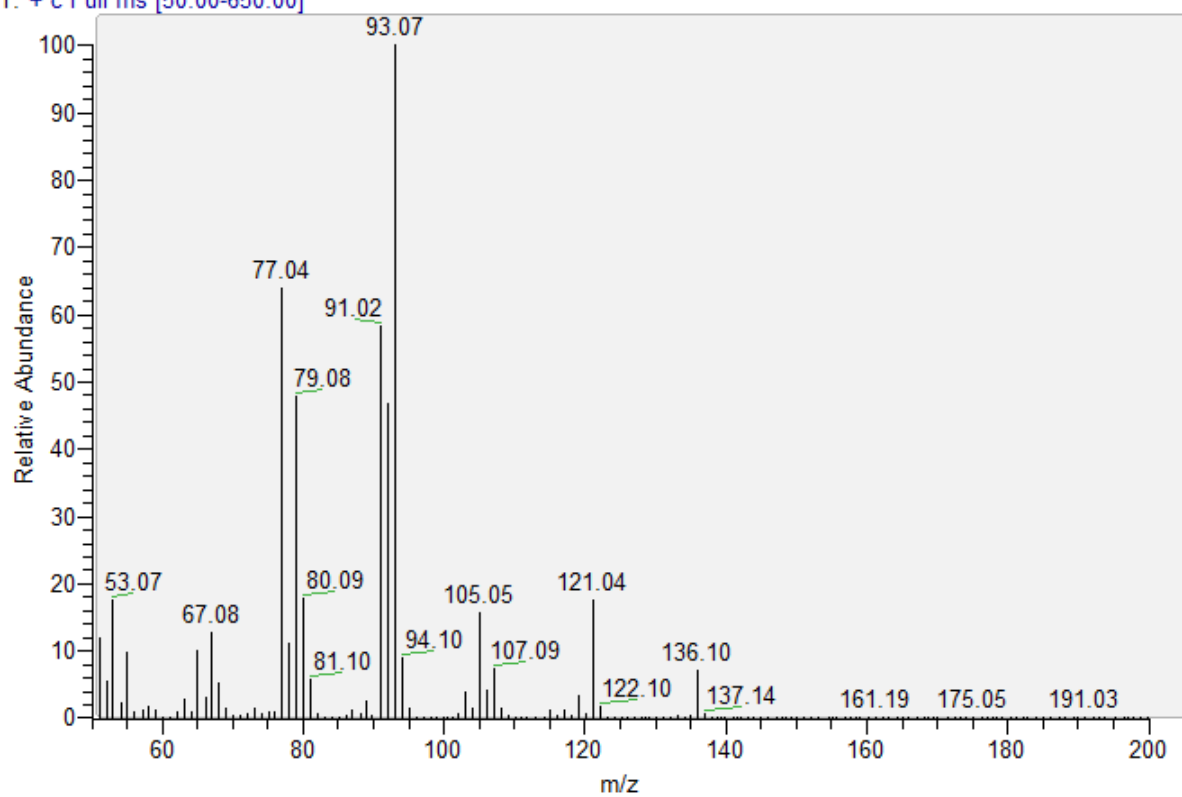

3074 #104 RT: 2.46 AV: 1 NL: 8.46E7  
T: + c Full ms [50.00-650.00]

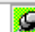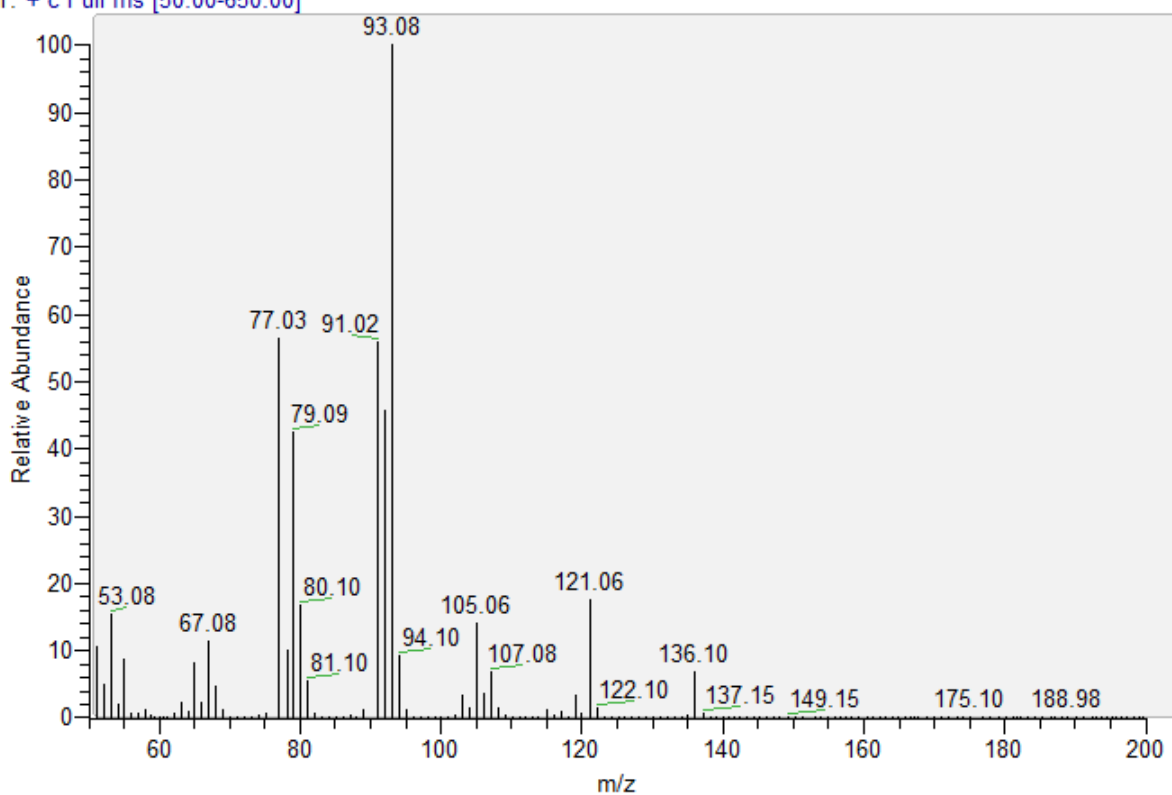

3075 #103 RT: 2.46 AV: 1 NL: 3.50E7  
T: + c Full ms [50.00-650.00]

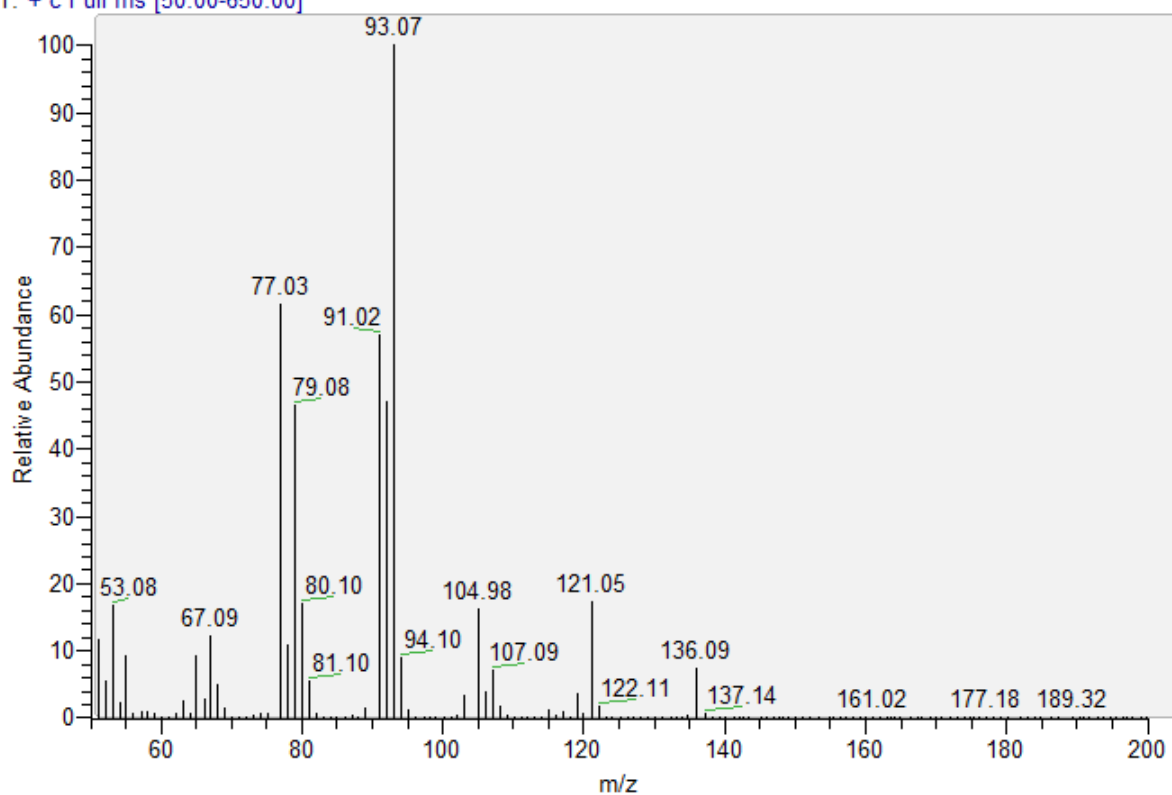

Camphene

Reference

1\_20 #128 RT: 3.05 AV: 1 NL: 2.87E6  
T: + c Full ms [50.00-650.00]

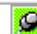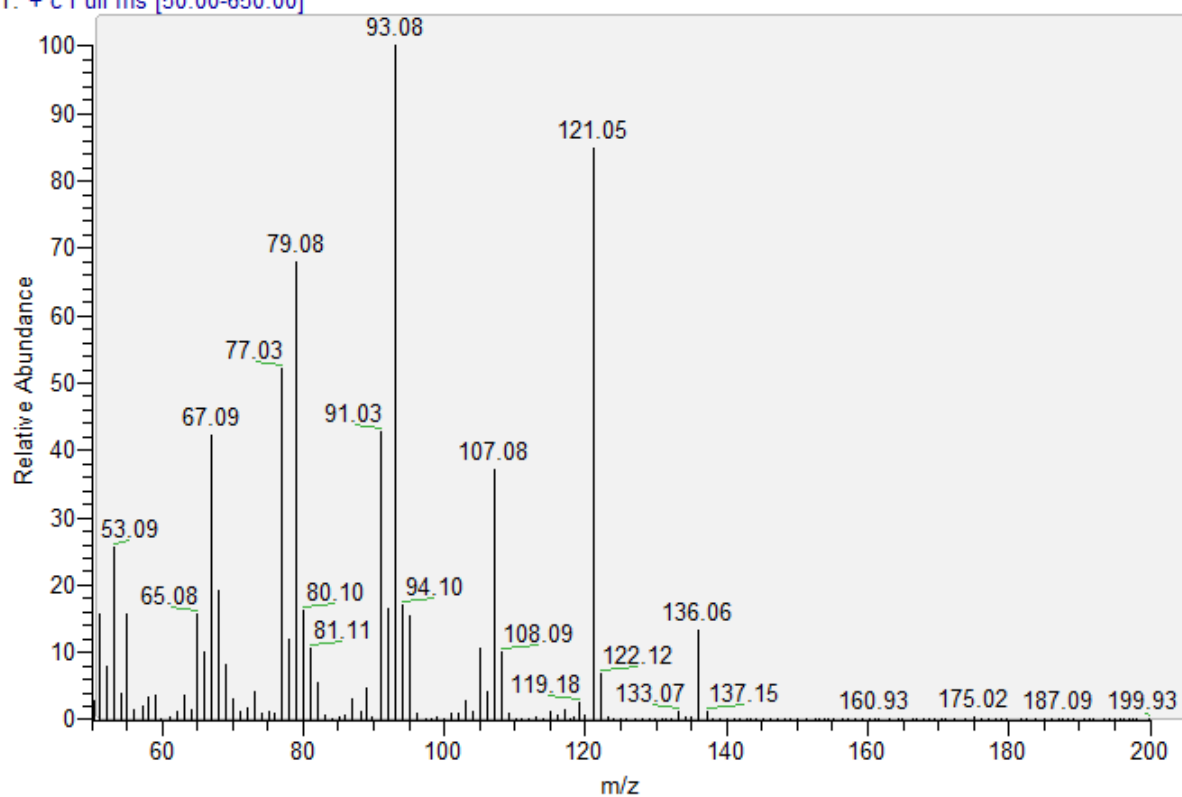

Samples:

3021 #128-129 RT: 3.03-3.06 AV: 2 NL: 1.54E5  
T: + c Full ms [50.00-650.00]

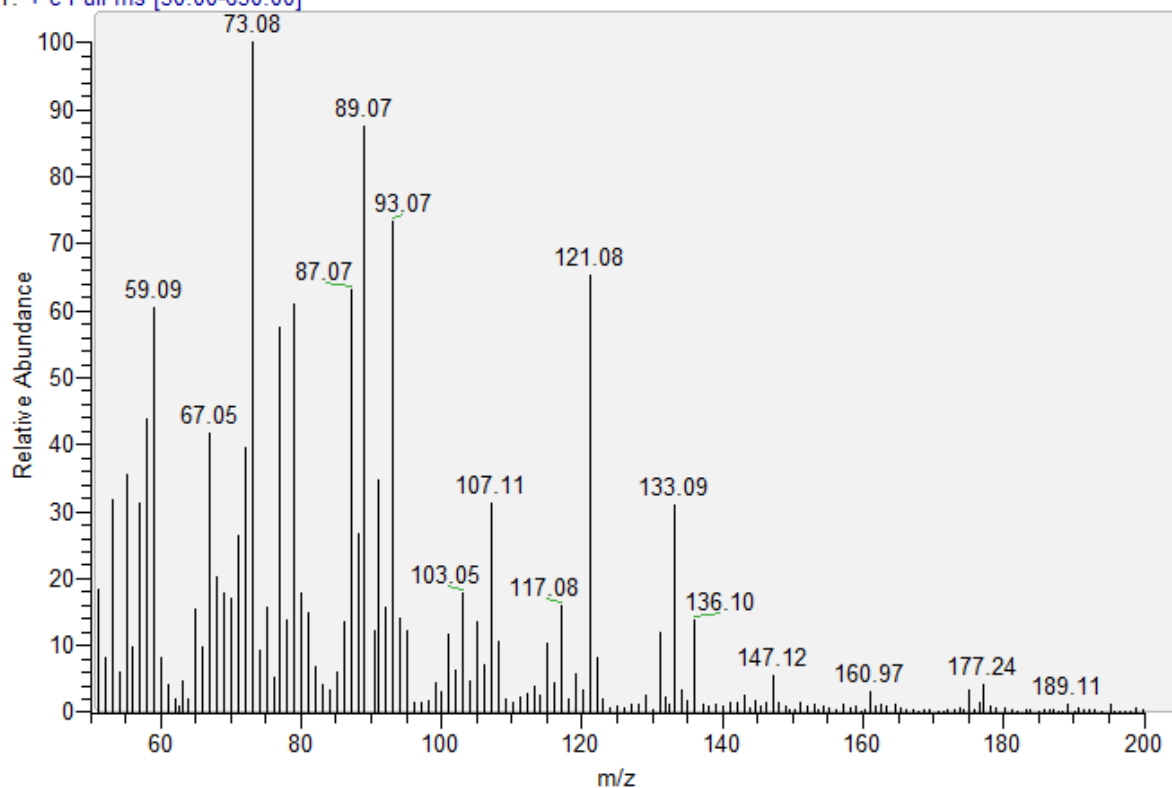

3057 #130 RT: 3.04 AV: 1 NL: 1.00E5  
T: + c Full ms [50.00-650.00]

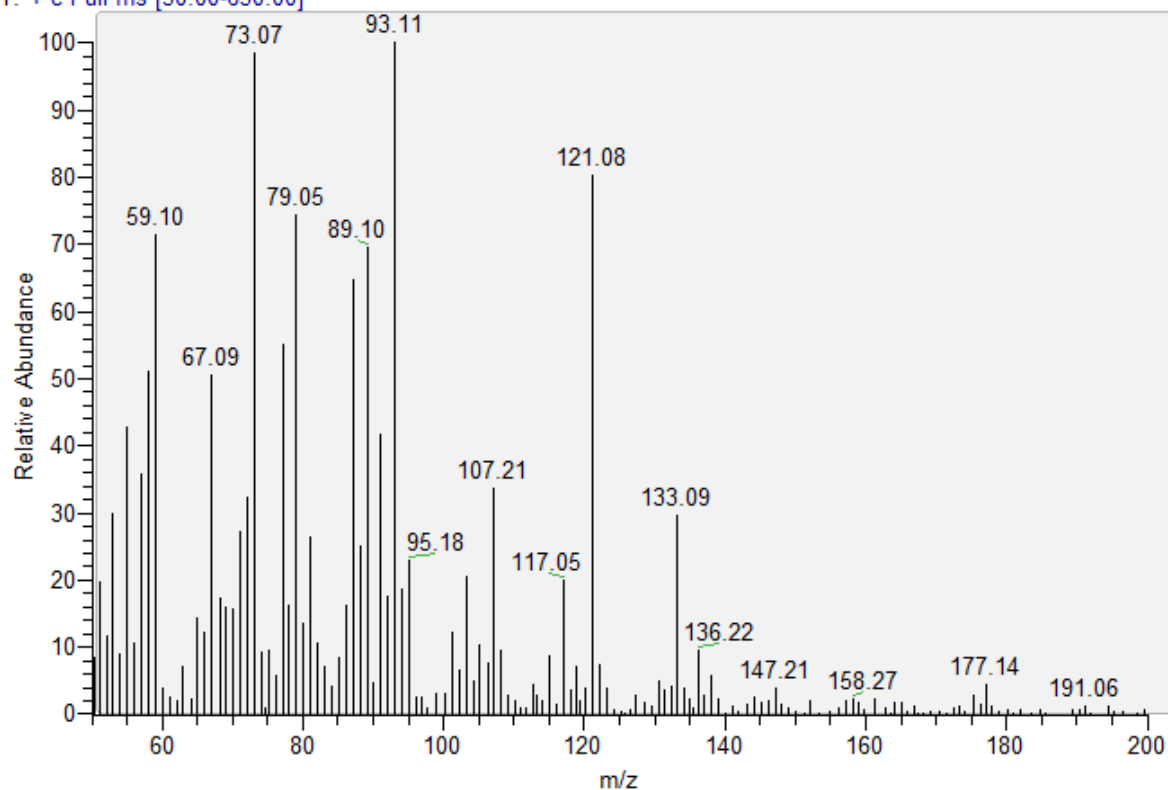



3058 #127 RT: 3.03 AV: 1 NL: 1.64E5  
T: + c Full ms [50.00-650.00]

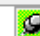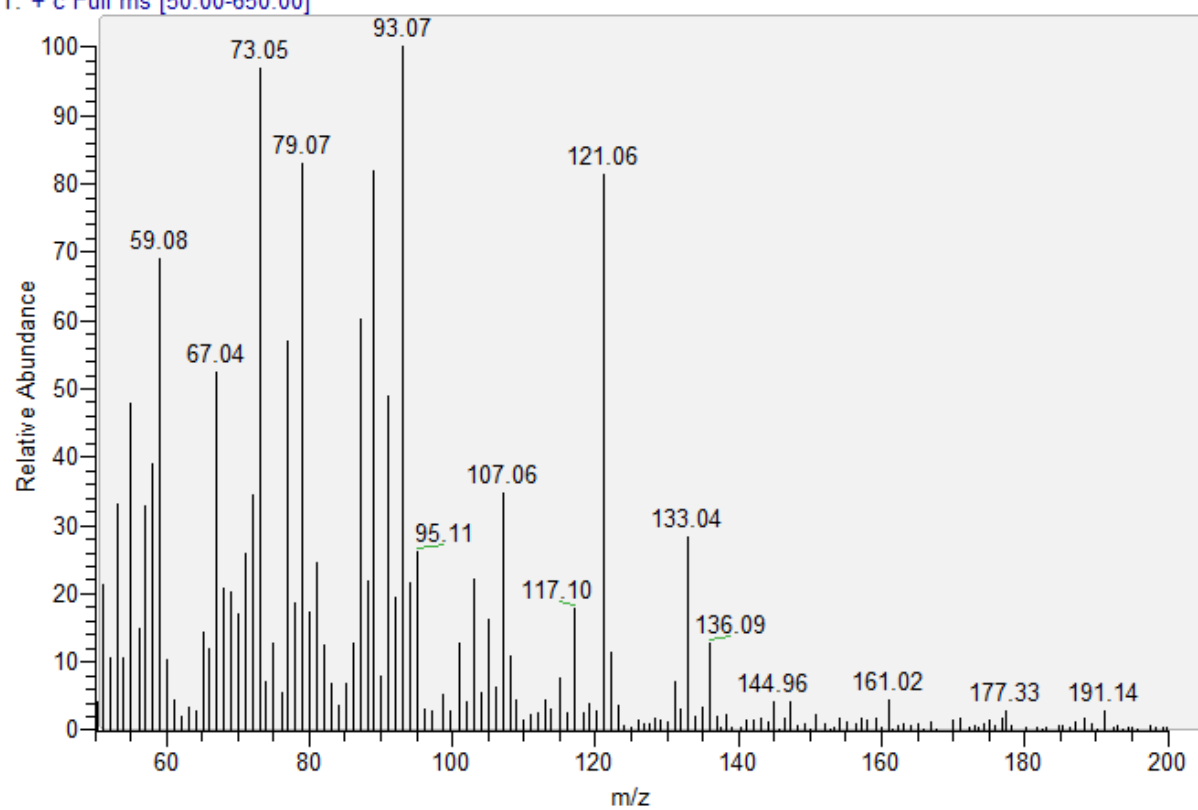

3053 #127-128 RT: 3.01-3.03 AV: 2 NL: 1.45E5  
T: + c Full ms [50.00-650.00]

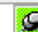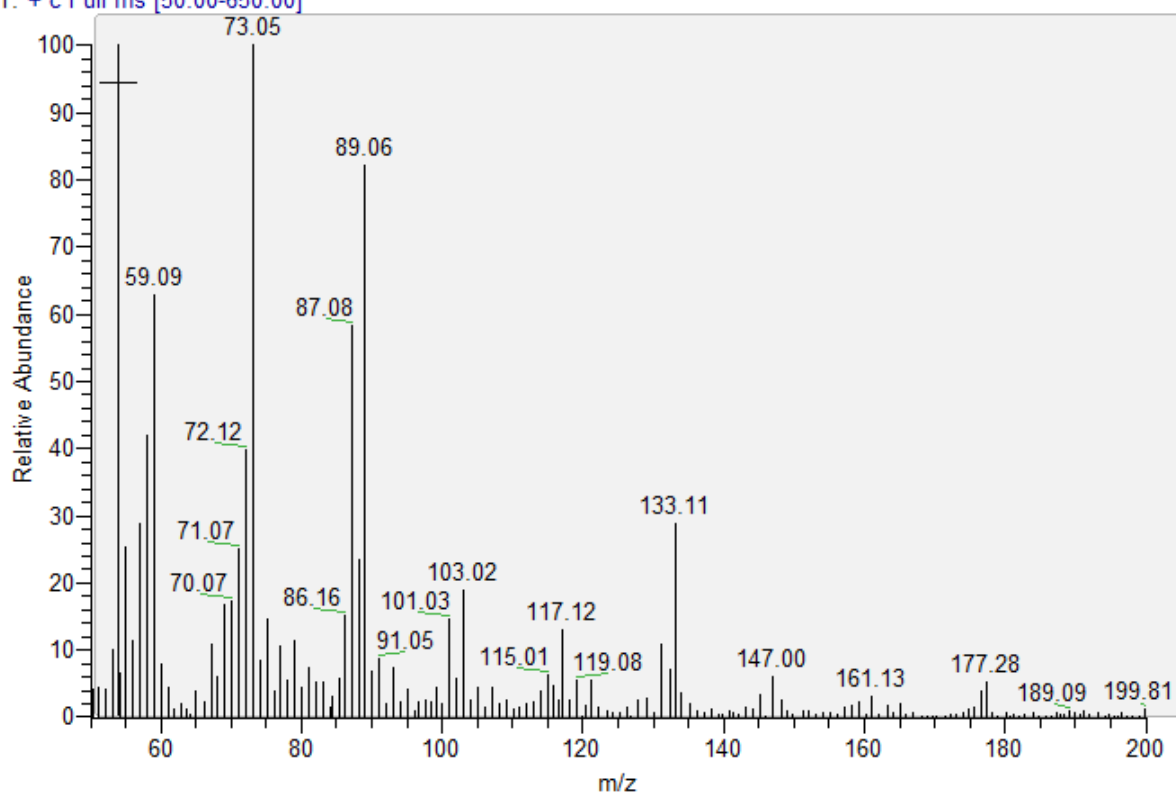

3075 #127-128 RT: 3.03-3.05 AV: 2 NL: 1.40E5  
T: + c Full ms [50.00-650.00]

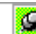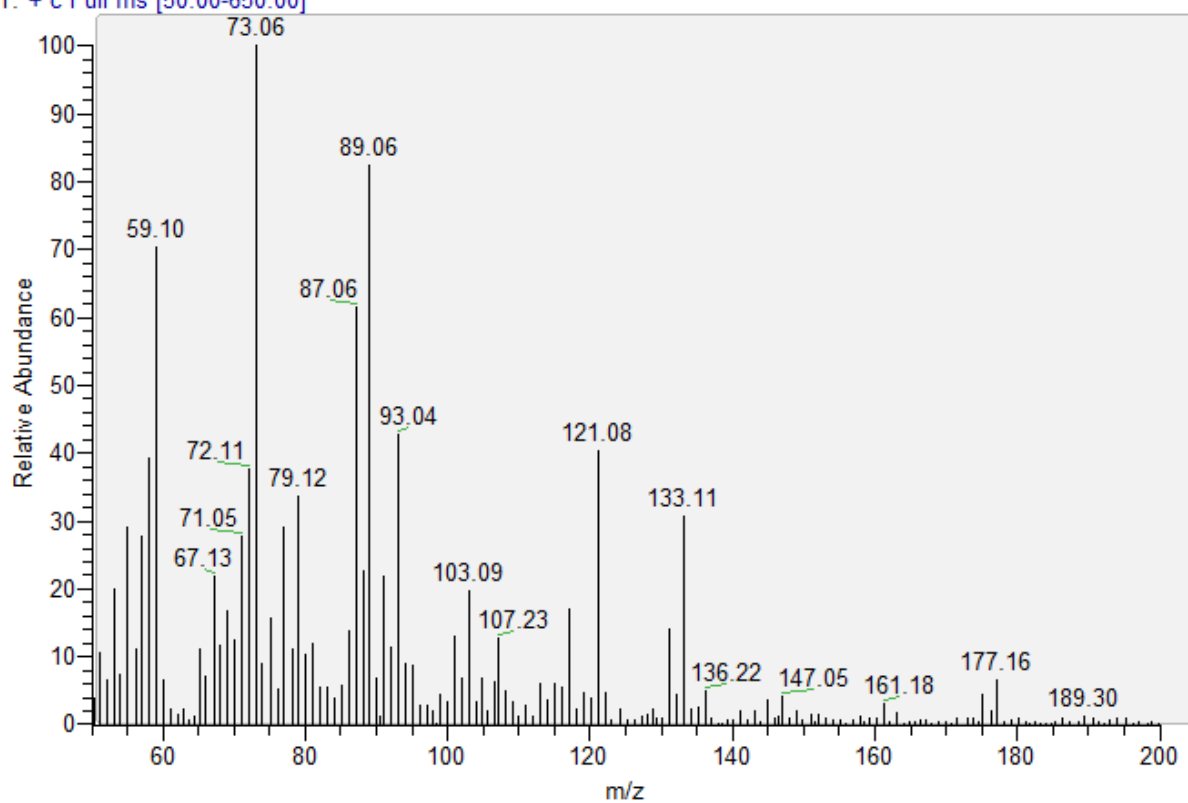

3018 #129 RT: 3.04 AV: 1 NL: 1.44E5  
T: + c Full ms [50.00-650.00]

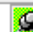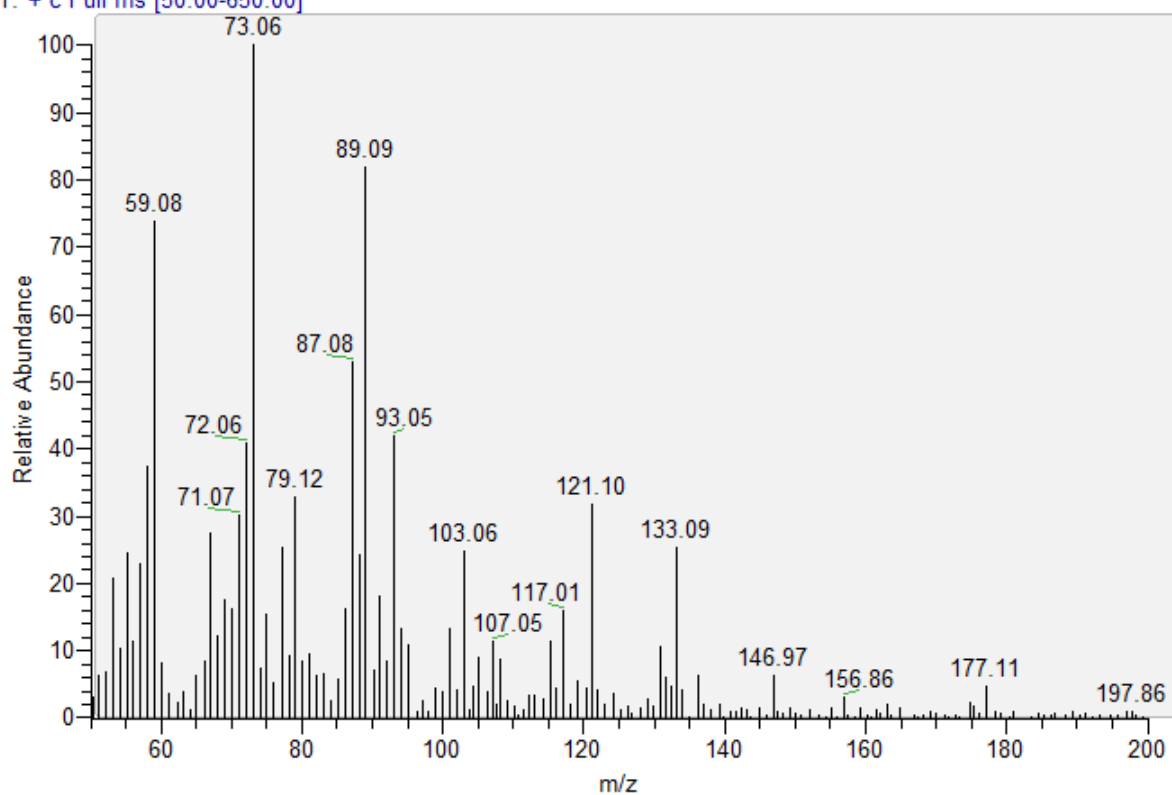

3074 #128-129 RT: 3.04-3.06 AV: 2 NL: 1.48E5  
T: + c Full ms [50.00-650.00]

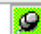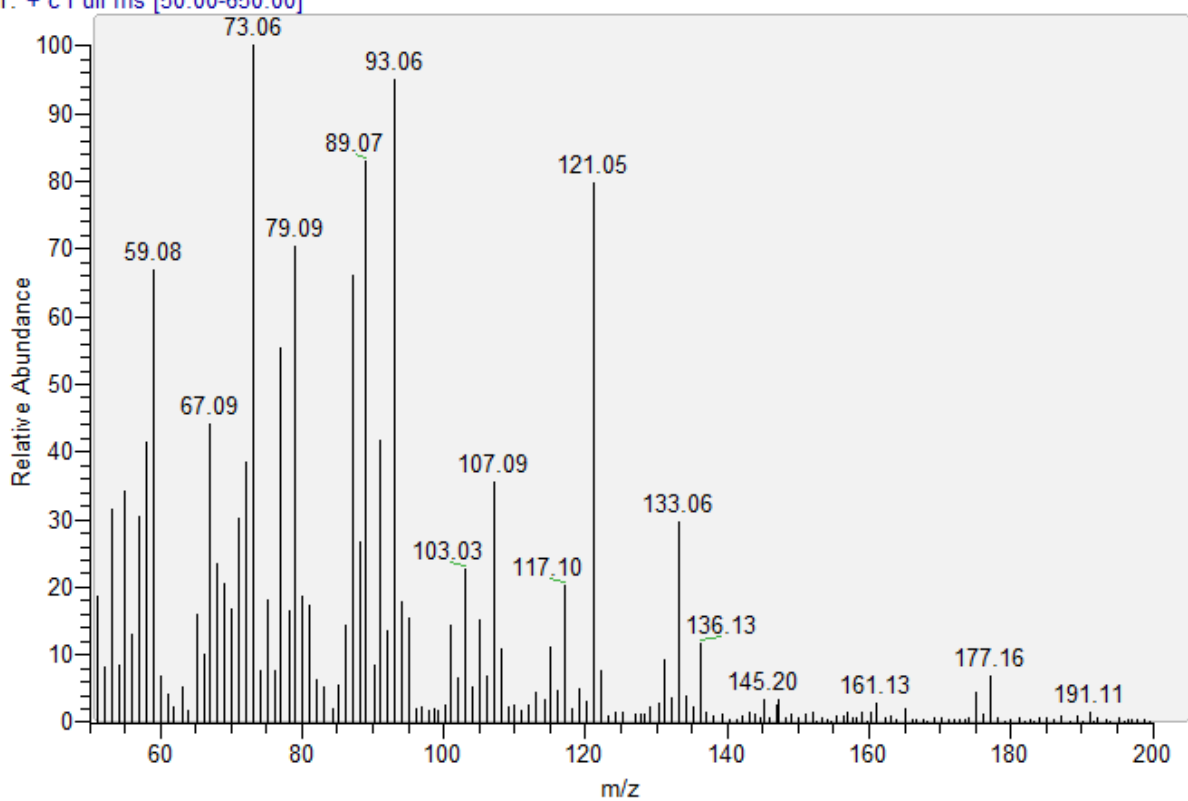

3073 #127-128 RT: 3.02-3.04 AV: 2 NL: 1.70E5

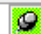

T: + c Full ms [50.00-650.00]

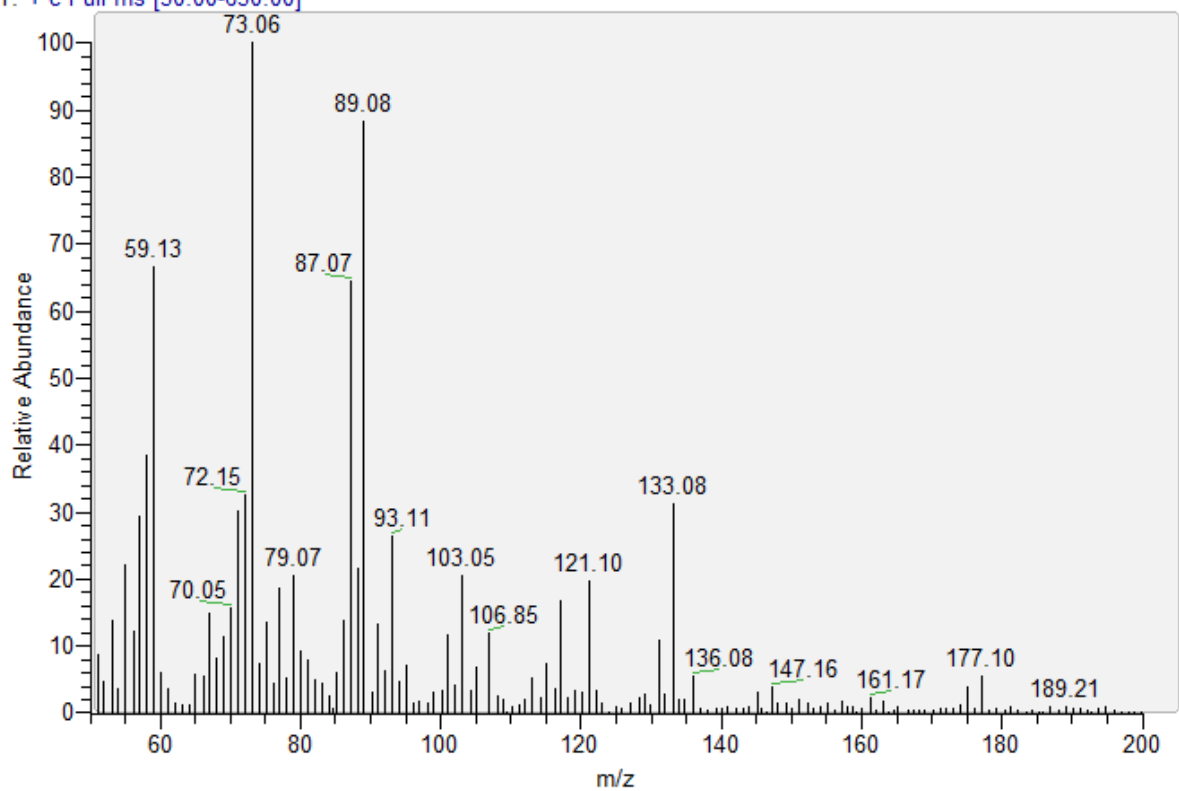

3072 #128 RT: 3.04 AV: 1 NL: 1.57E5  
T: + c Full ms [50.00-650.00]

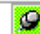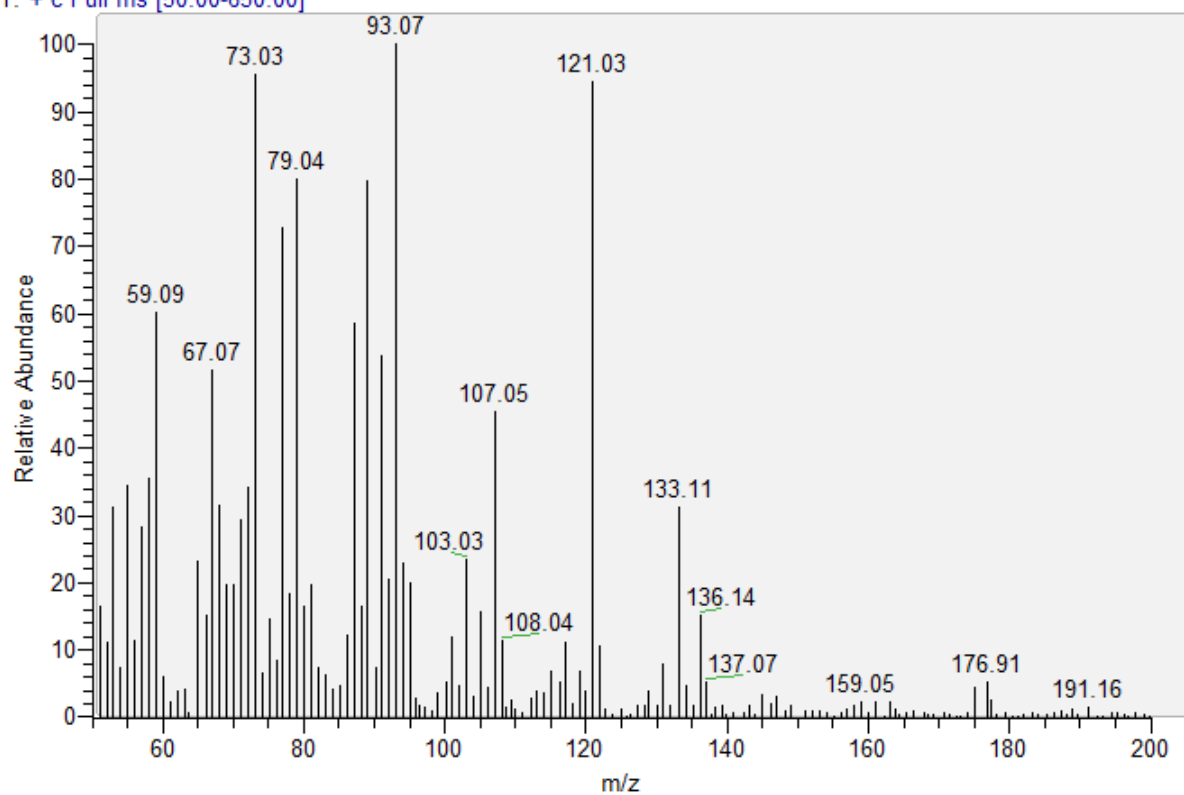

3070 #129 RT: 3.04 AV: 1 NL: 1.47E5

T: + c Full ms [50.00-650.00]

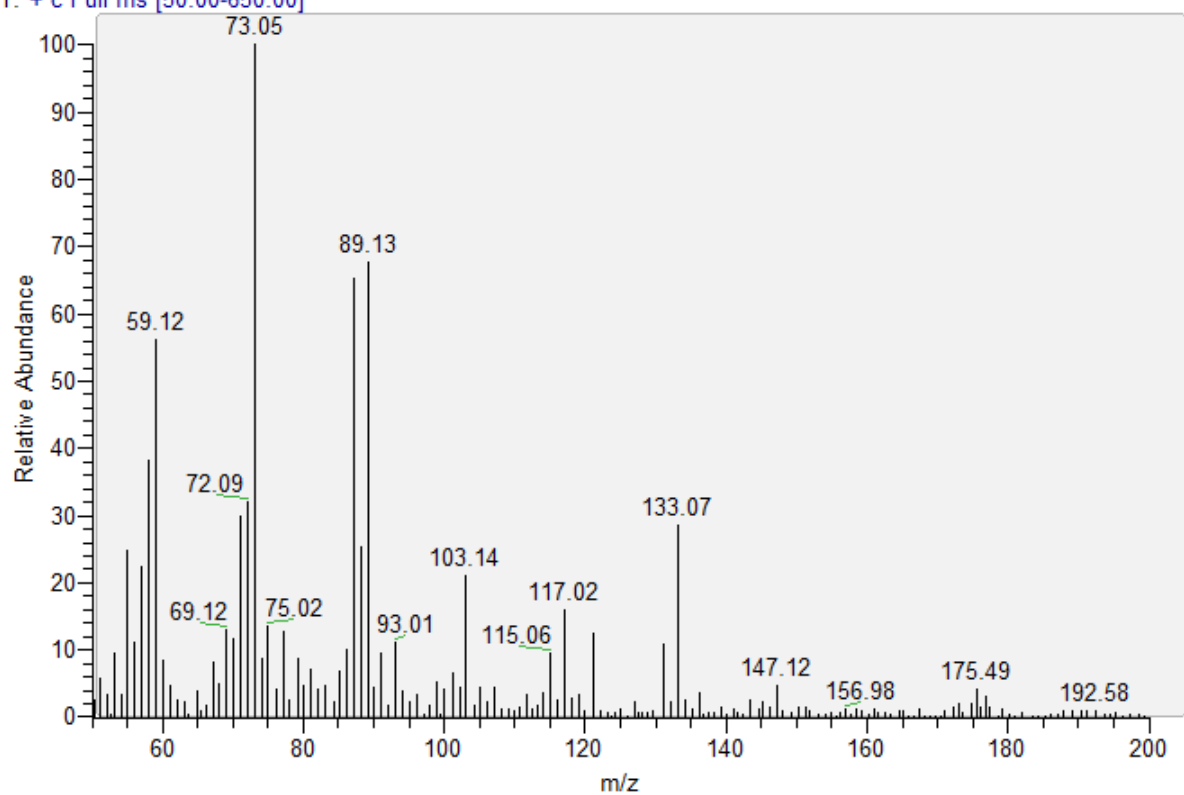



Beta Pinene:

Reference:

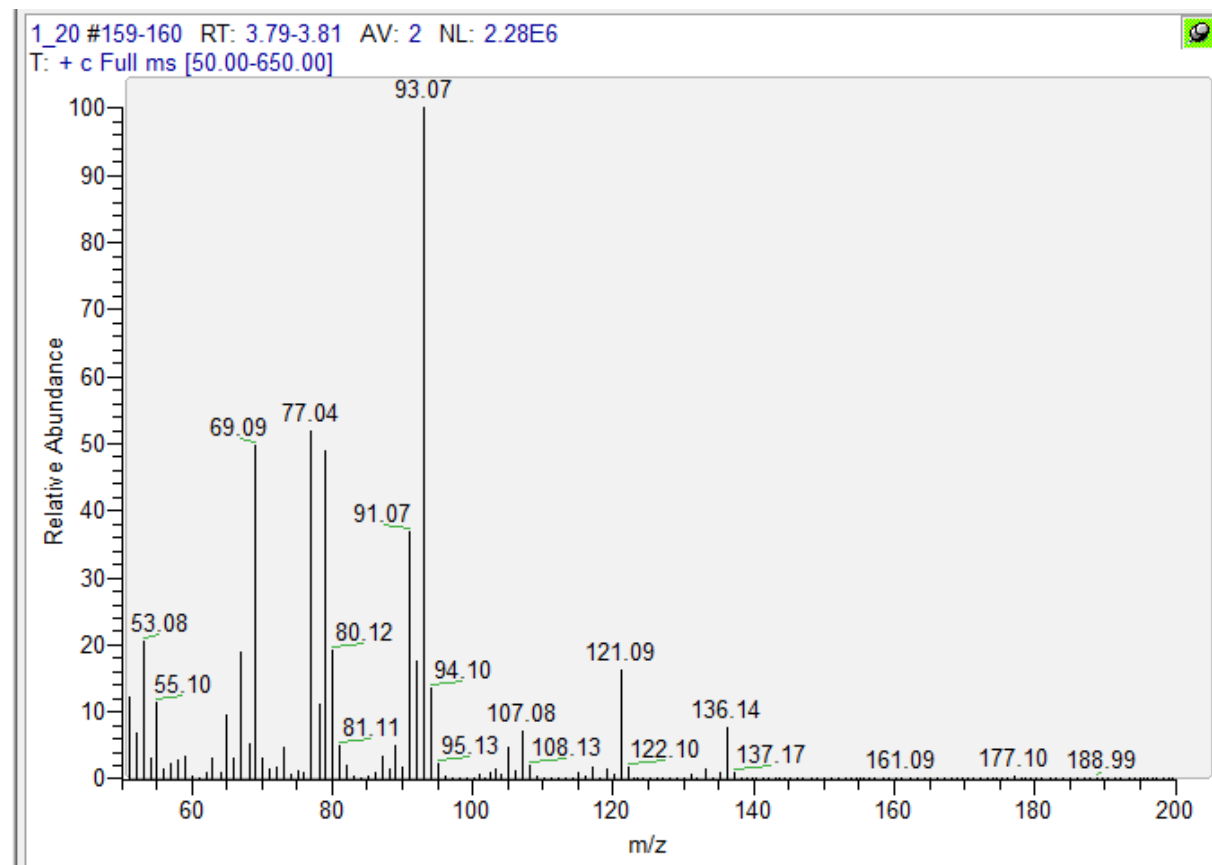

Samples:

3021 #160 RT: 3.79 AV: 1 NL: 1.05E7  
T: + c Full ms [50.00-650.00]

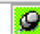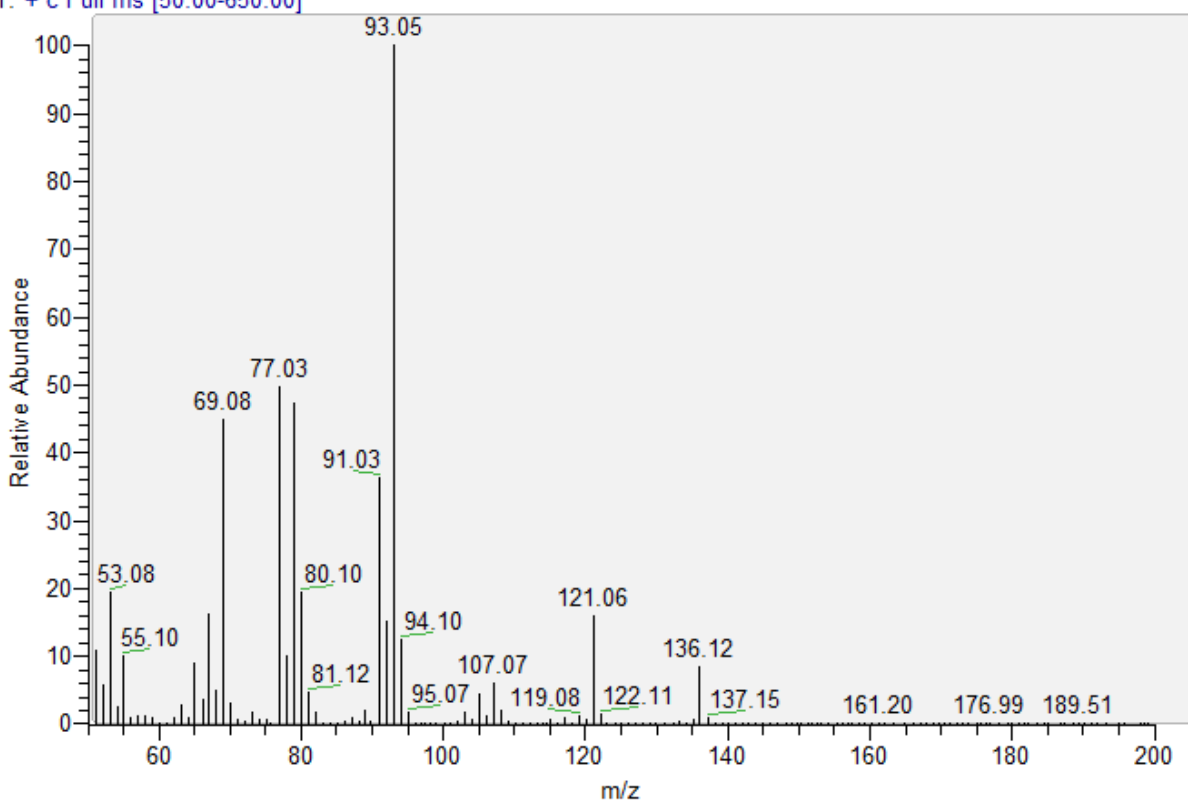

3057 #161-162 RT: 3.77-3.80 AV: 2 NL: 1.88E5  
T: + c Full ms [50.00-650.00]

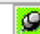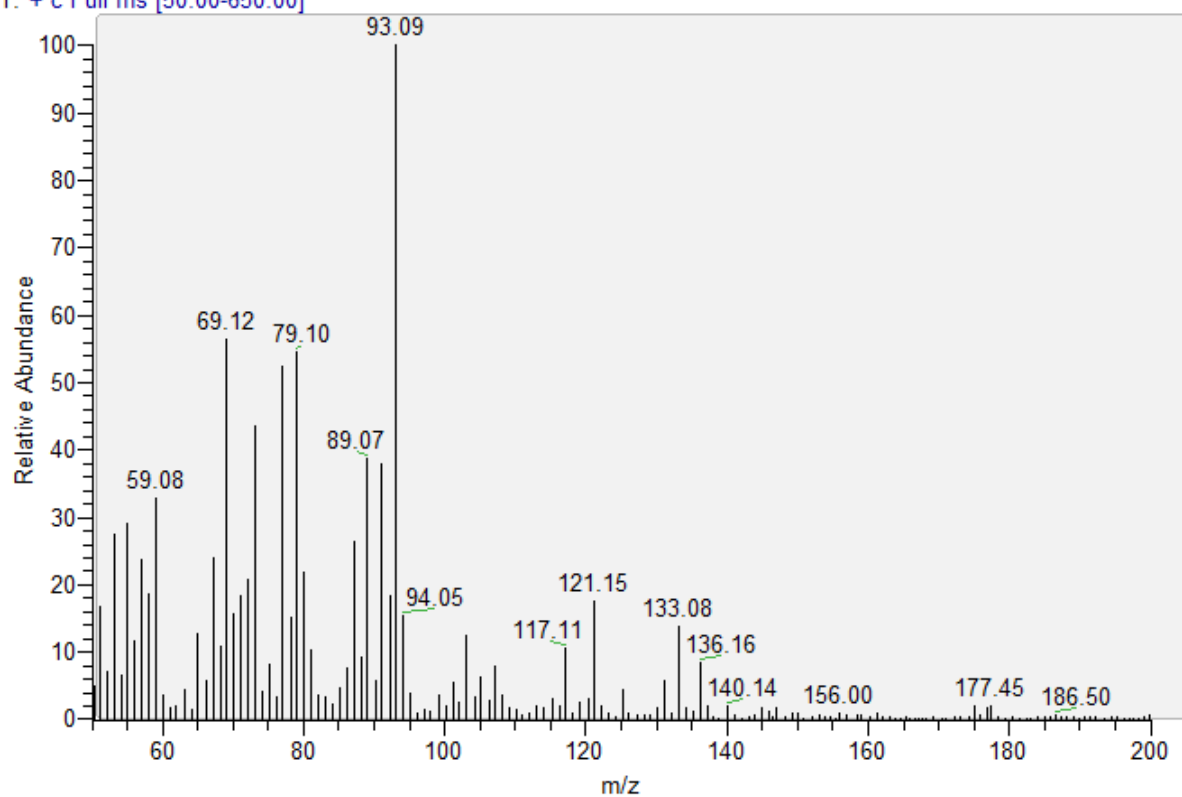

3058 #158-159 RT: 3.77-3.80 AV: 2 NL: 4.17E5  
T: + c Full ms [50.00-650.00]

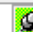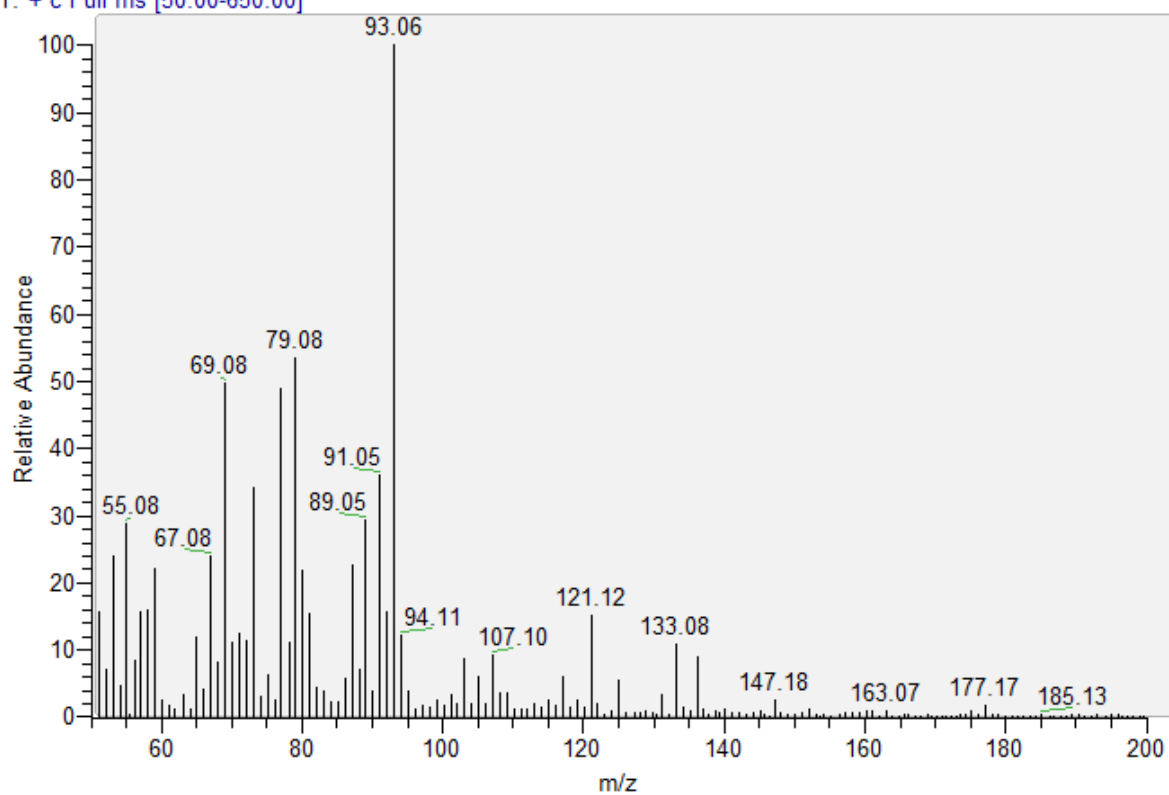

3053 #159-161 RT: 3.77-3.82 AV: 3 NL: 6.00E5  
T: + c Full ms [50.00-650.00]

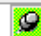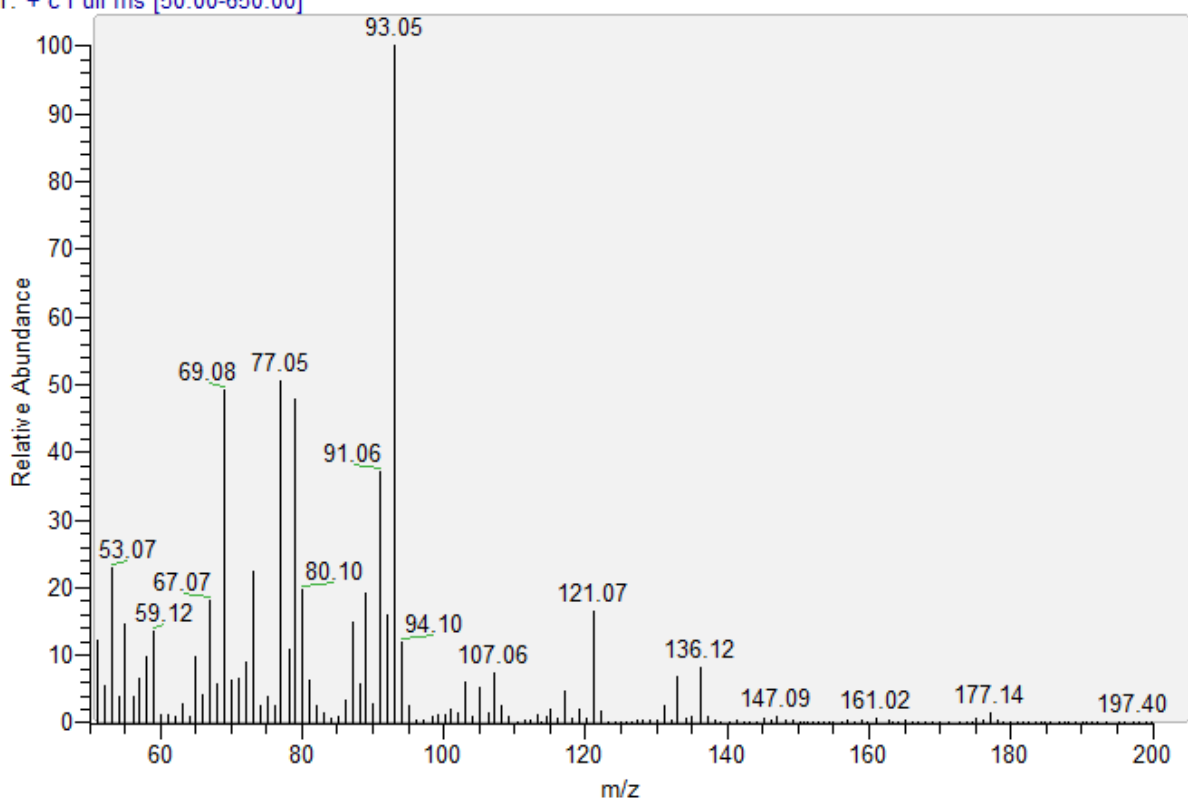

3075 #159-160 RT: 3.78-3.81 AV: 2 NL: 4.18E6  
T: + c Full ms [50.00-650.00]

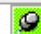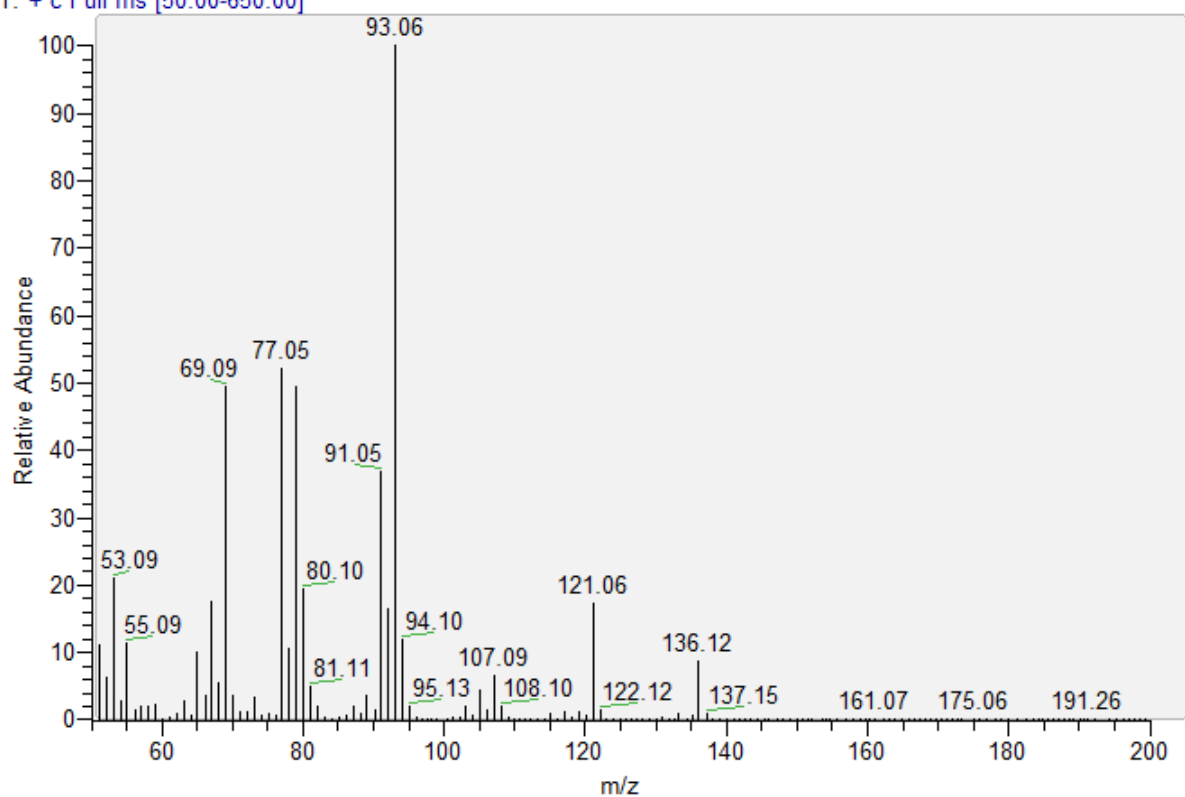

3018 #160-161 RT: 3.78-3.80 AV: 2 NL: 2.63E6  
T: + c Full ms [50.00-650.00]

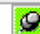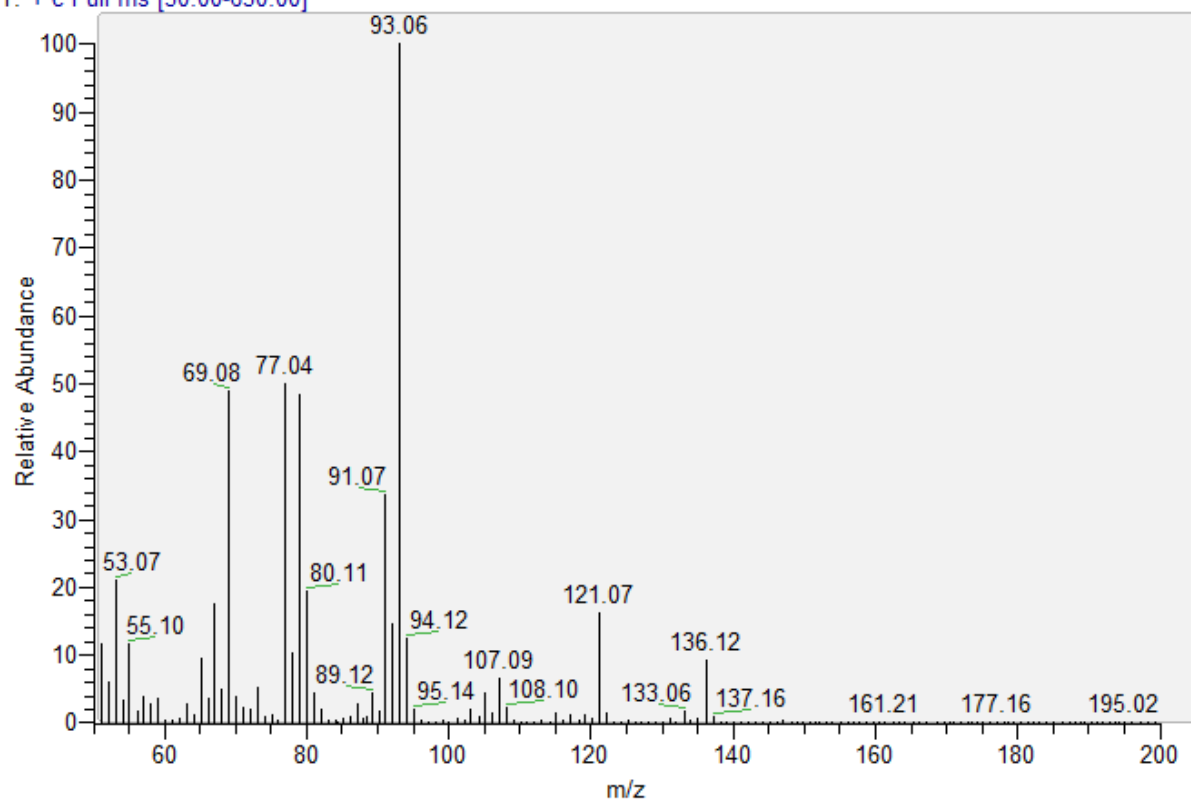



3074 #160-161 RT: 3.79-3.81 AV: 2 NL: 8.36E6  
T: + c Full ms [50.00-650.00]

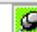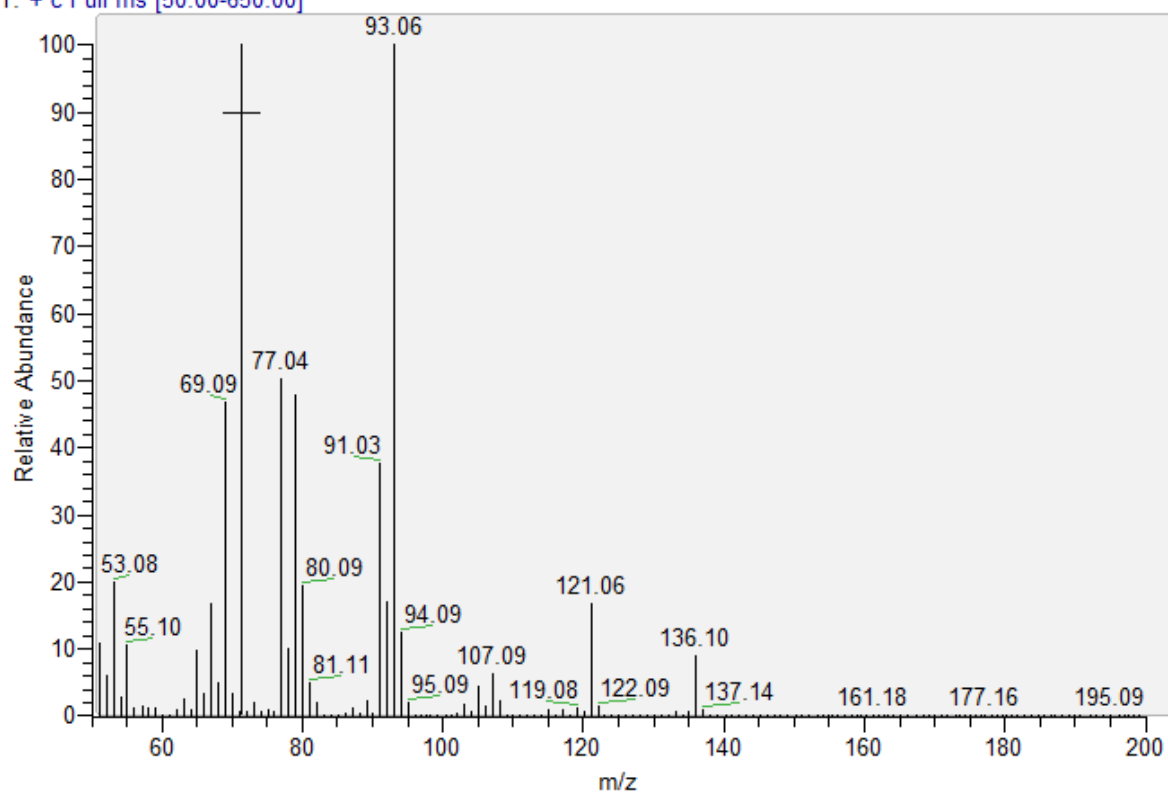

3073 #159-160 RT: 3.78-3.81 AV: 2 NL: 2.26E6  
T: + c Full ms [50.00-650.00]

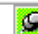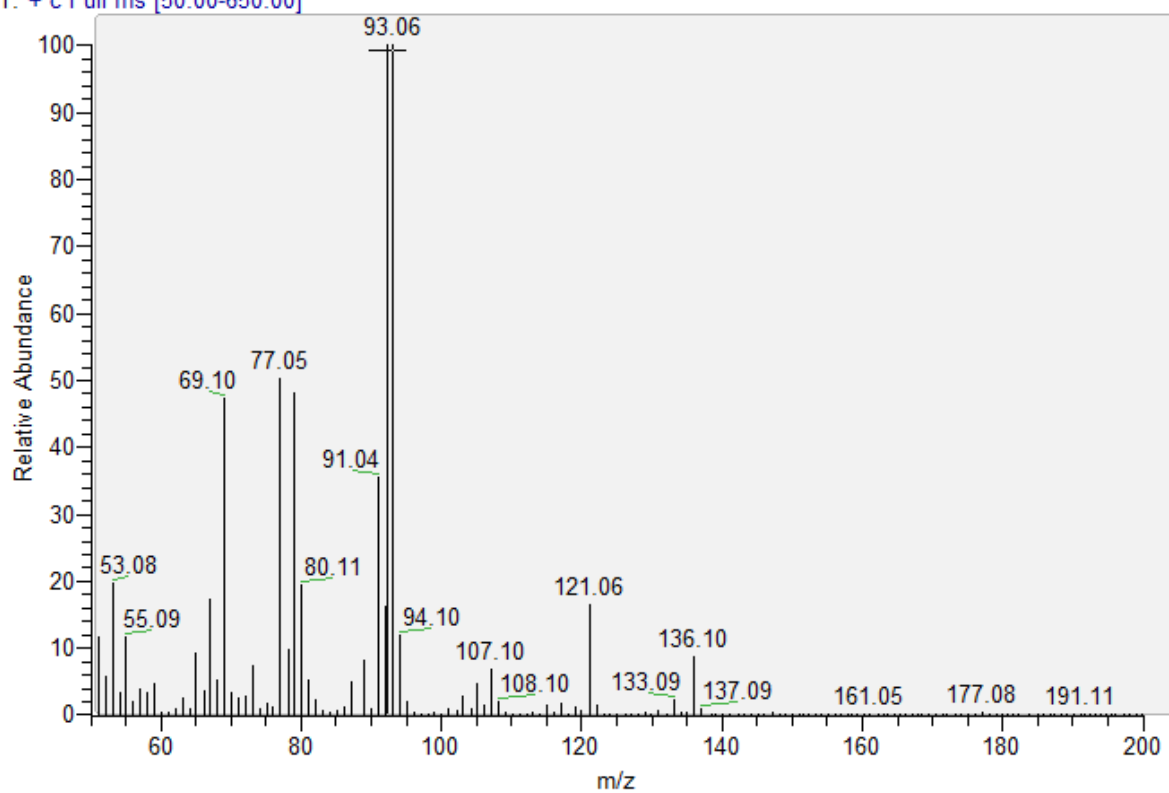

3073 #159-160 RT: 3.78-3.81 AV: 2 NL: 2.26E6  
T: + c Full ms [50.00-650.00]

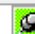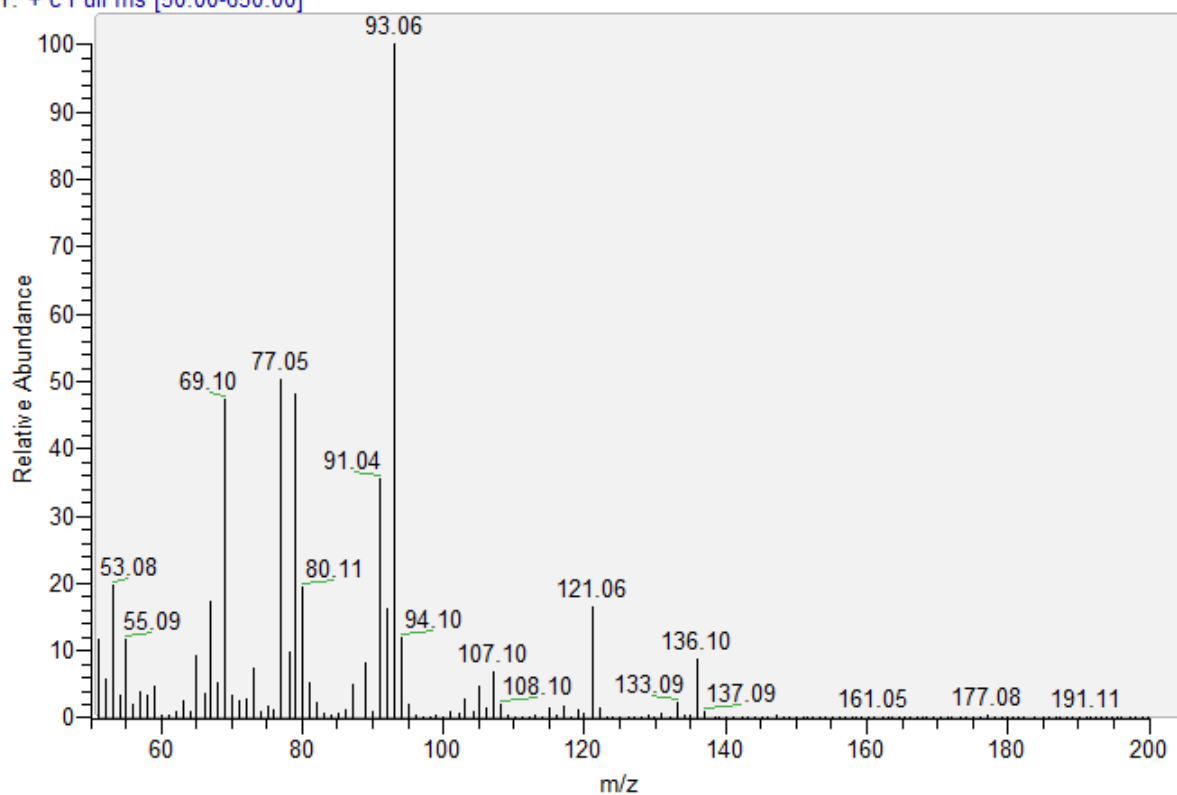

3072 #159-160 RT: 3.78-3.80 AV: 2 NL: 6.90E6  
T: + c Full ms [50.00-650.00]

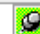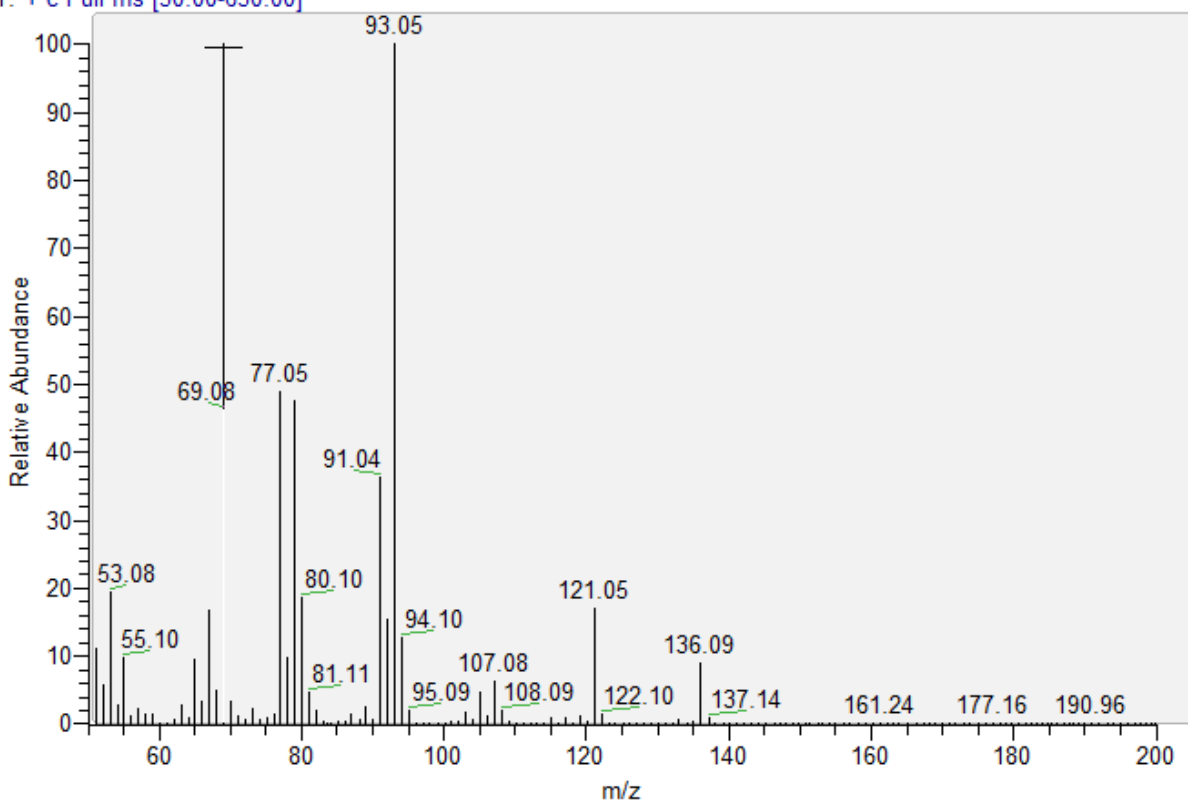

3070 #160-161 RT: 3.78-3.80 AV: 2 NL: 7.94E5  
T: + c Full ms [50.00-650.00]

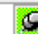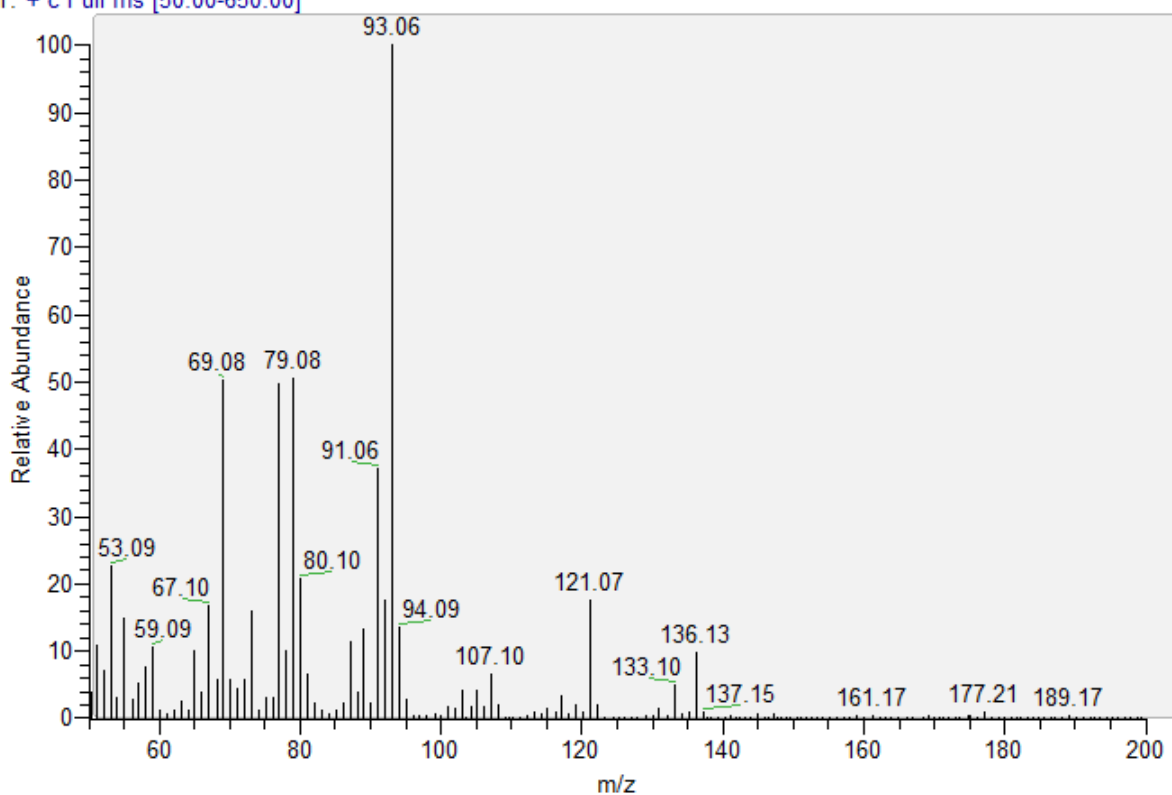

# Alpha Terpinene

Reference:

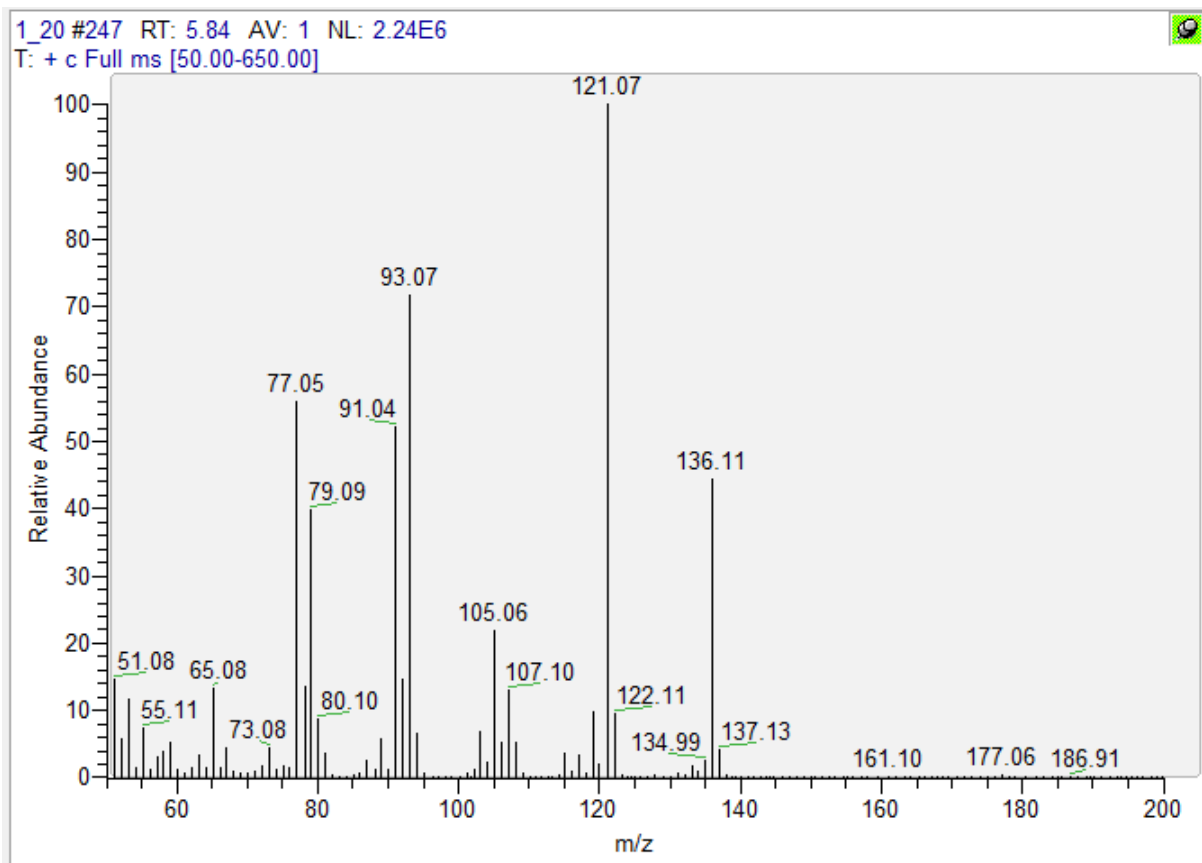

Samples:

3021 #246 RT: 5.83 AV: 1 NL: 2.27E5  
T: + c Full ms [50.00-650.00]

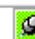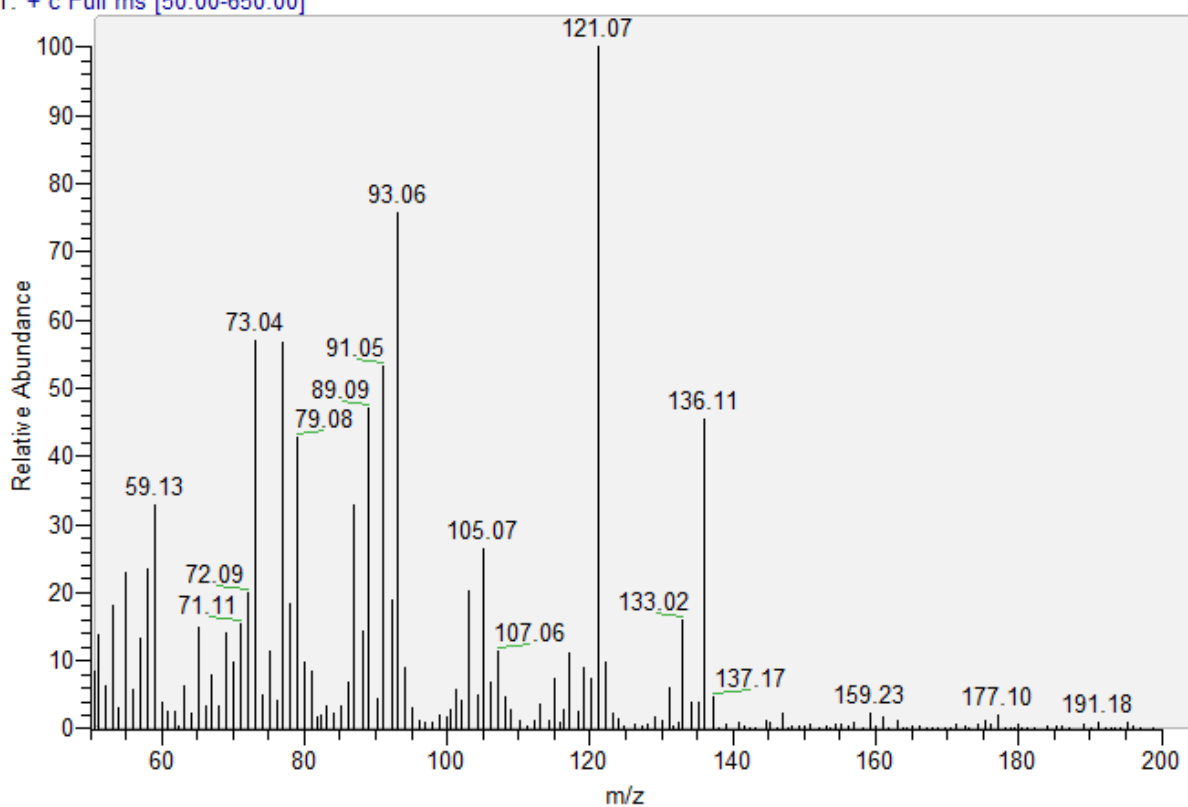



3057 #247-248 RT: 5.81-5.83 AV: 2 NL: 1.79E5  
T: + c Full ms [50.00-650.00]

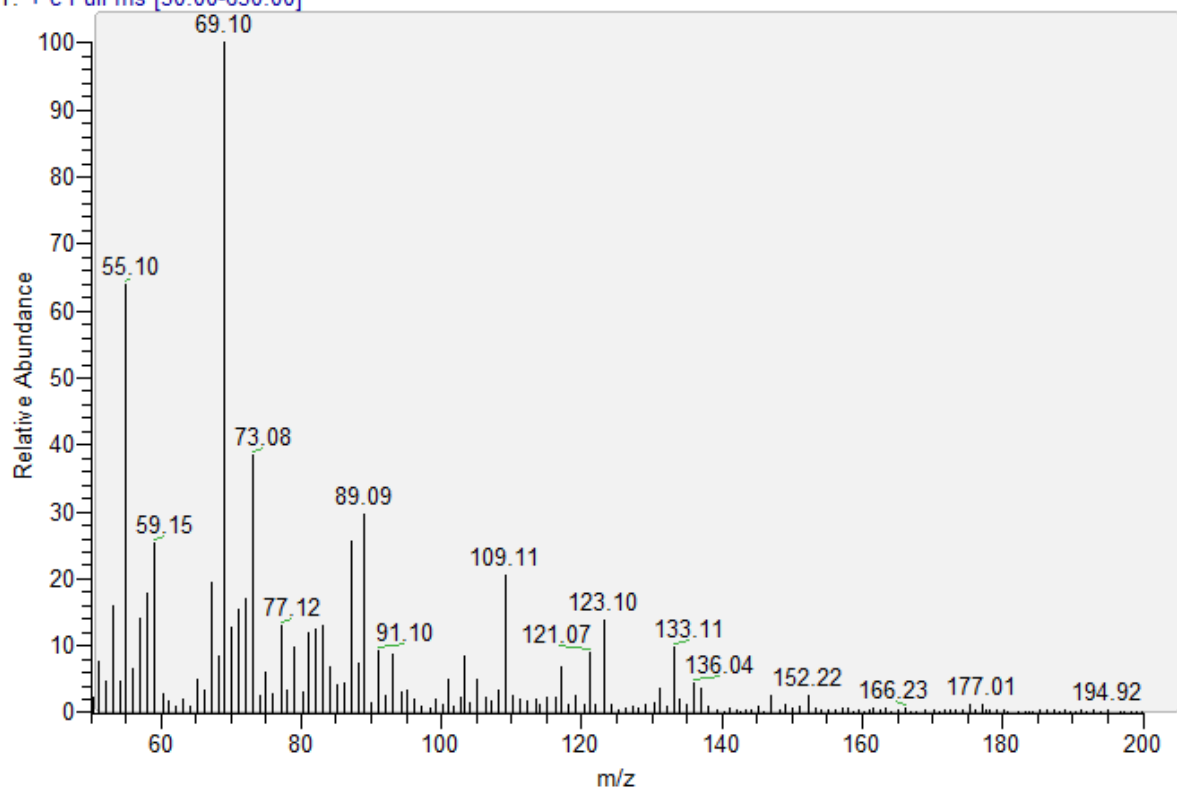

3058 #244 RT: 5.82 AV: 1 NL: 3.80E5  
T: + c Full ms [50.00-650.00]

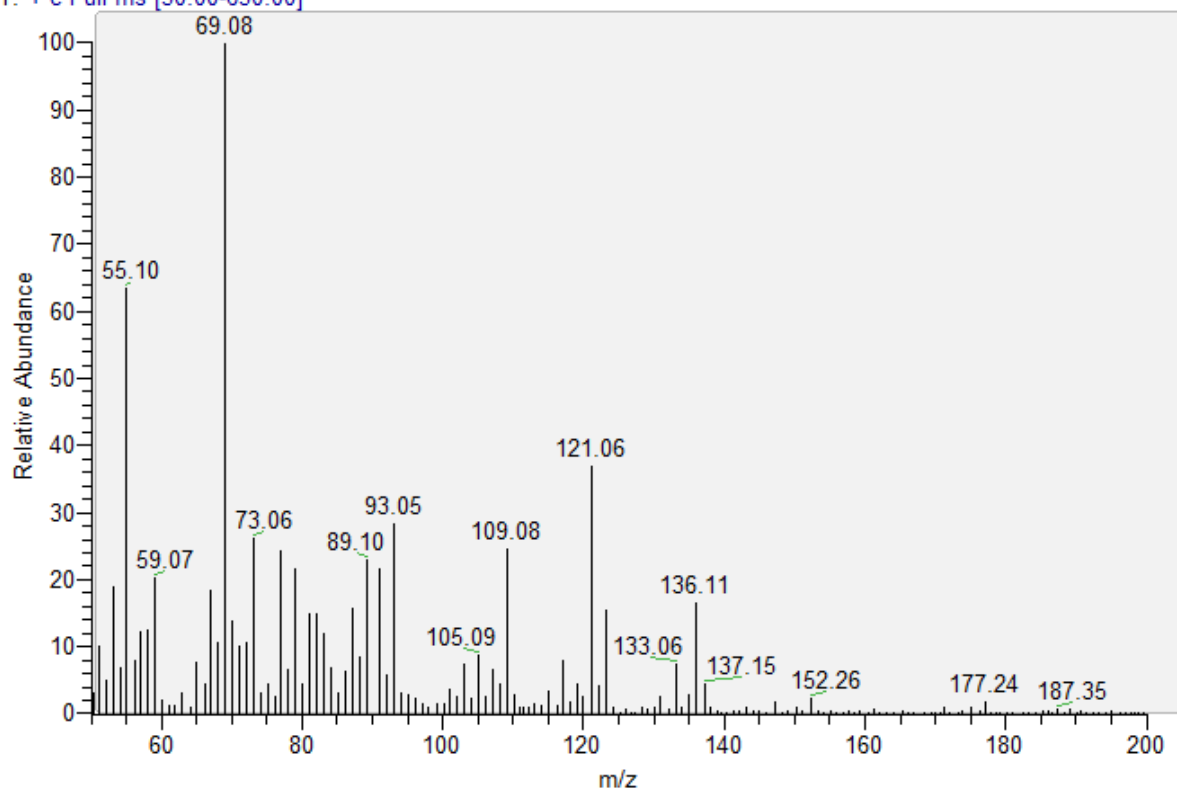

3053 #245-246 RT: 5.82-5.84 AV: 2 NL: 1.15E5  
T: + c Full ms [50.00-650.00]

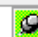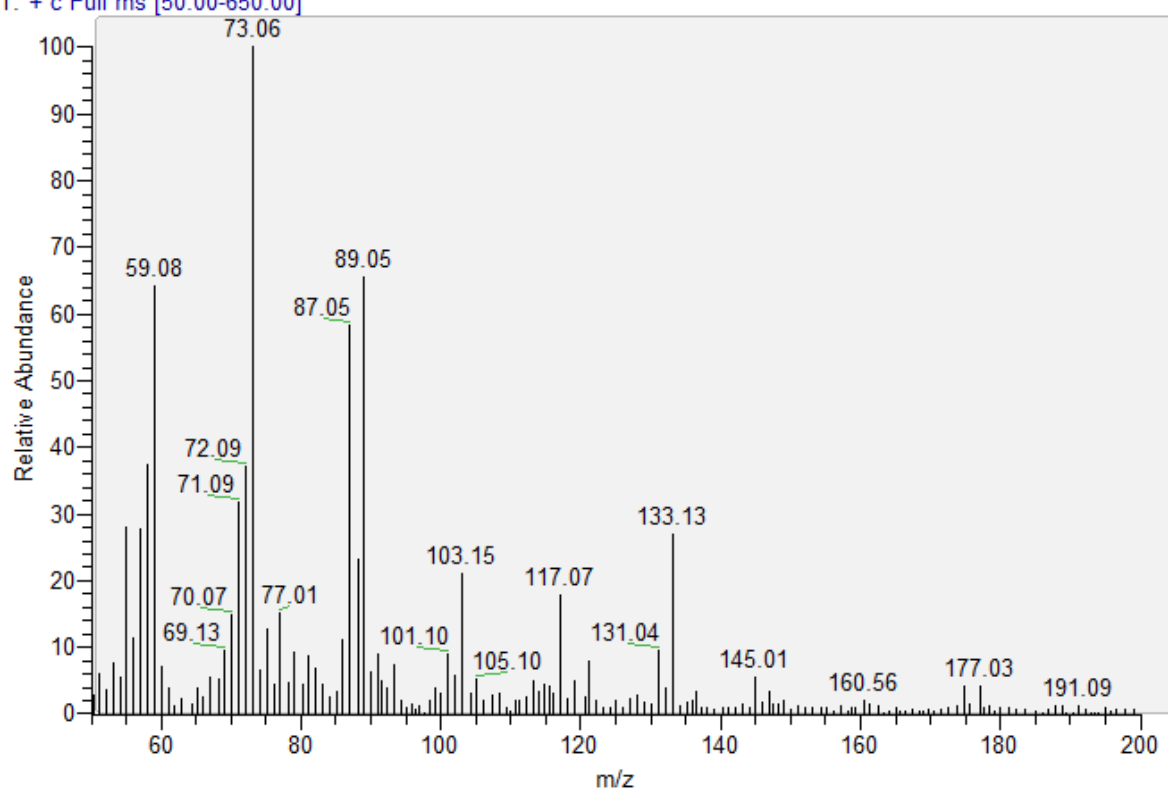

3075 #245-246 RT: 5.83-5.85 AV: 2 NL: 4.08E5  
T: + c Full ms [50.00-650.00]

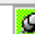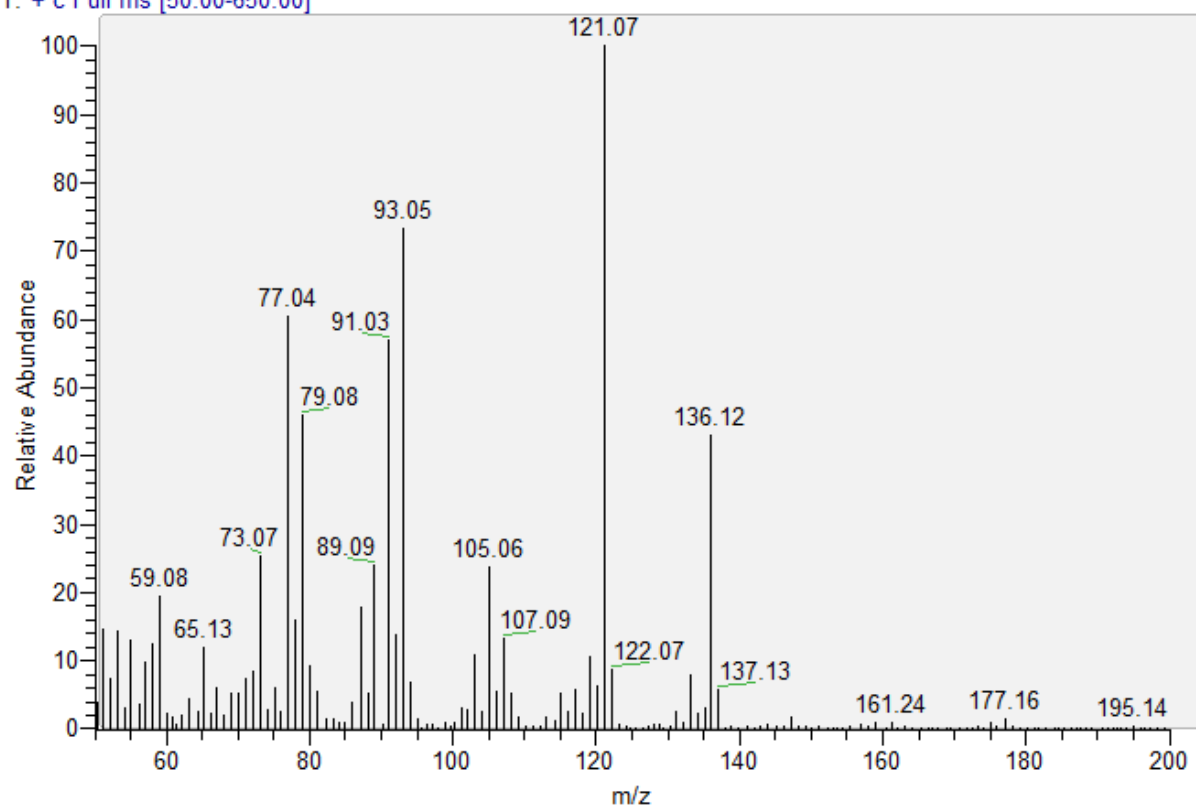

3018 #246-247 RT: 5.82-5.84 AV: 2 NL: 1.02E5

T: + c Full ms [50.00-650.00]

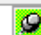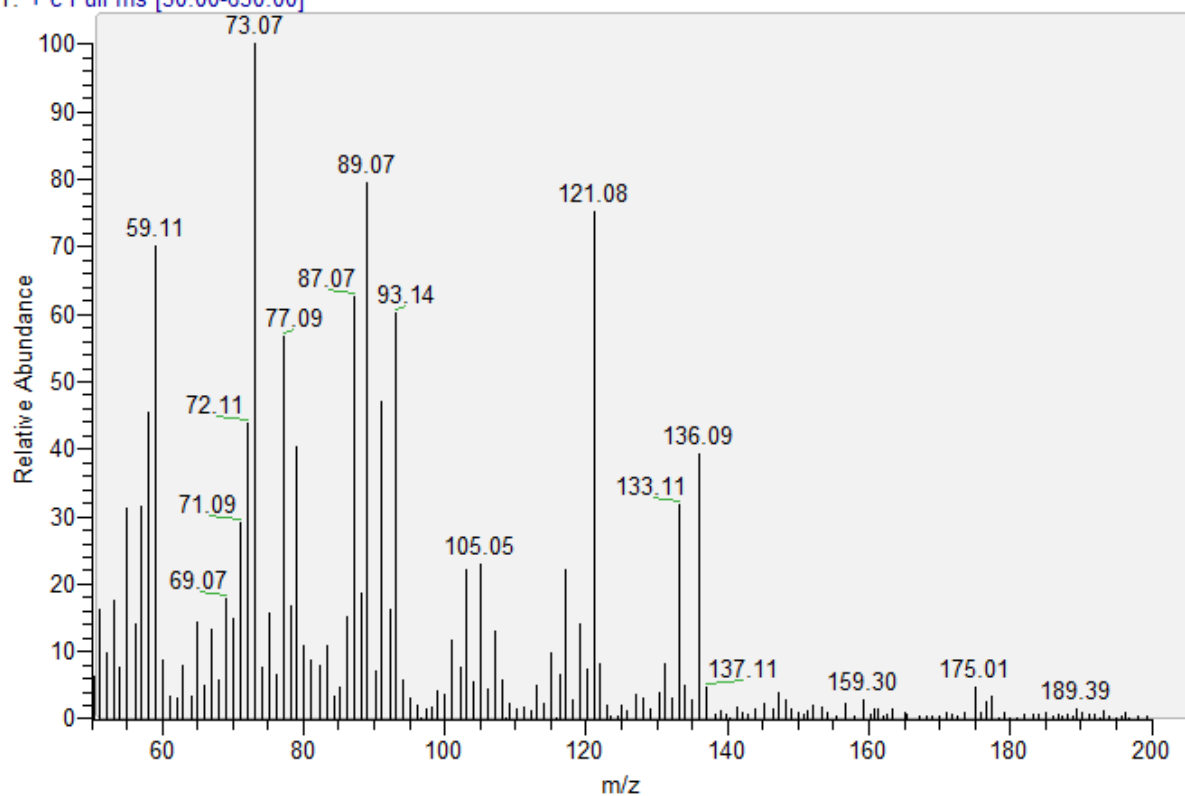

3074 #246-247 RT: 5.83-5.85 AV: 2 NL: 7.56E5  
T: + c Full ms [50.00-650.00]

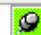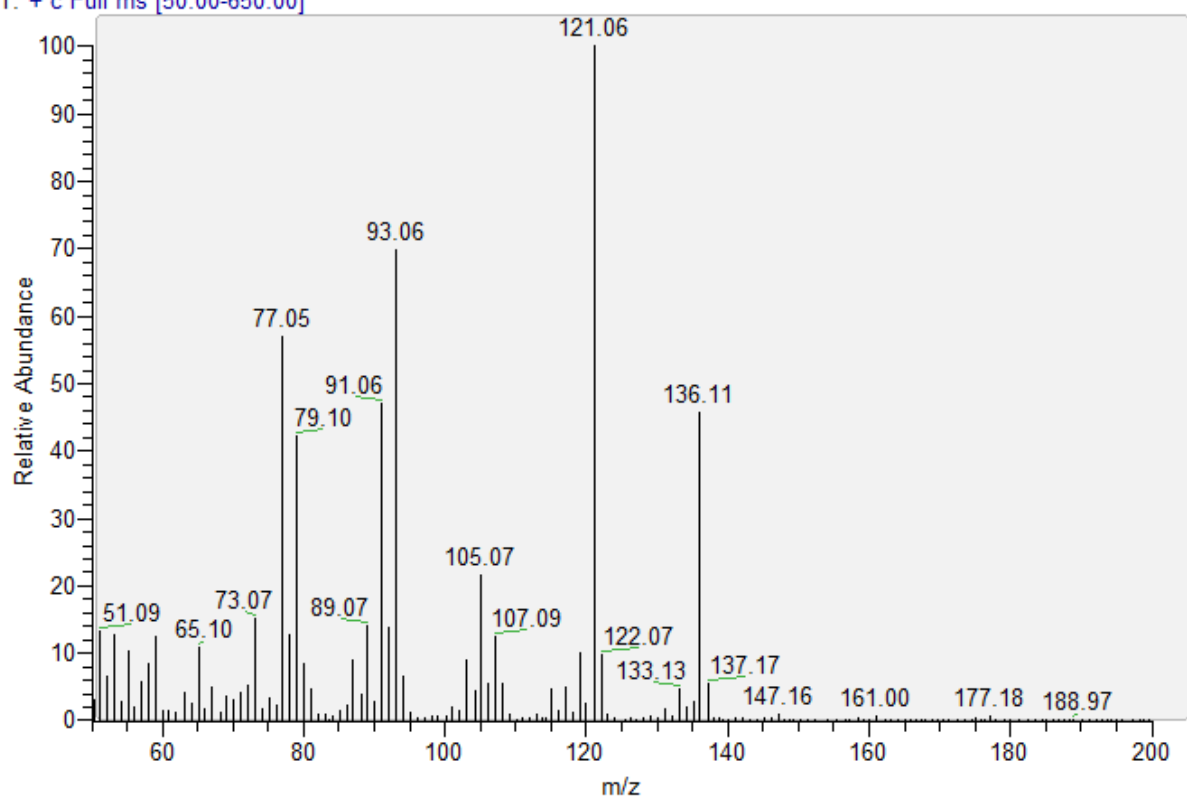

3073 #245 RT: 5.83 AV: 1 NL: 1.23E5

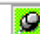

T: + c Full ms [50.00-650.00]

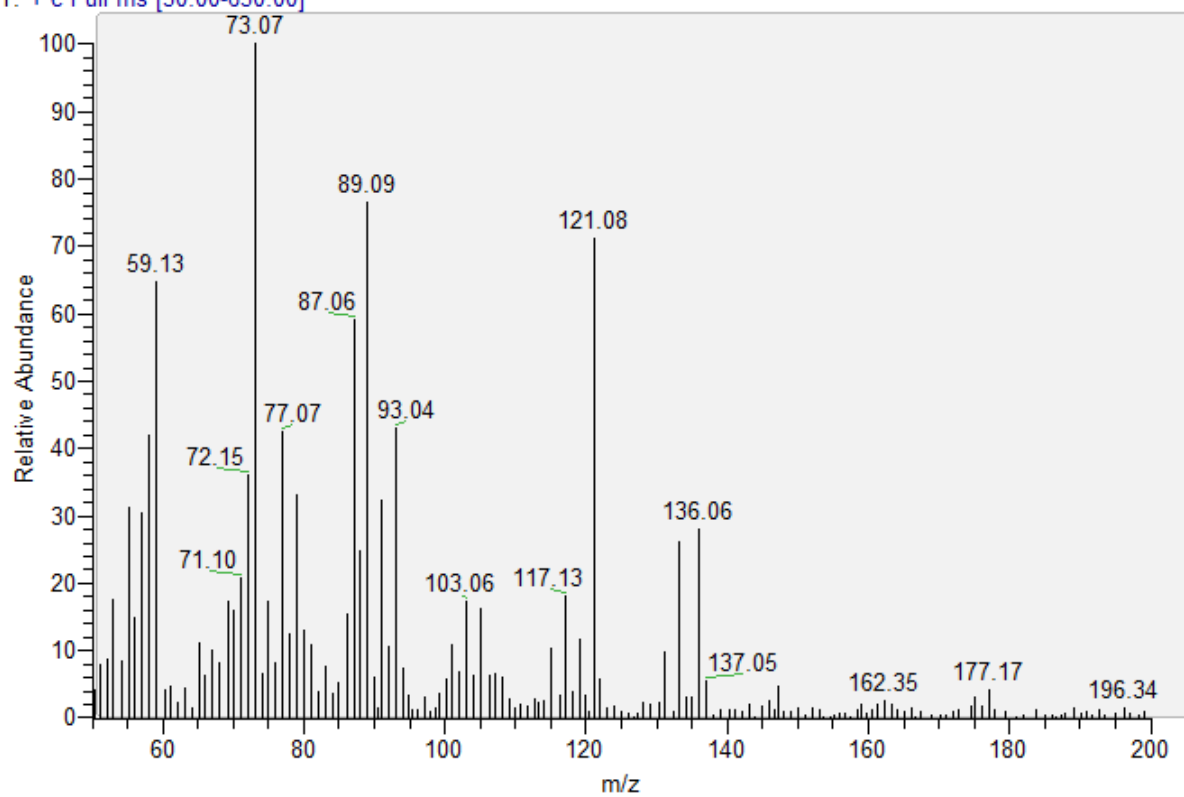

3073 #245 RT: 5.83 AV: 1 NL: 1.23E5  
T: + c Full ms [50.00-650.00]

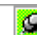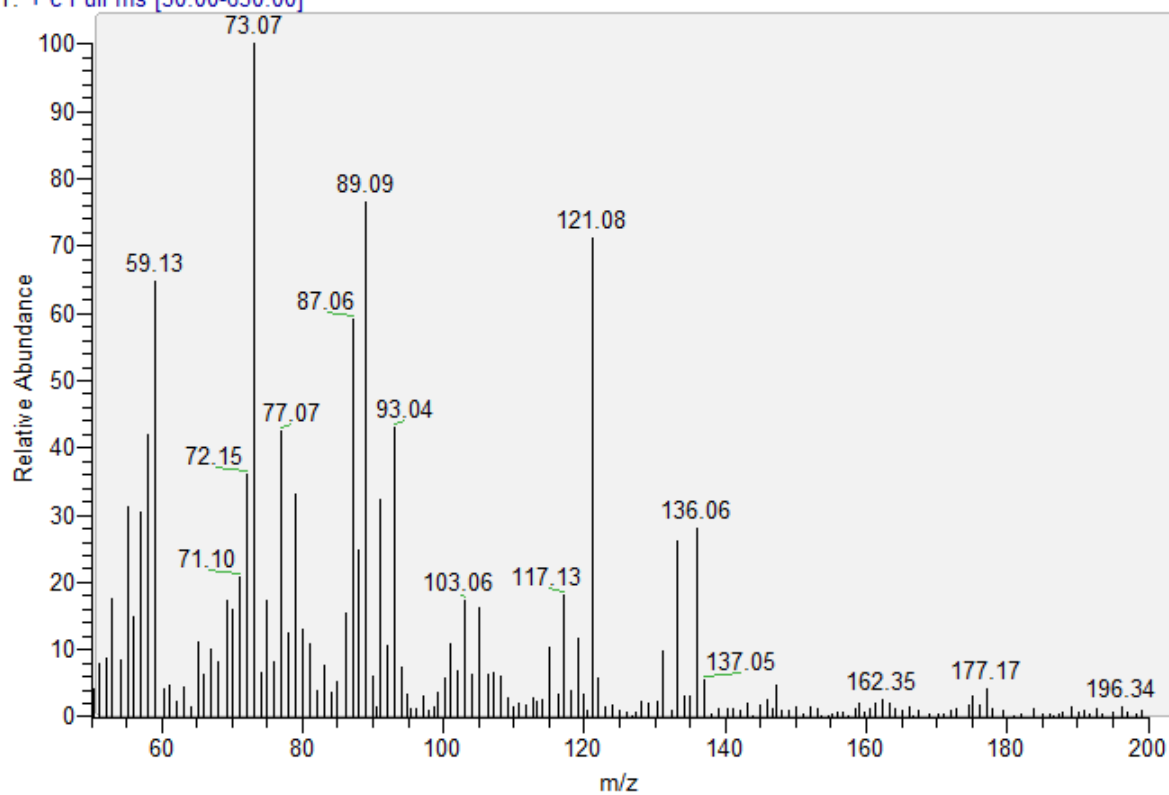

3072 #245-246 RT: 5.83-5.85 AV: 2 NL: 5.15E5  
T: + c Full ms [50.00-650.00]

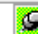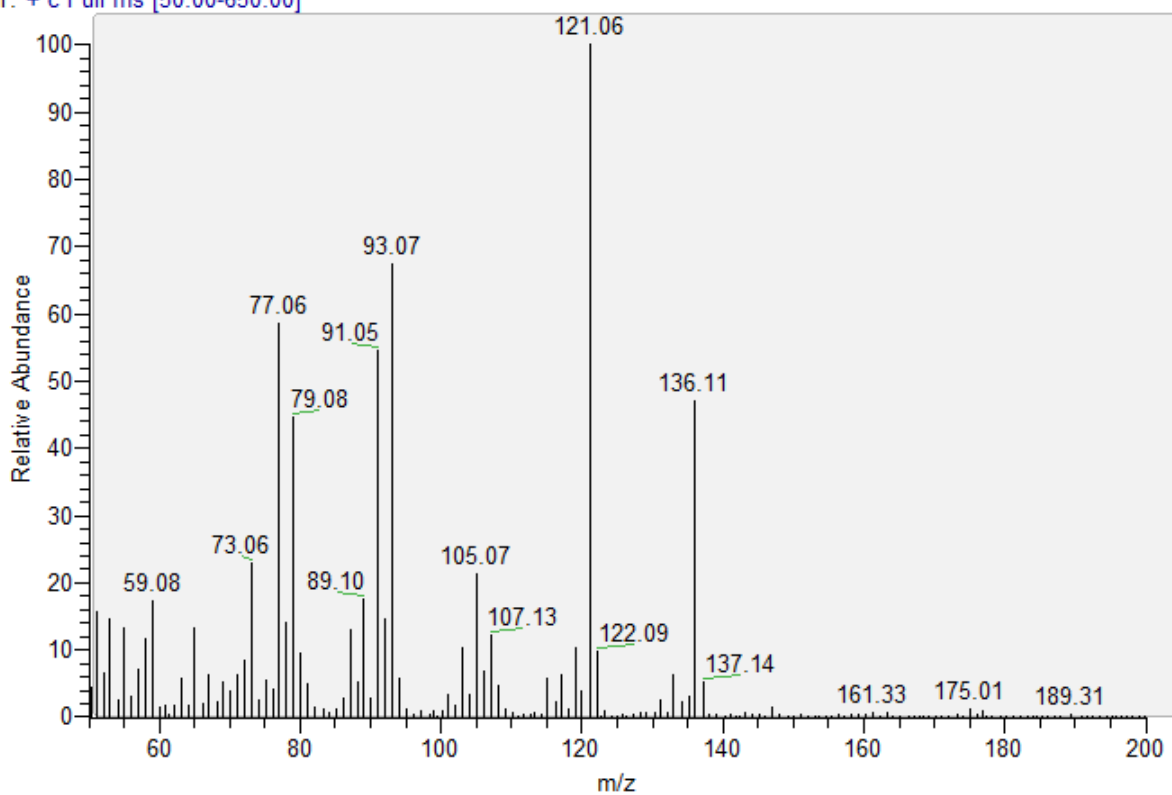



3070 #246 RT: 5.83 AV: 1 NL: 1.17E5  
T: + c Full ms [50.00-650.00]

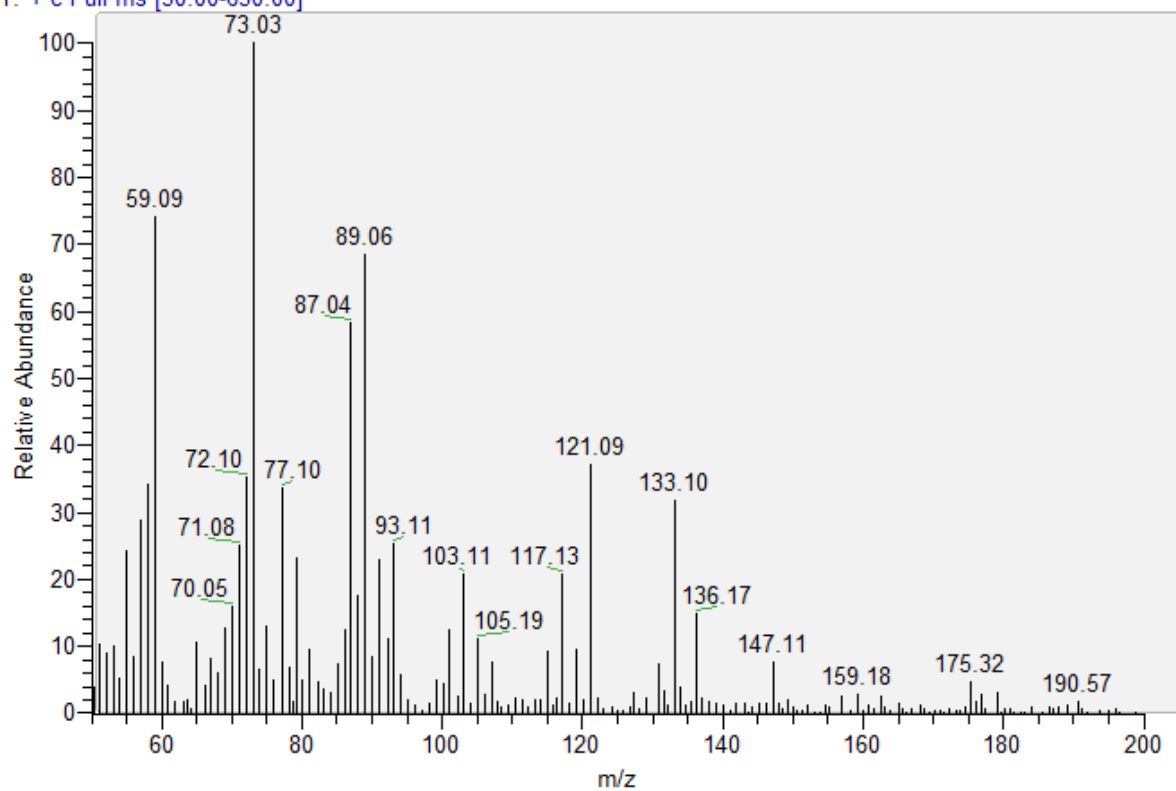

Limonene

Reference:

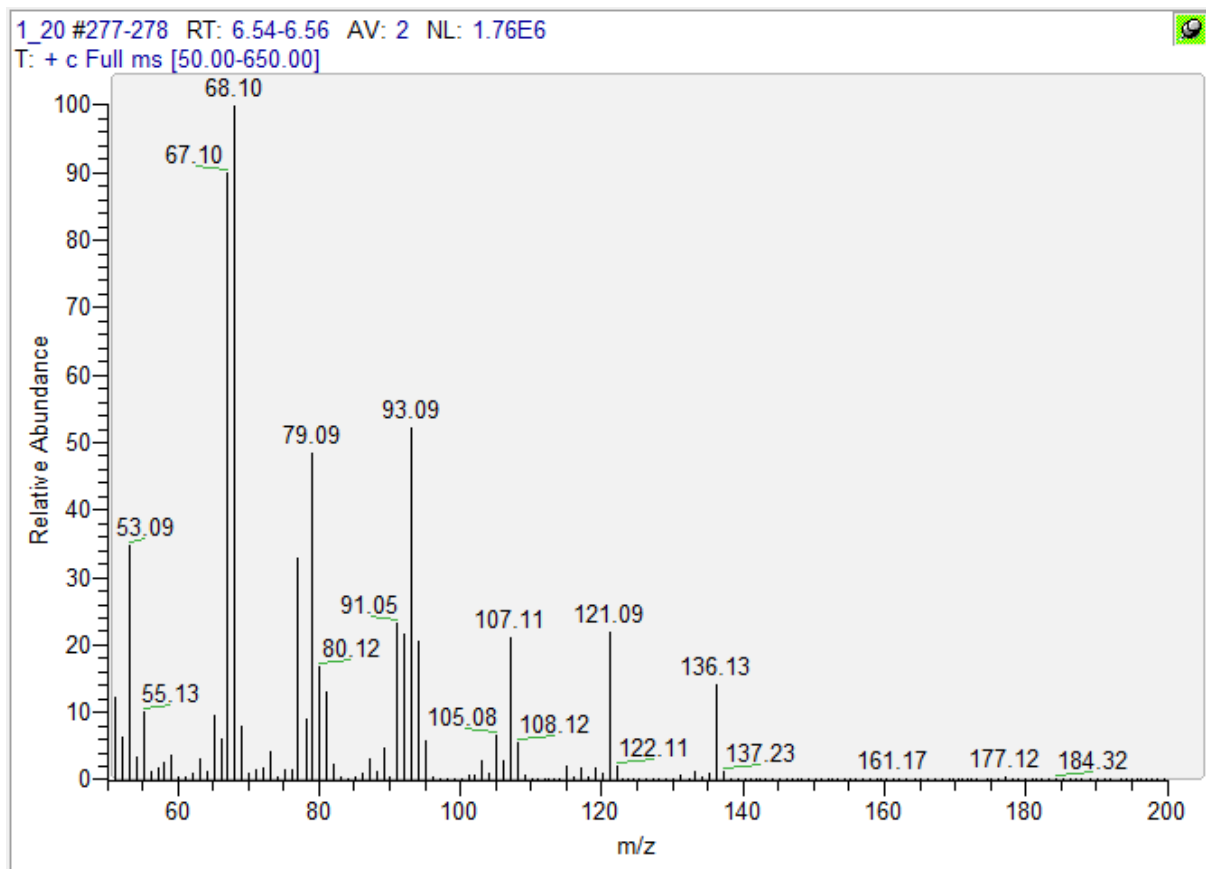

Samples:

3021 #276-277 RT: 6.55-6.57 AV: 2 NL: 1.12E6

T: + c Full ms [50.00-650.00]

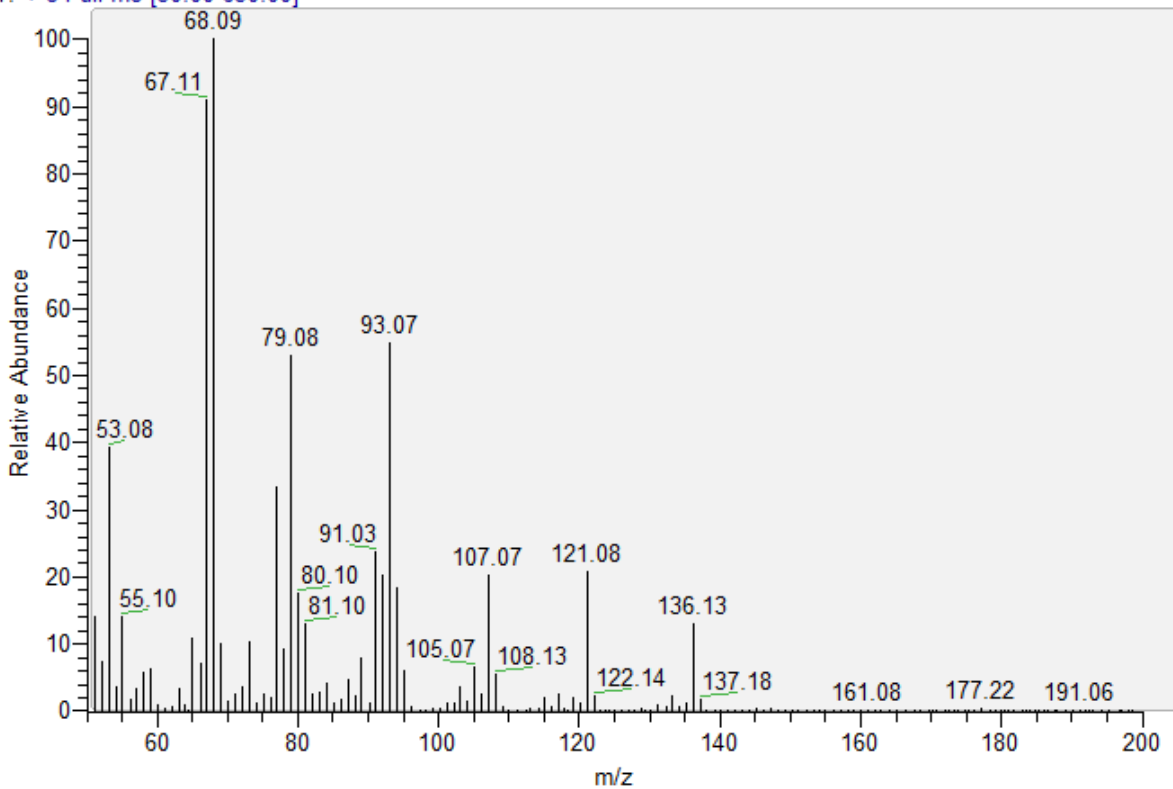

3057 #278-279 RT: 6.54-6.57 AV: 2 NL: 2.36E6  
T: + c Full ms [50.00-650.00]

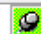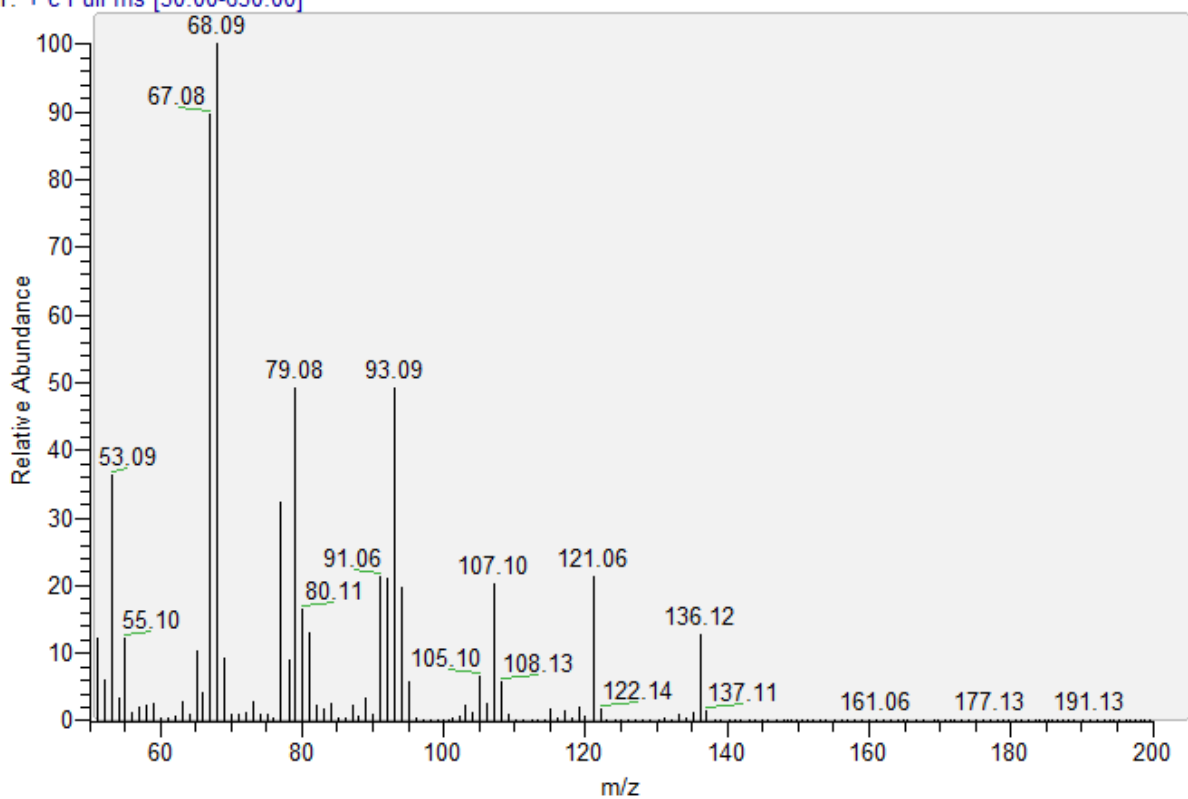

3058 #274-276 RT: 6.53-6.58 AV: 3 NL: 3.86E6  
T: + c Full ms [50.00-650.00]

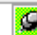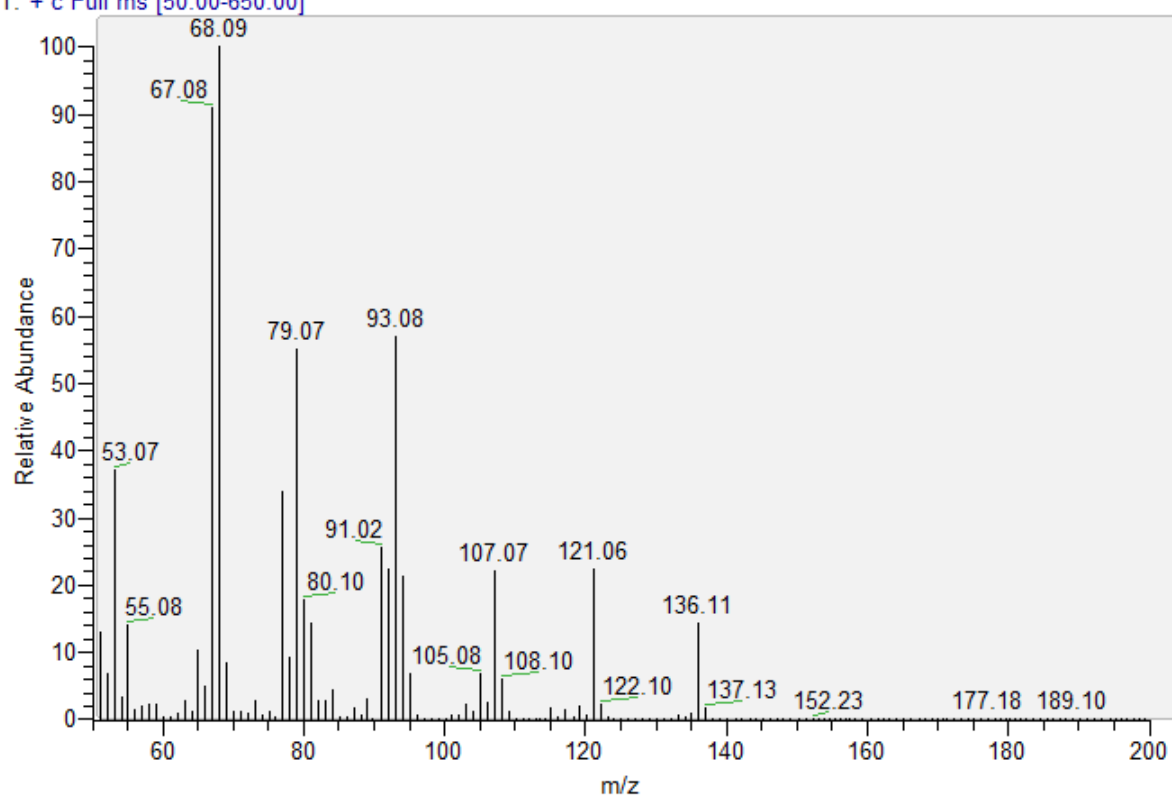

3053 #275-277 RT: 6.53-6.58 AV: 3 NL: 7.05E5  
T: + c Full ms [50.00-650.00]

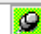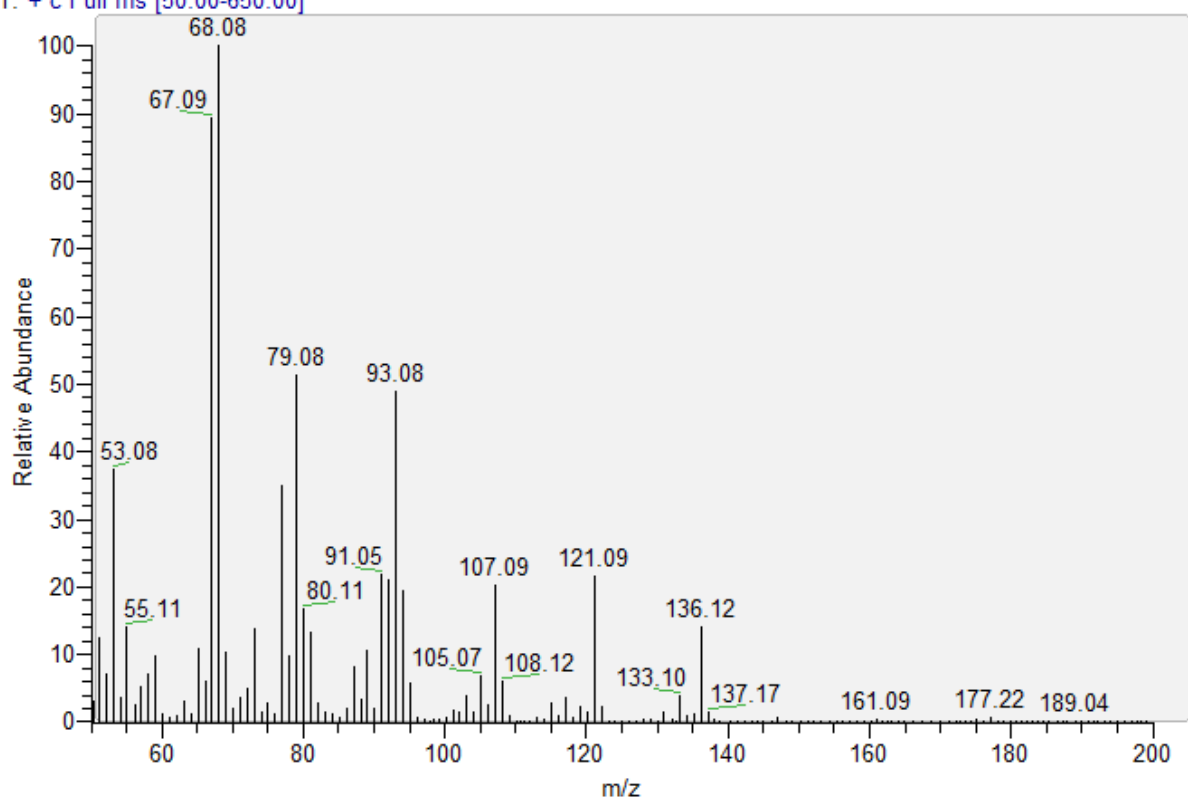

3018 #277-278 RT: 6.55-6.58 AV: 2 NL: 4.80E5

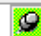

T: + c Full ms [50.00-650.00]

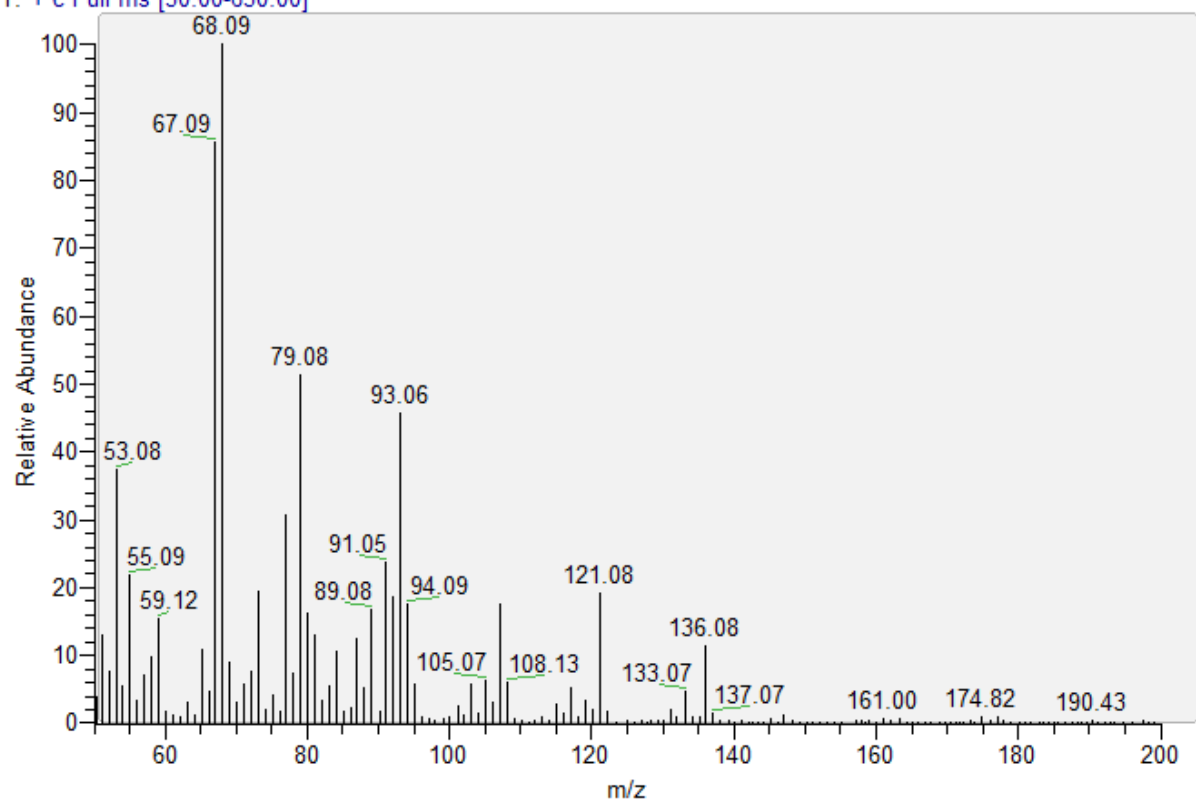

3075 #275-276 RT: 6.54-6.56 AV: 2 NL: 7.69E5  
T: + c Full ms [50.00-650.00]

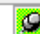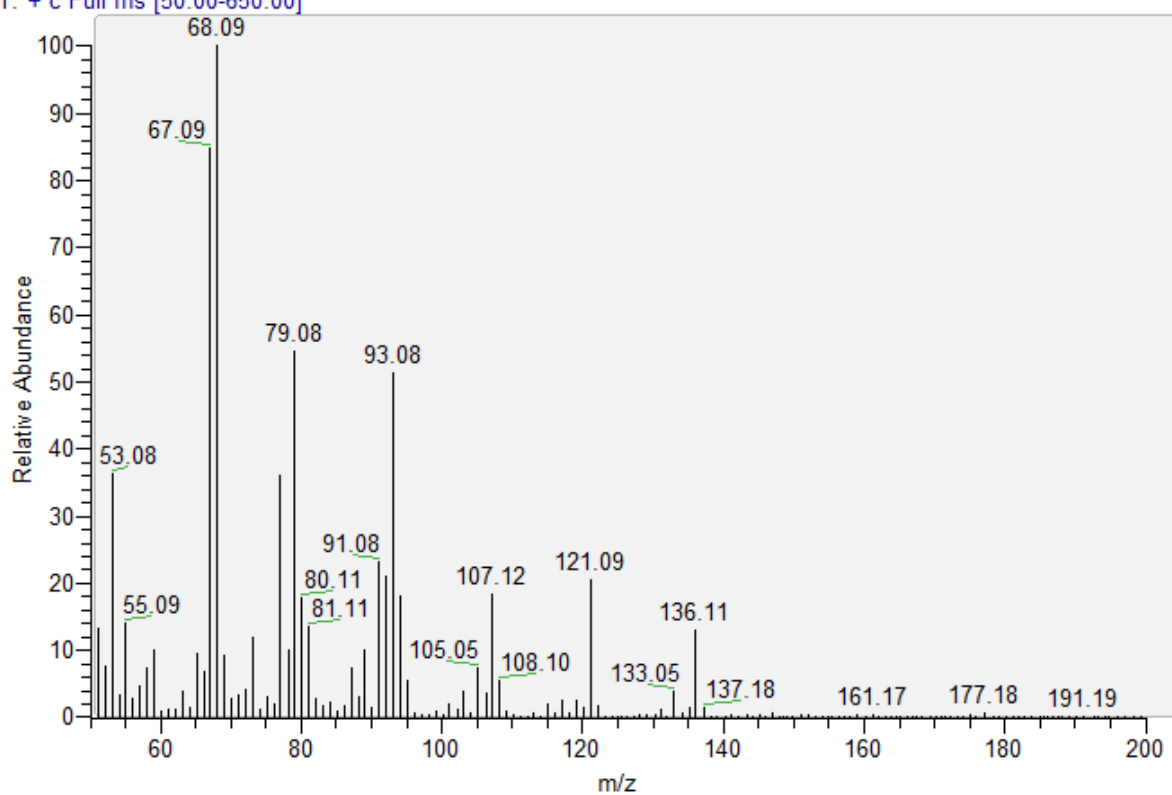



3074 #276-277 RT: 6.54-6.56 AV: 2 NL: 1.40E6  
T: + c Full ms [50.00-650.00]

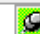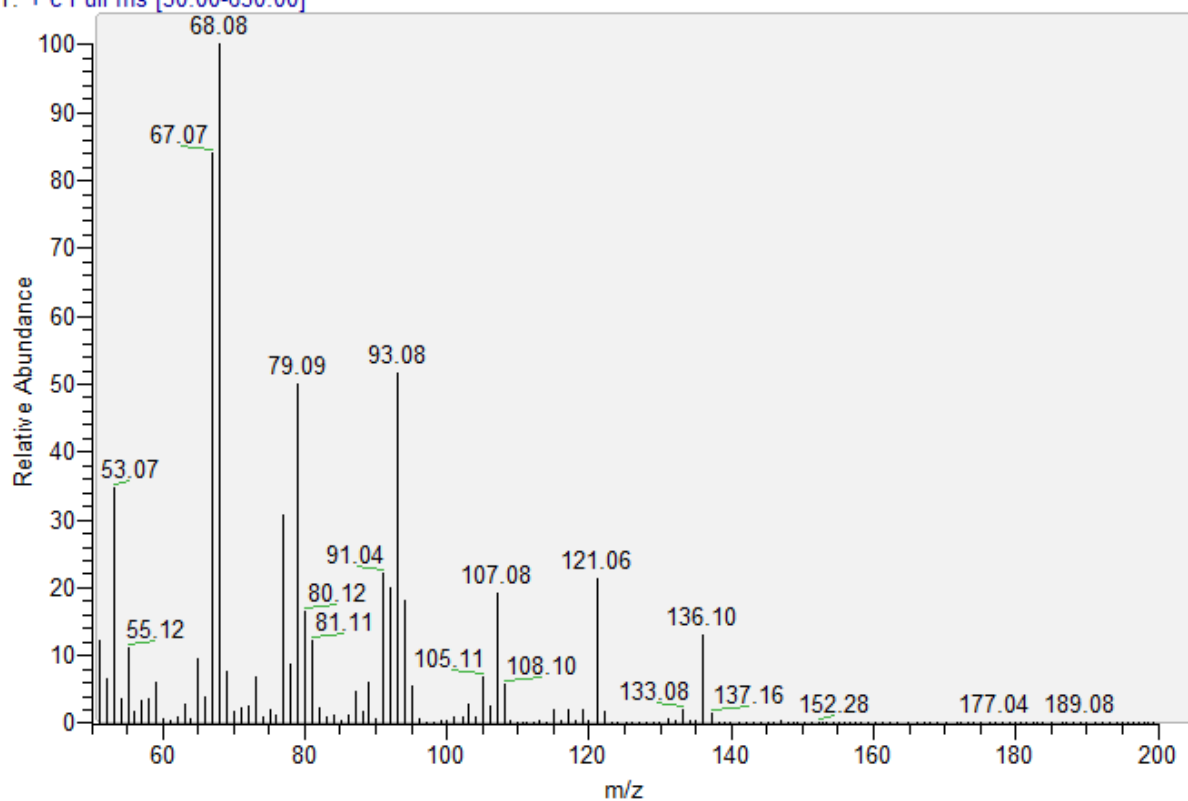

3073 #275-276 RT: 6.54-6.57 AV: 2 NL: 5.12E5  
T: + c Full ms [50.00-650.00]

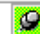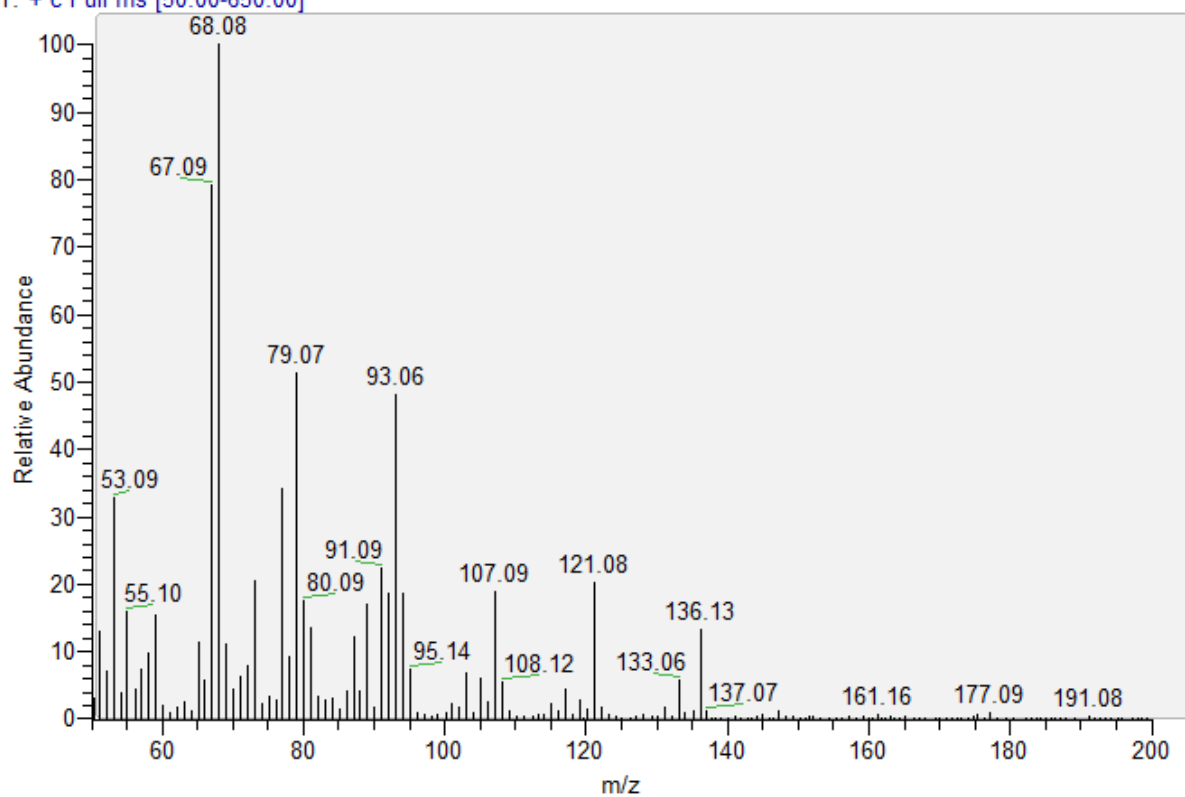

3073 #275 RT: 6.54 AV: 1 NL: 5.83E5  
T: + c Full ms [50.00-650.00]

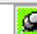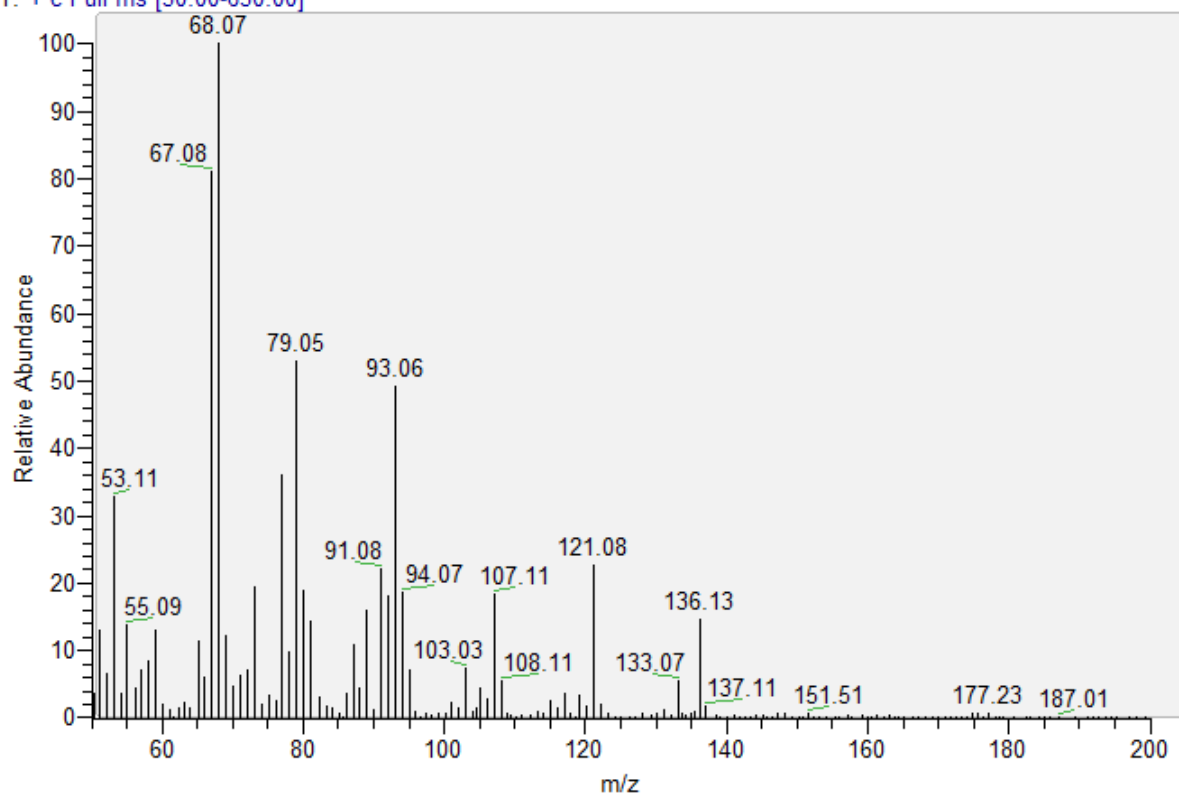

3072 #275-276 RT: 6.54-6.57 AV: 2 NL: 1.13E6  
T: + c Full ms [50.00-650.00]

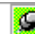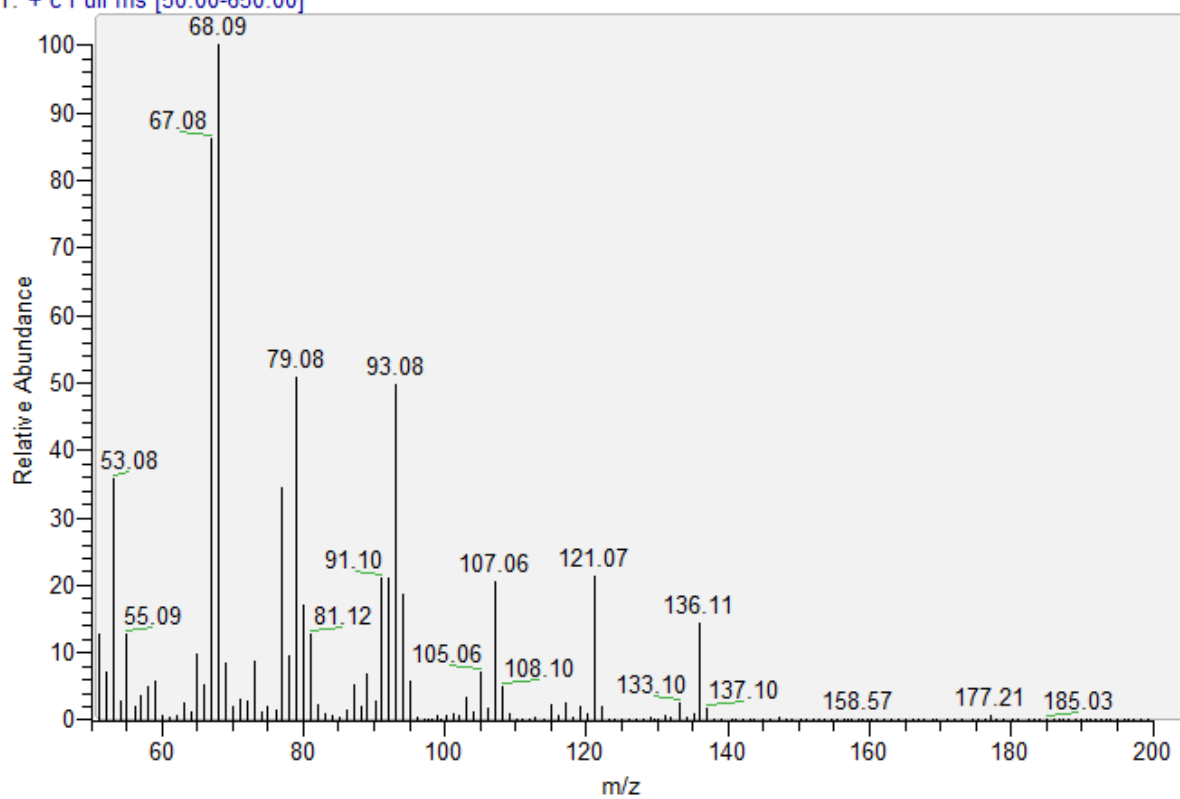

3070 #275-277 RT: 6.52-6.57 AV: 3 NL: 7.50E5  
T: + c Full ms [50.00-650.00]

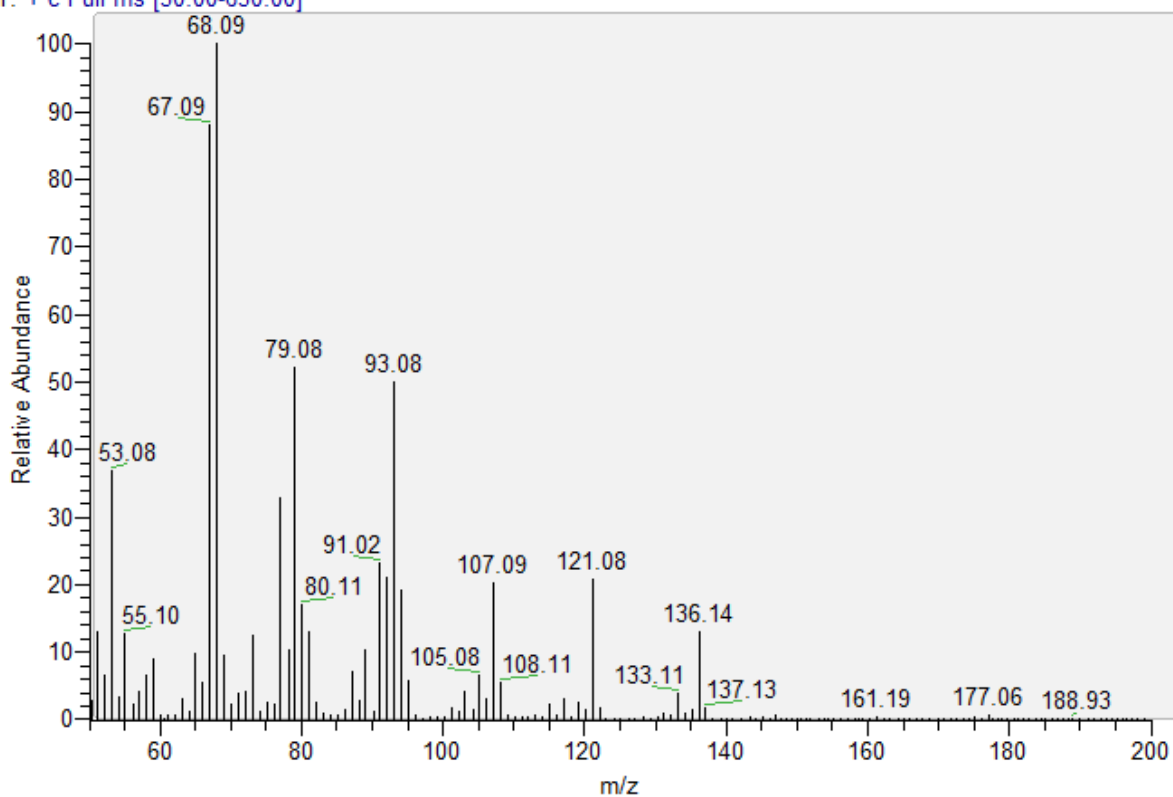

p-cymene

Reference:

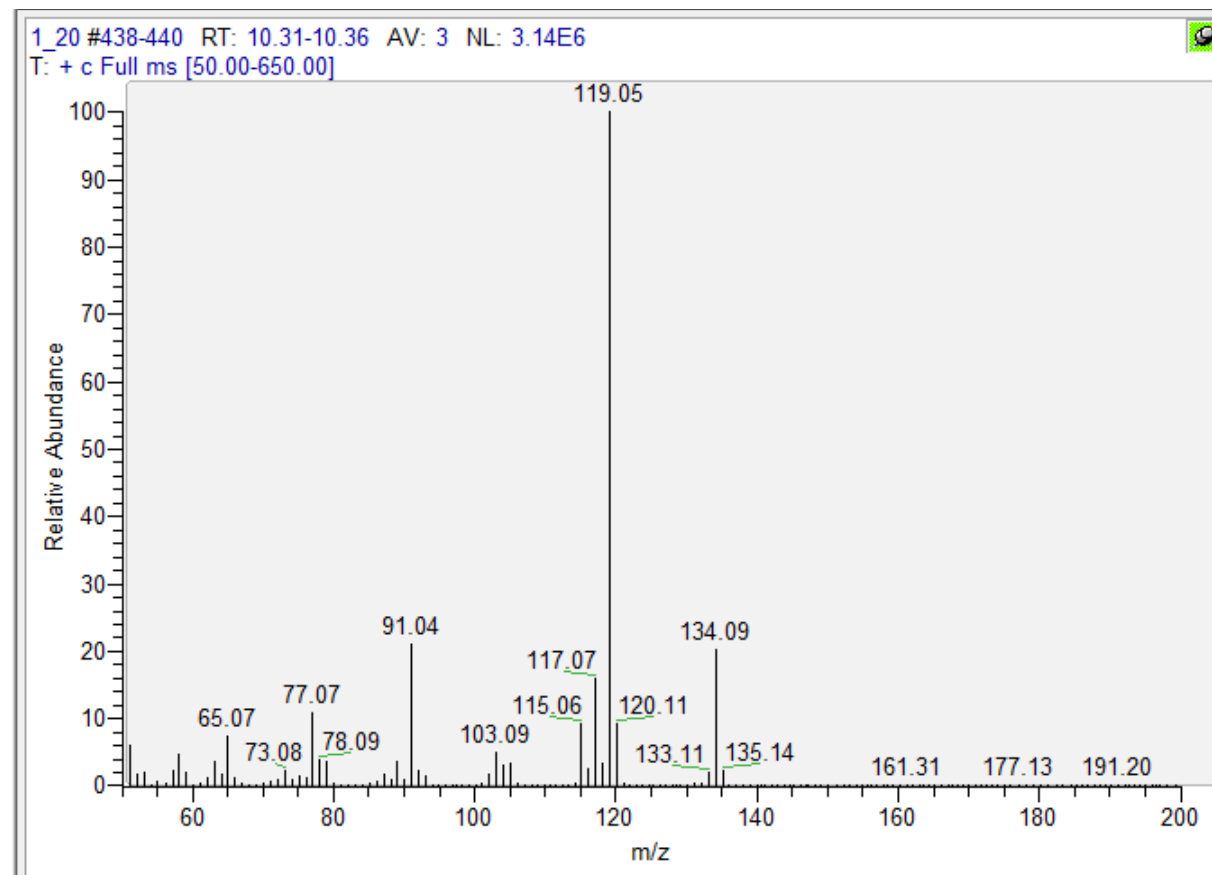

## Samples

3018 #436-437 RT: 10.32-10.35 AV: 2 NL: 1.54E6

T: + c Full ms [50.00-650.00]

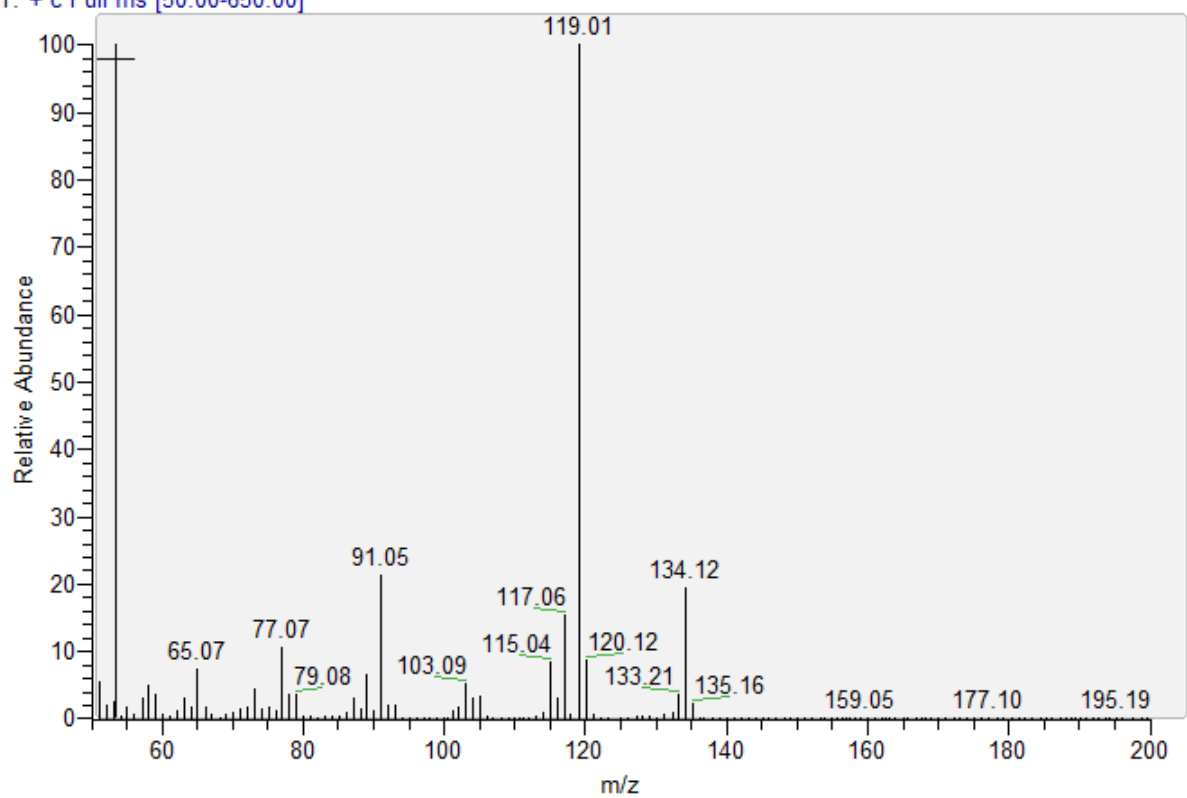

3053 #434-435 RT: 10.31-10.34 AV: 2 NL: 4.93E5  
T: + c Full ms [50.00-650.00]

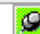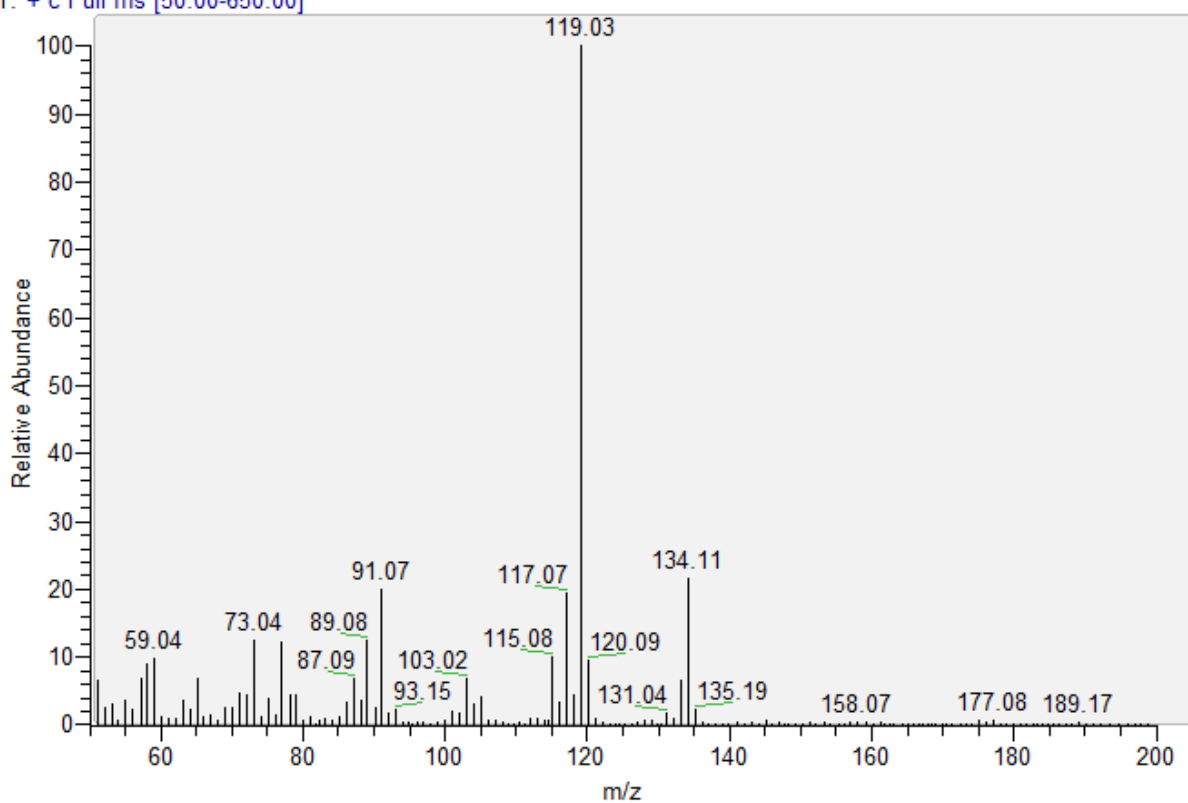



3058 #433-434 RT: 10.32-10.34 AV: 2 NL: 6.30E6  
T: + c Full ms [50.00-650.00]

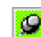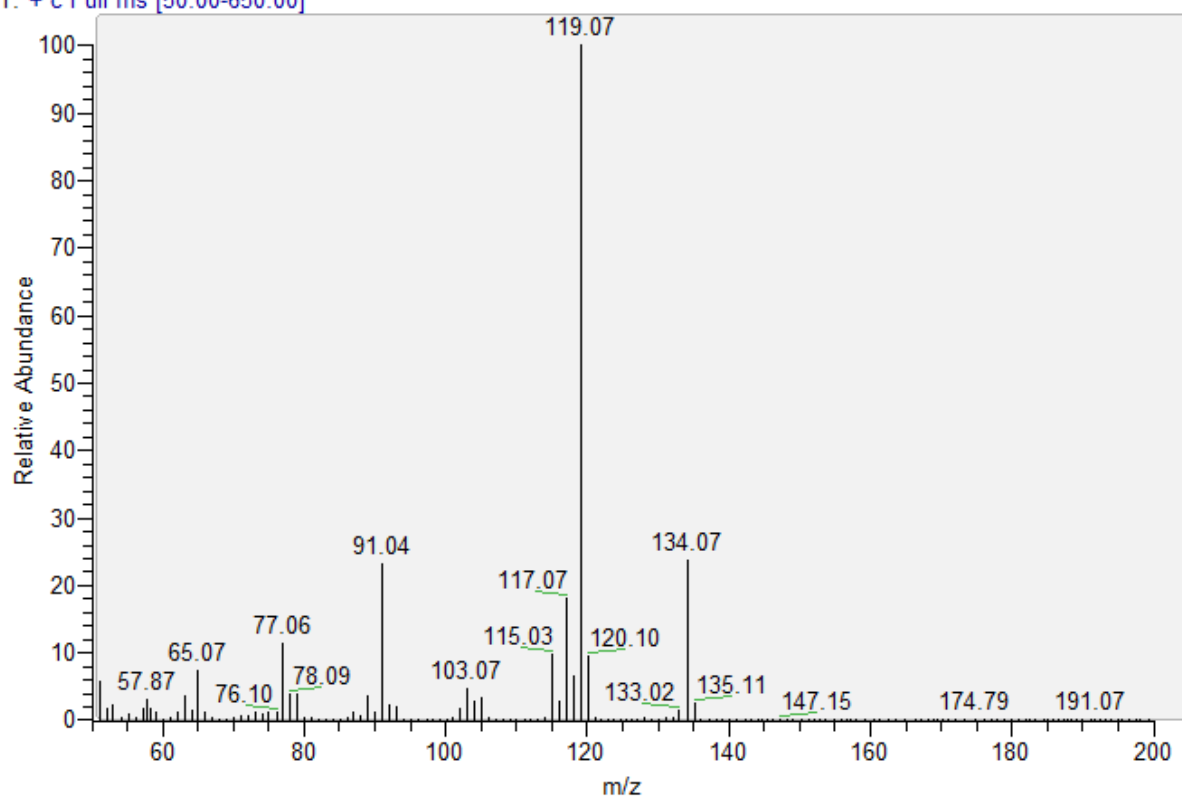

3057 #437-438 RT: 10.32-10.34 AV: 2 NL: 3.05E6  
T: + c Full ms [50.00-650.00]

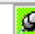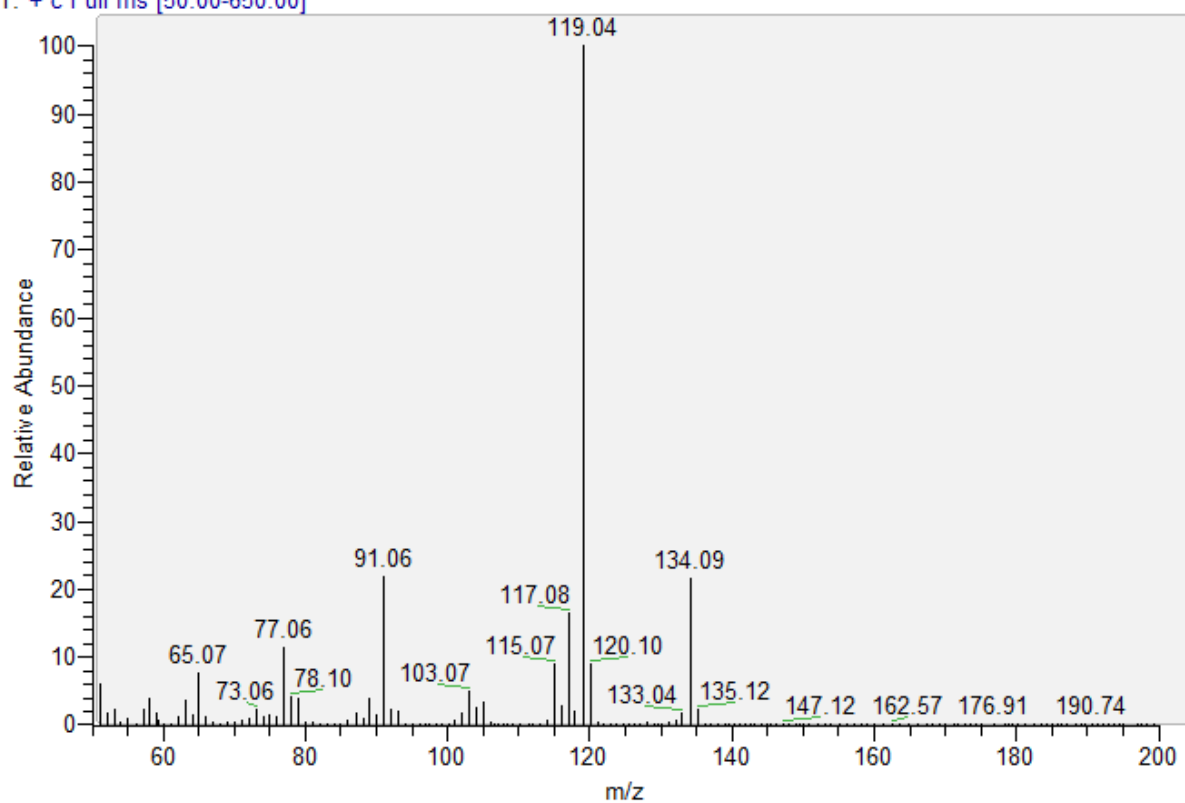

3021 #435-436 RT: 10.33-10.35 AV: 2 NL: 4.11E6  
T: + c Full ms [50.00-650.00]

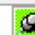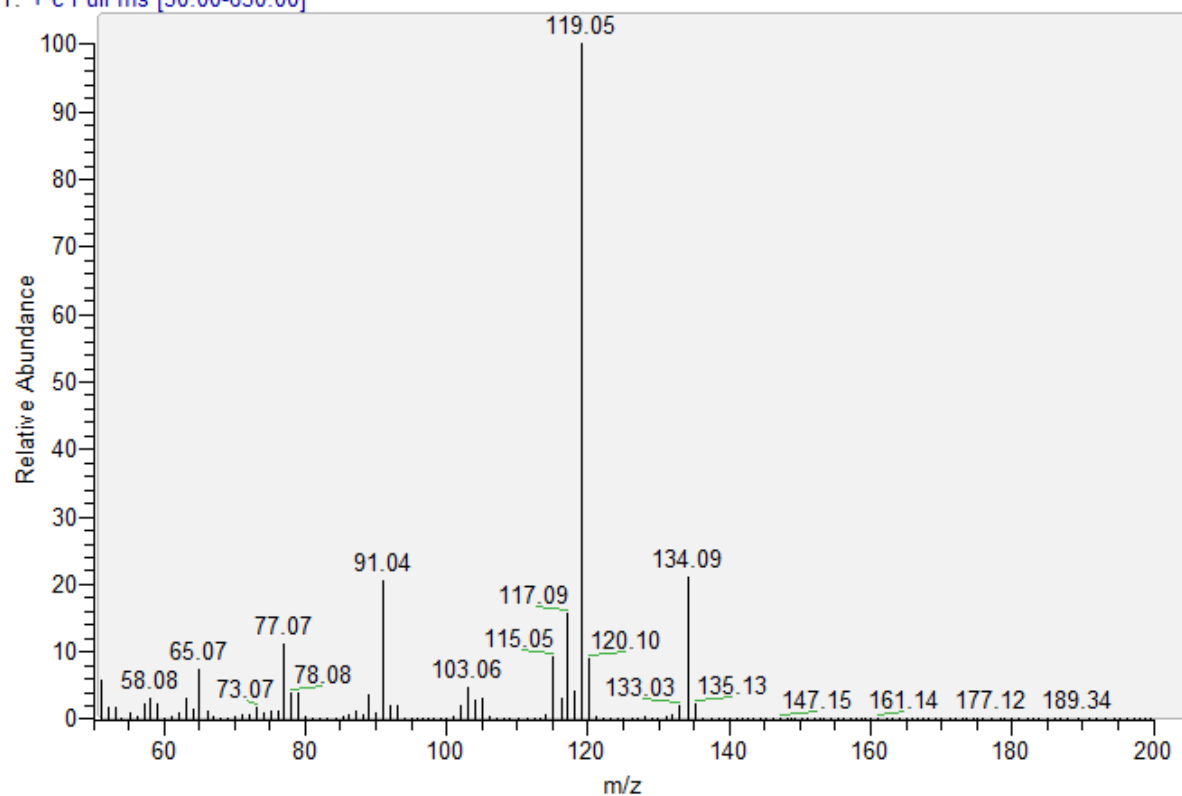

3075 #434-435 RT: 10.33-10.35 AV: 2 NL: 1.57E6  
T: + c Full ms [50.00-650.00]

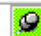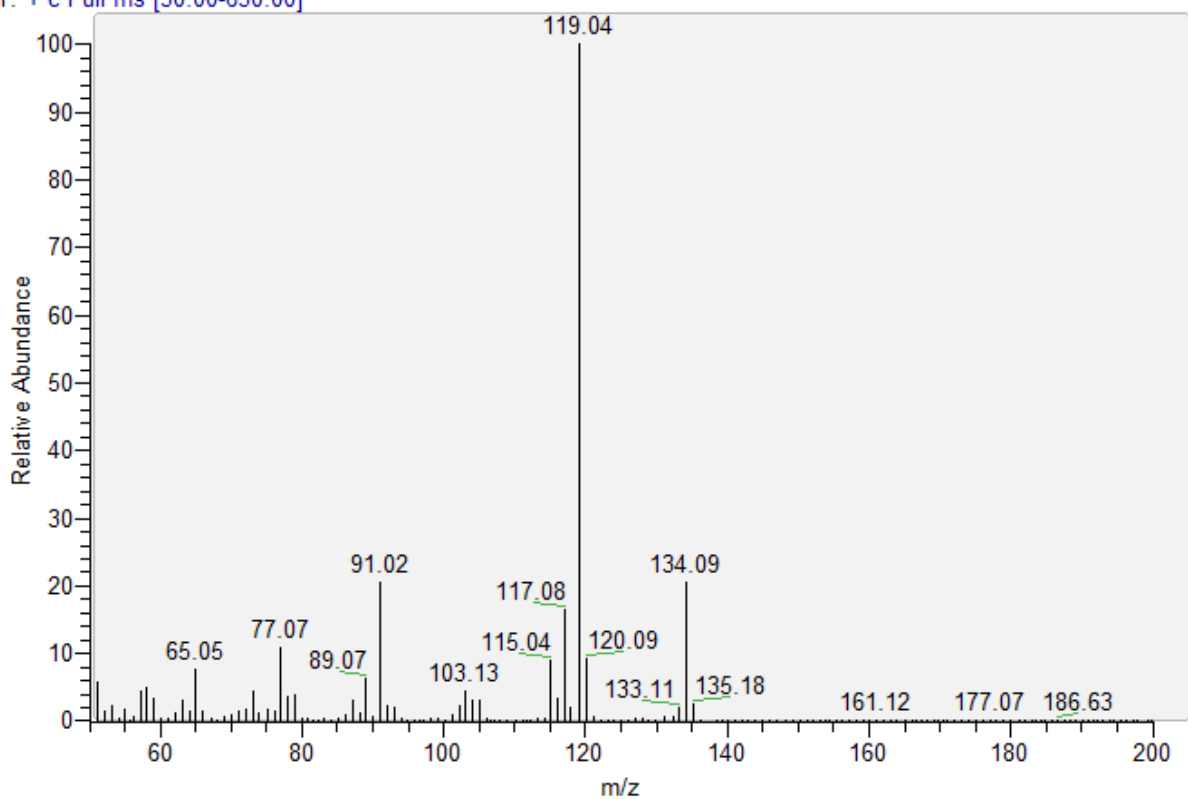

3074 #435-437 RT: 10.32-10.37 AV: 3 NL: 3.34E6

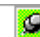

T: + c Full ms [50.00-650.00]

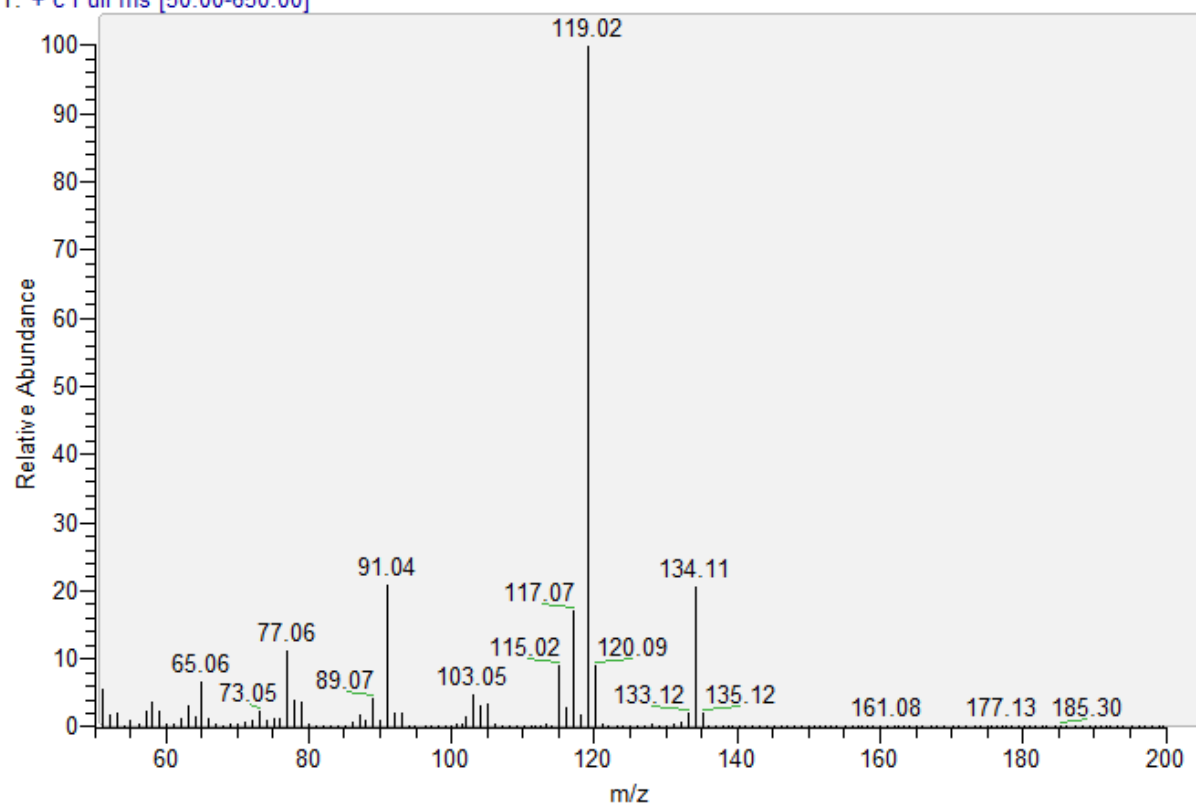

3073 #433-434 RT: 10.31-10.33 AV: 2 NL: 1.09E6  
T: + c Full ms [50.00-650.00]

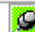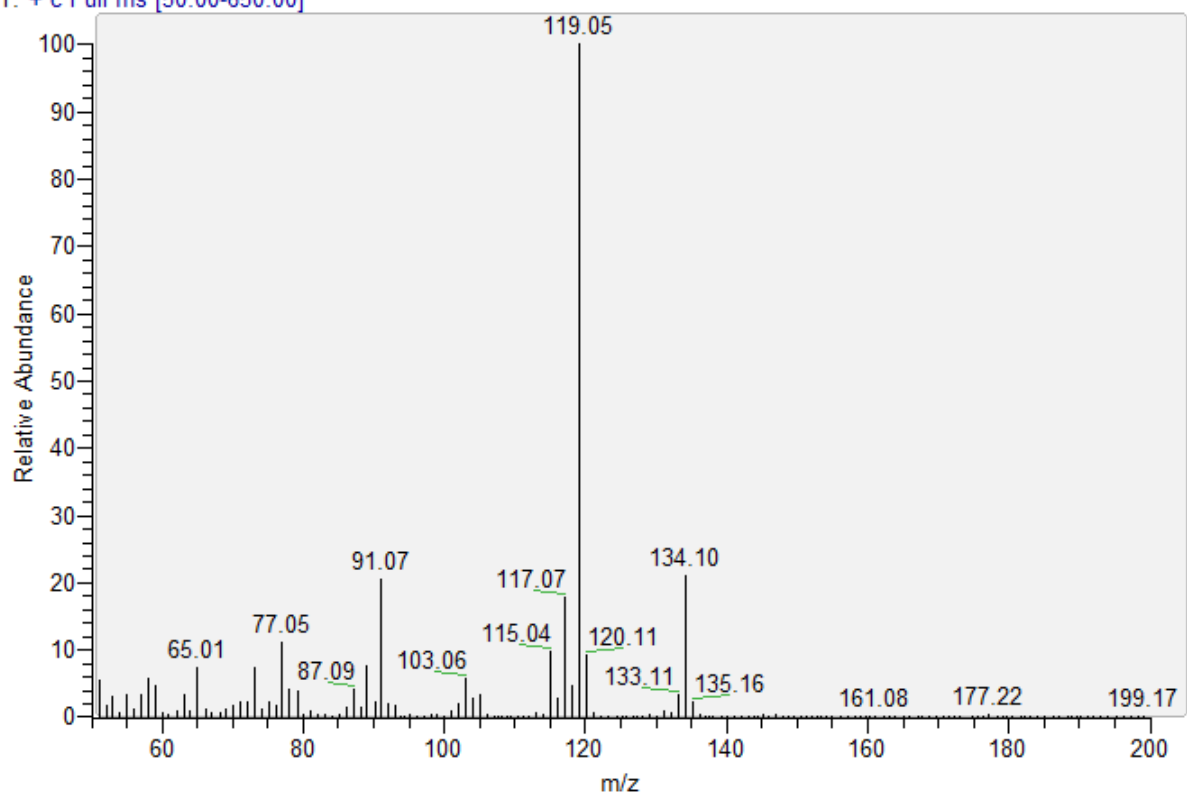

3073 #433-434 RT: 10.31-10.33 AV: 2 NL: 1.09E6  
T: + c Full ms [50.00-650.00]

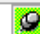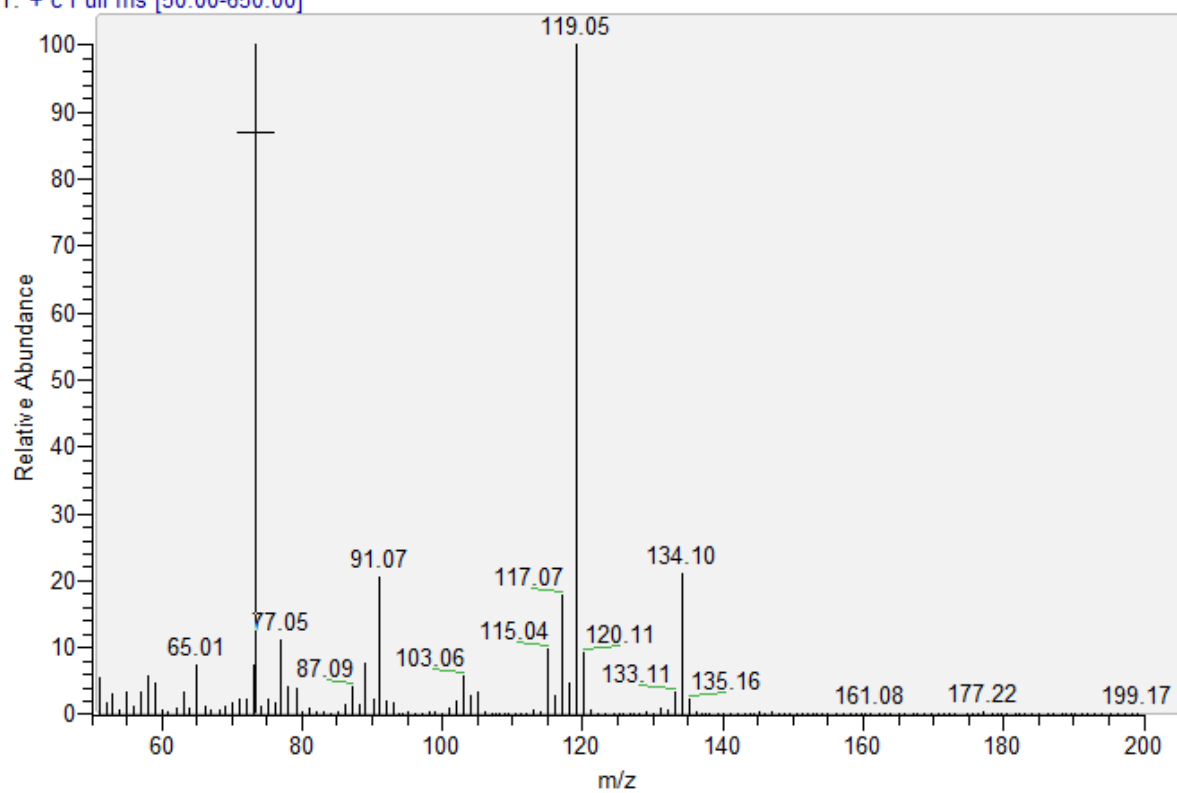

3072 #434-435 RT: 10.33-10.35 AV: 2 NL: 1.26E6

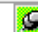

T: + c Full ms [50.00-650.00]

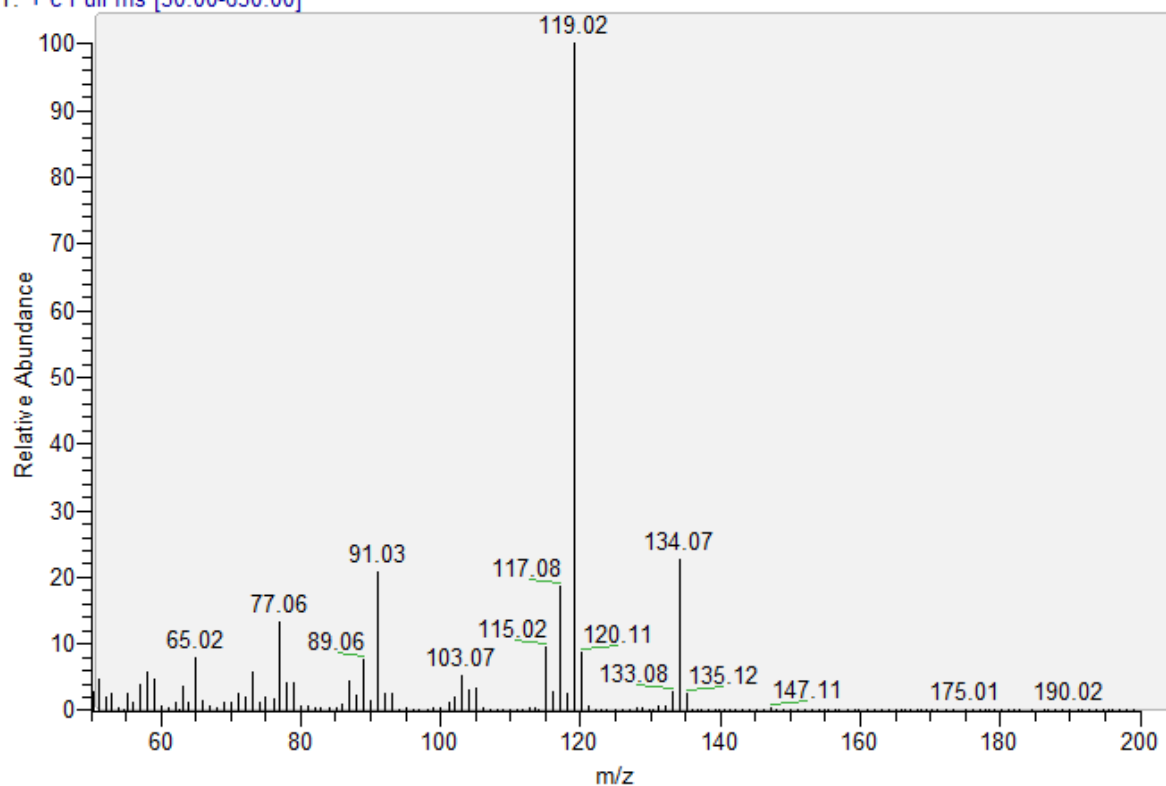



3070 #436-437 RT: 10.33-10.35 AV: 2 NL: 1.75E5

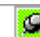

T: + c Full ms [50.00-650.00]

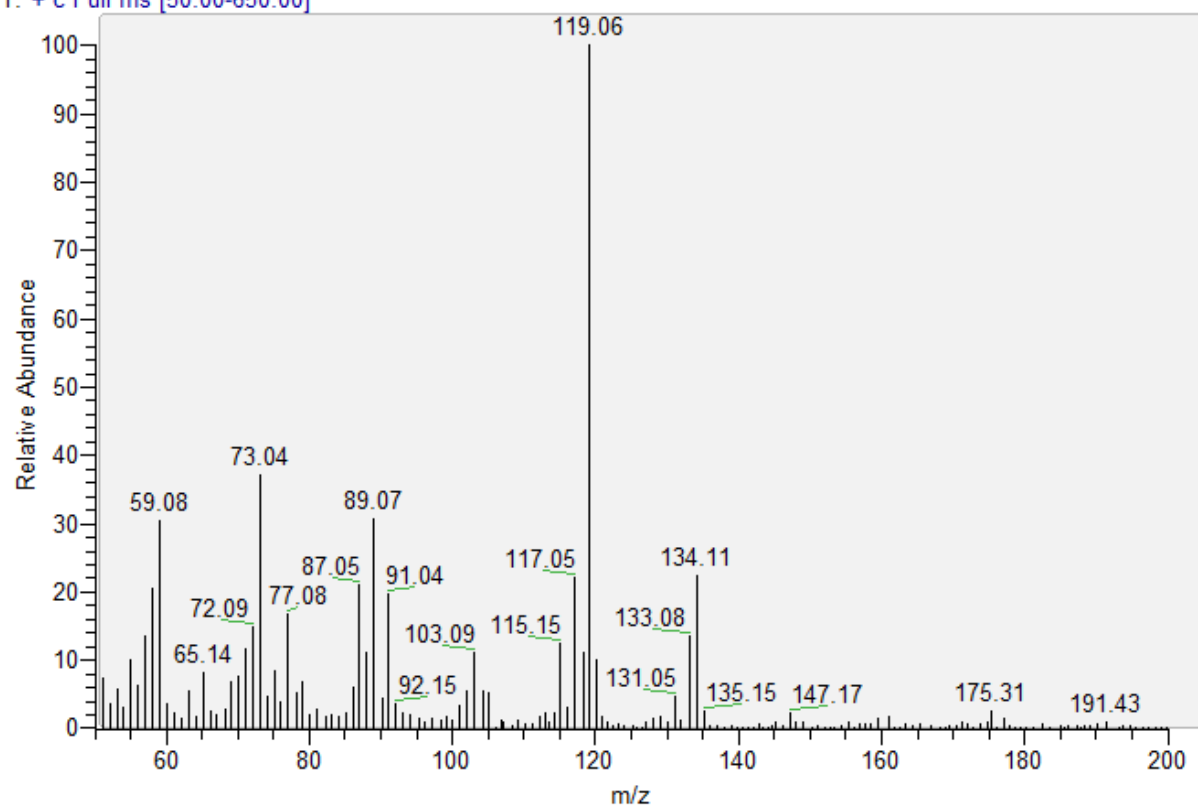

Rose oxide

Reference:

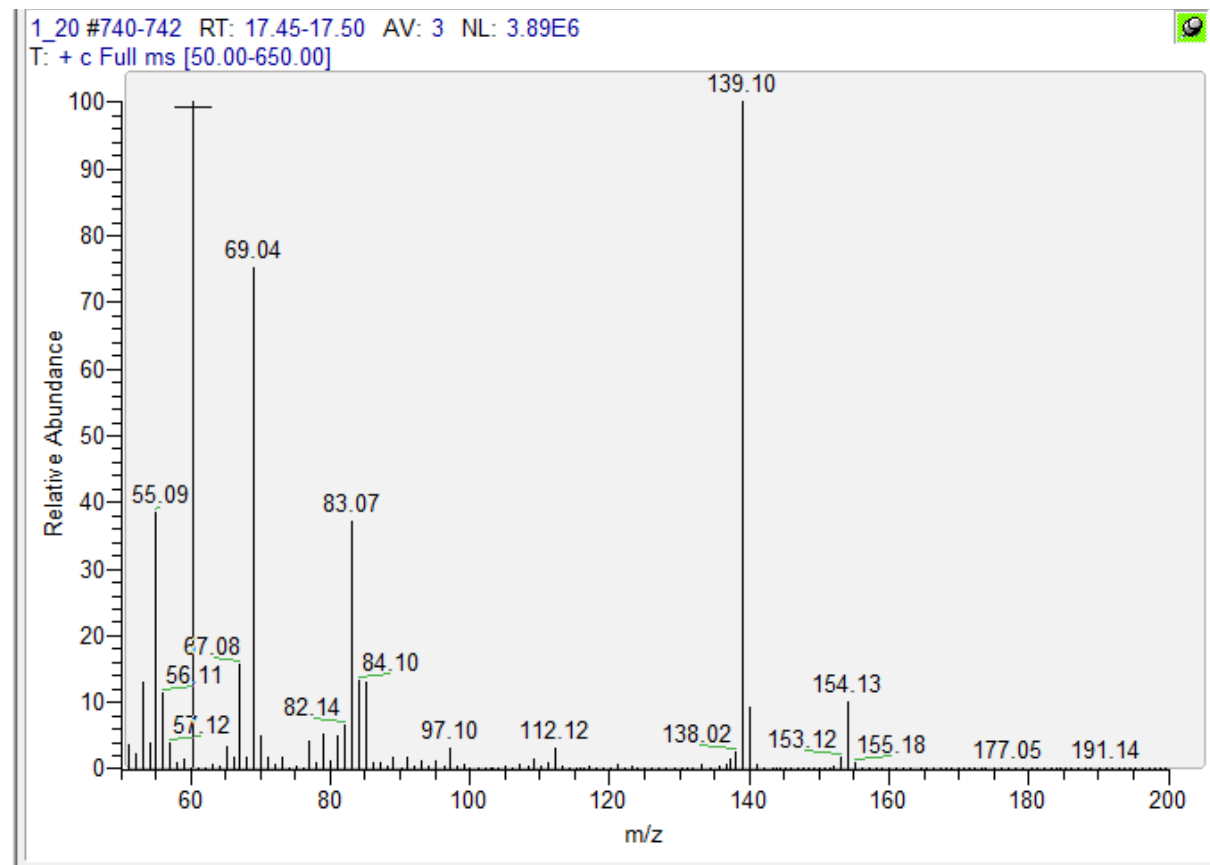

Samples:

3021 #737-738 RT: 17.49-17.52 AV: 2 NL: 1.13E7

T: + c Full ms [50.00-650.00]

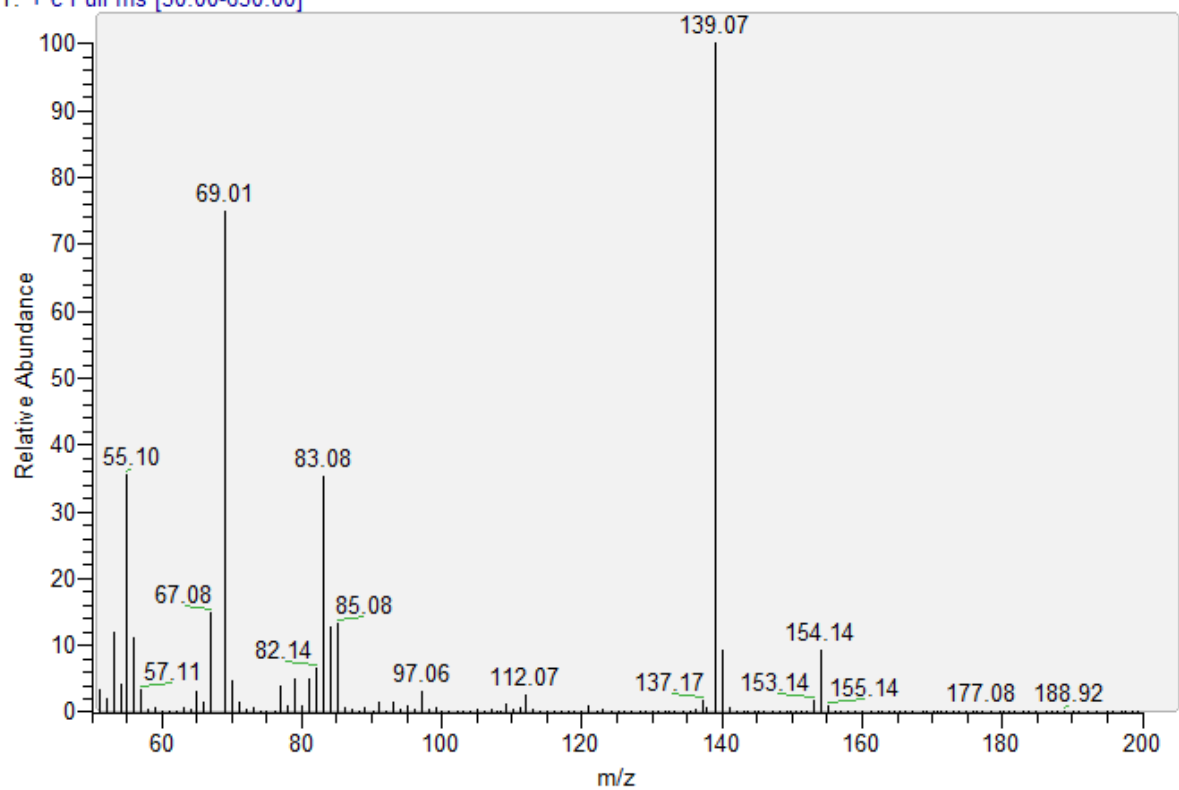

3057 #740-742 RT: 17.50-17.54 AV: 3 NL: 2.69E7  
T: + c Full ms [50.00-650.00]

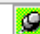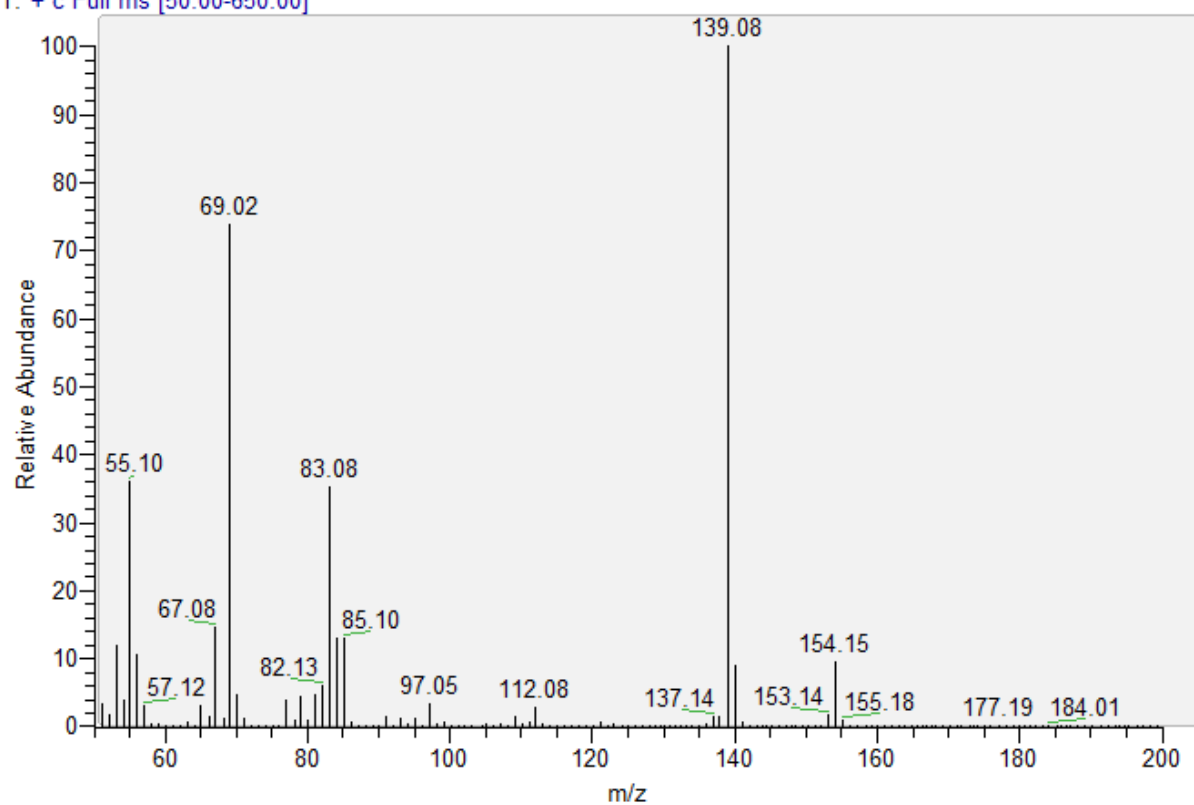

3058 #735-737 RT: 17.52-17.57 AV: 3 NL: 5.30E7

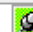

T: + c Full ms [50.00-650.00]

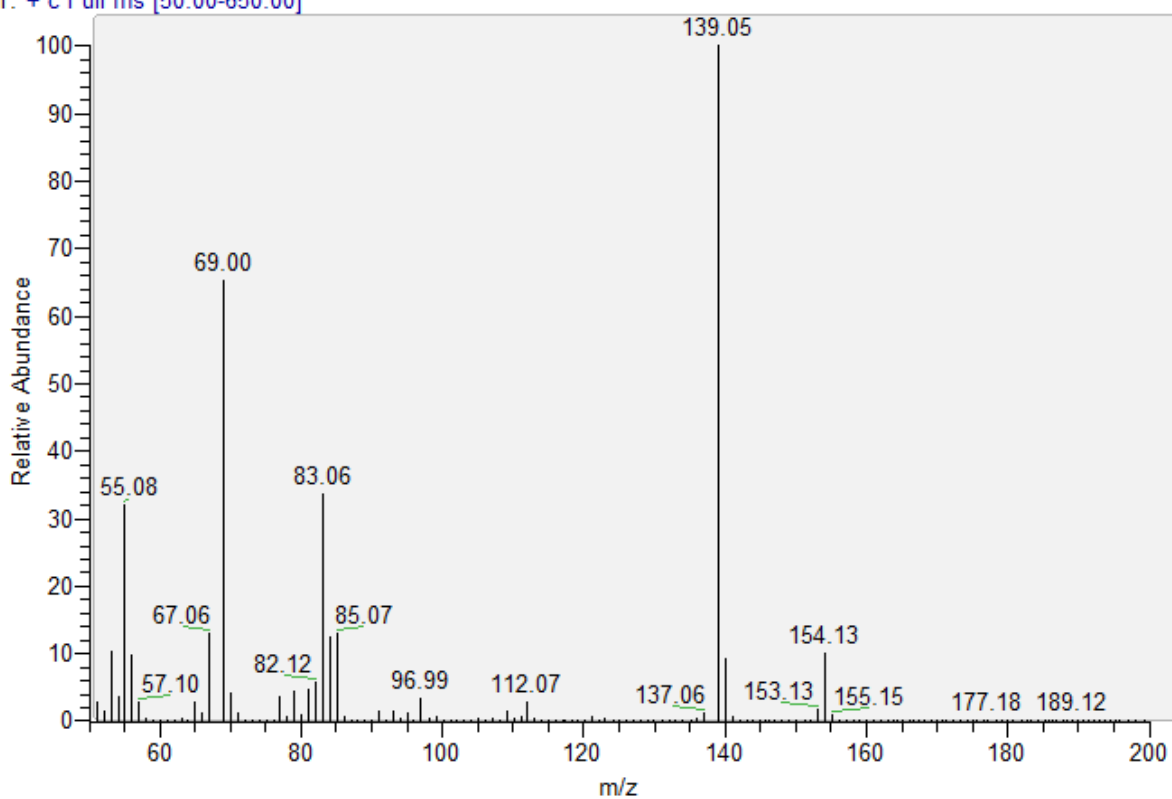

3053 #734-736 RT: 17.45-17.50 AV: 3 NL: 6.05E5  
T: + c Full ms [50.00-650.00]

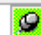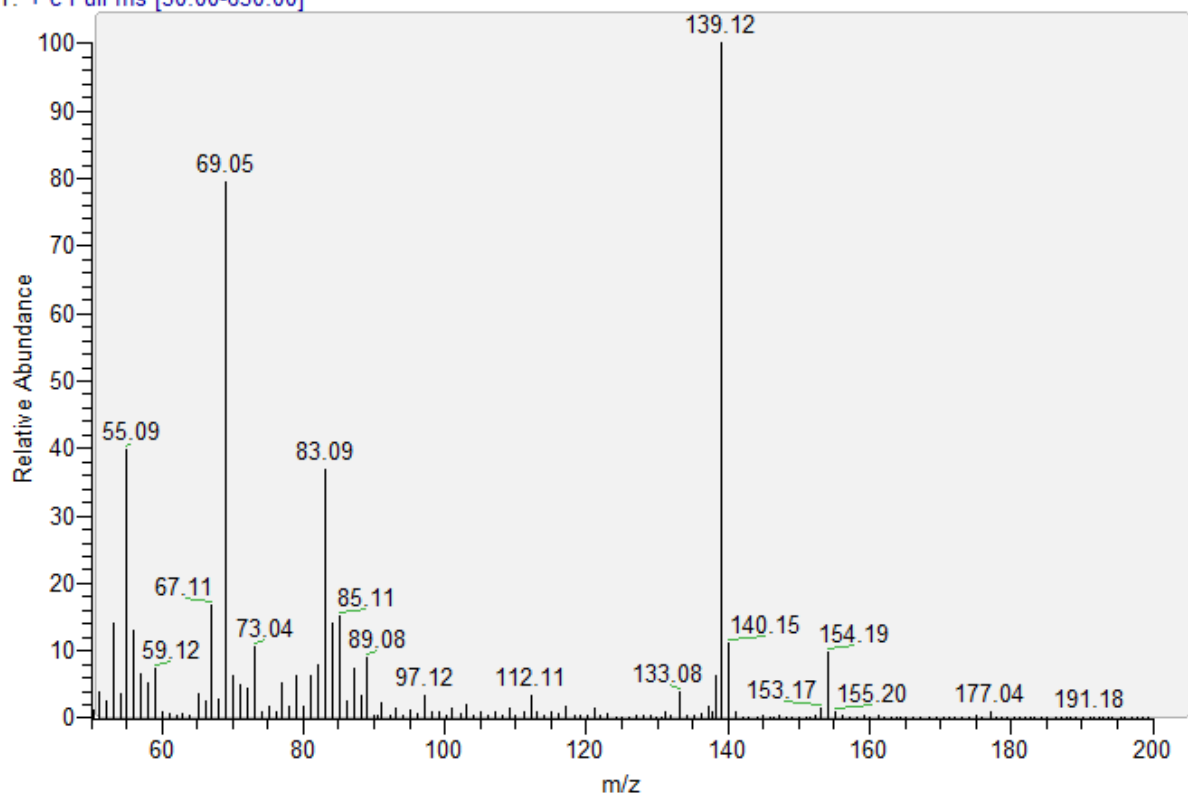

3018 #739-740 RT: 17.48-17.50 AV: 2 NL: 7.86E6  
T: + c Full ms [50.00-650.00]

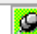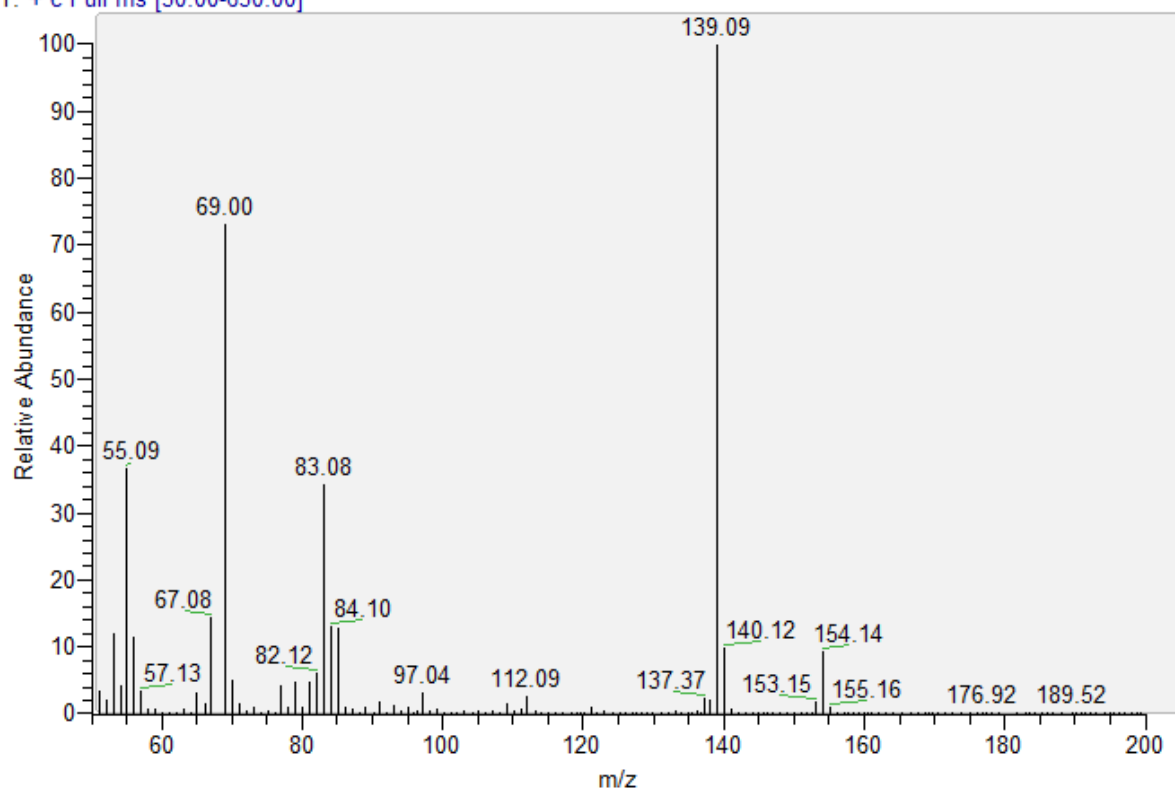

3075 #735-736 RT: 17.49-17.52 AV: 2 NL: 6.79E6  
T: + c Full ms [50.00-650.00]

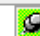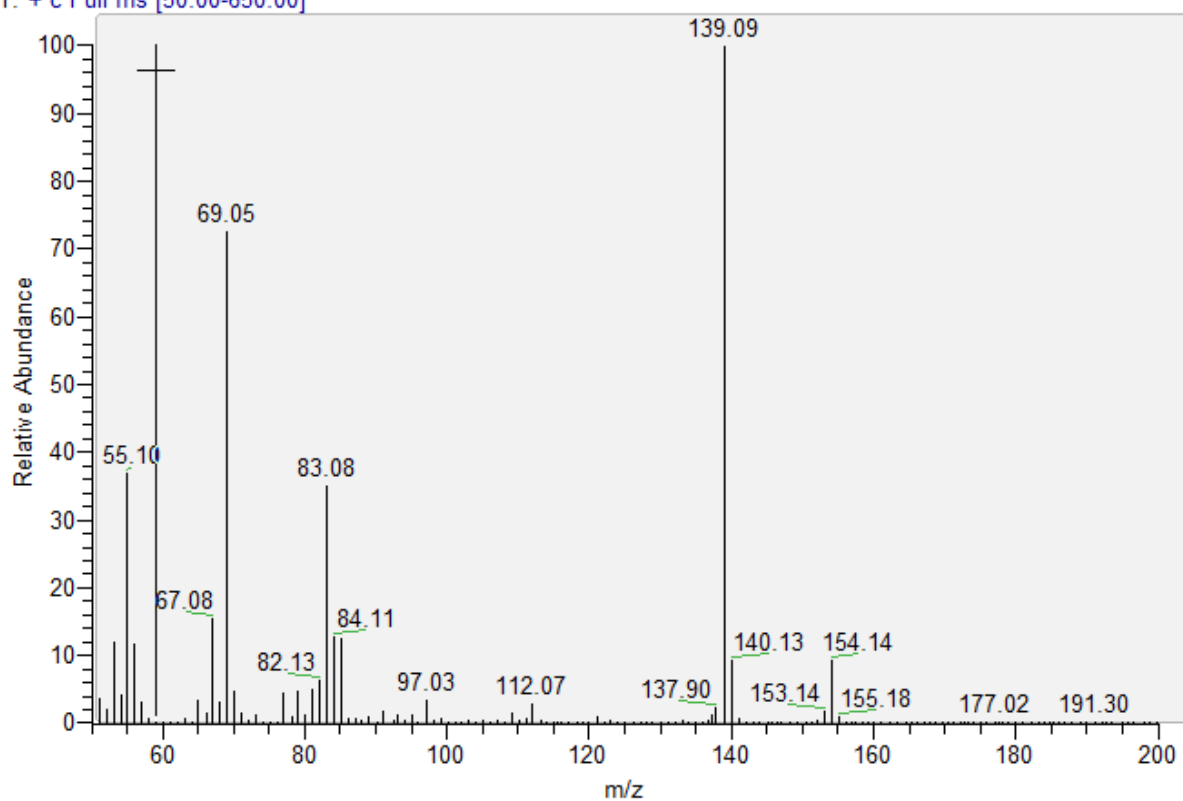



3074 #737-738 RT: 17.48-17.51 AV: 2 NL: 6.74E6  
T: + c Full ms [50.00-650.00]

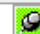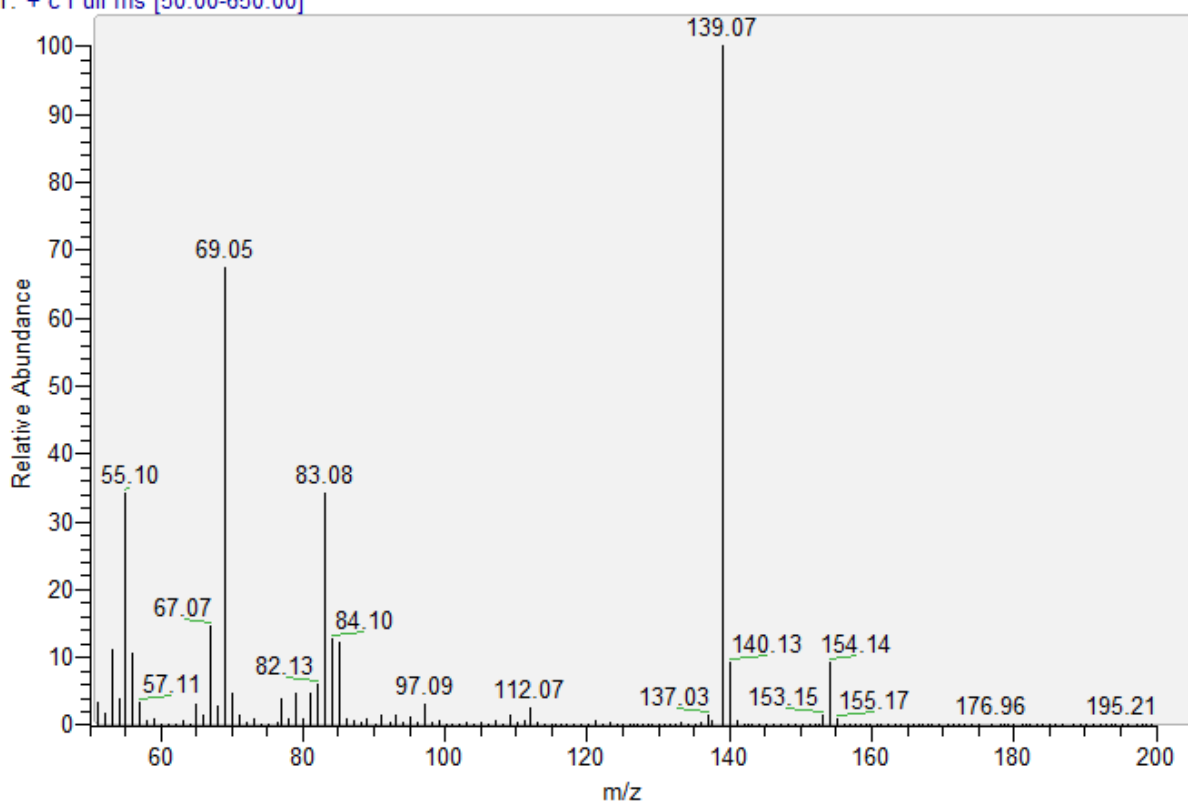

3073 #733-734 RT: 17.46-17.48 AV: 2 NL: 5.85E6  
T: + c Full ms [50.00-650.00]

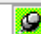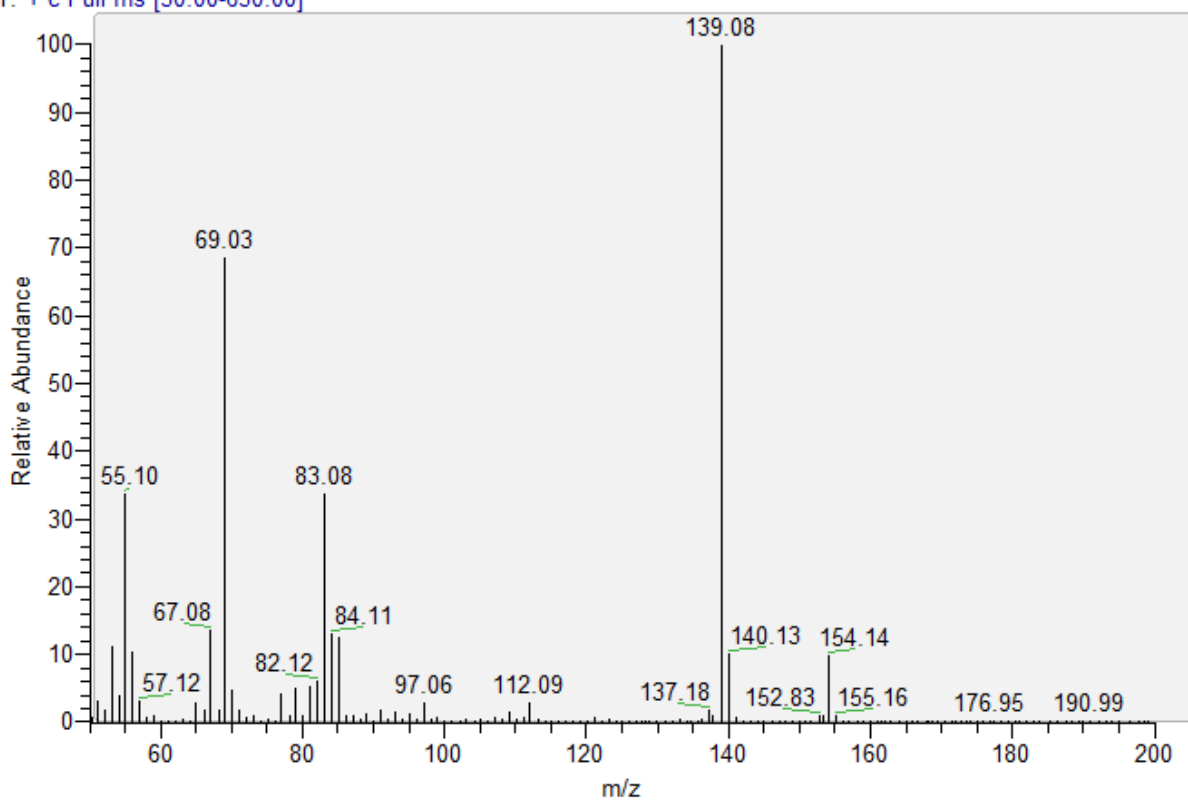

3073 #733-734 RT: 17.46-17.48 AV: 2 NL: 5.85E6  
T: + c Full ms [50.00-650.00]

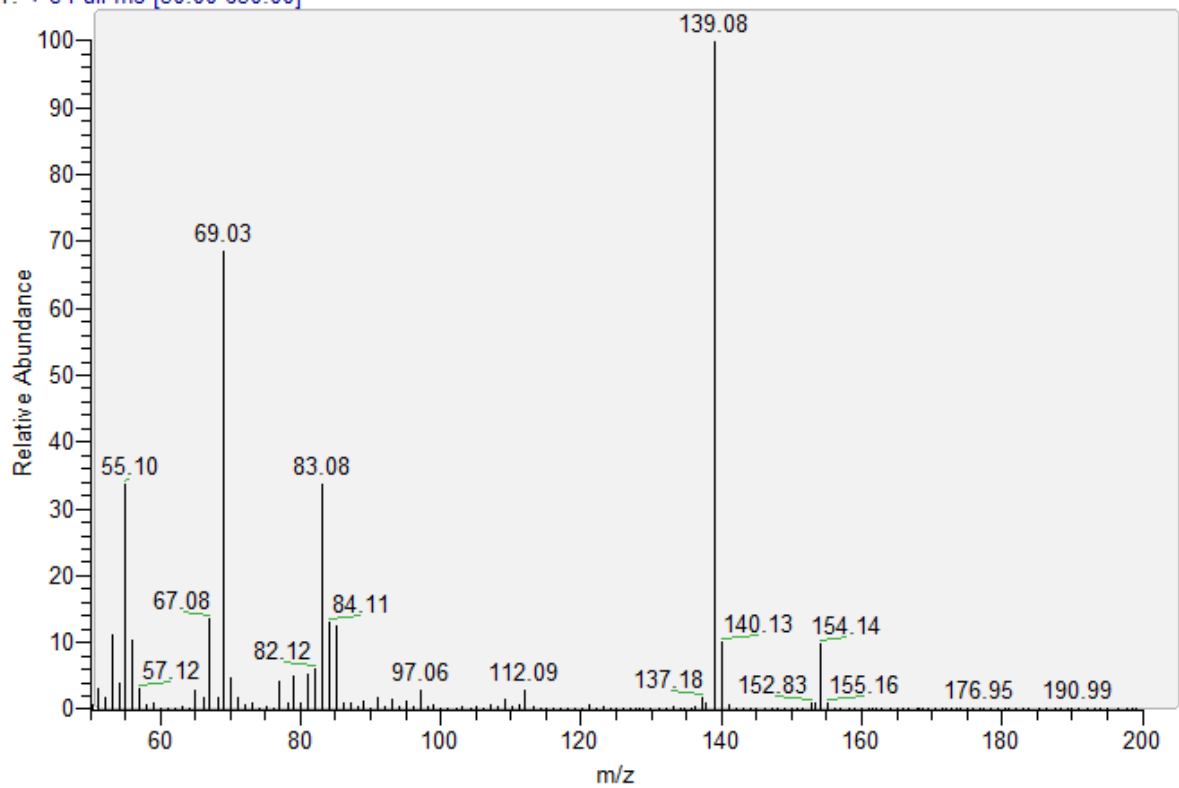

3072 #734-735 RT: 17.47-17.49 AV: 2 NL: 6.09E6  
T: + c Full ms [50.00-650.00]

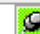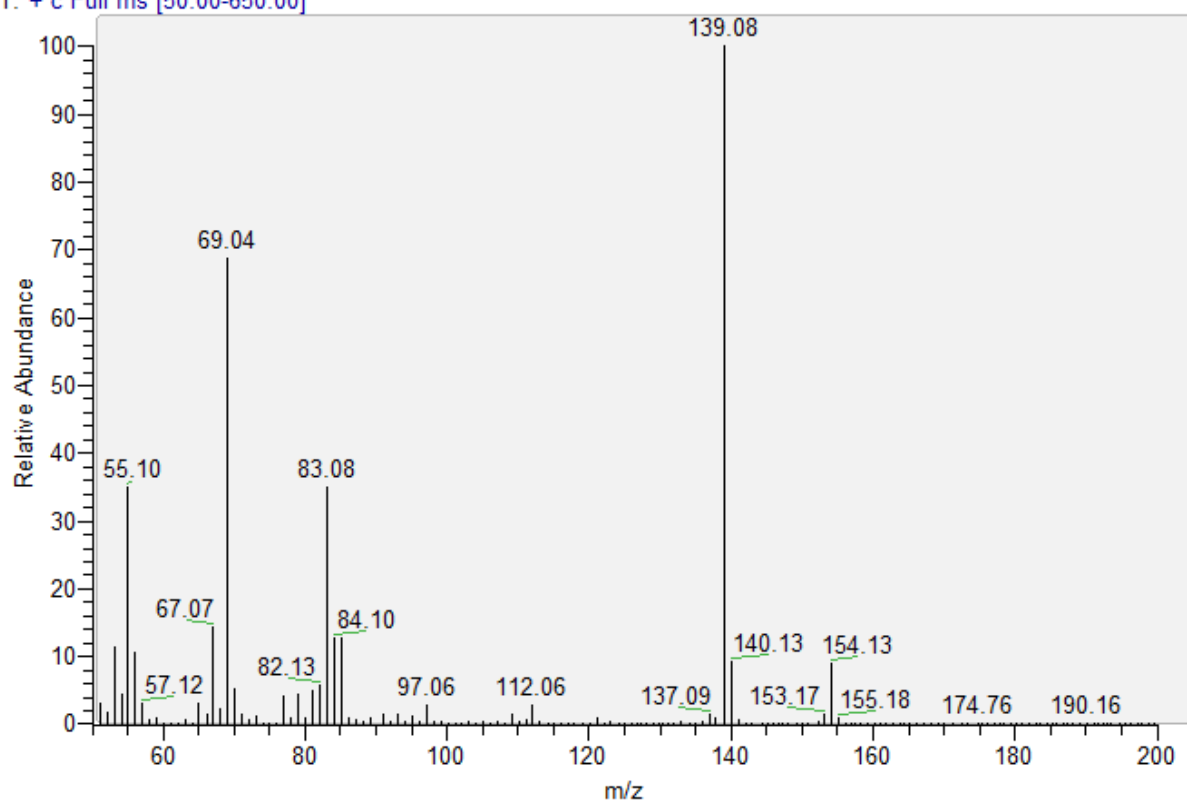

3070 #736-737 RT: 17.46-17.49 AV: 2 NL: 4.87E5  
T: + c Full ms [50.00-650.00]

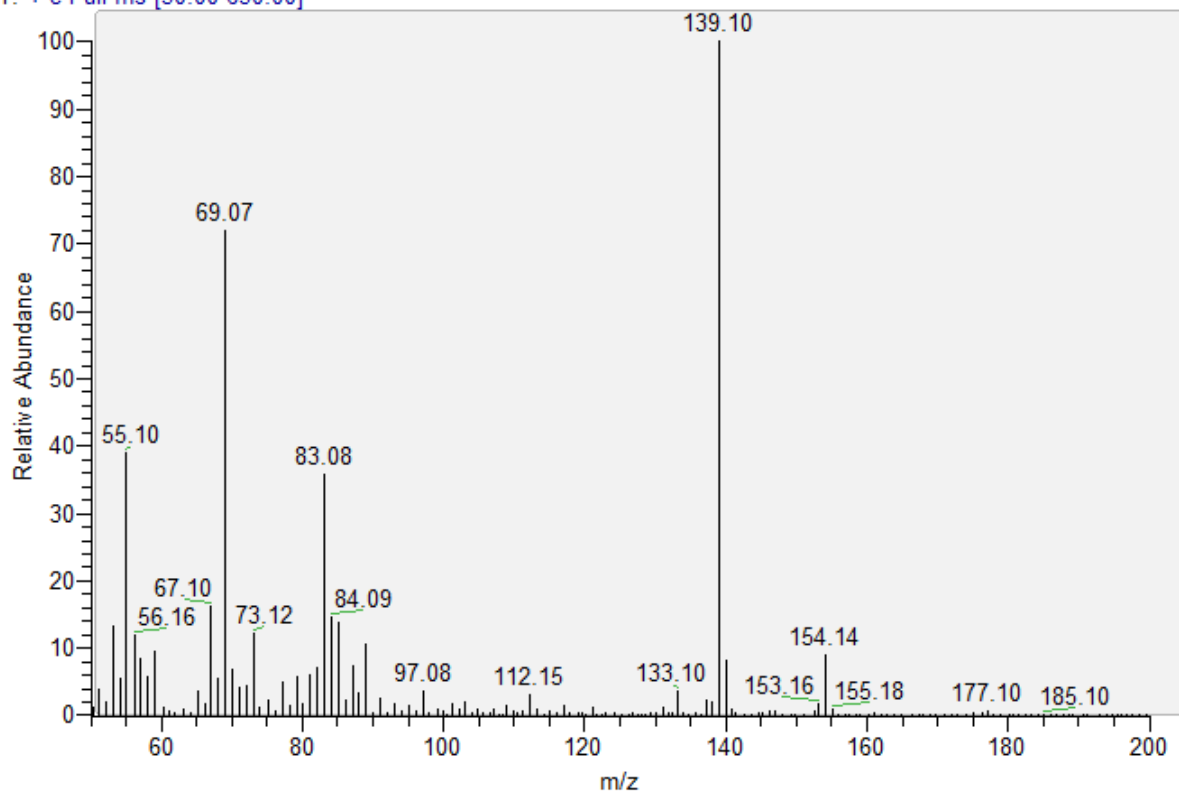

Linalool

Reference

1\_20 #1099-1100 RT: 25.99-26.02 AV: 2 NL: 4.54E6  
T: + c Full ms [50.00-650.00]

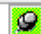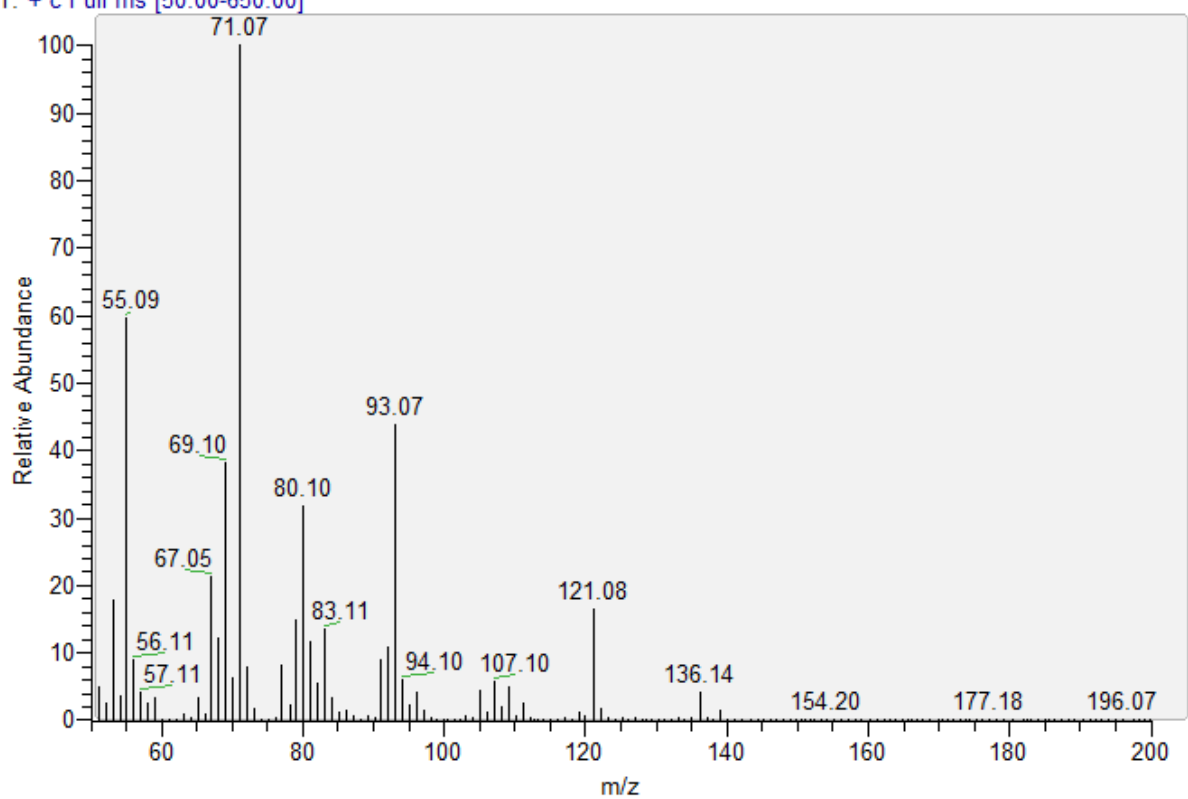

Samples:

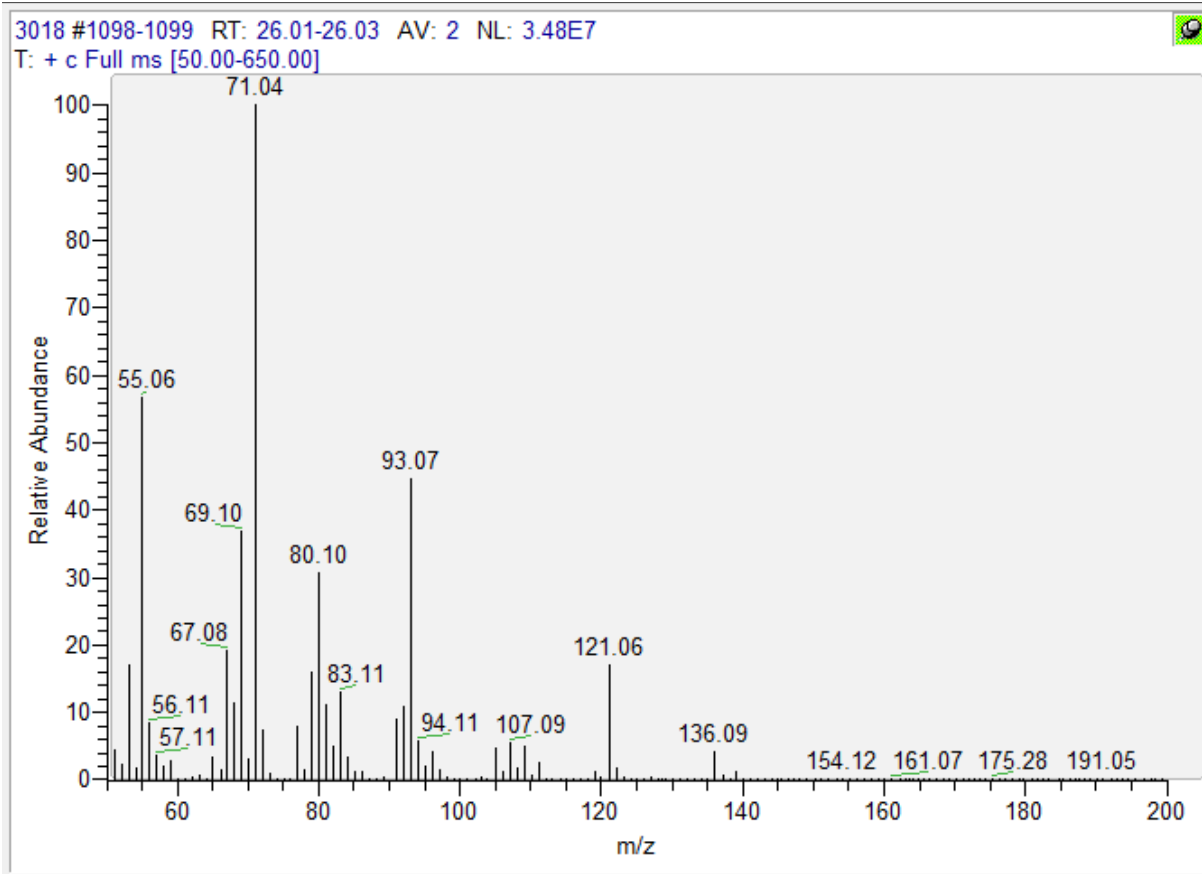

3053 #1093-1094 RT: 25.99-26.01 AV: 2 NL: 7.62E6  
T: + c Full ms [50.00-650.00]

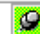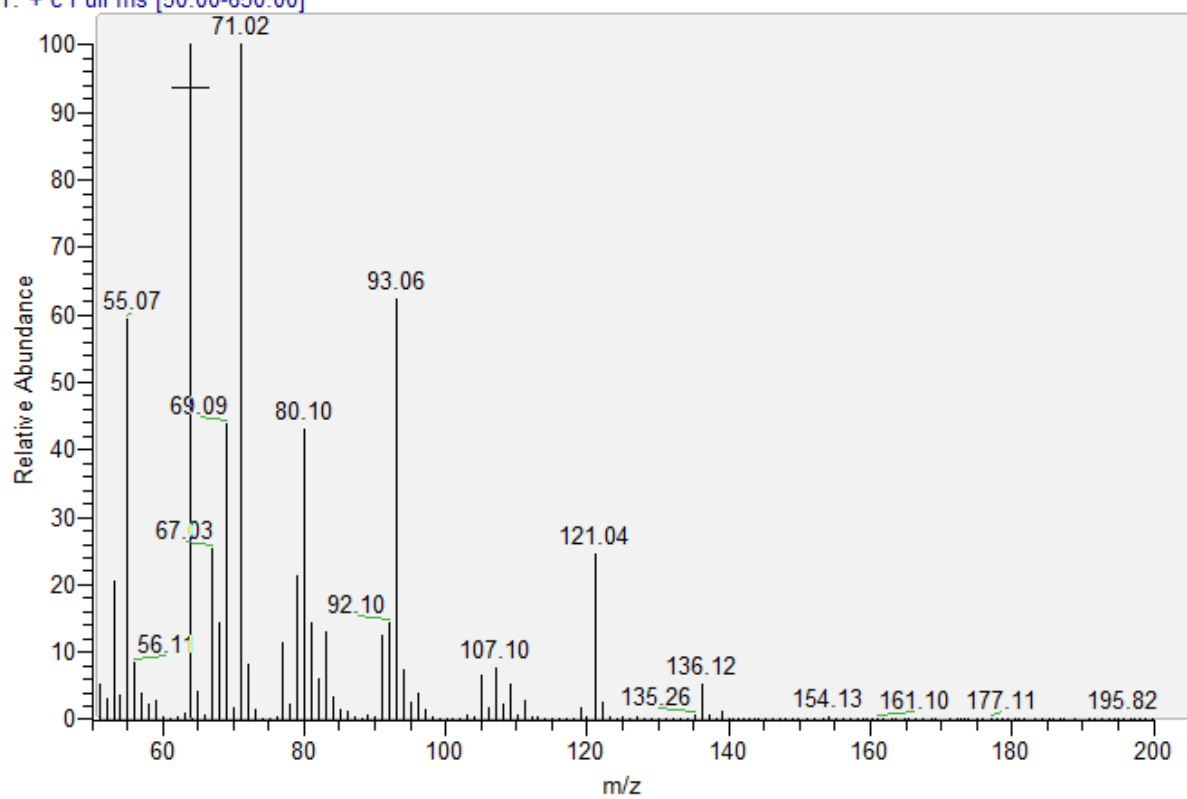



3058 #1094-1096 RT: 26.08-26.13 AV: 3 NL: 2.10E8  
T: + c Full ms [50.00-650.00]

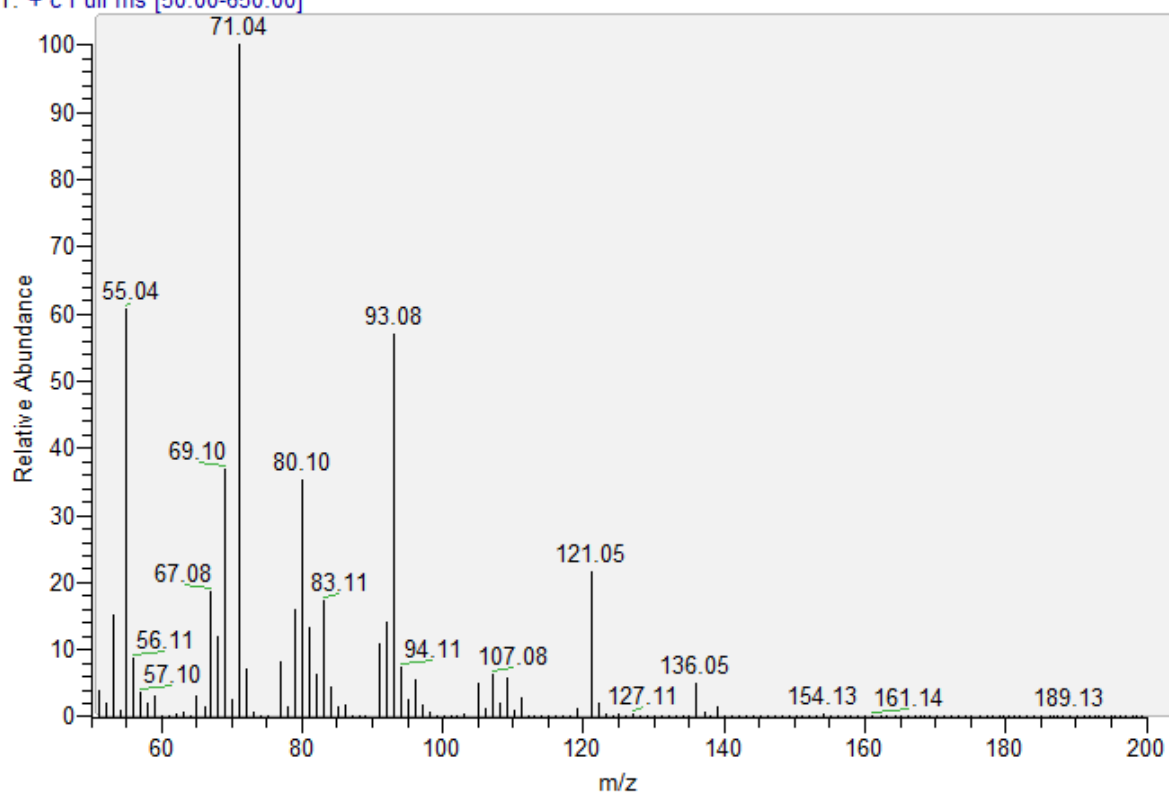

3057 #1099-1101 RT: 26.03-26.07 AV: 3 NL: 1.41E8  
T: + c Full ms [50.00-650.00]

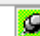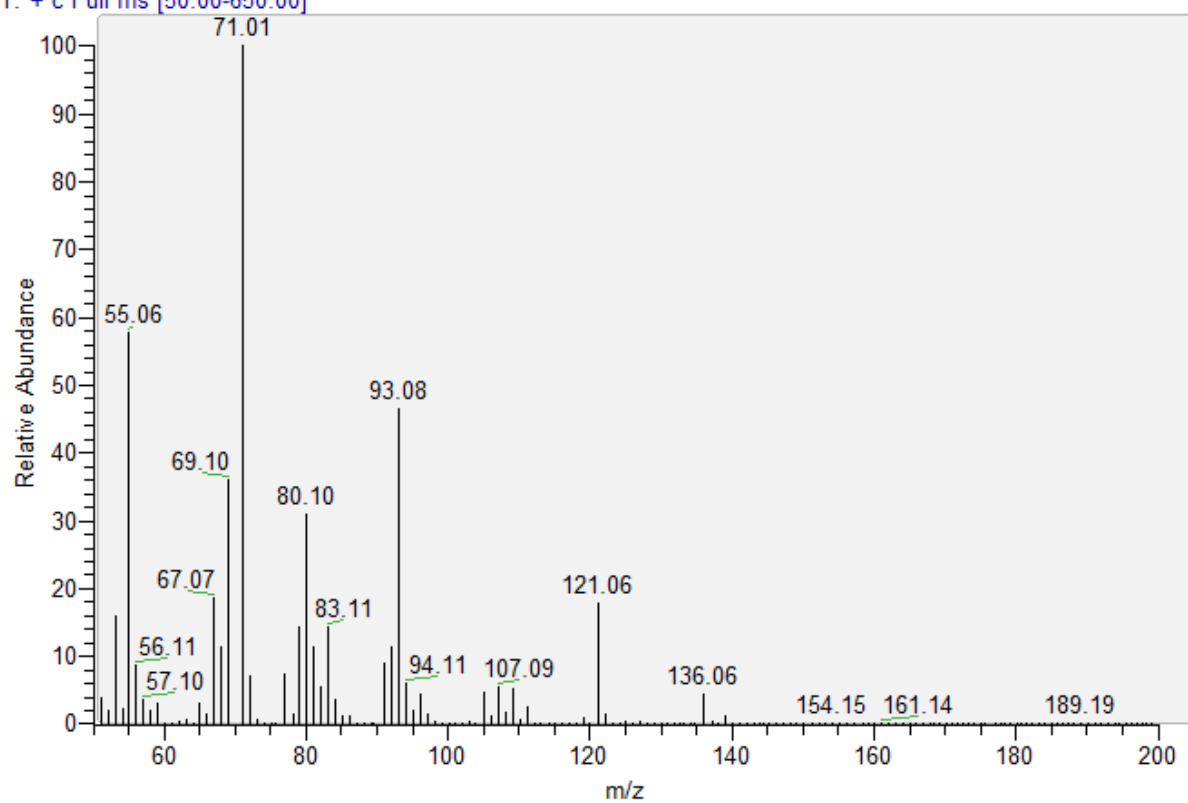

3021 #1094-1095 RT: 26.00-26.03 AV: 2 NL: 3.55E7

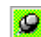

T: + c Full ms [50.00-650.00]

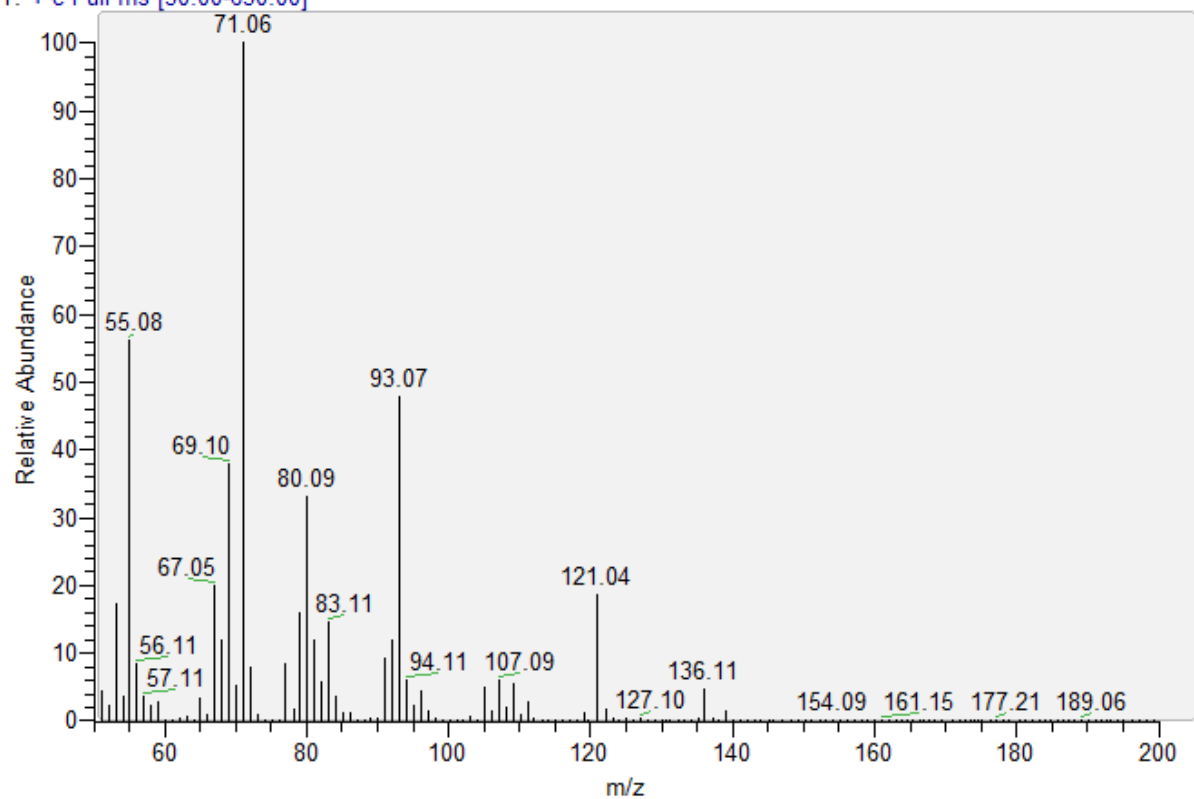

3075 #1093-1094 RT: 26.01-26.04 AV: 2 NL: 1.67E7  
T: + c Full ms [50.00-650.00]

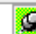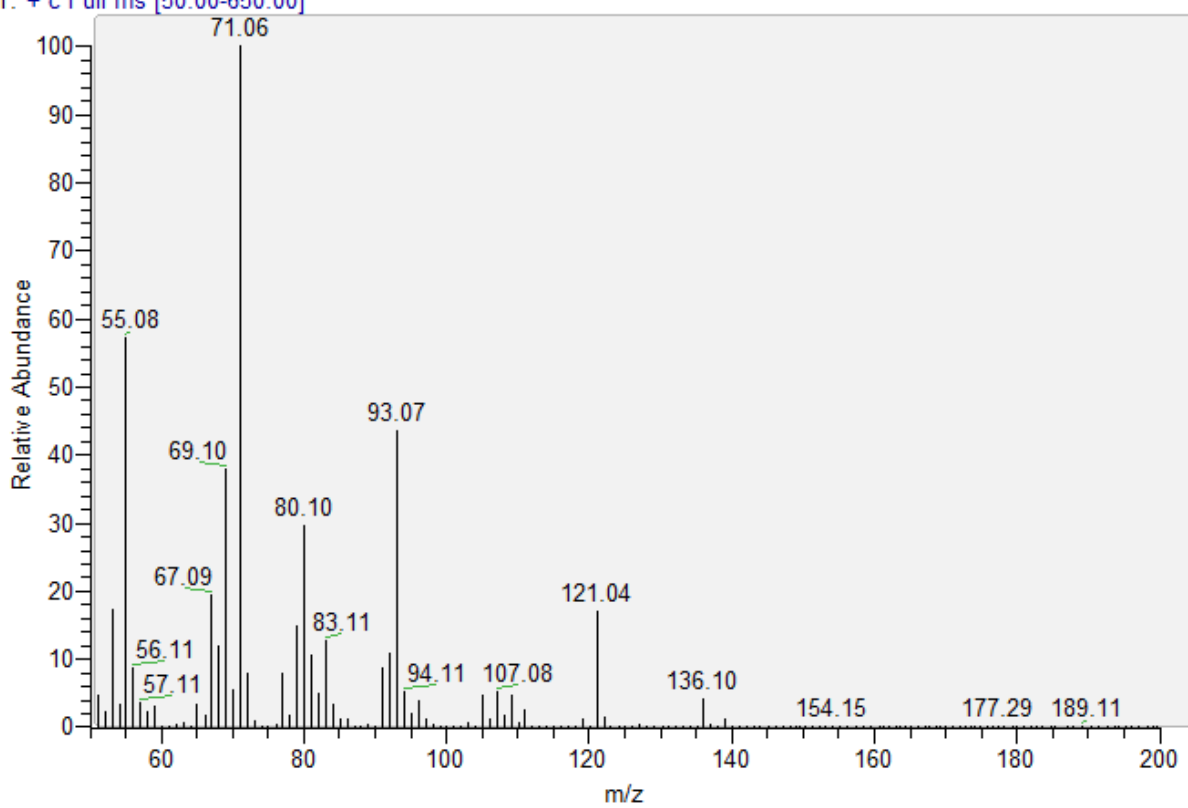

3074 #1095-1096 RT: 26.01-26.04 AV: 2 NL: 2.81E7  
T: + c Full ms [50.00-650.00]

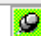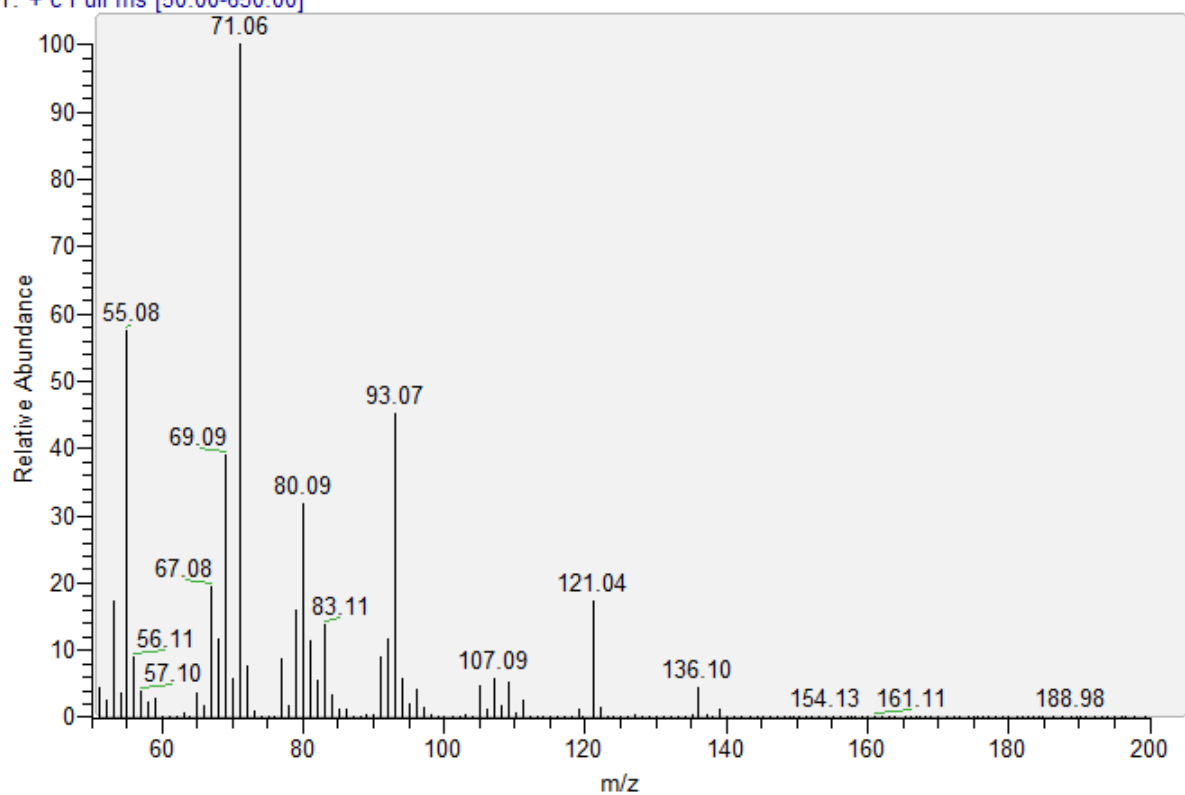

3073 #1094-1095 RT: 26.02-26.04 AV: 2 NL: 3.99E7  
T: + c Full ms [50.00-650.00]

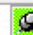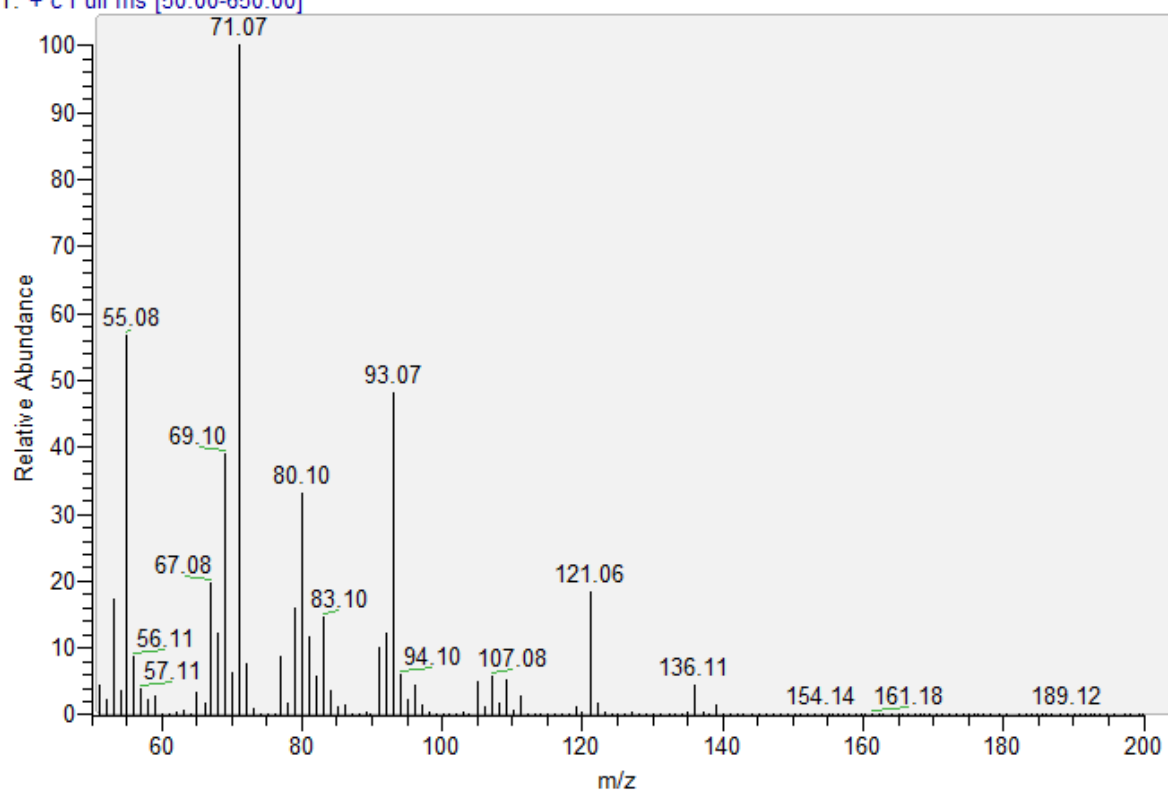

3073 #1094-1095 RT: 26.02-26.04 AV: 2 NL: 3.99E7  
T: + c Full ms [50.00-650.00]

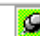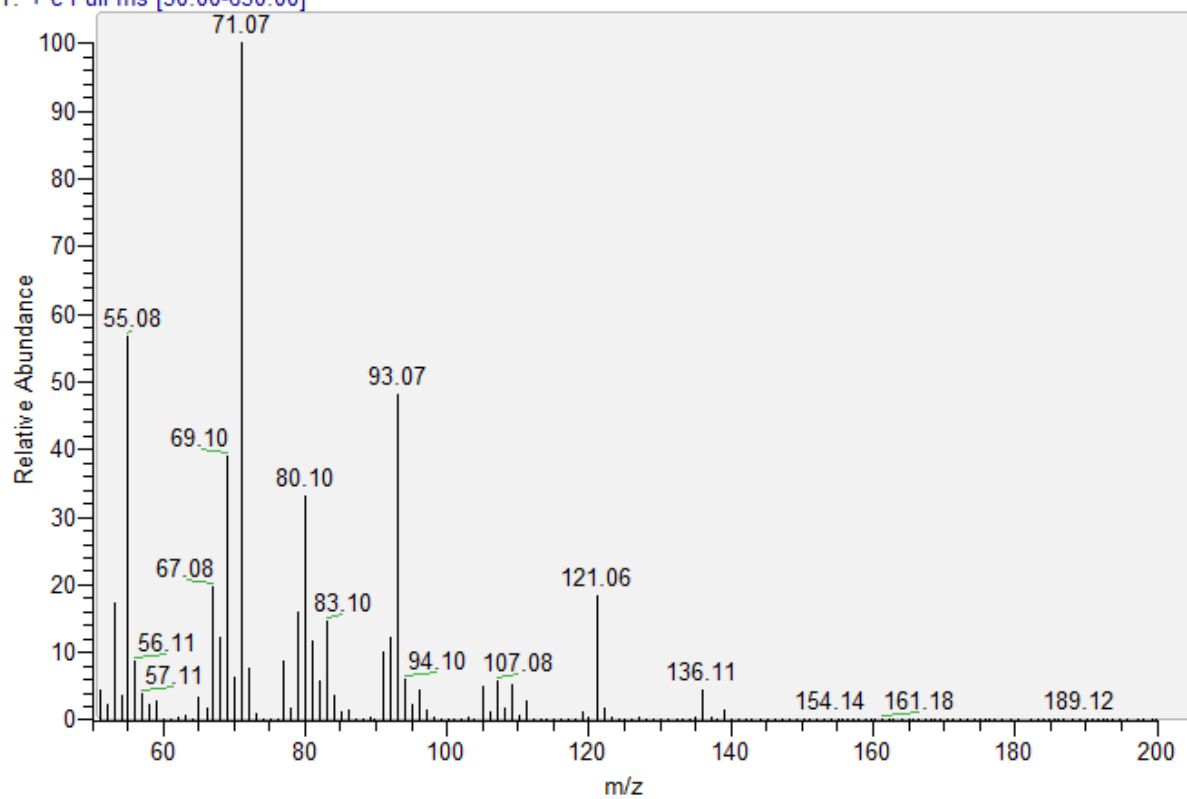

3072 #1093-1094 RT: 26.02-26.04 AV: 2 NL: 5.89E7

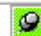

T: + c Full ms [50.00-650.00]

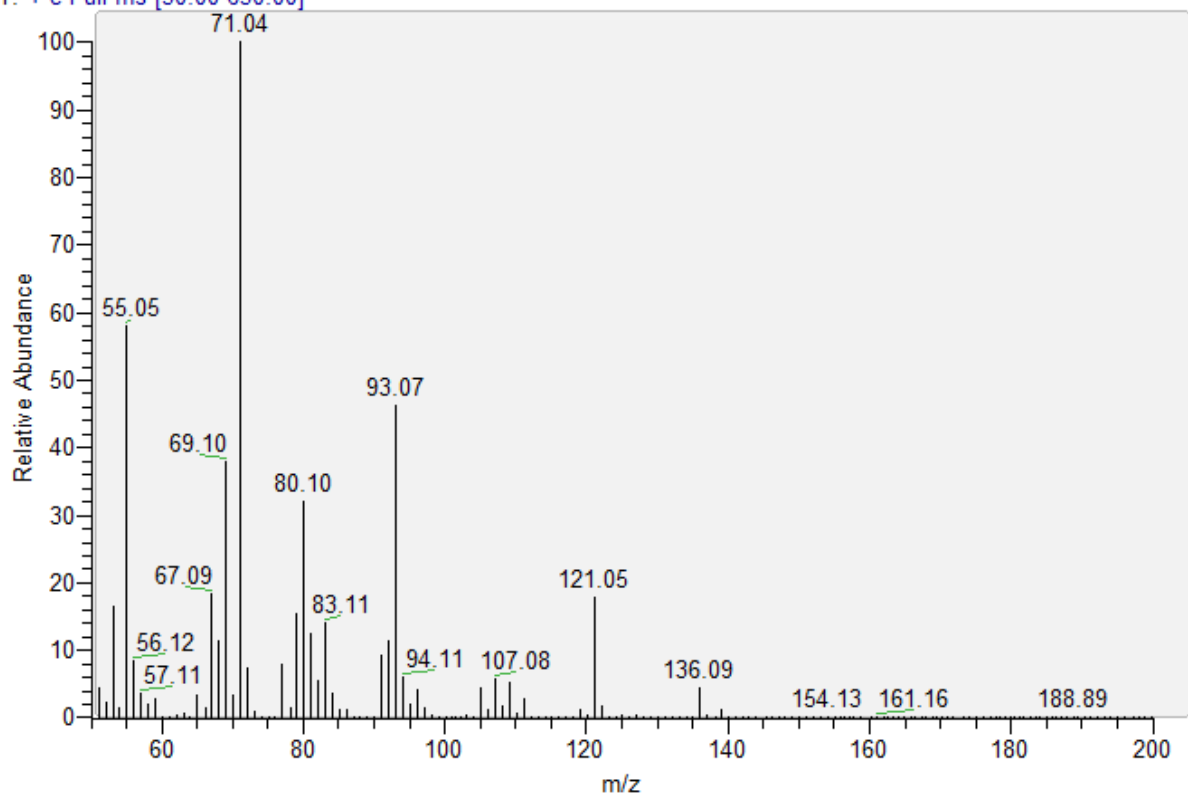



3070 #1094-1095 RT: 25.99-26.01 AV: 2 NL: 5.08E6

T: + c Full ms [50.00-650.00]

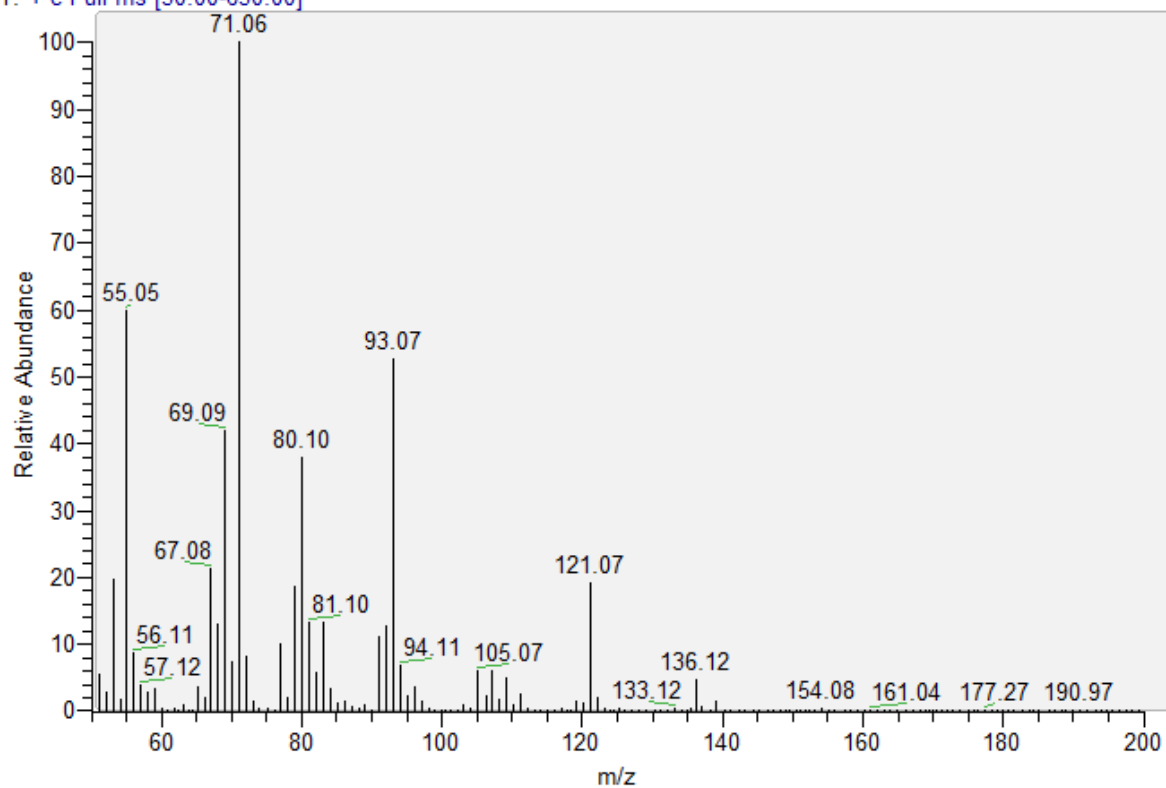

# Beta Caryophyllene

Reference:

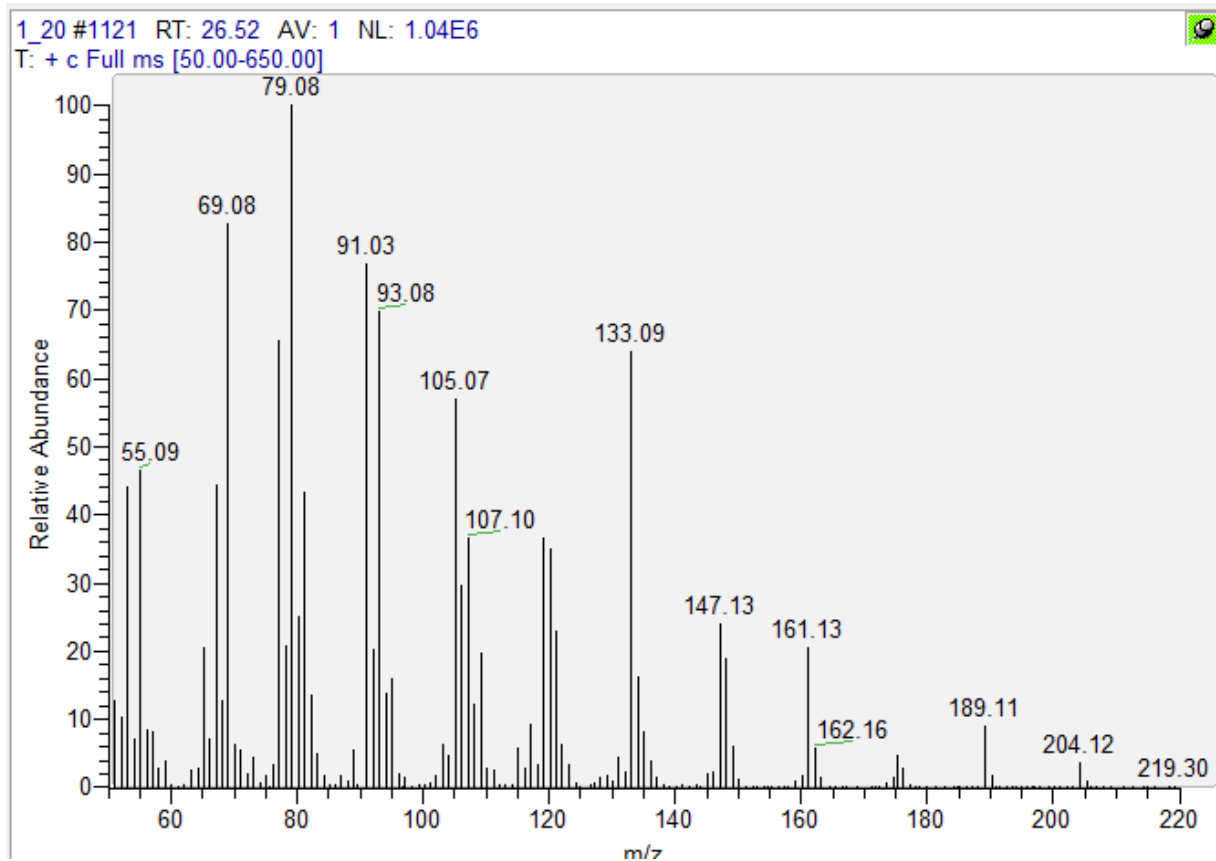

Samples:

3021 #1117-1118 RT: 26.55-26.57 AV: 2 NL: 1.27E7  
T: + c Full ms [50.00-650.00]

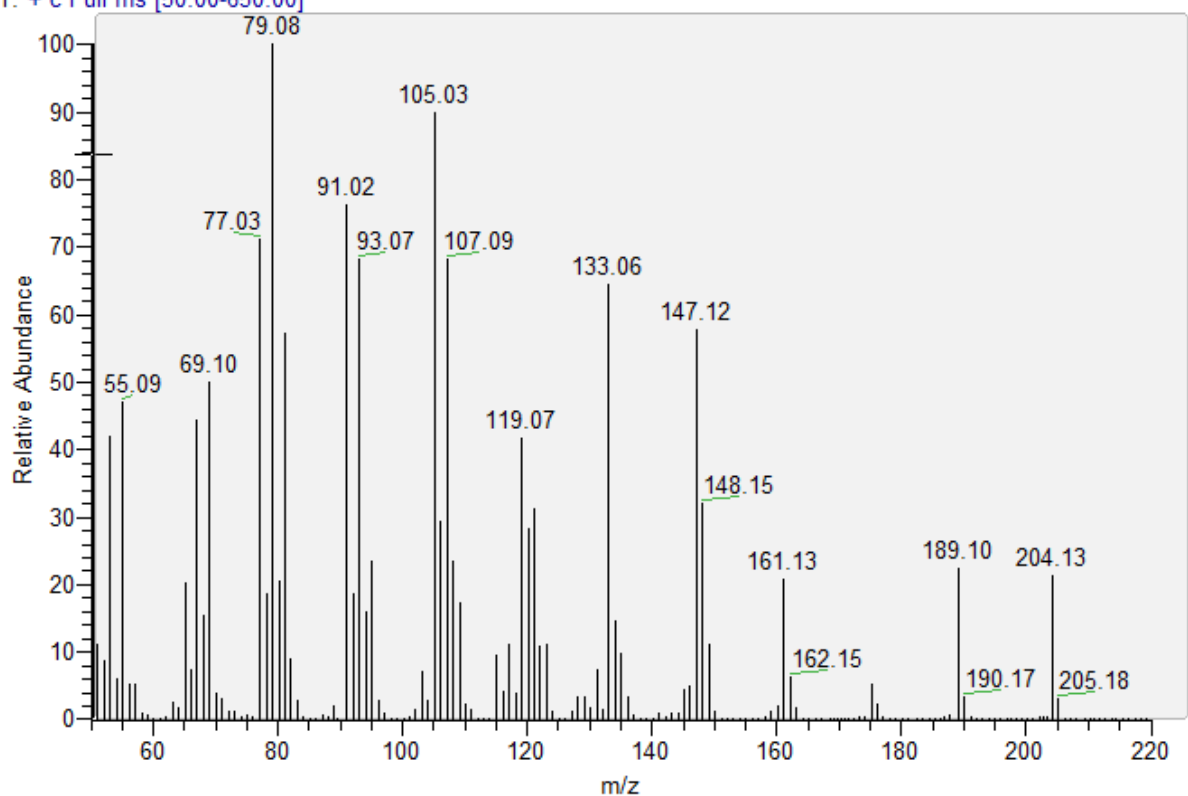

3057 #1121-1122 RT: 26.55-26.58 AV: 2 NL: 1.37E7  
T: + c Full ms [50.00-650.00]

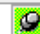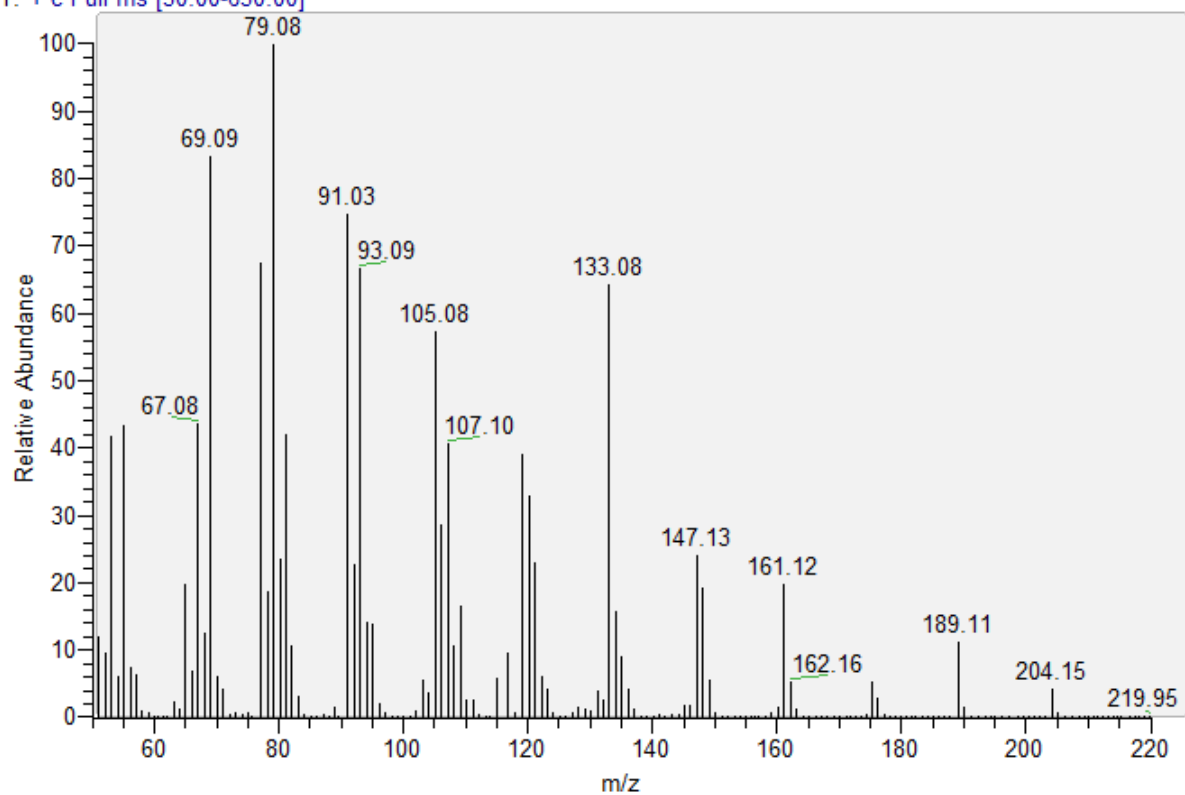

3058 #1116-1118 RT: 26.61-26.66 AV: 3 NL: 1.89E7  
T: + c Full ms [50.00-650.00]

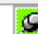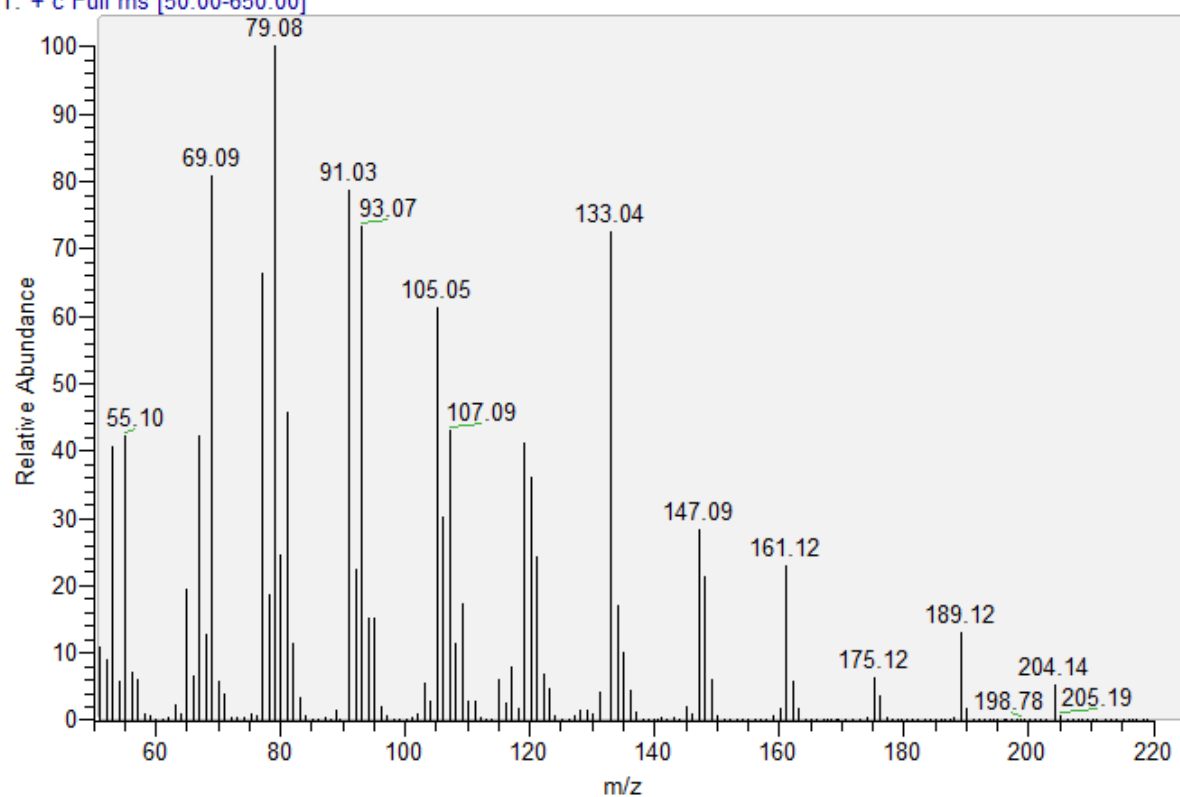

3053 #1115-1117 RT: 26.51-26.56 AV: 3 NL: 9.78E5

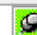

T: + c Full ms [50.00-650.00]

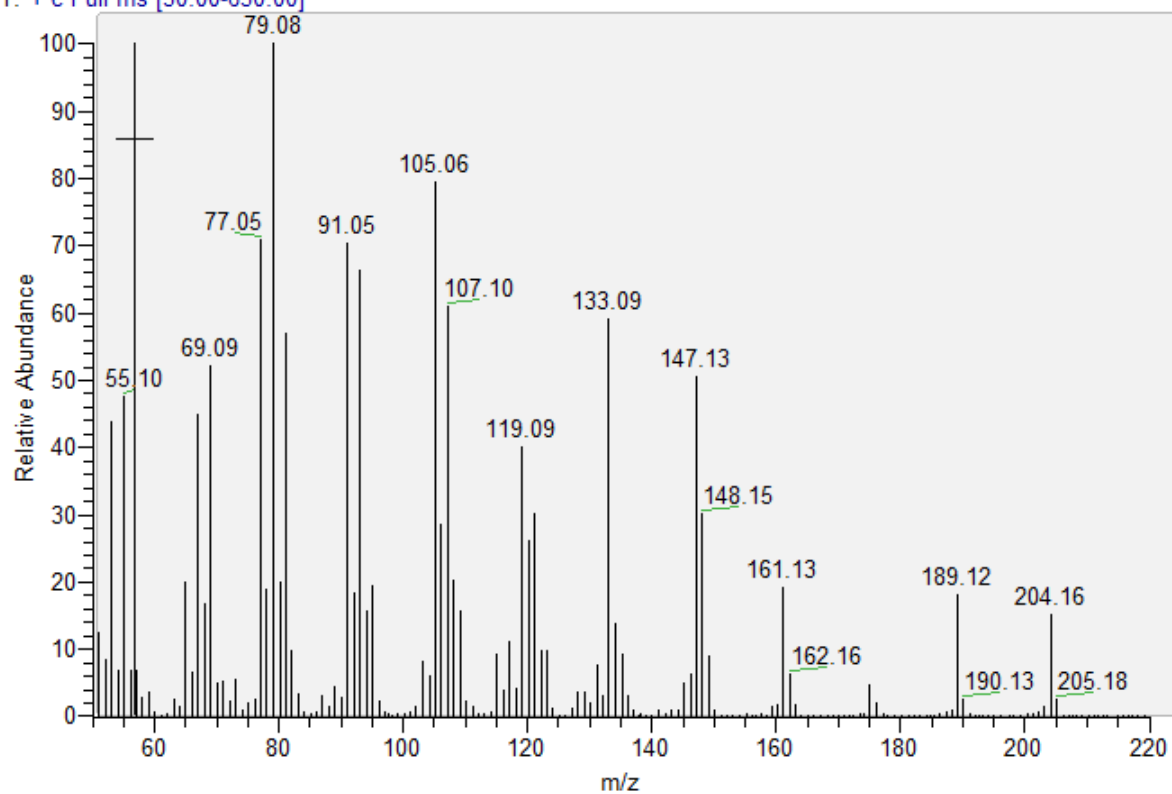

3018 #1120-1121 RT: 26.53-26.56 AV: 2 NL: 1.03E7  
T: + c Full ms [50.00-650.00]

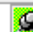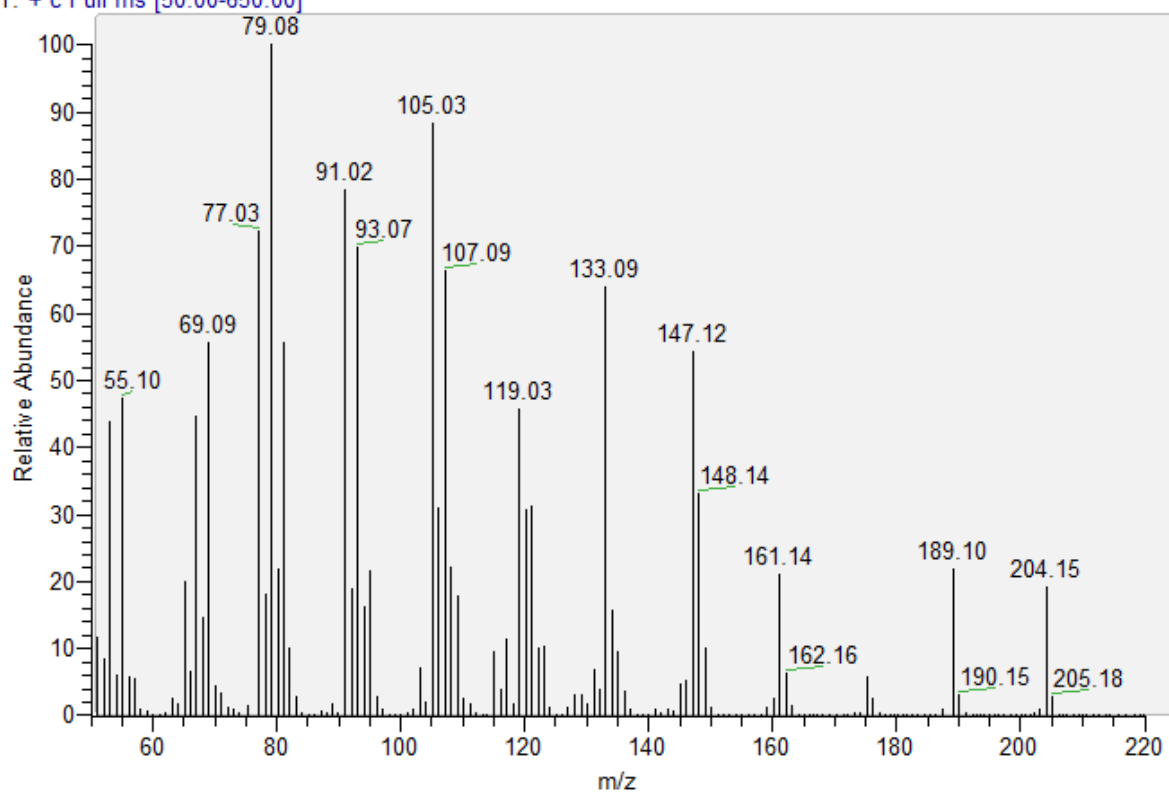

3075 #1115-1116 RT: 26.54-26.56 AV: 2 NL: 1.15E7  
T: + c Full ms [50.00-650.00]

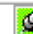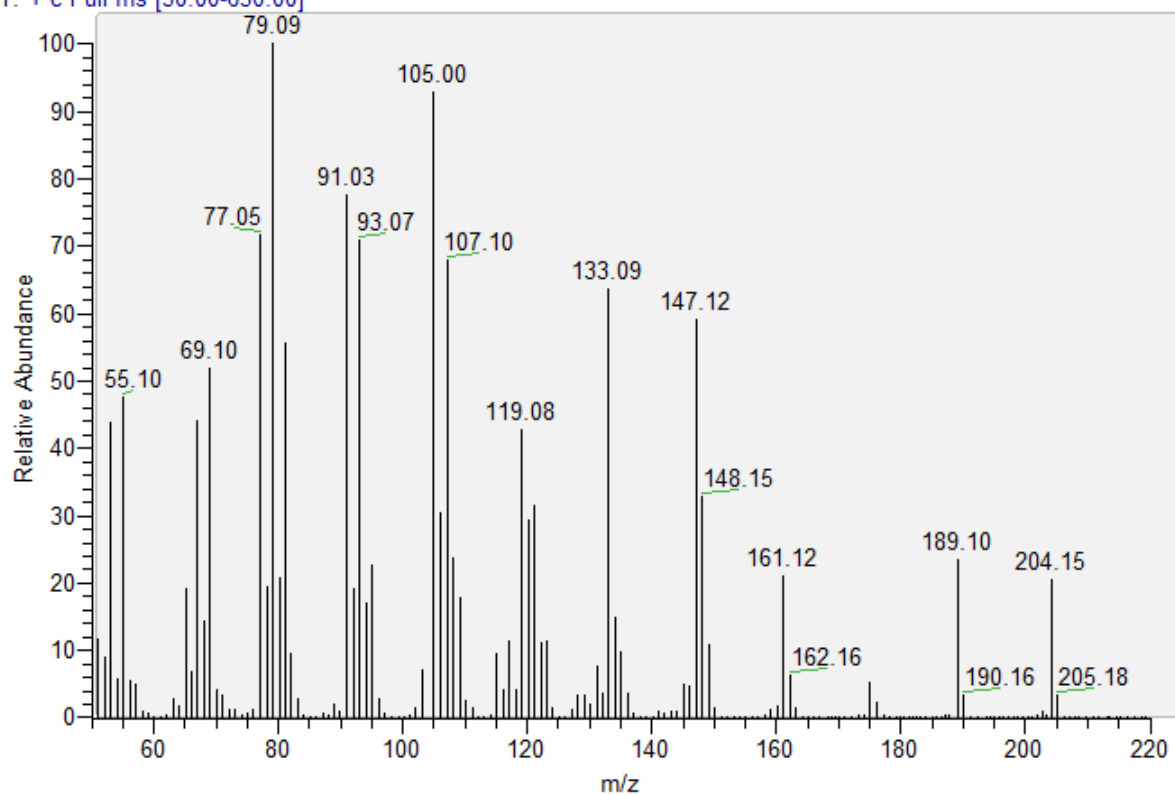



3074 #1117-1118 RT: 26.54-26.56 AV: 2 NL: 1.71E7  
T: + c Full ms [50.00-650.00]

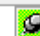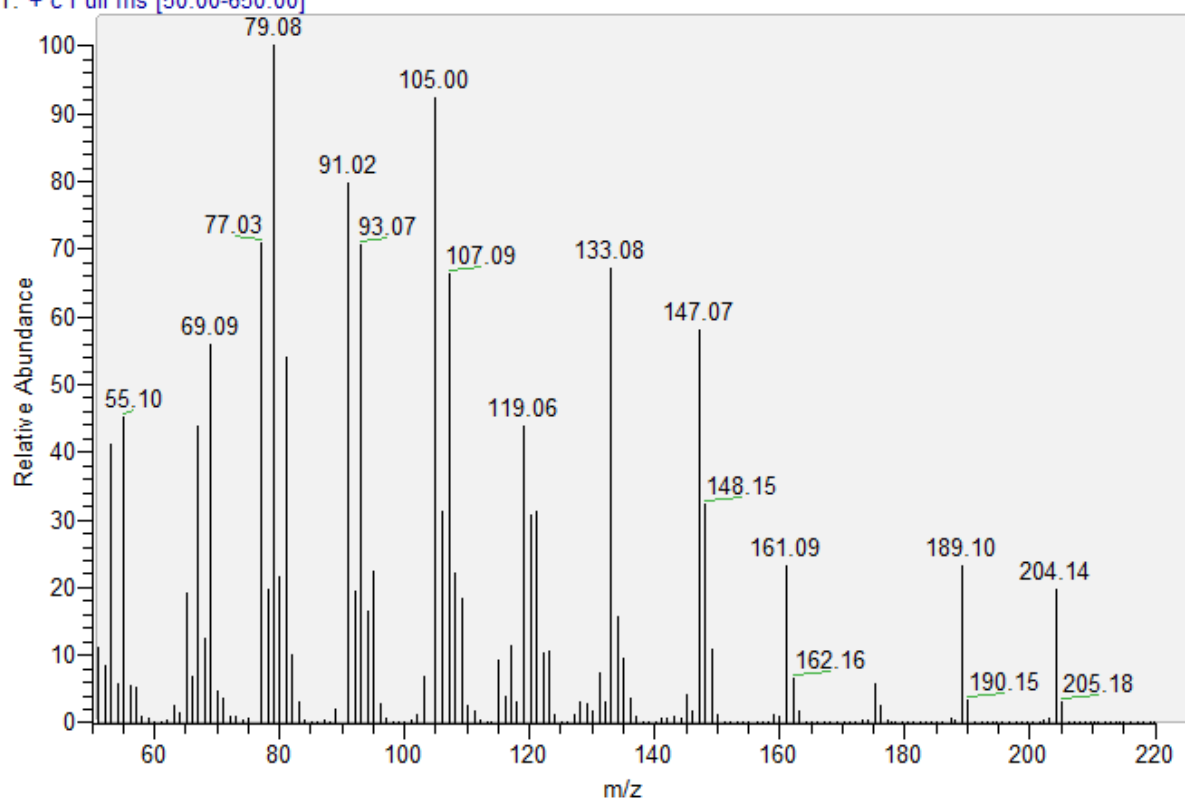

3073 #1115-1116 RT: 26.52-26.54 AV: 2 NL: 5.80E6  
T: + c Full ms [50.00-650.00]

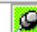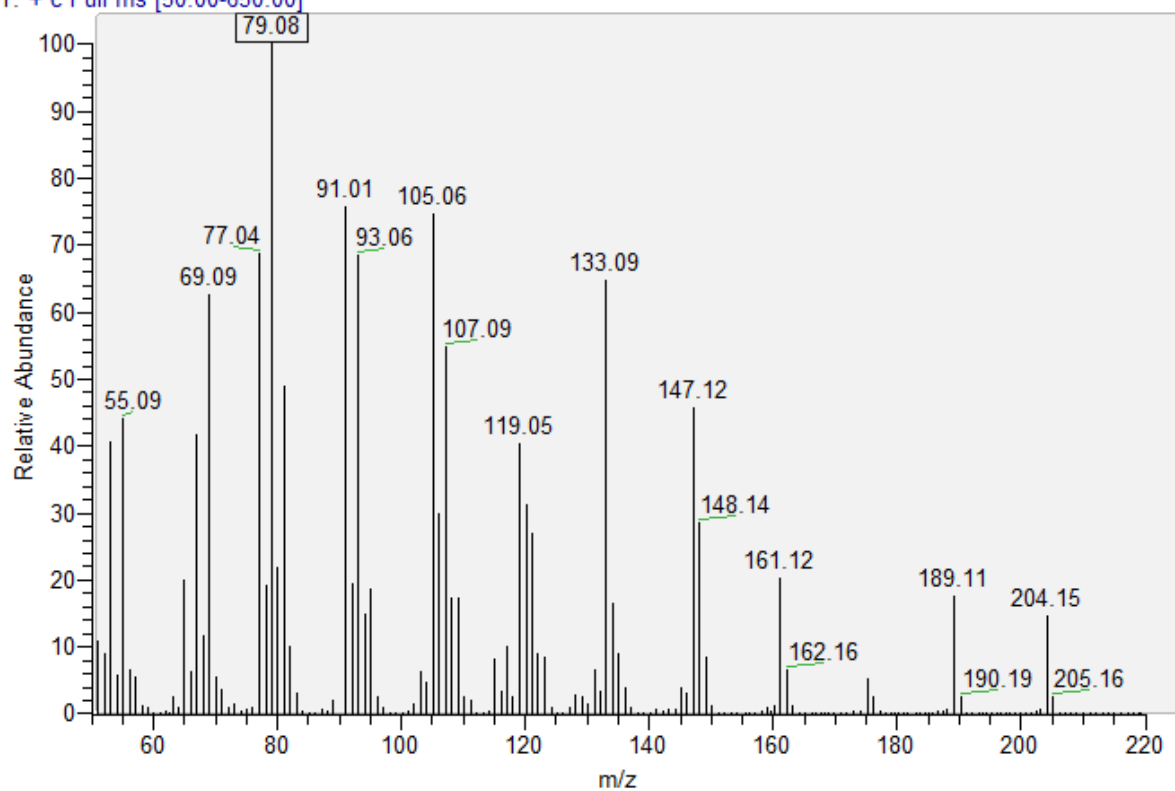

3073 #1115-1116 RT: 26.52-26.54 AV: 2 NL: 5.80E6  
T: + c Full ms [50.00-650.00]

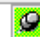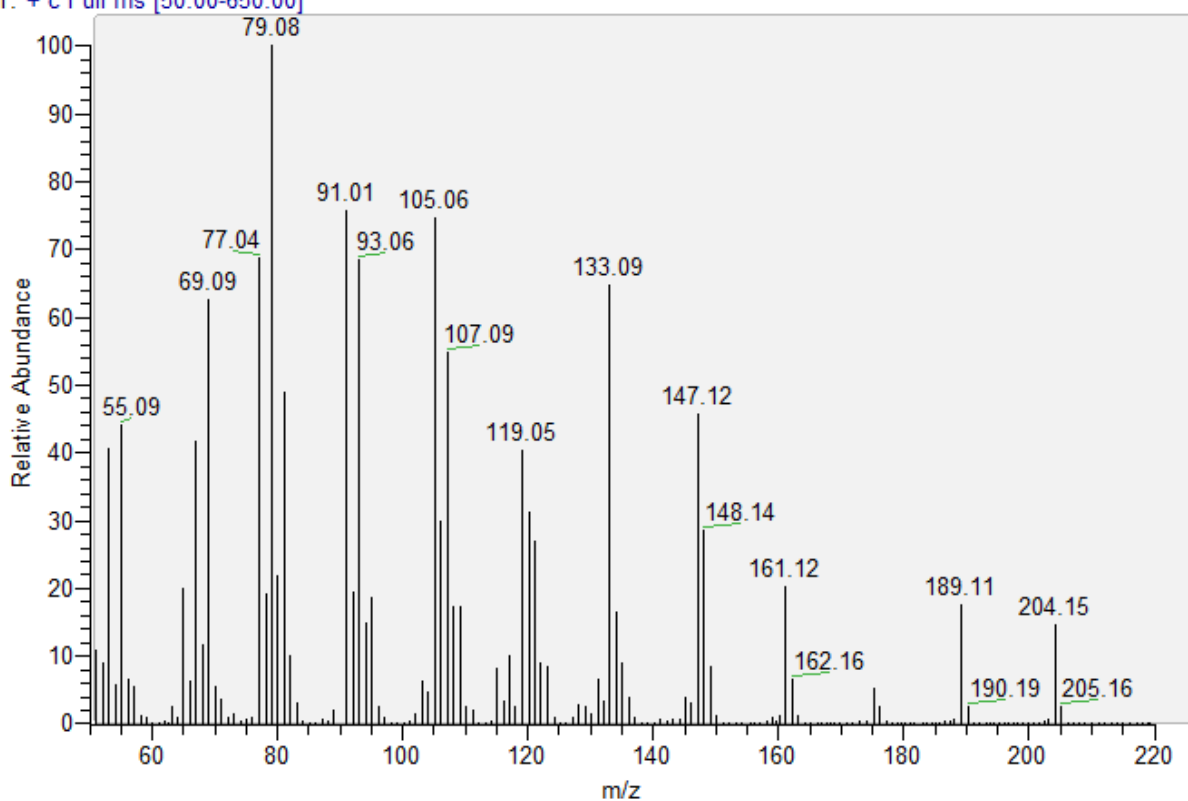

3072 #1115 RT: 26.54 AV: 1 NL: 1.09E7  
T: + c Full ms [50.00-650.00]

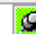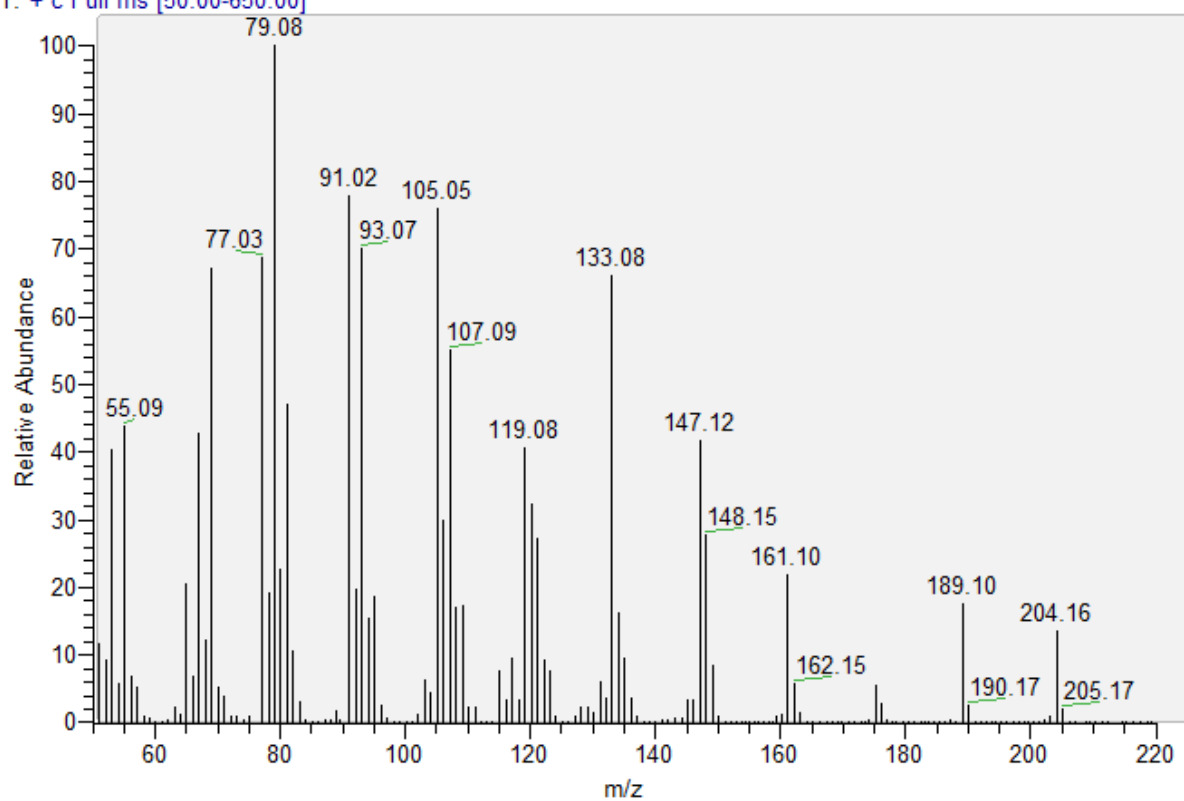

3070 #1116-1117 RT: 26.52-26.54 AV: 2 NL: 9.15E5  
T: + c Full ms [50.00-650.00]

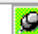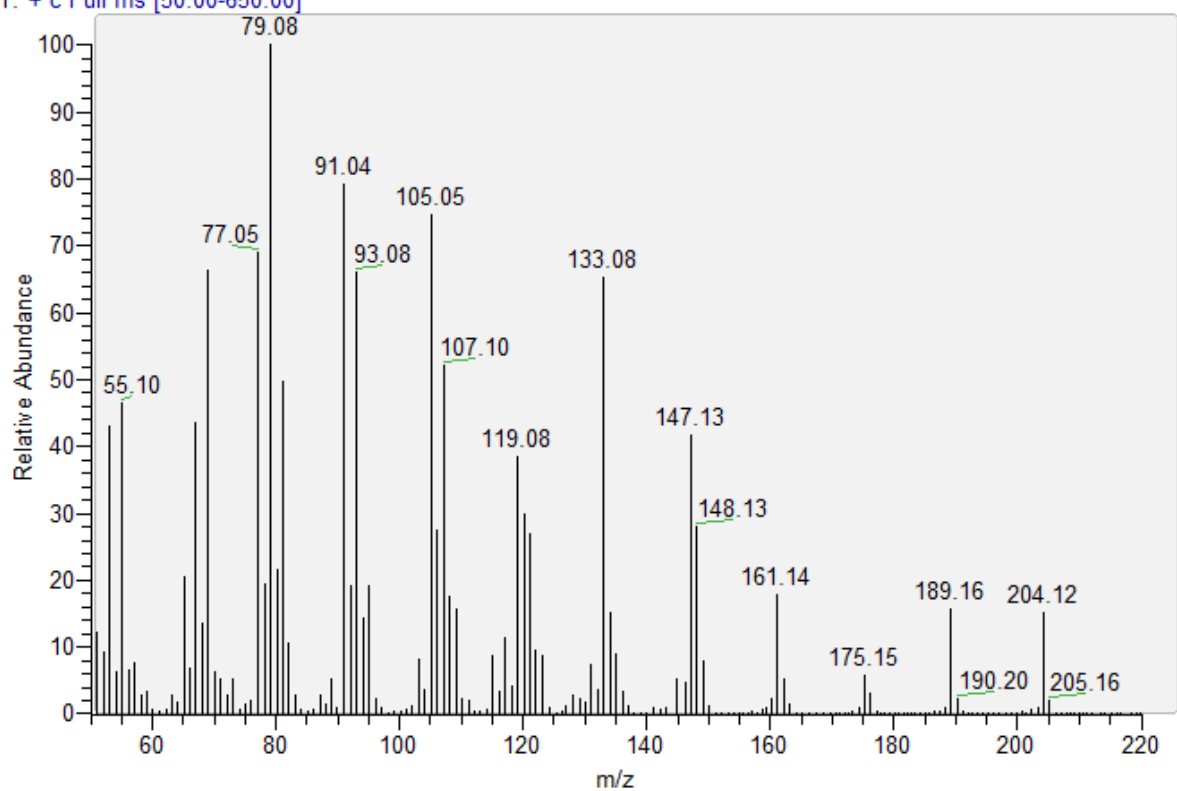

Beta damascenone:

Reference:

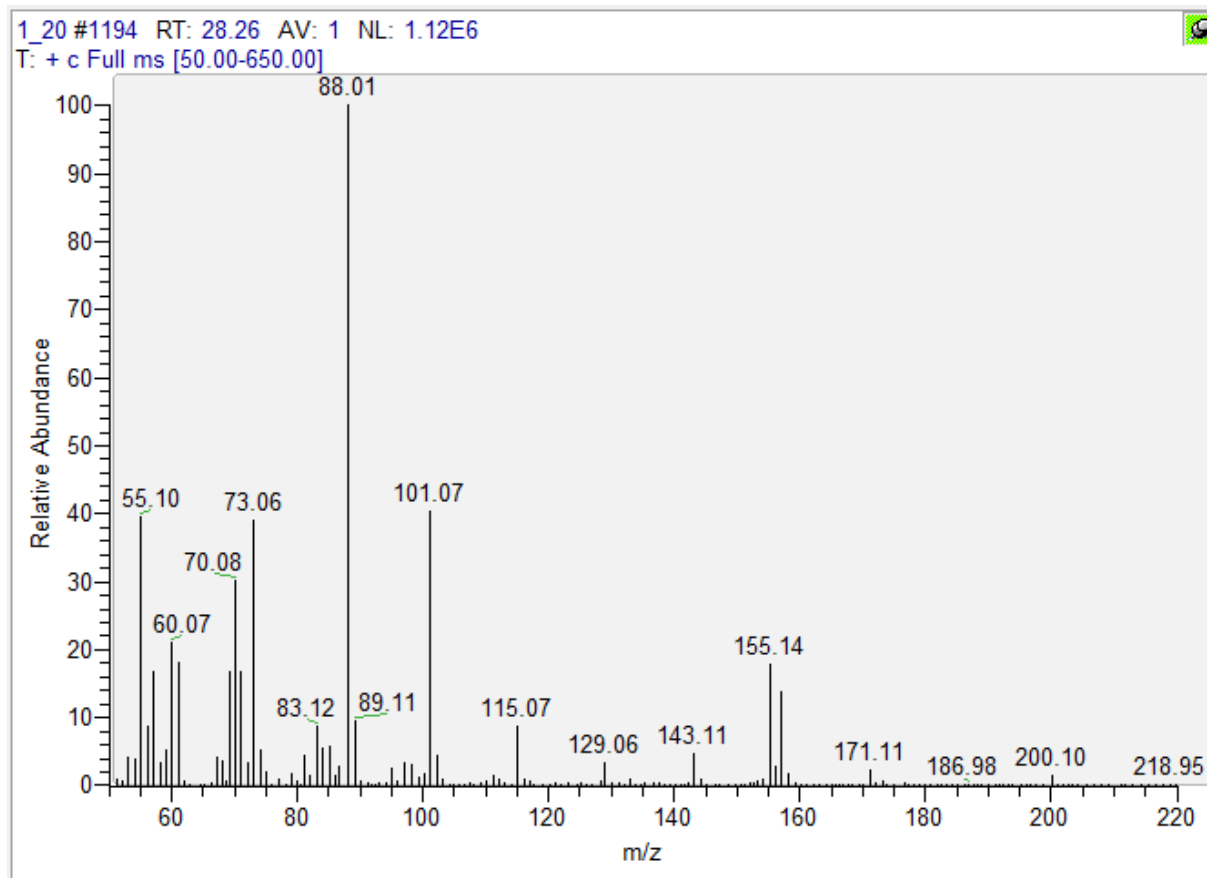

Samples:

Not detected in any samples.

Citronellyl acetate

Reference

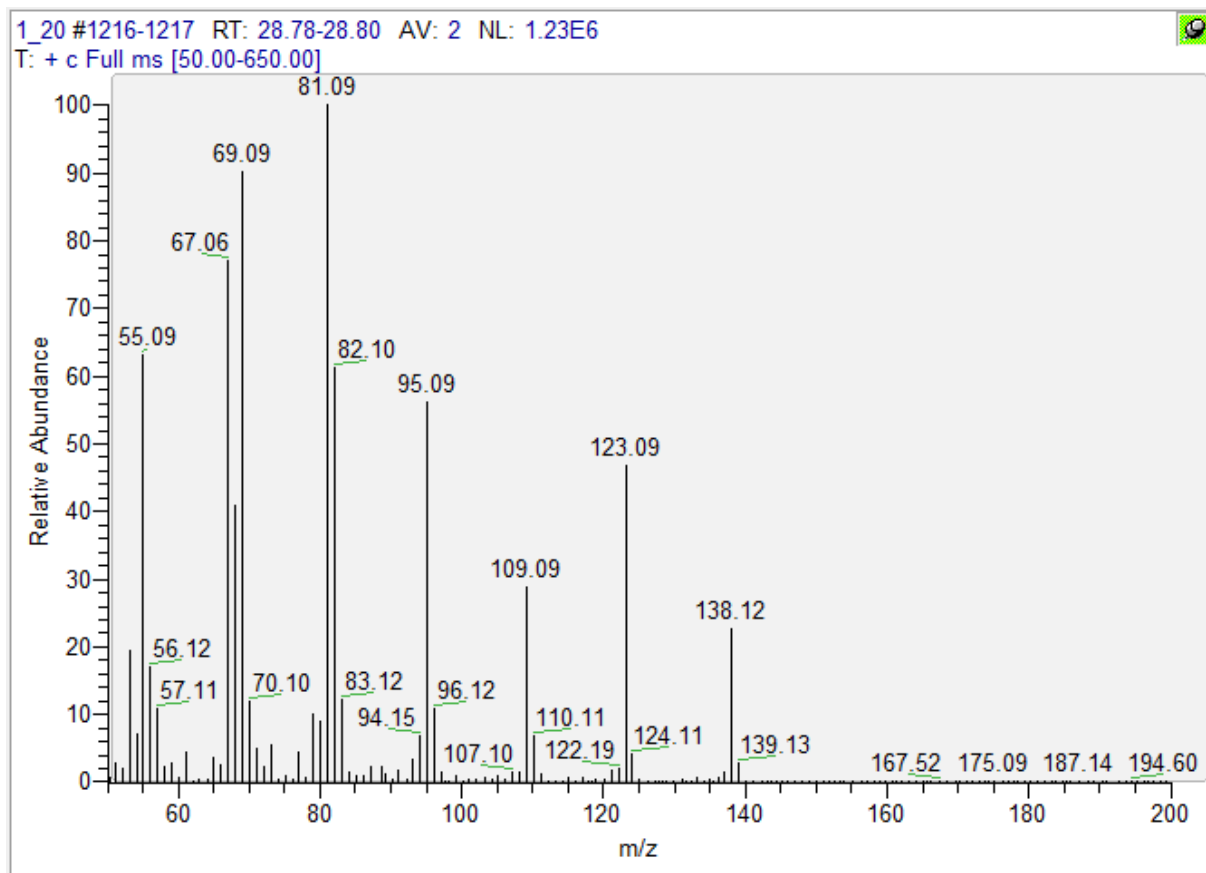

Samples:

3057 #1215-1217 RT: 28.79-28.84 AV: 3 NL: 8.81E6

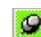

T: + c Full ms [50.00-650.00]

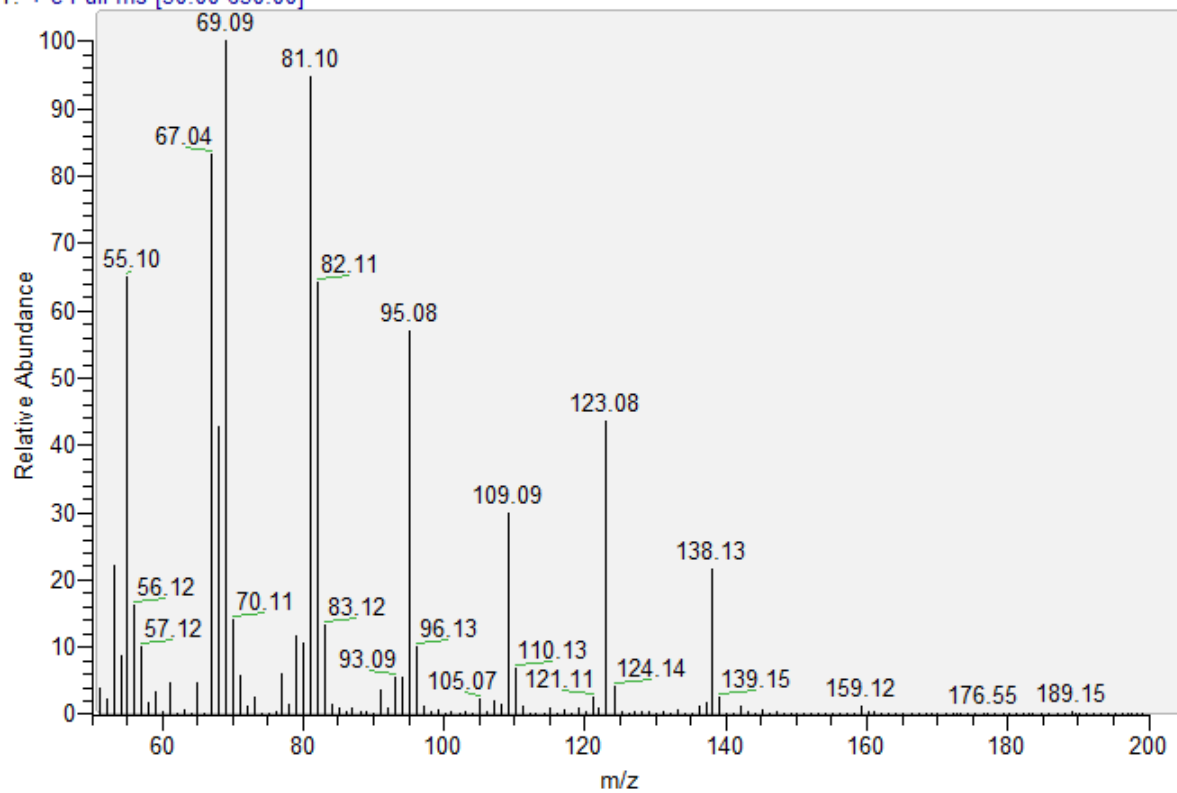



3058 #1209-1211 RT: 28.83-28.88 AV: 3 NL: 1.74E7  
T: + c Full ms [50.00-650.00]

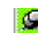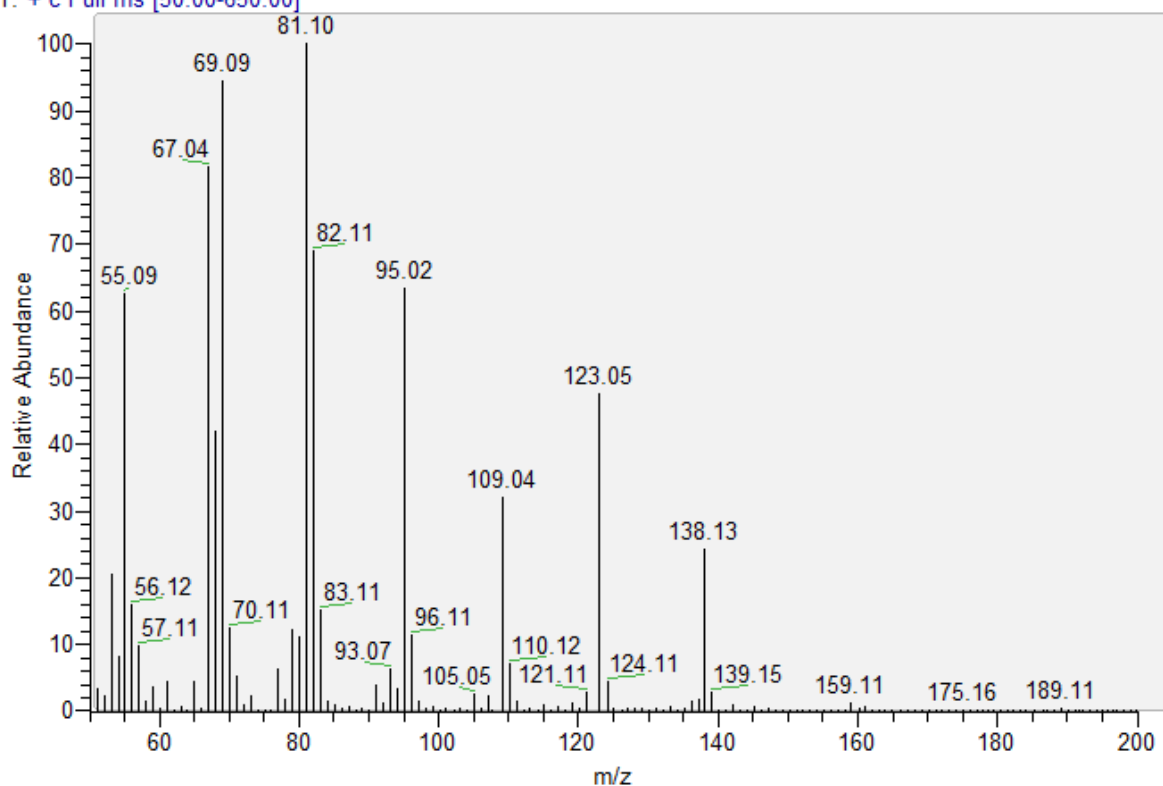

3053 #1210-1212 RT: 28.78-28.83 AV: 3 NL: 1.21E6  
T: + c Full ms [50.00-650.00]

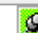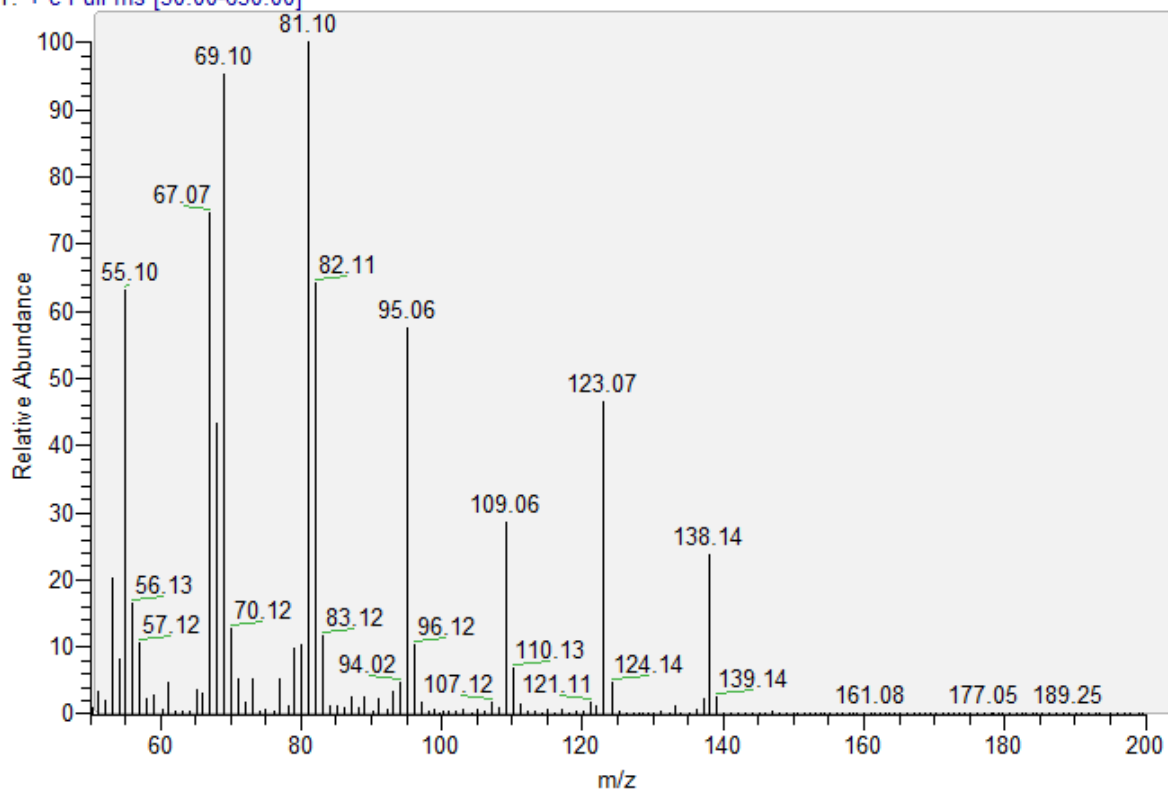

3018 #1216-1217 RT: 28.82-28.84 AV: 2 NL: 1.39E7  
T: + c Full ms [50.00-650.00]

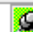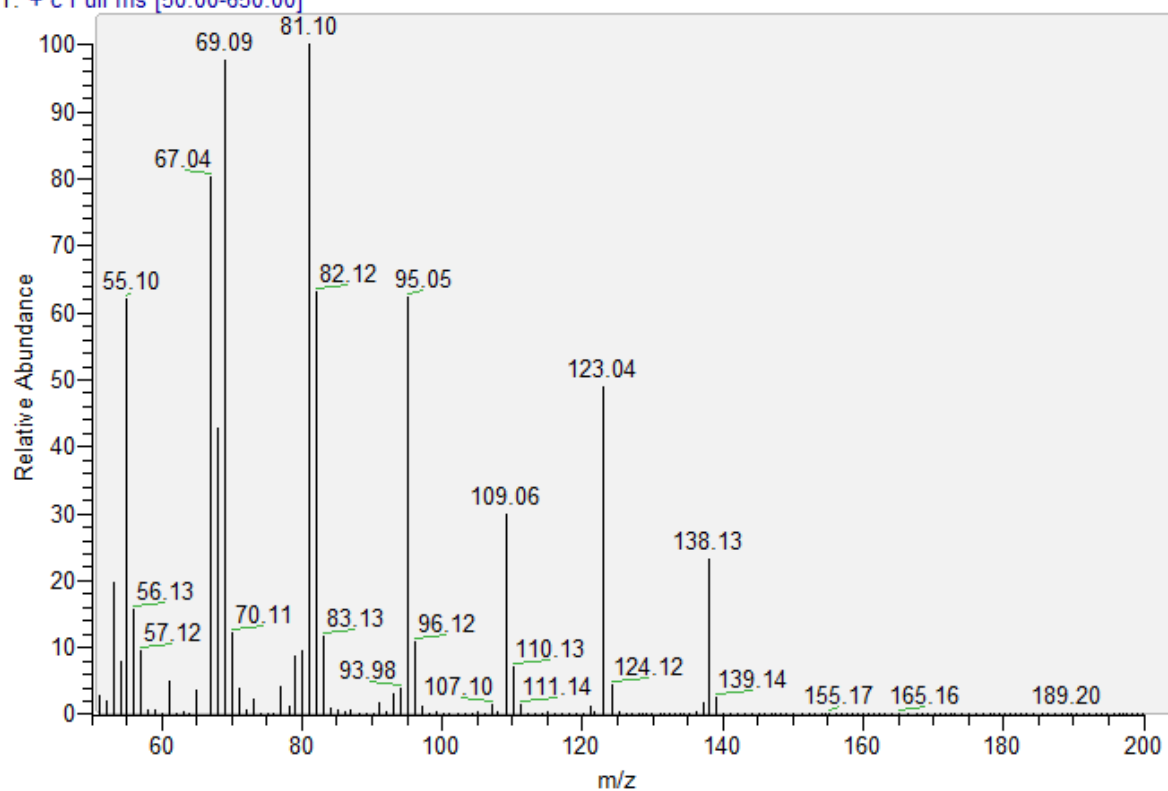

3021 #1212-1213 RT: 28.82-28.84 AV: 2 NL: 2.71E7  
T: + c Full ms [50.00-650.00]

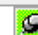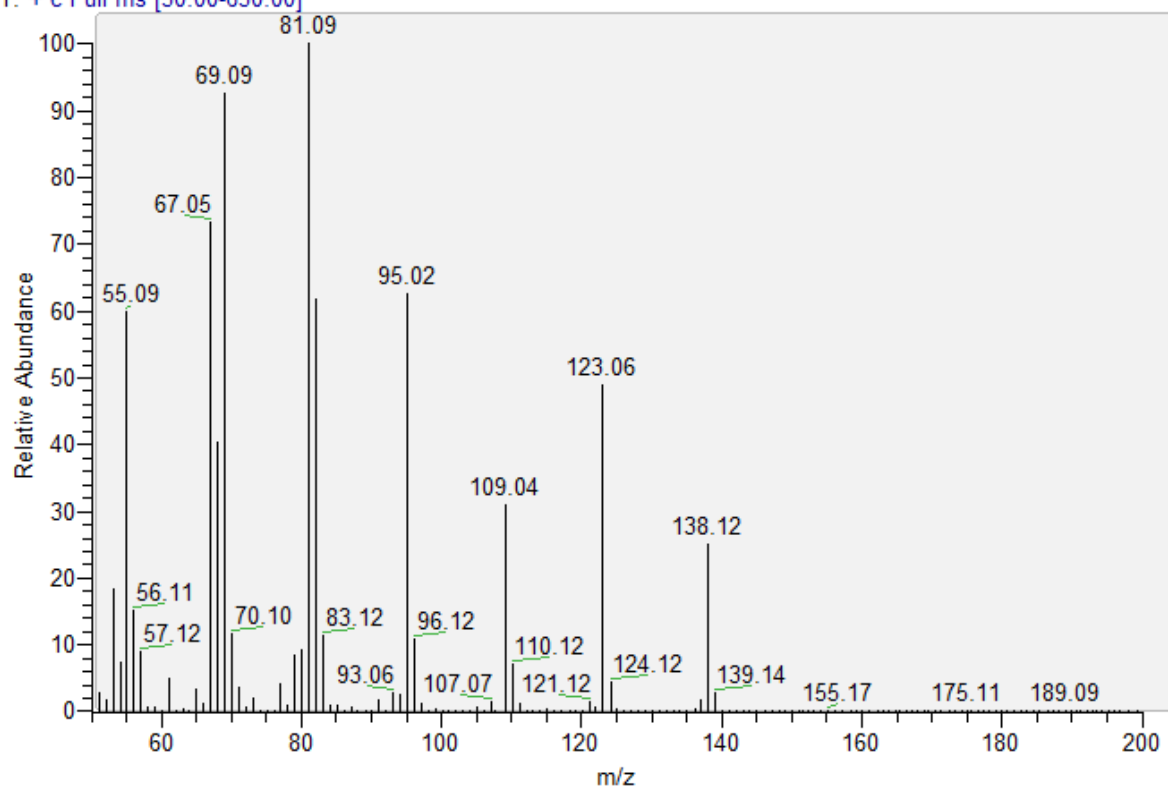

3075 #1210-1211 RT: 28.80-28.83 AV: 2 NL: 1.76E7  
T: + c Full ms [50.00-650.00]

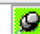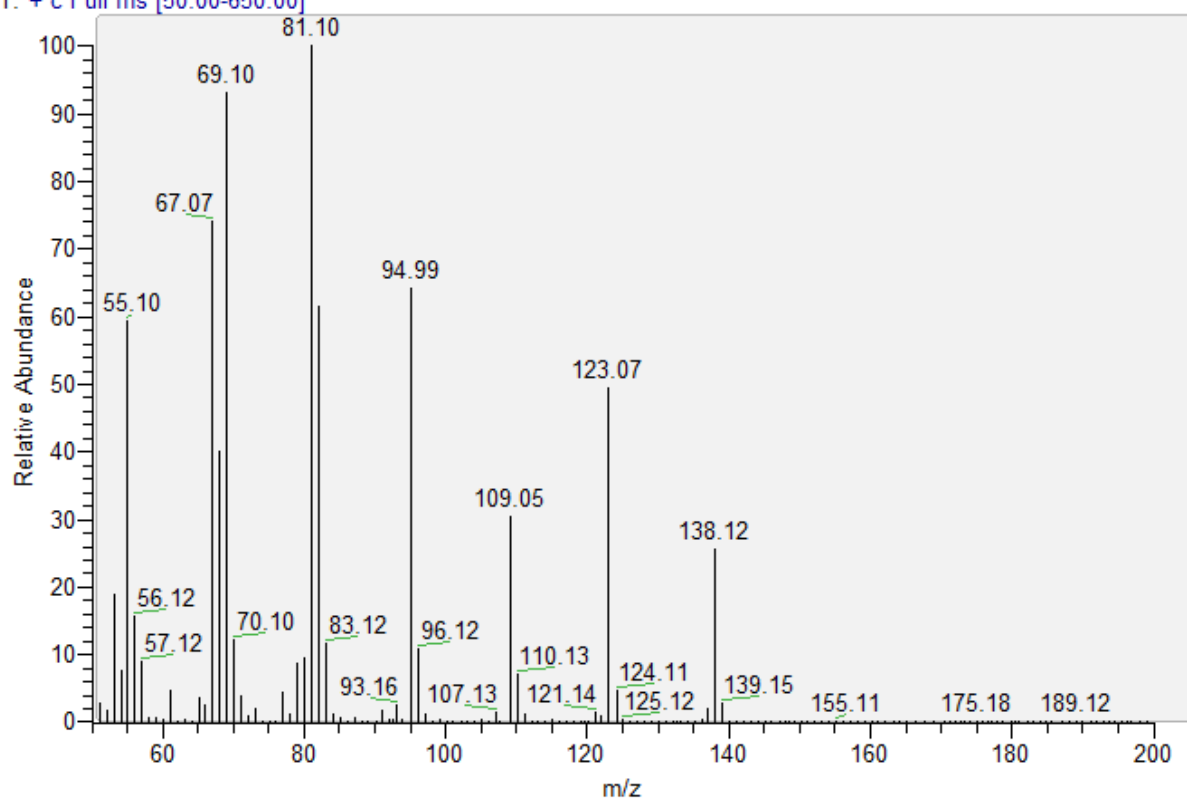

3074 #1213 RT: 28.83 AV: 1 NL: 2.32E7  
T: + c Full ms [50.00-650.00]

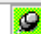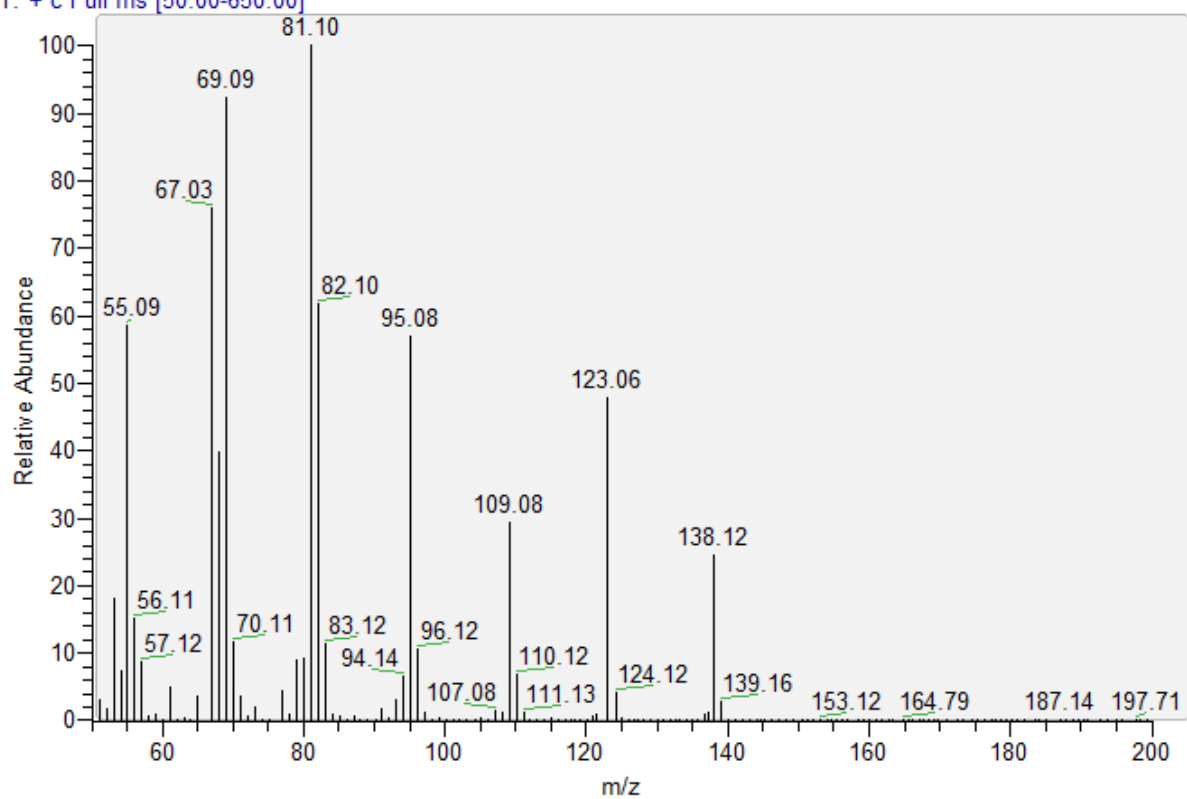

3073 #1211-1212 RT: 28.81-28.84 AV: 2 NL: 7.97E6

T: + c Full ms [50.00-650.00]

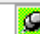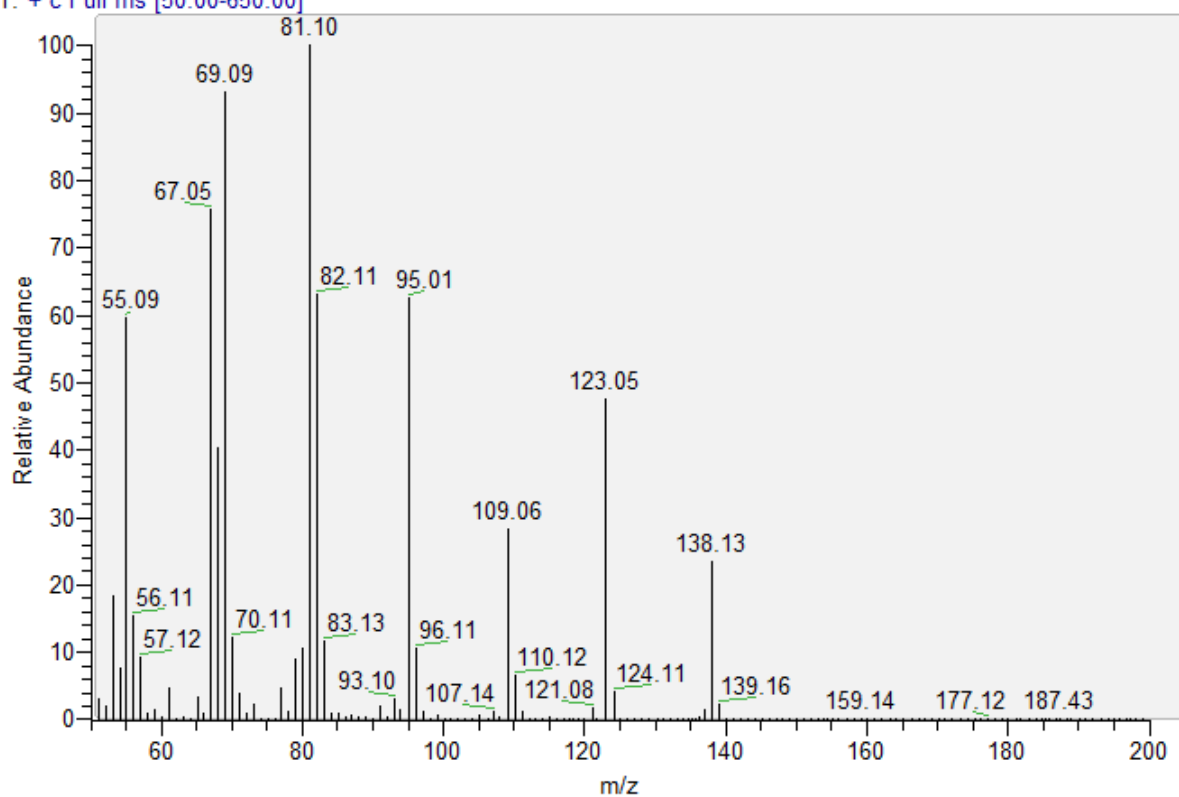

3073 #1211 RT: 28.81 AV: 1 NL: 9.51E6  
T: + c Full ms [50.00-650.00]

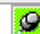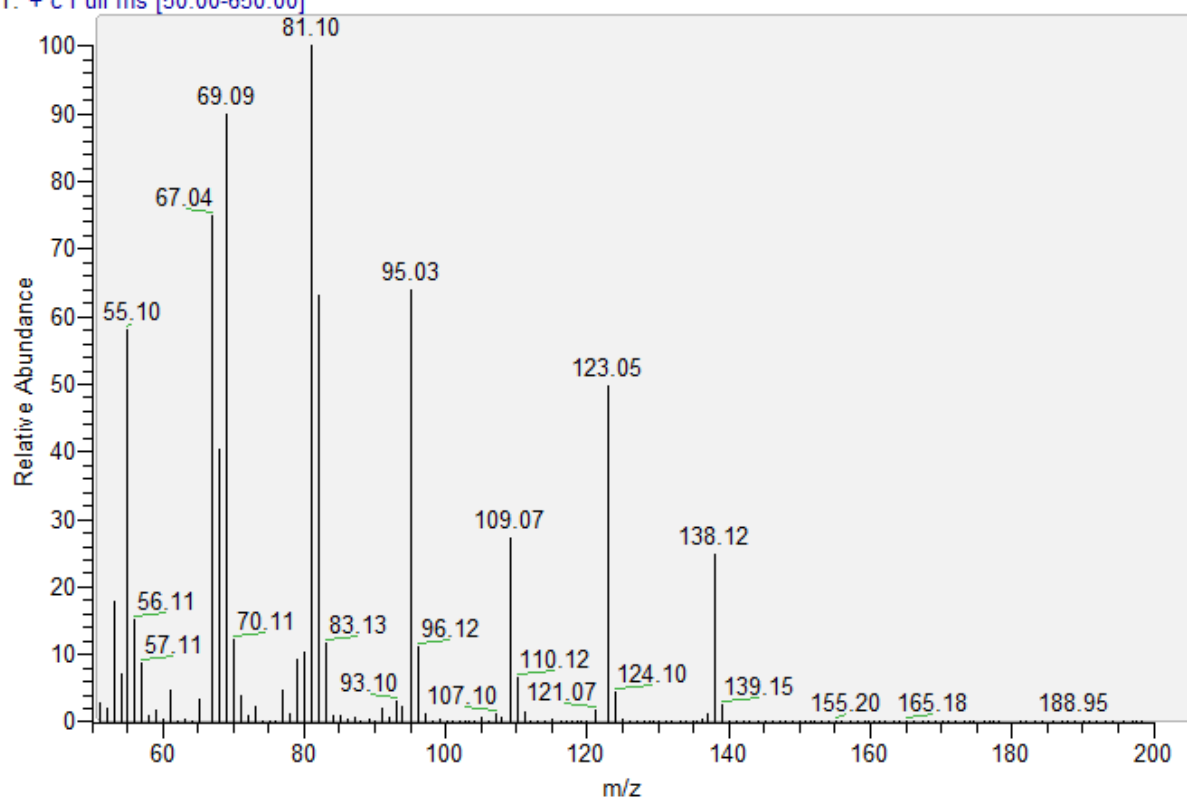

3072 #1210-1211 RT: 28.81-28.84 AV: 2 NL: 8.58E6  
T: + c Full ms [50.00-650.00]

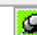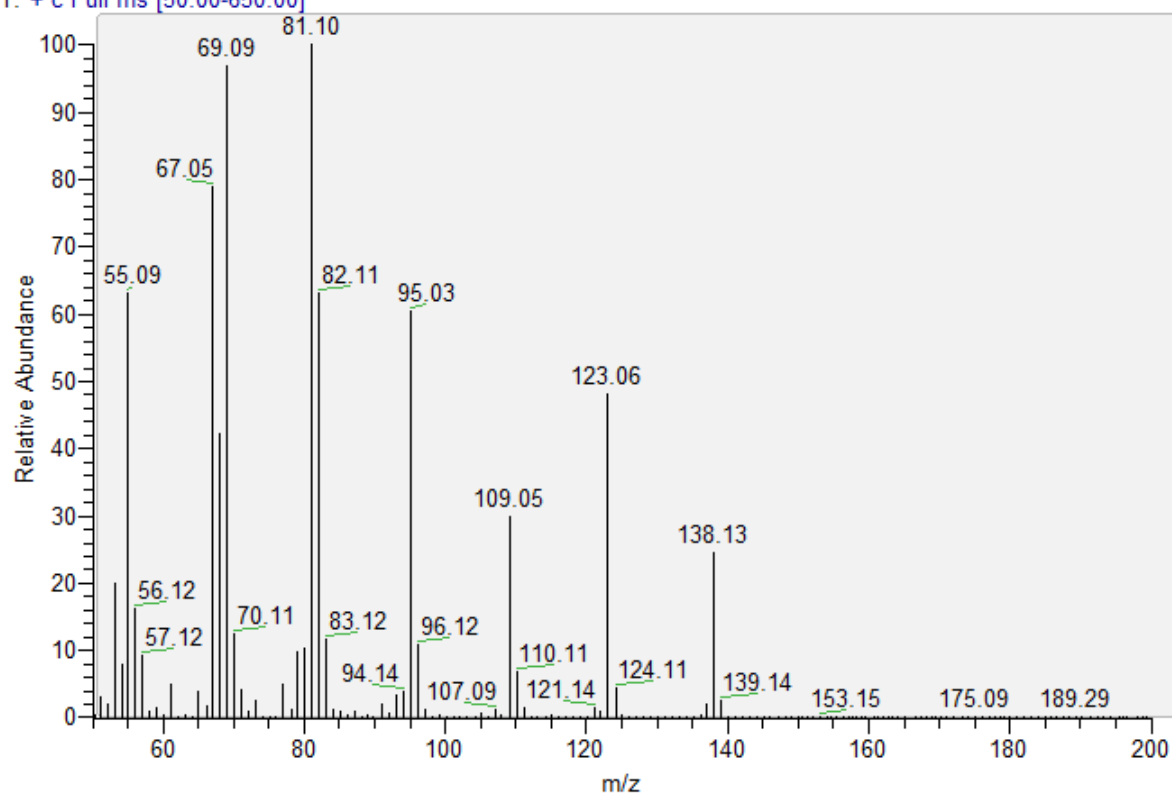



3070 #1212-1213 RT: 28.79-28.82 AV: 2 NL: 8.26E5  
T: + c Full ms [50.00-650.00]

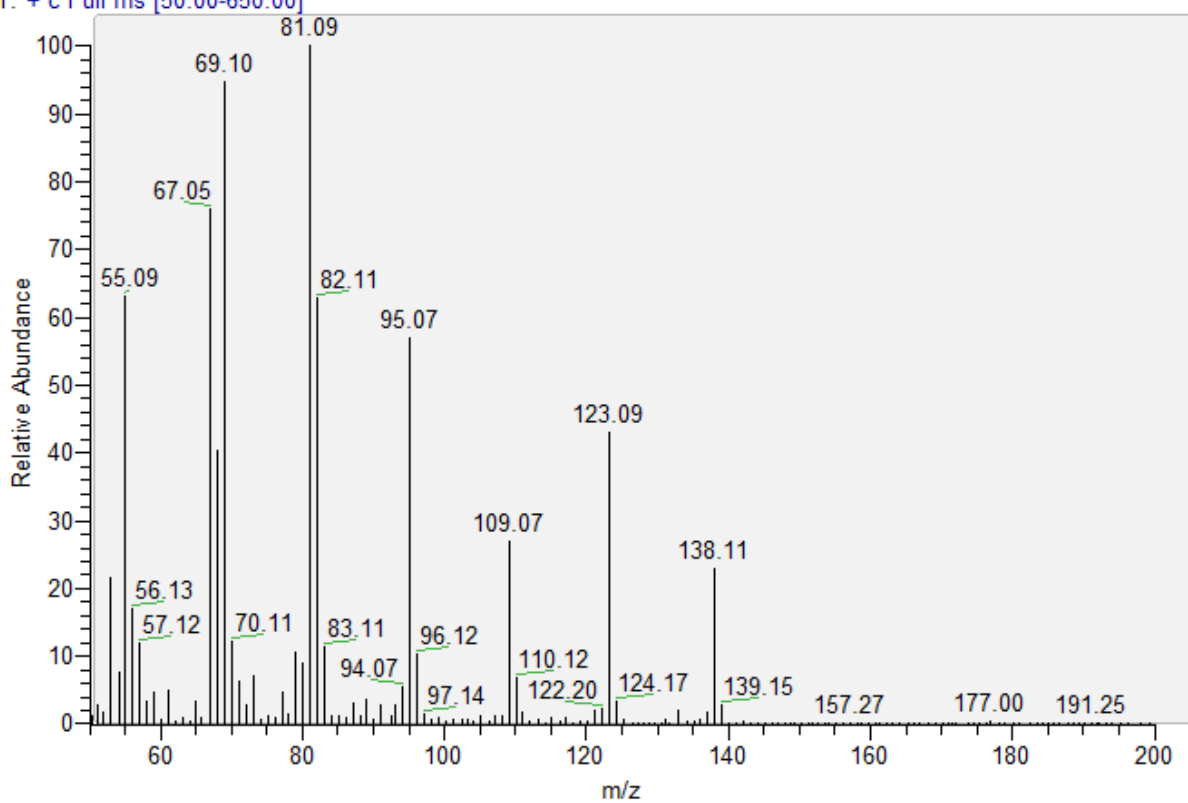

Citral

Reference

1\_20 #1227 RT: 29.04 AV: 1 NL: 1.23E6  
T: + c Full ms [50.00-650.00]

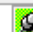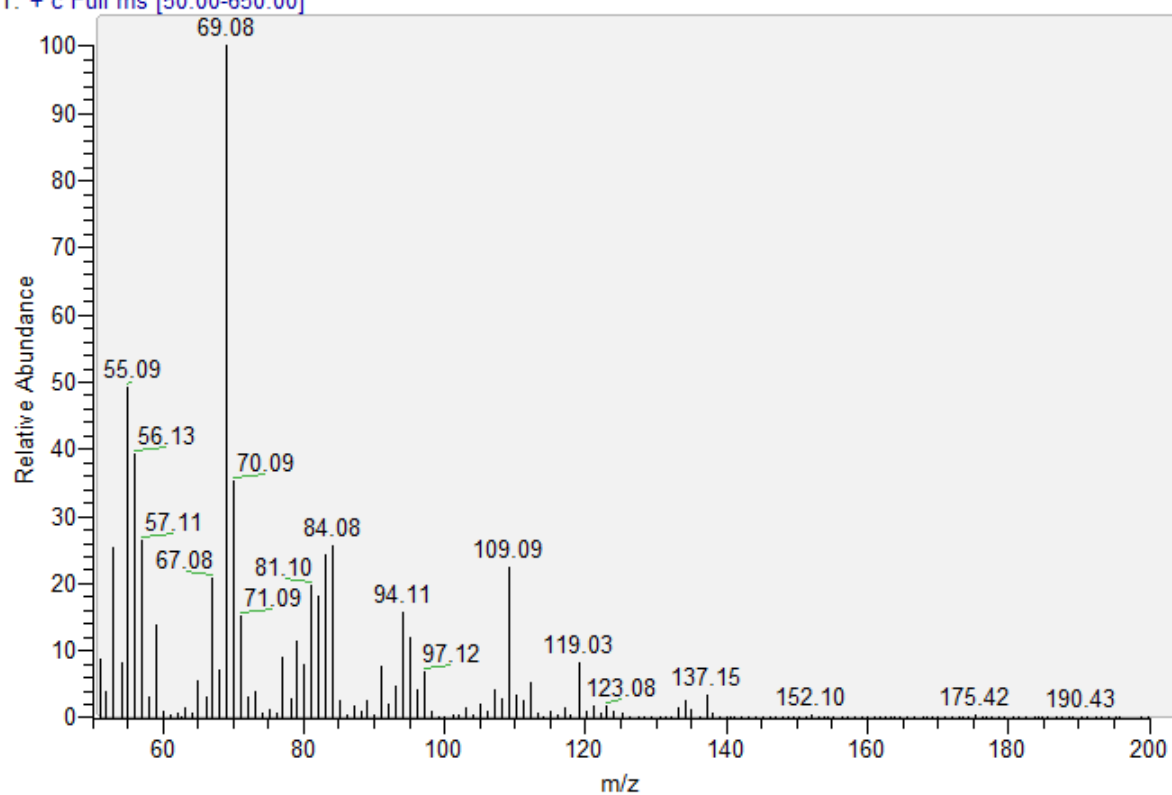

## Samples

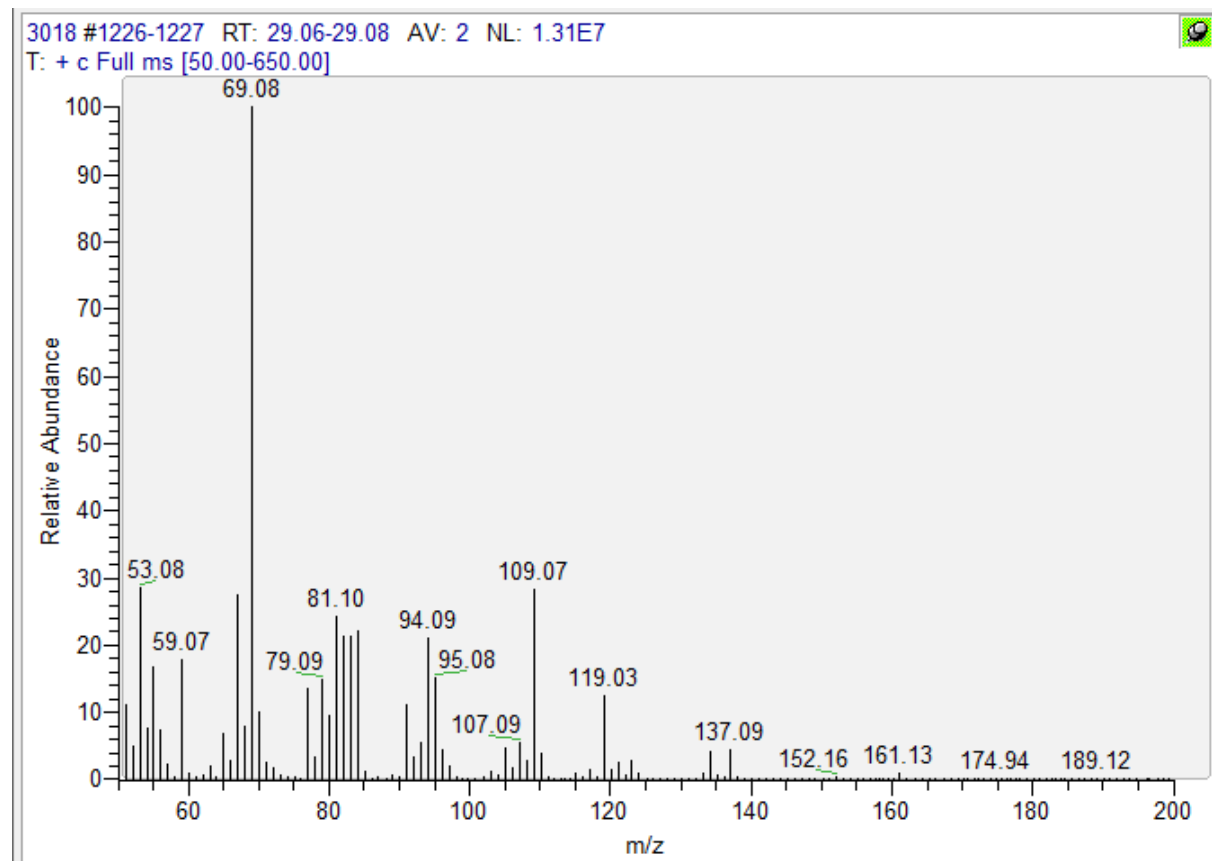

3053 #1221-1222 RT: 29.04-29.06 AV: 2 NL: 1.33E6  
T: + c Full ms [50.00-650.00]

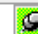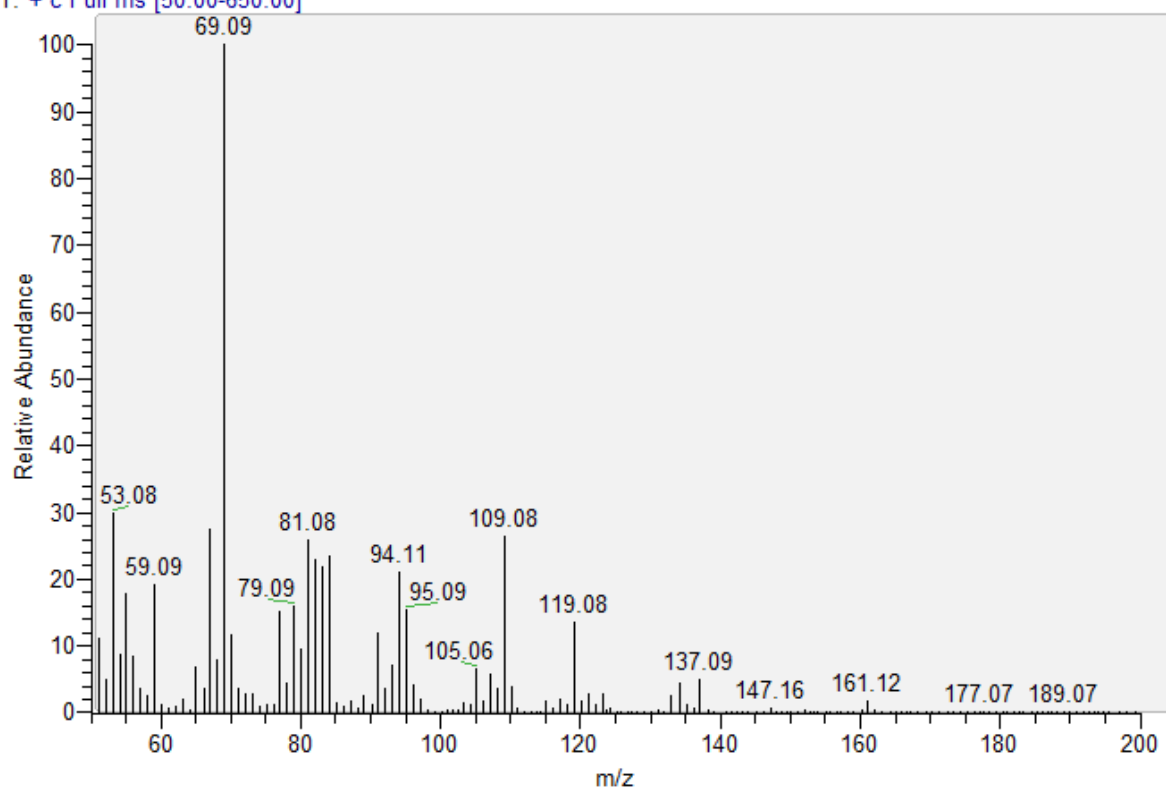

3058 #1220-1222 RT: 29.09-29.14 AV: 3 NL: 1.95E7

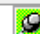

T: + c Full ms [50.00-650.00]

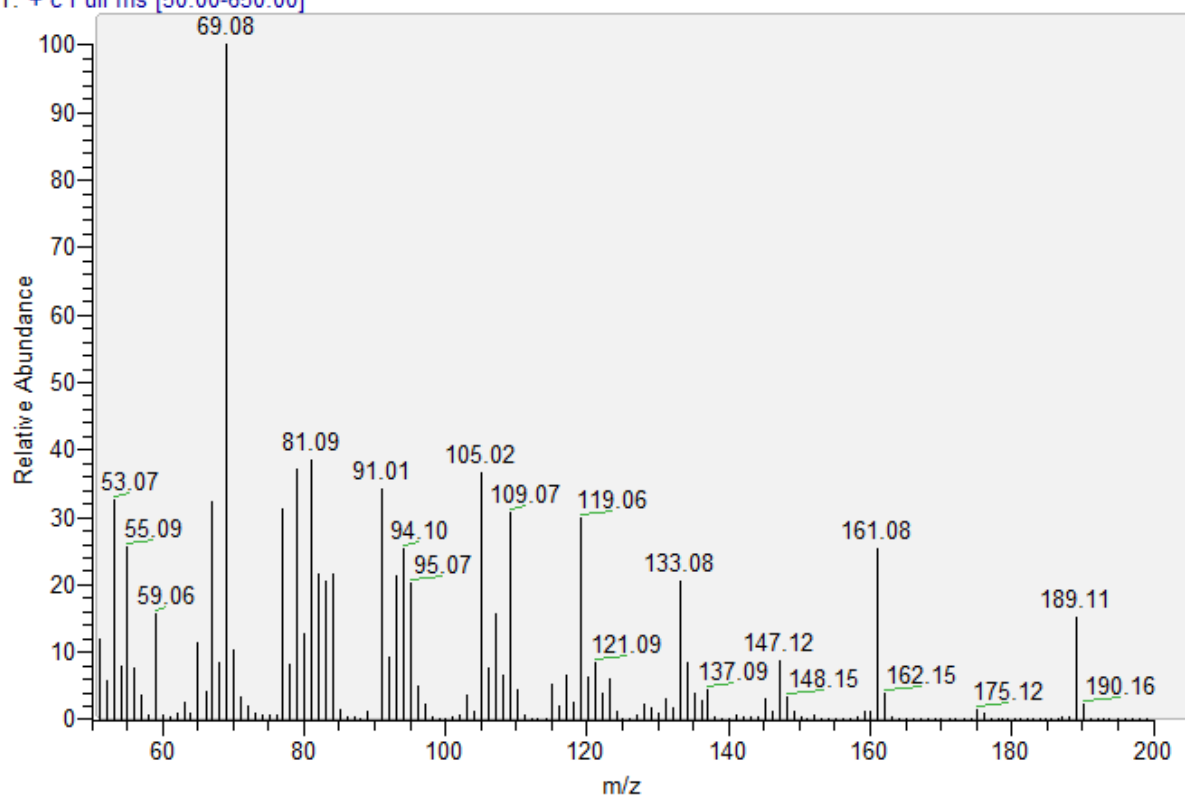

3057 #1226-1228 RT: 29.05-29.10 AV: 3 NL: 1.06E7  
T: + c Full ms [50.00-650.00]

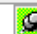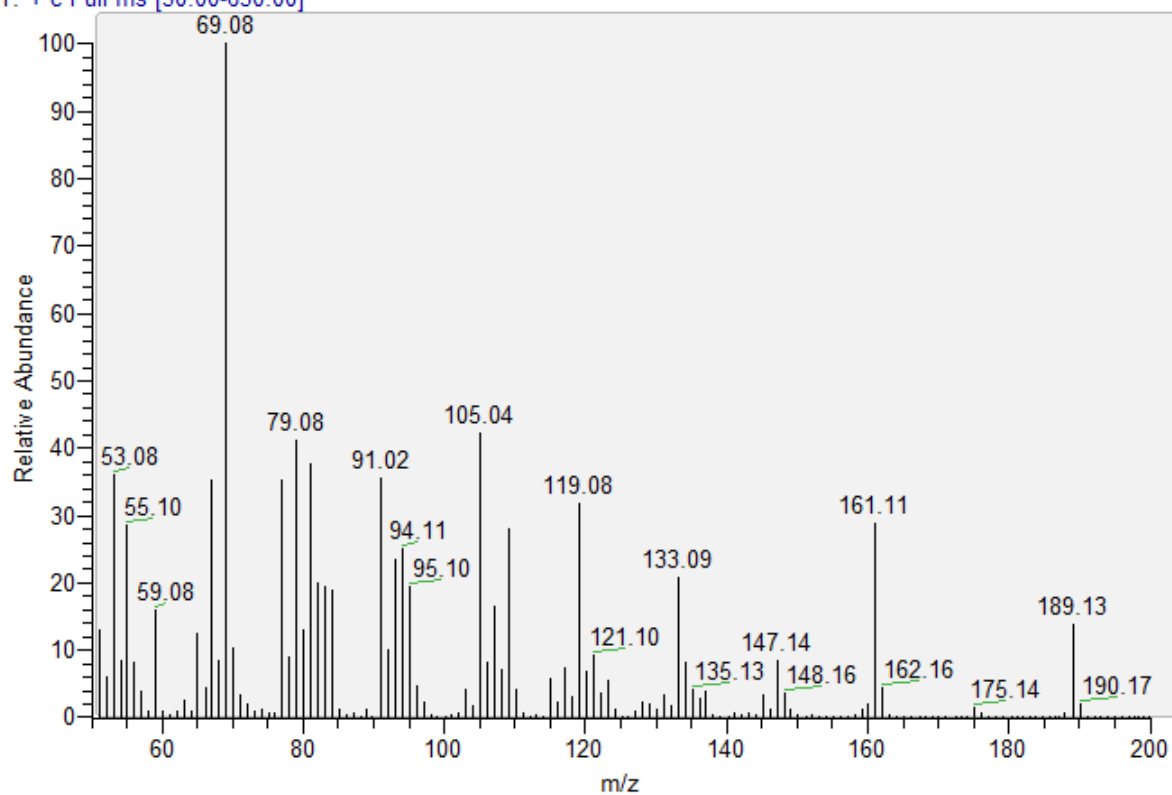

3021 #1222-1223 RT: 29.06-29.08 AV: 2 NL: 1.16E7  
T: + c Full ms [50.00-650.00]

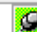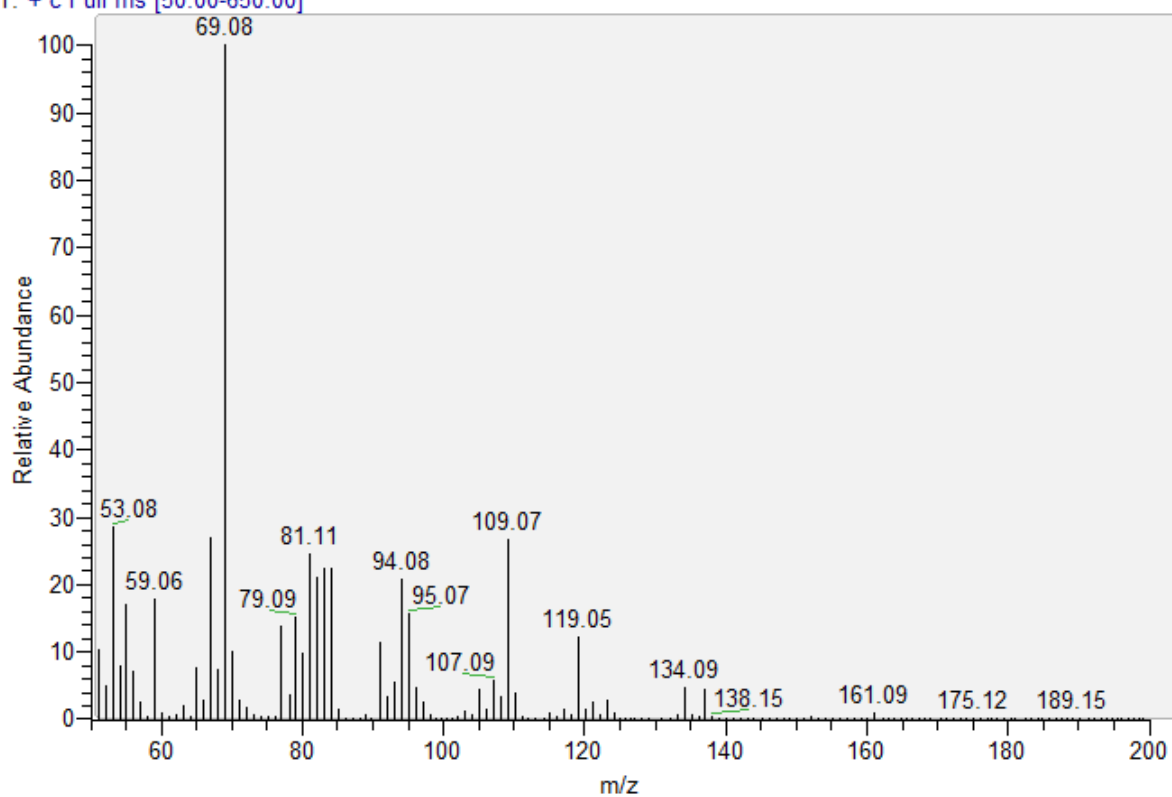

3075 #1221 RT: 29.07 AV: 1 NL: 1.11E7  
T: + c Full ms [50.00-650.00]

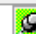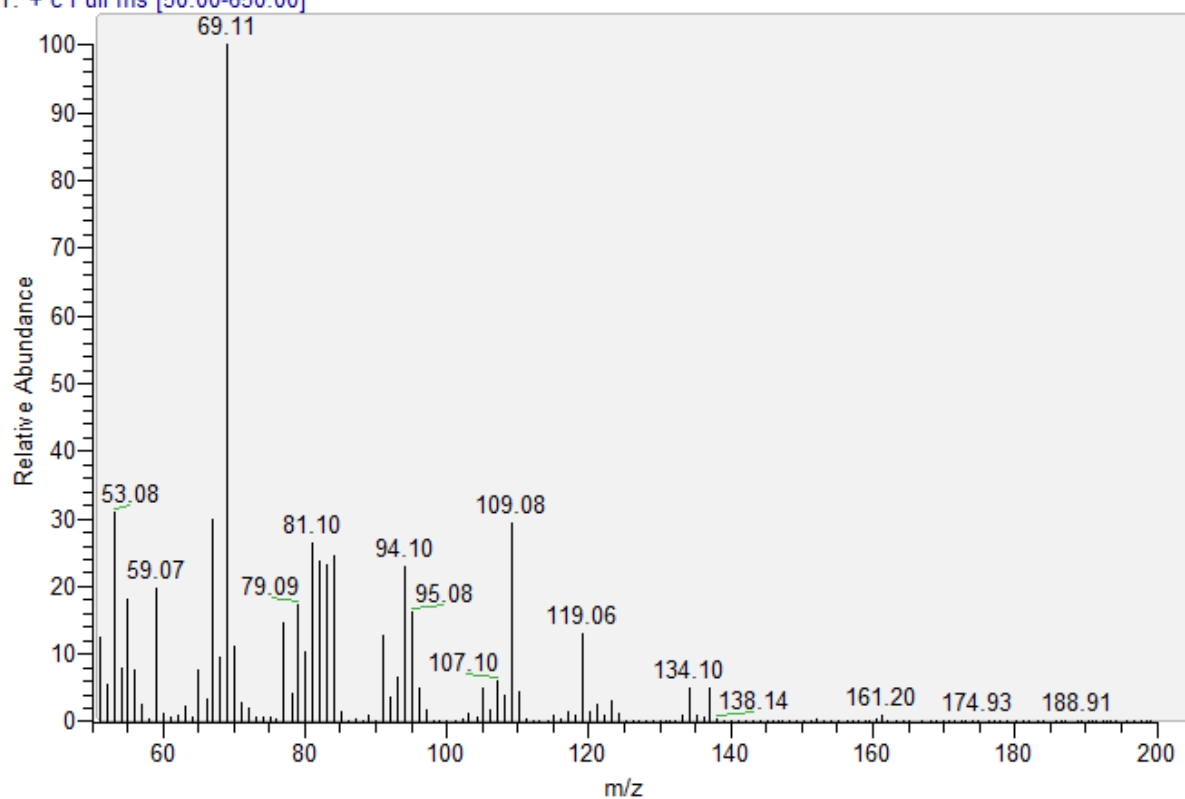



3074 #1223 RT: 29.07 AV: 1 NL: 1.28E7  
T: + c Full ms [50.00-650.00]

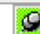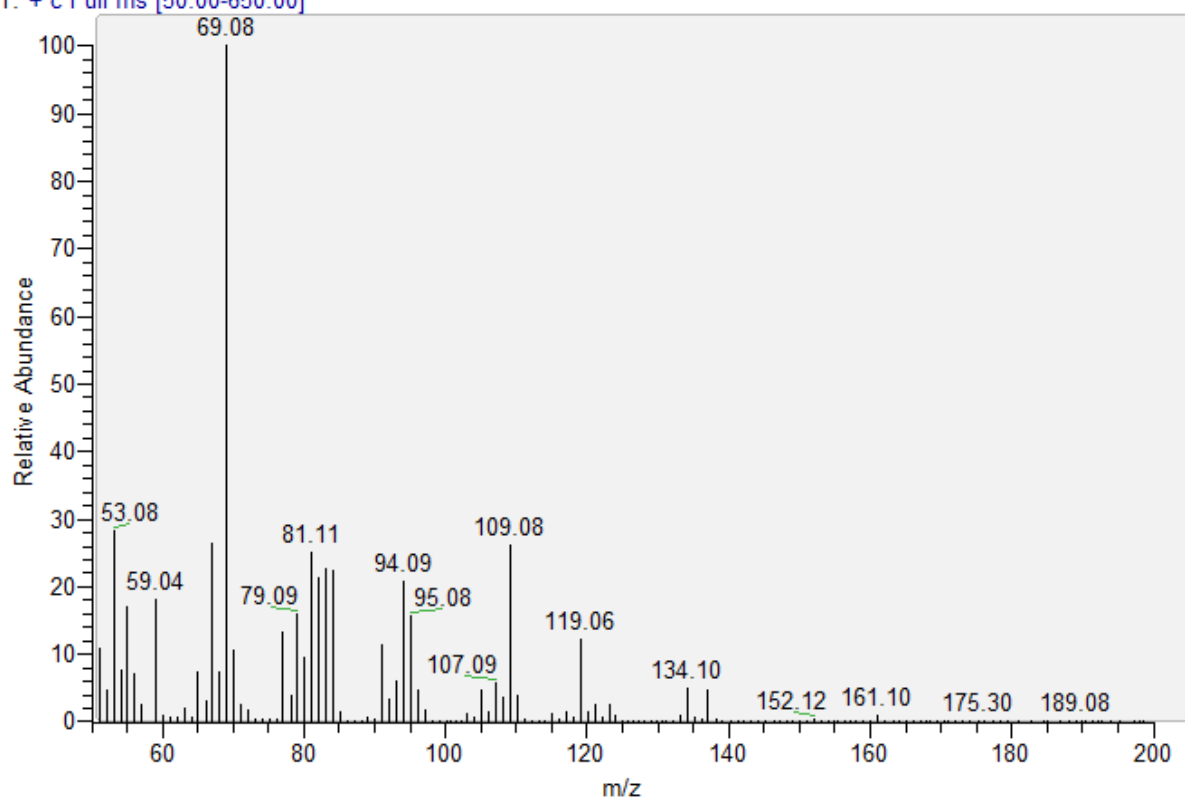

3073 #1221-1222 RT: 29.05-29.07 AV: 2 NL: 1.59E7  
T: + c Full ms [50.00-650.00]

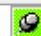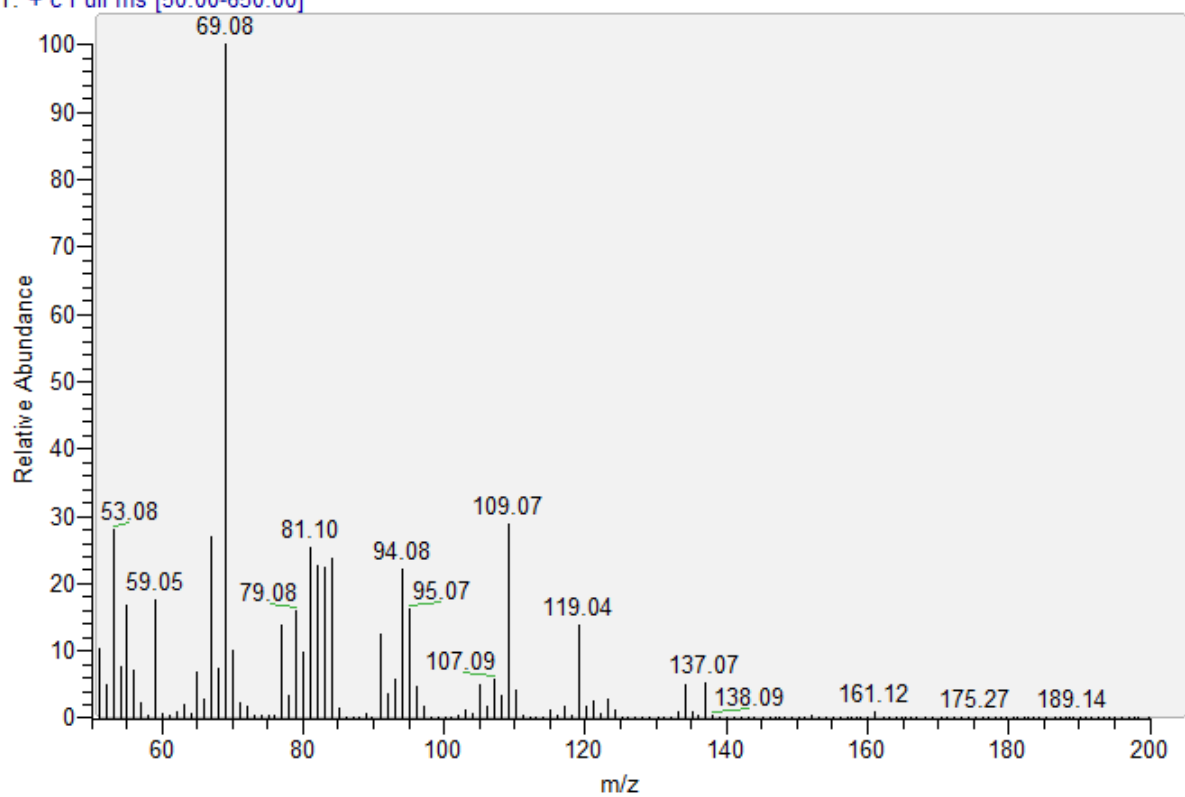

3073 #1221-1222 RT: 29.05-29.07 AV: 2 NL: 1.59E7  
T: + c Full ms [50.00-650.00]

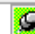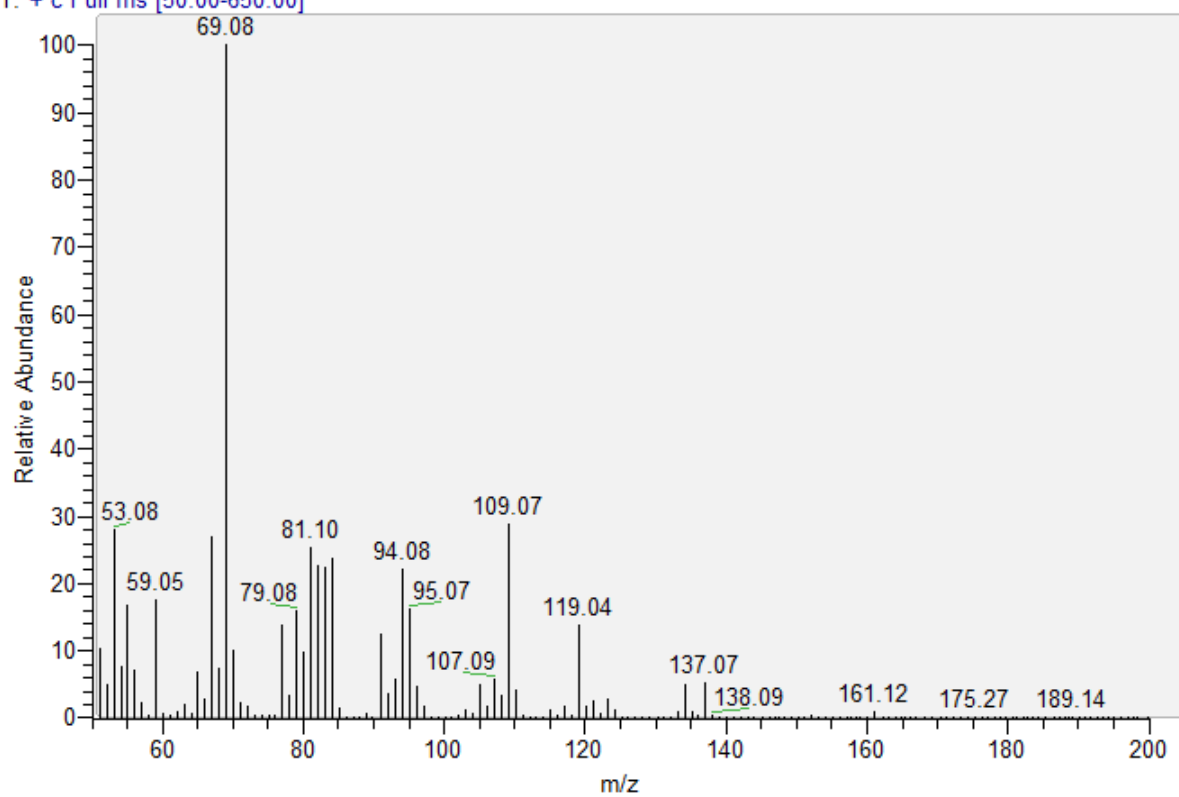

3072 #1220-1221 RT: 29.05-29.08 AV: 2 NL: 2.06E7  
T: + c Full ms [50.00-650.00]

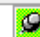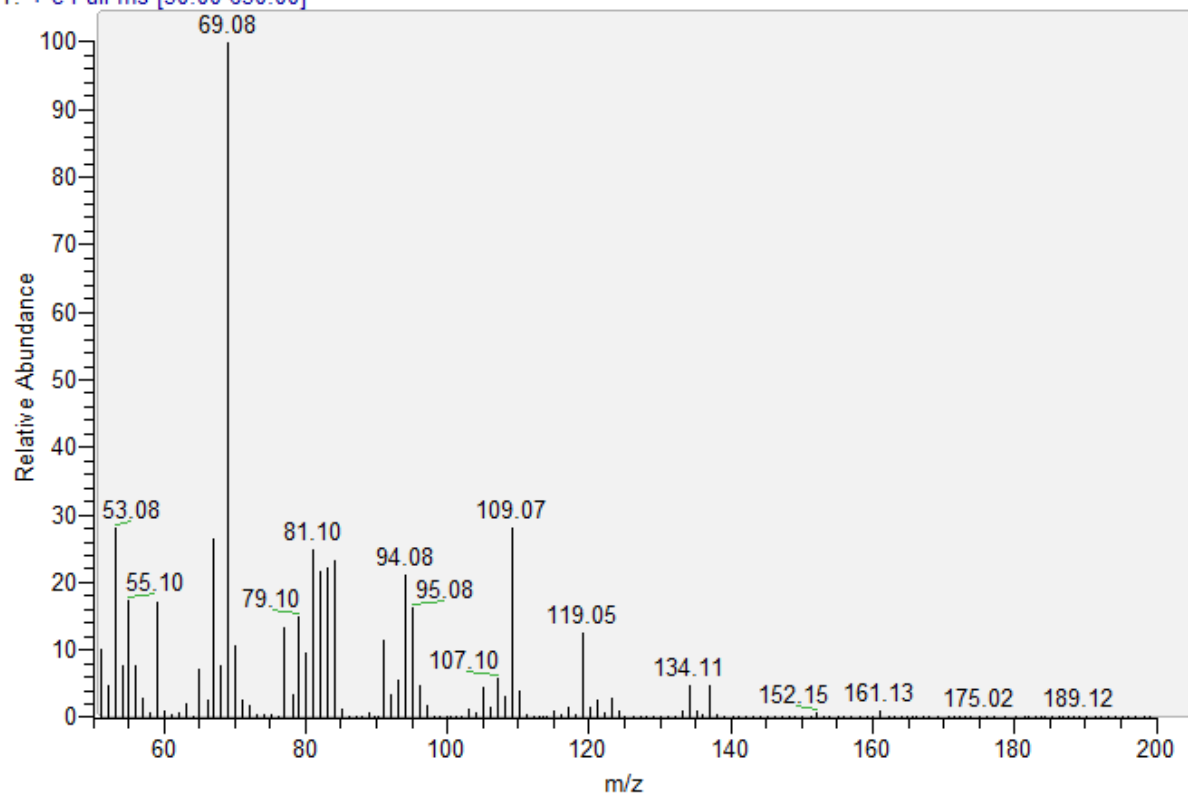

3070 #1222-1224 RT: 29.03-29.08 AV: 3 NL: 1.60E6  
T: + c Full ms [50.00-650.00]

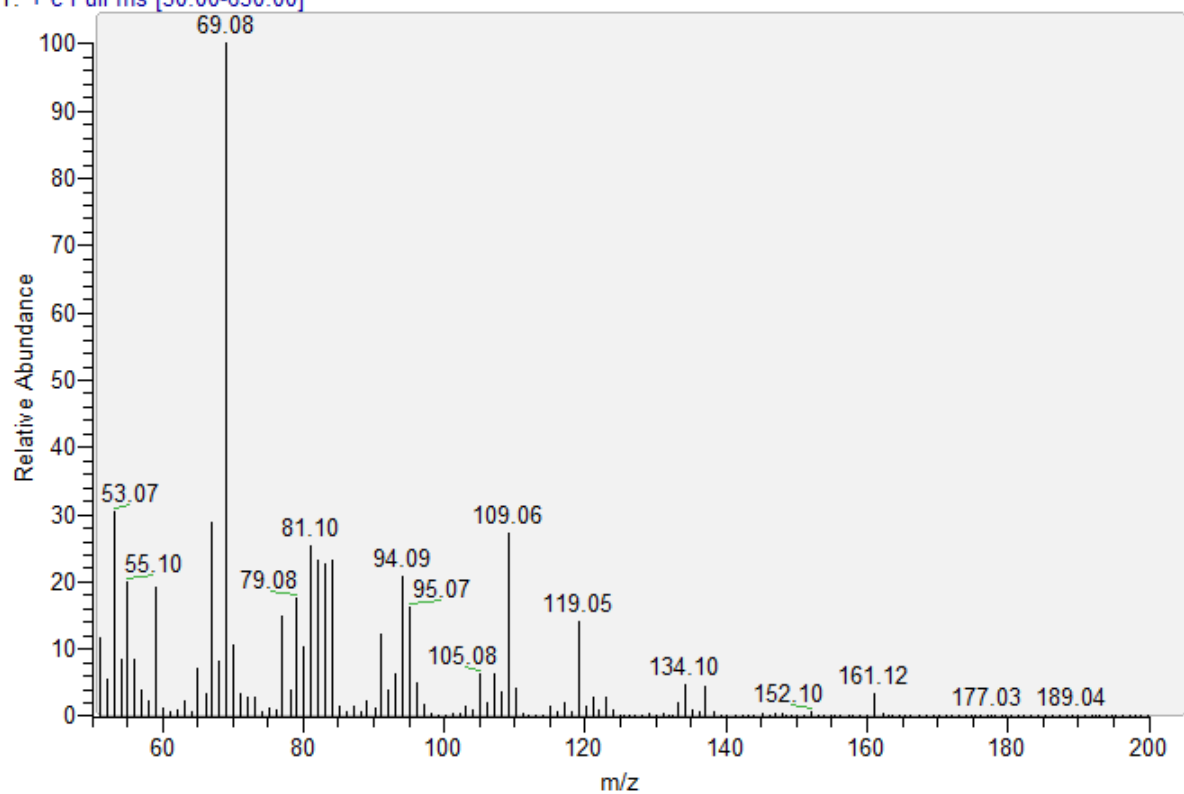

Neryl Acetat

Reference

1\_20 #1280-1281 RT: 30.31-30.33 AV: 2 NL: 5.02E6

T: + c Full ms [50.00-650.00]

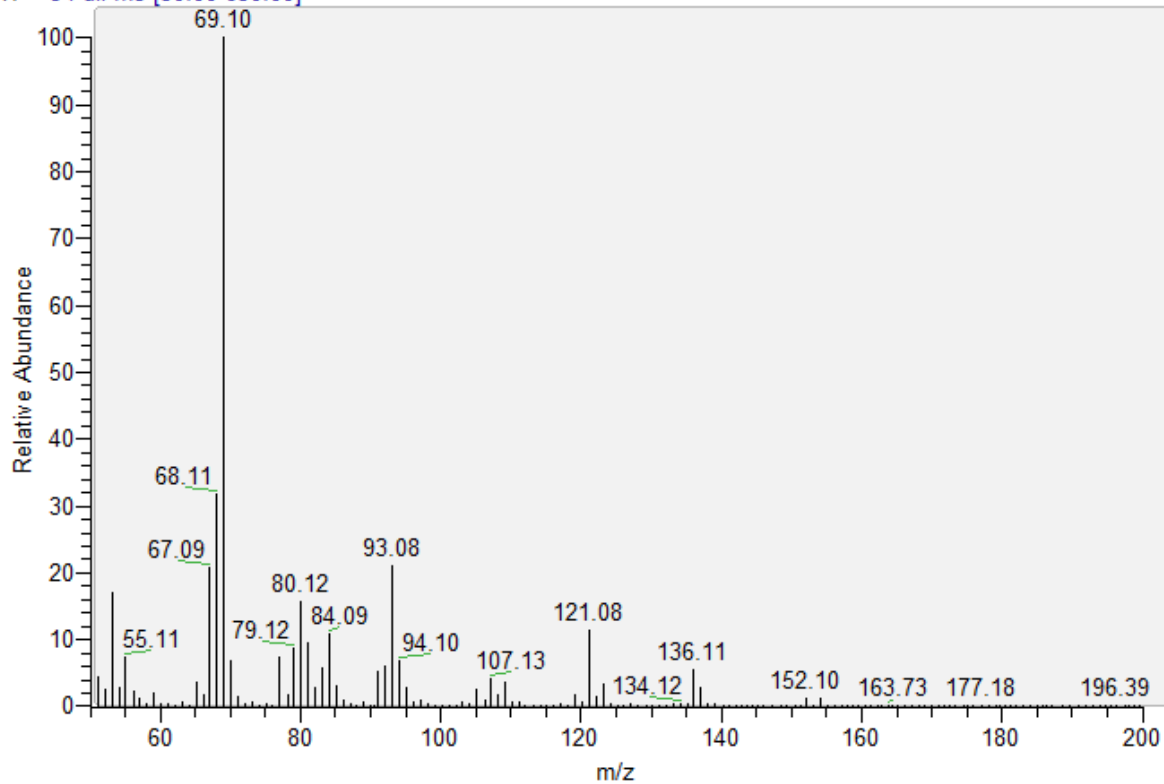

Samples

3053 #1274-1275 RT: 30.30-30.33 AV: 2 NL: 4.59E6

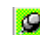

T: + c Full ms [50.00-650.00]

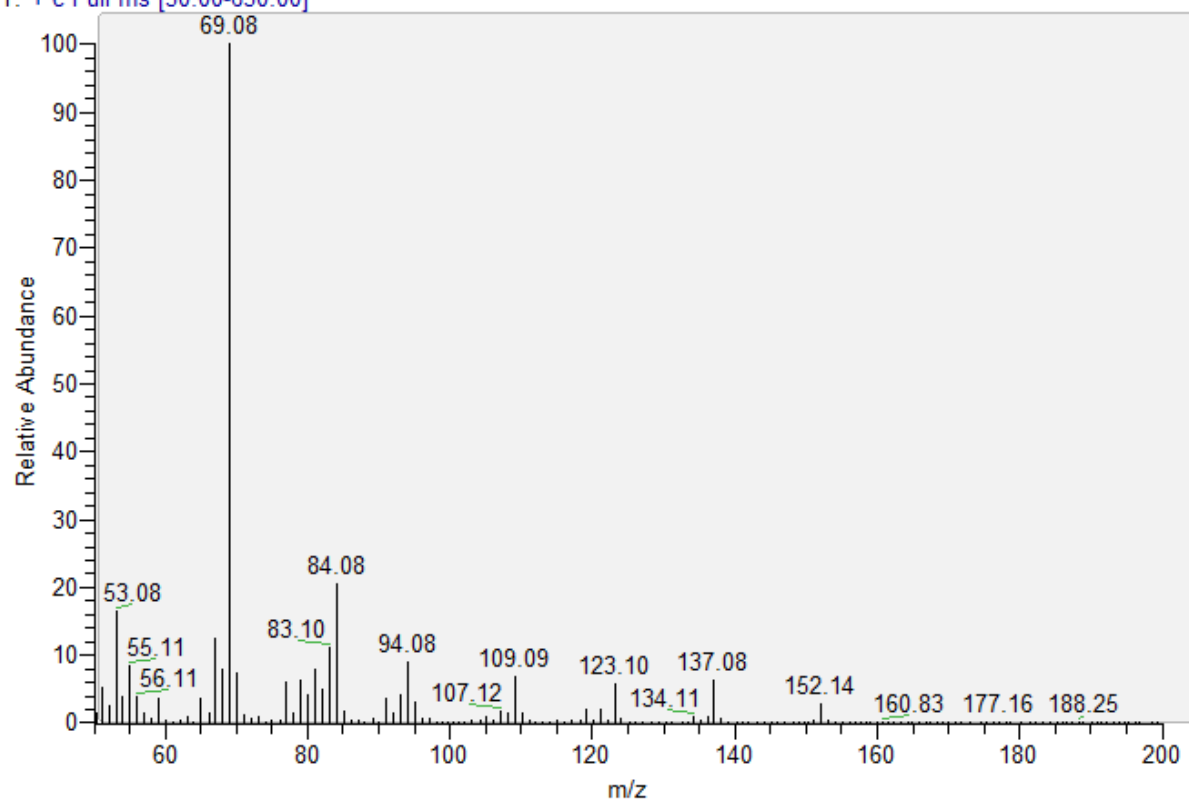



3018 #1279-1280 RT: 30.32-30.35 AV: 2 NL: 7.85E7  
T: + c Full ms [50.00-650.00]

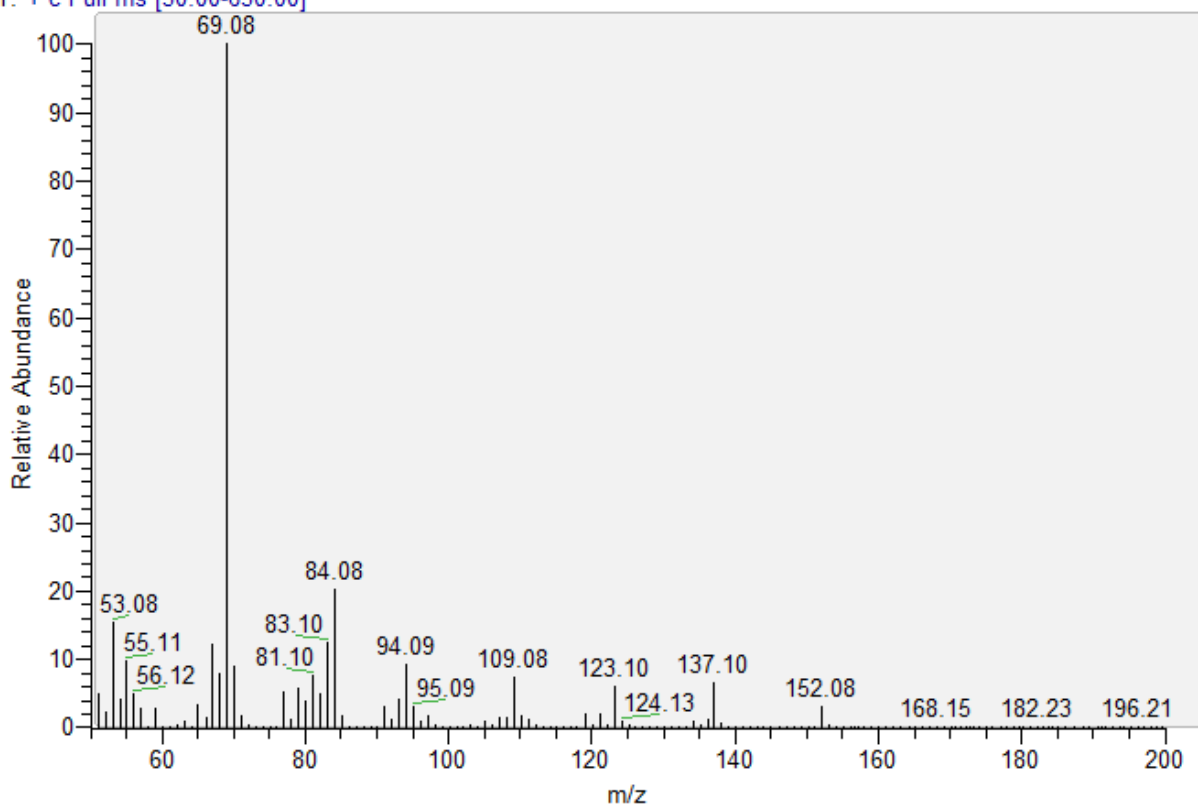

3058 #1273-1274 RT: 30.36-30.38 AV: 2 NL: 8.97E7  
T: + c Full ms [50.00-650.00]

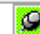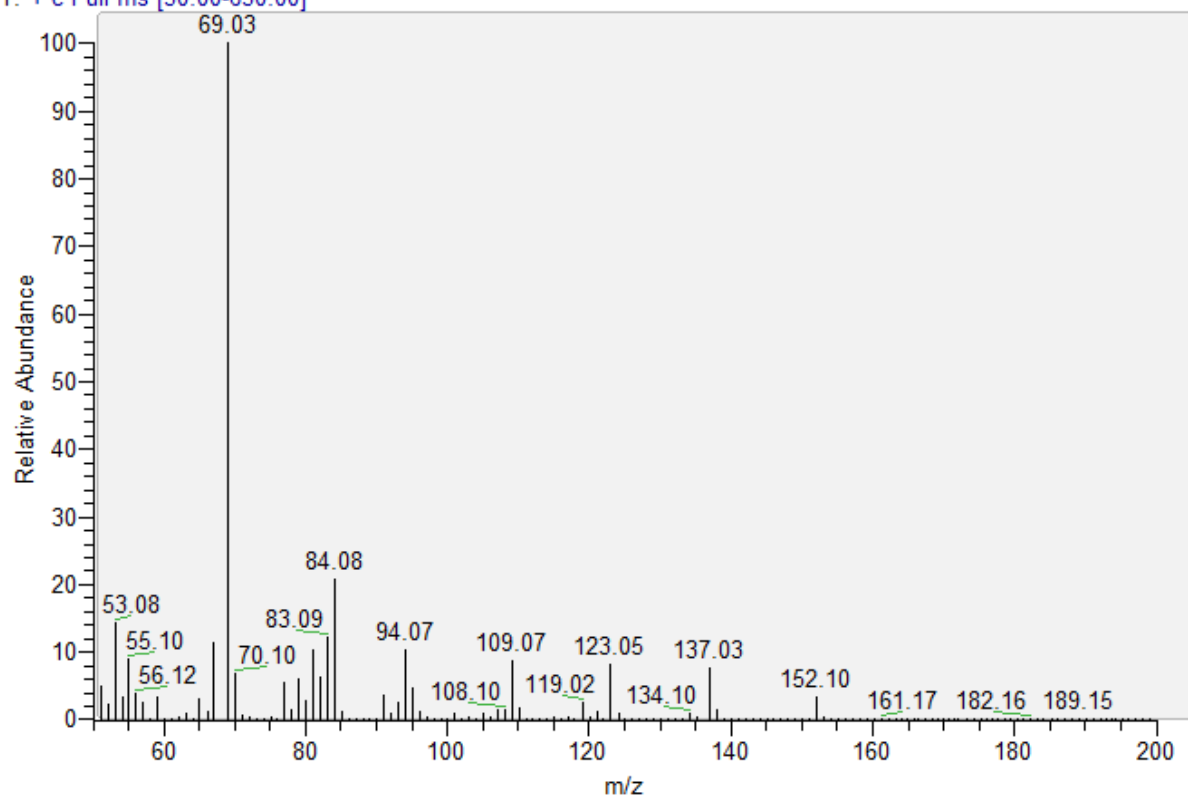

3057 #1279-1281 RT: 30.32-30.36 AV: 3 NL: 3.68E7  
T: + c Full ms [50.00-650.00]

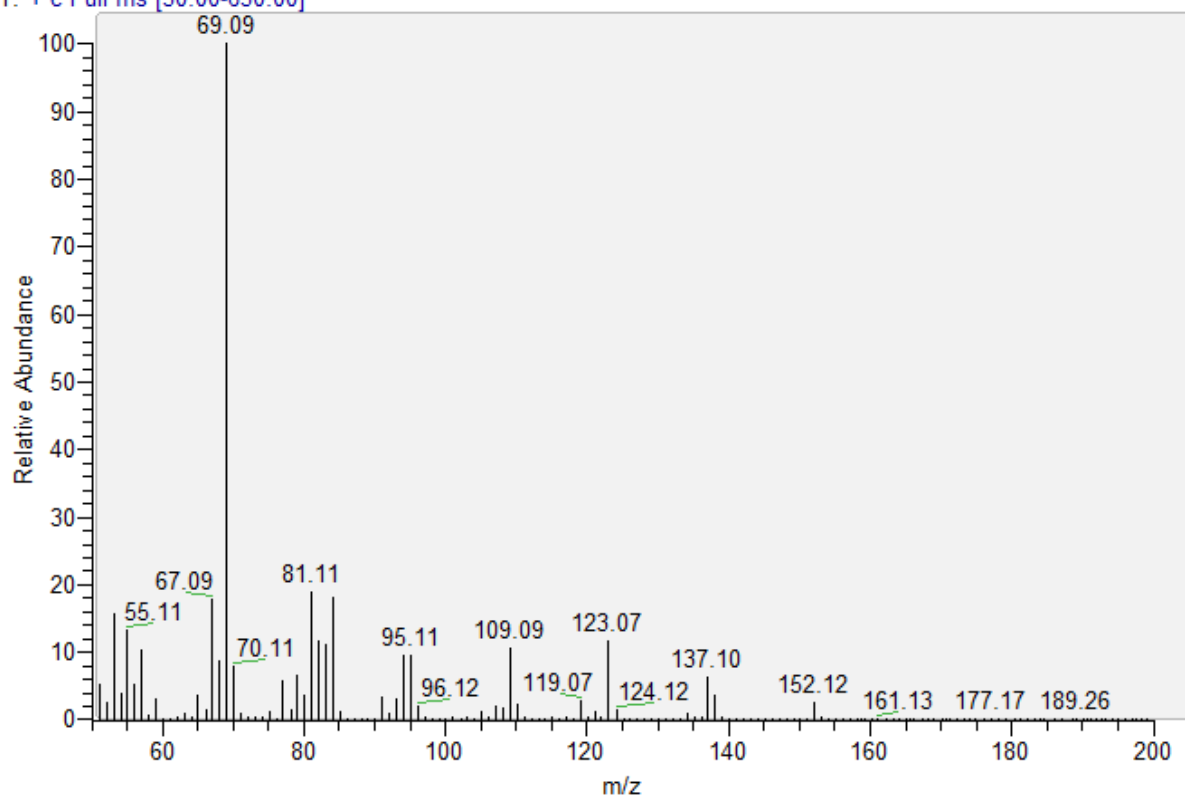

3021 #1276-1277 RT: 30.34-30.37 AV: 2 NL: 6.39E7  
T: + c Full ms [50.00-650.00]

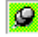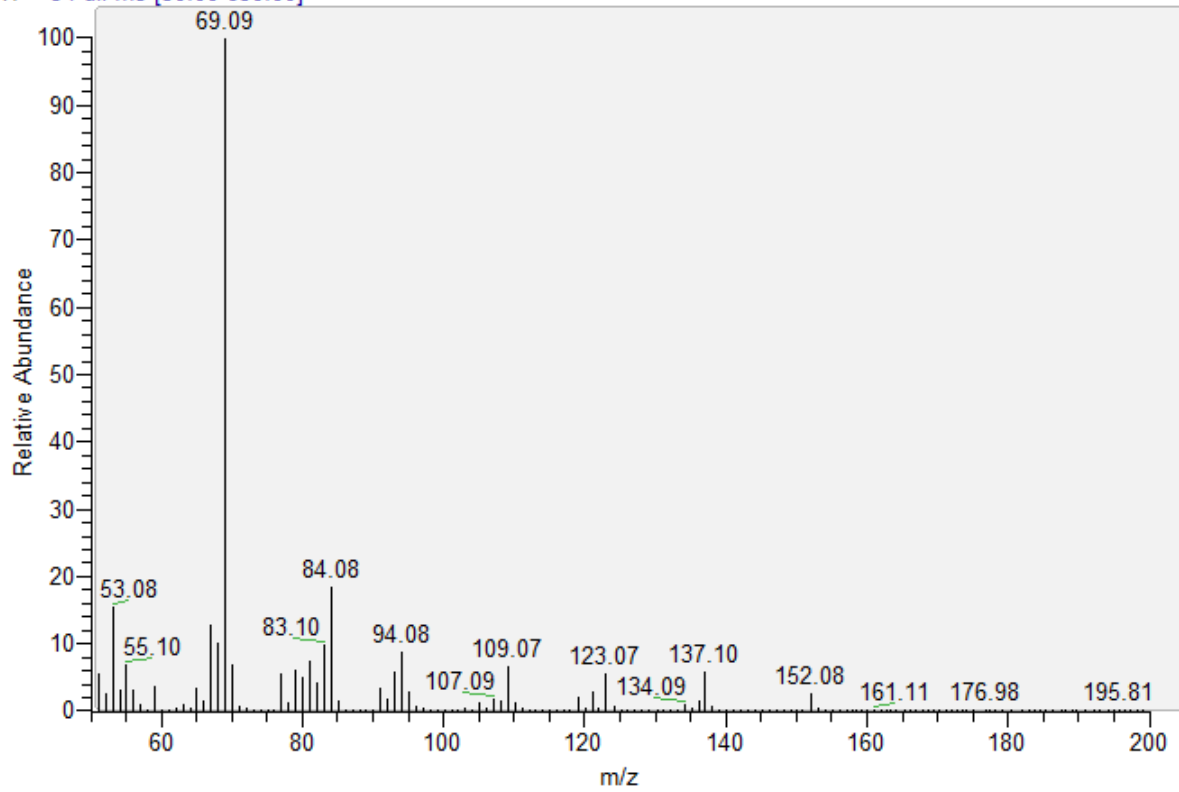

3075 #1274-1275 RT: 30.33-30.35 AV: 2 NL: 4.04E7  
T: + c Full ms [50.00-650.00]

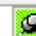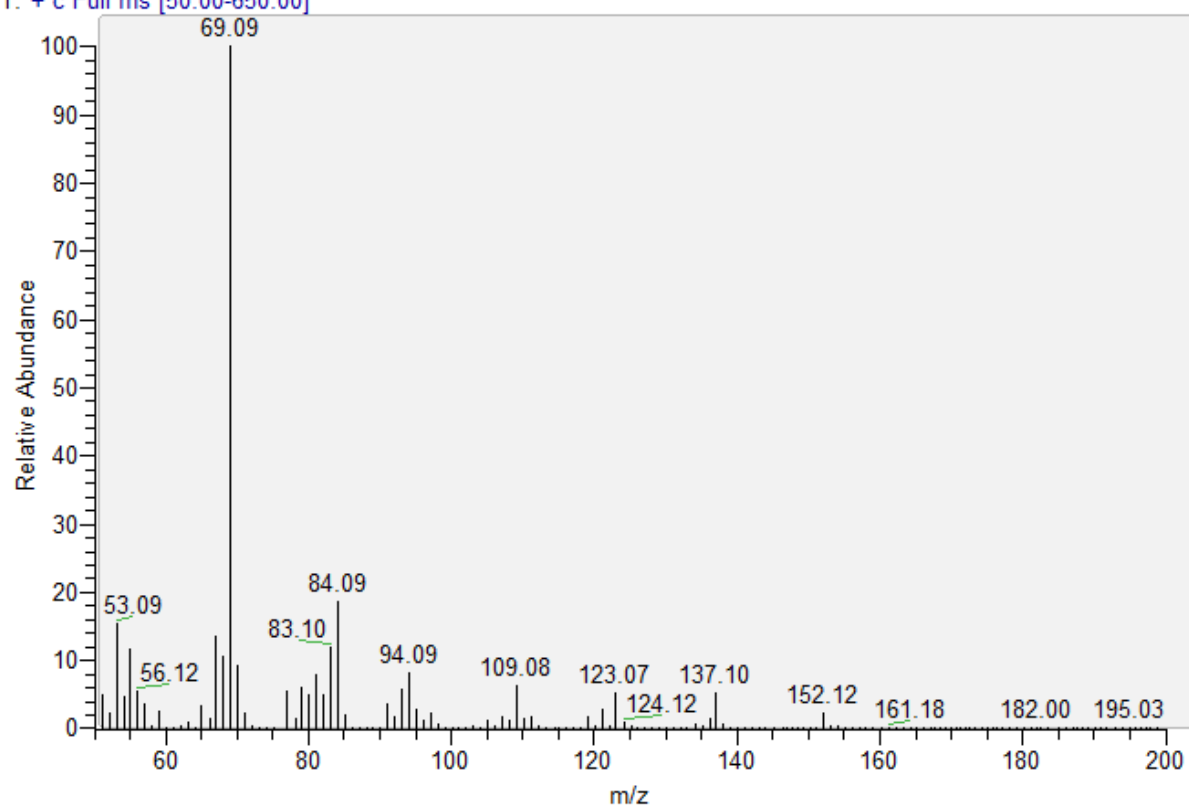

3074 #1276-1277 RT: 30.33-30.36 AV: 2 NL: 4.07E7

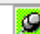

T: + c Full ms [50.00-650.00]

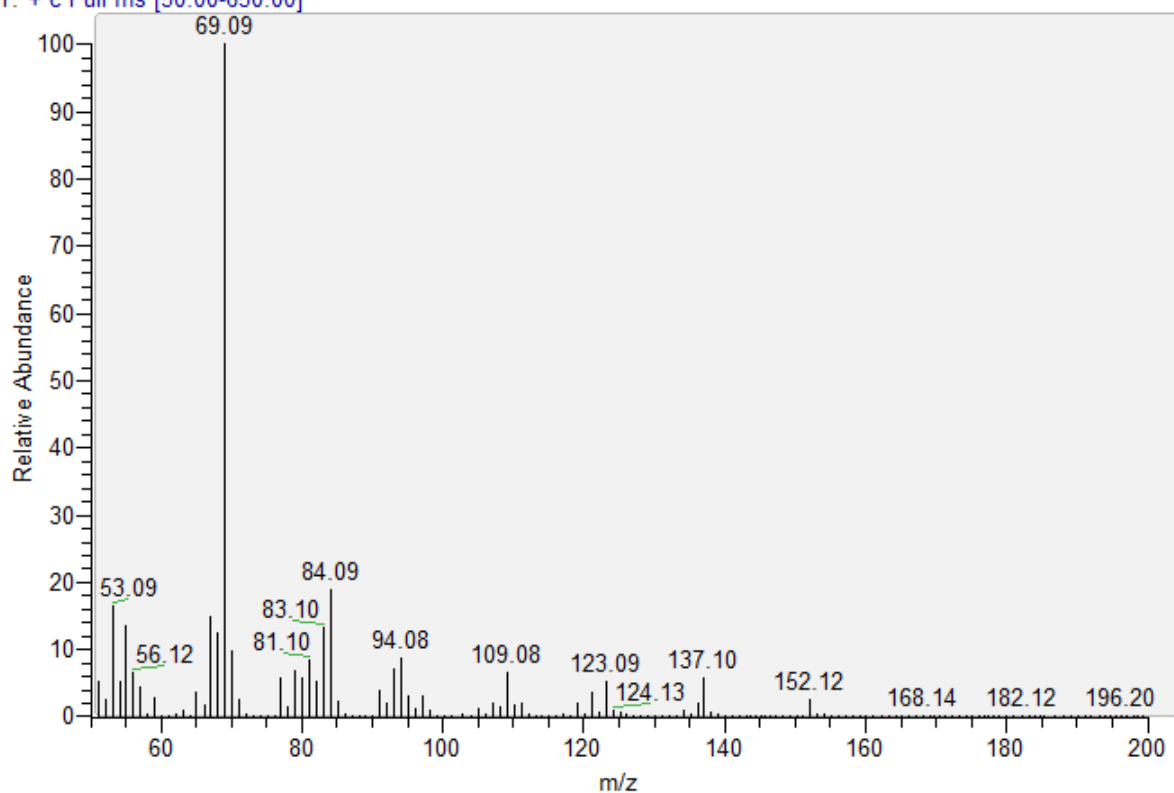

3073 #1274-1276 RT: 30.32-30.36 AV: 3 NL: 4.24E7  
T: + c Full ms [50.00-650.00]

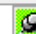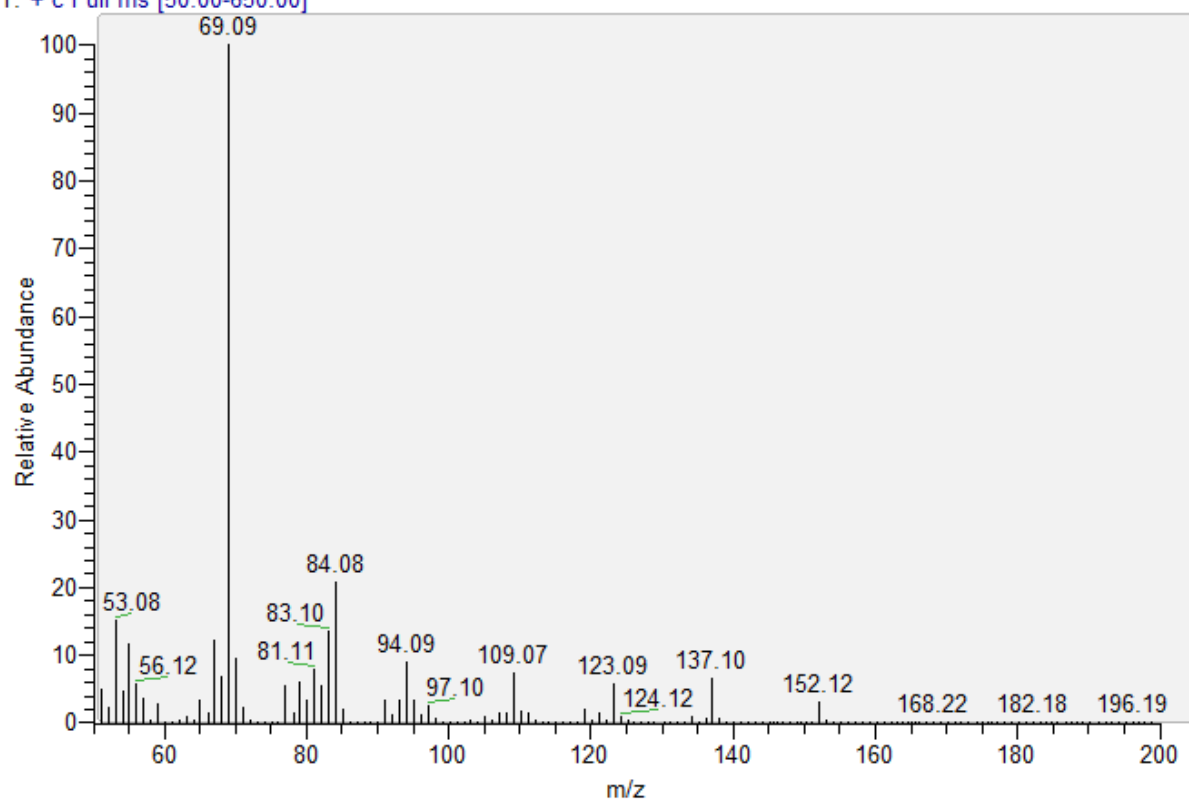

3073 #1275 RT: 30.34 AV: 1 NL: 6.60E7

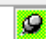

T: + c Full ms [50.00-650.00]

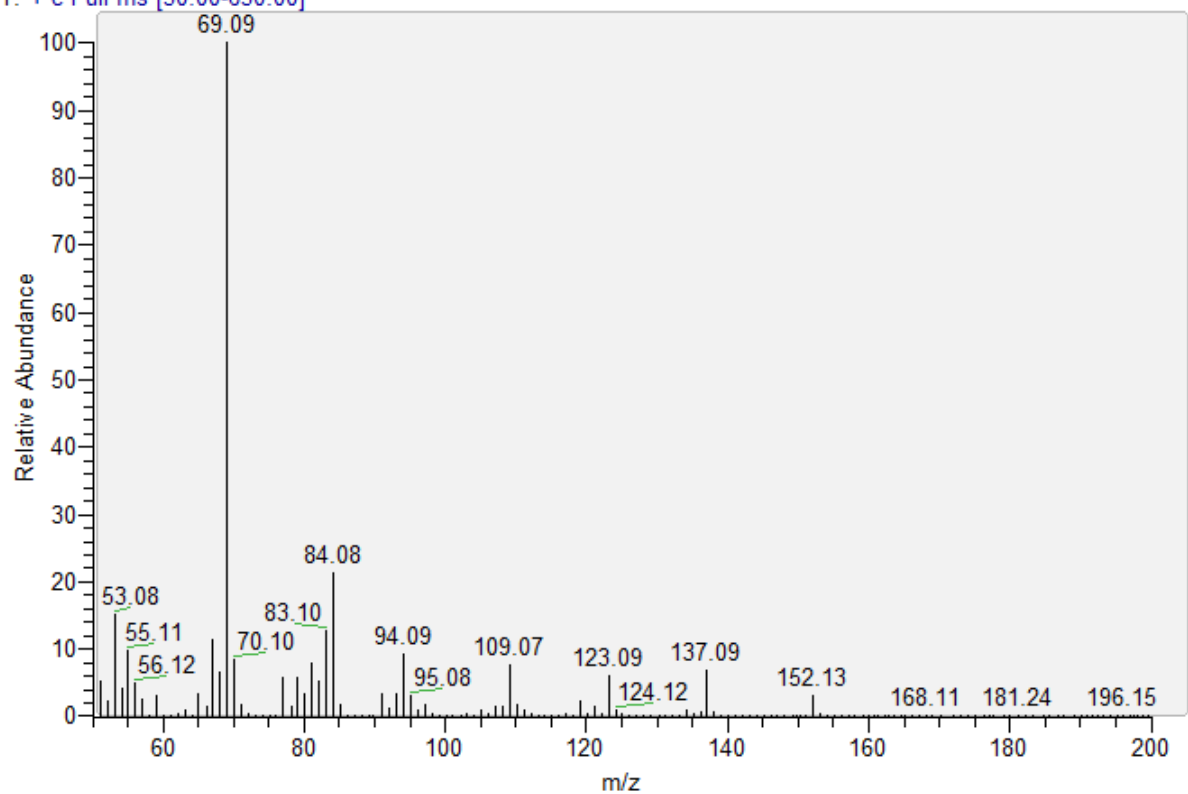



3072 #1273-1275 RT: 30.32-30.36 AV: 3 NL: 5.52E7  
T: + c Full ms [50.00-650.00]

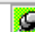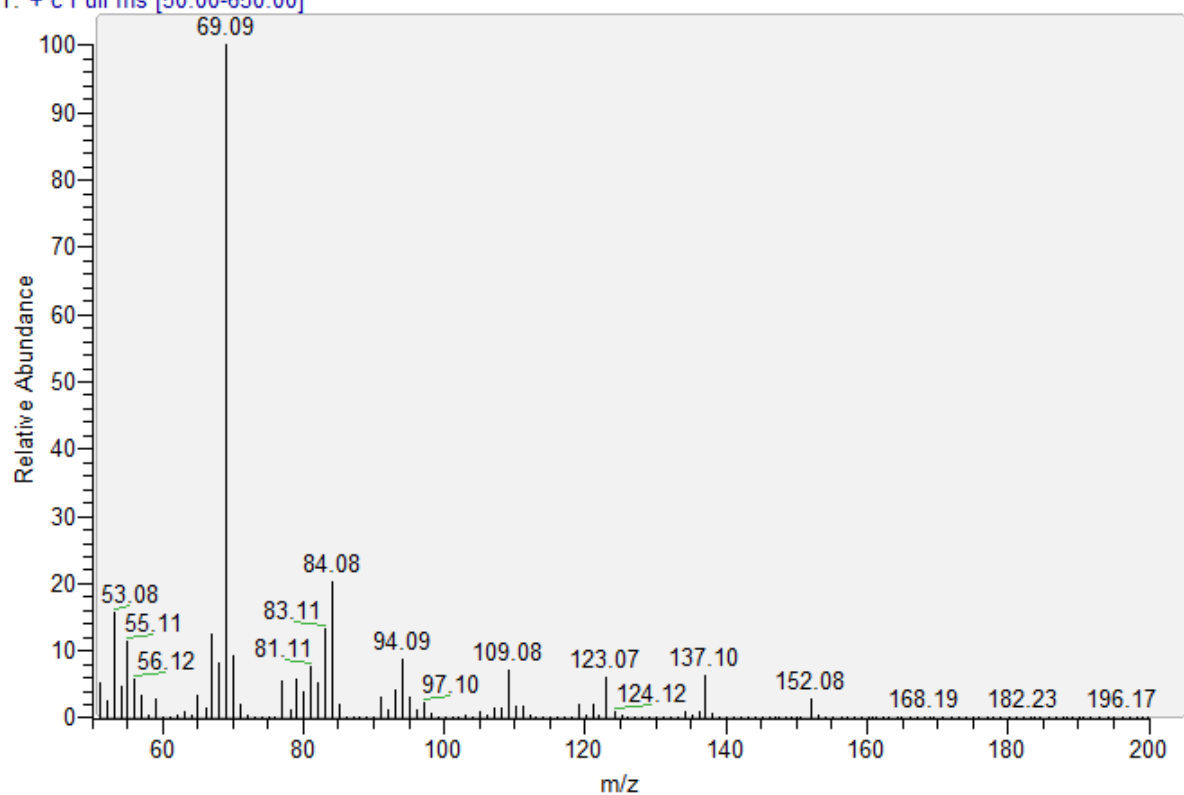

3070 #1275-1276 RT: 30.30-30.32 AV: 2 NL: 5.80E6  
T: + c Full ms [50.00-650.00]

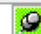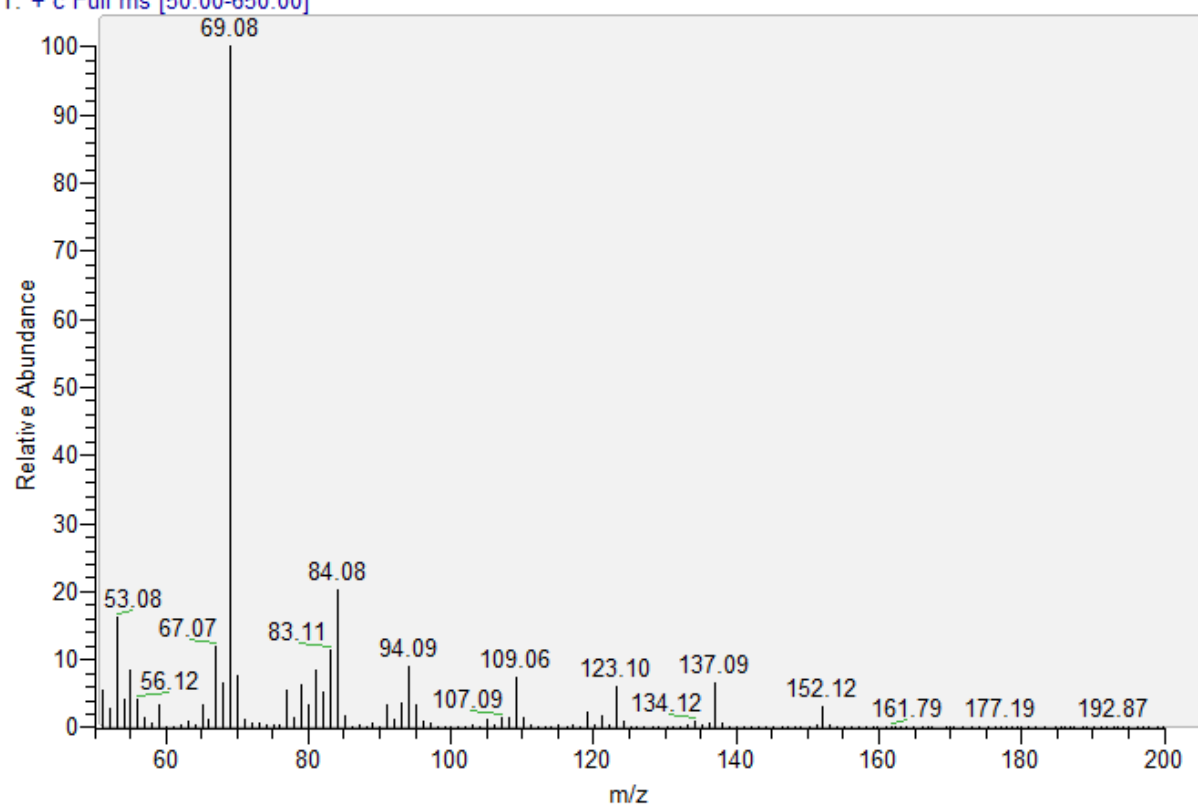

Geranyl acetat

Reference

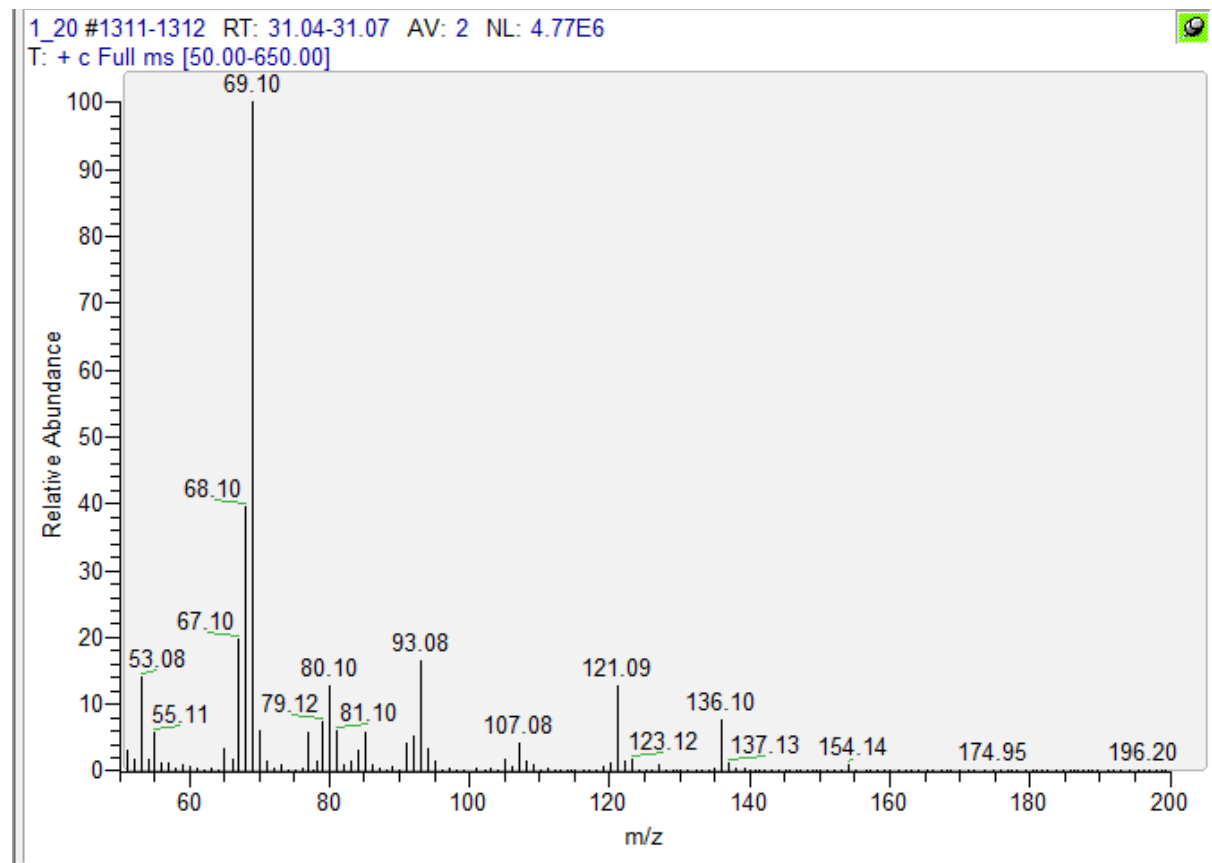

Samples:

3018 #1311-1312 RT: 31.09-31.11 AV: 2 NL: 9.01E7

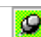

T: + c Full ms [50.00-650.00]

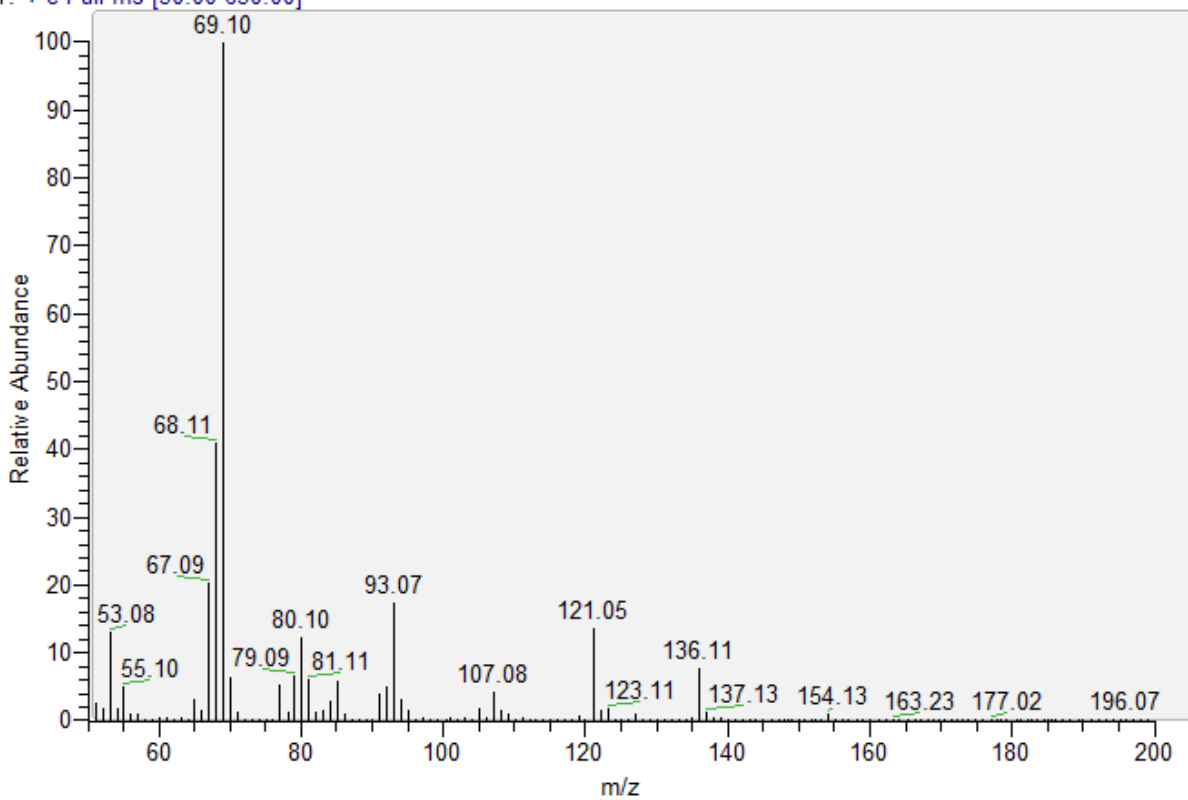

3053 #1305-1306 RT: 31.04-31.07 AV: 2 NL: 7.75E6

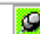

T: + c Full ms [50.00-650.00]

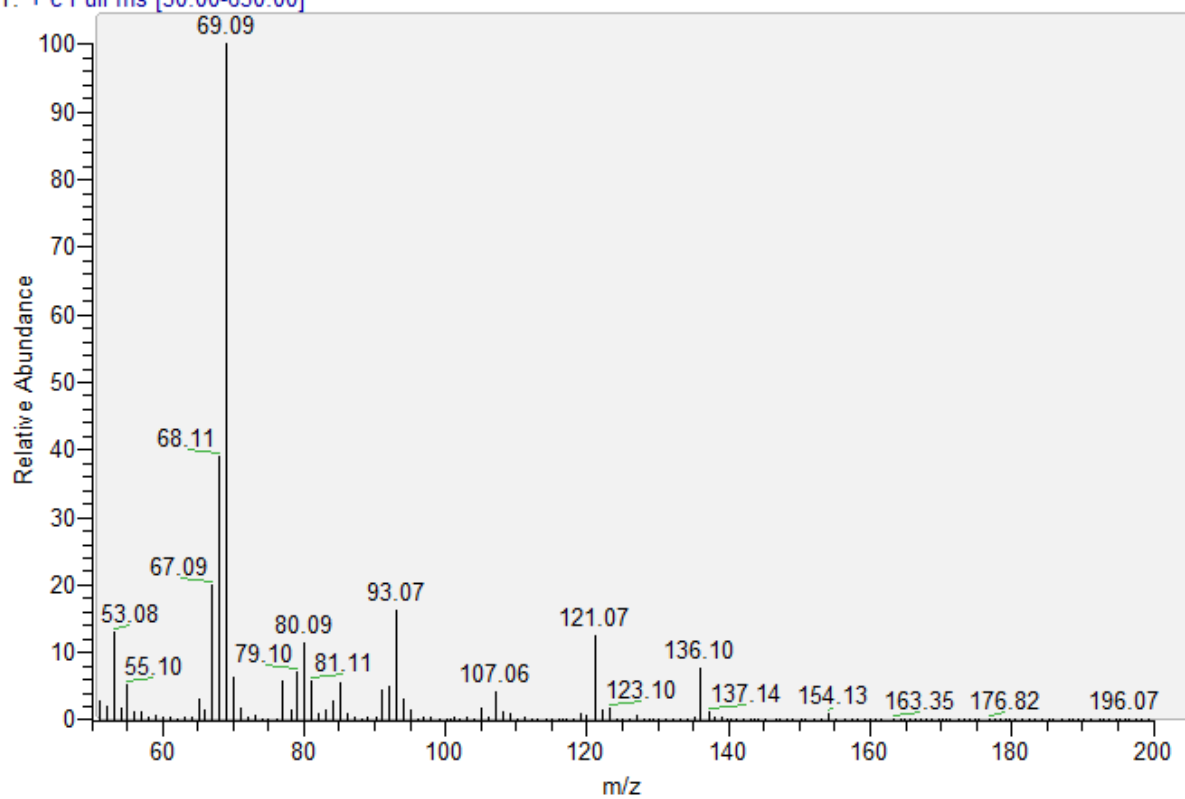

3058 #1303-1305 RT: 31.07-31.12 AV: 3 NL: 2.68E7

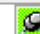

T: + c Full ms [50.00-650.00]

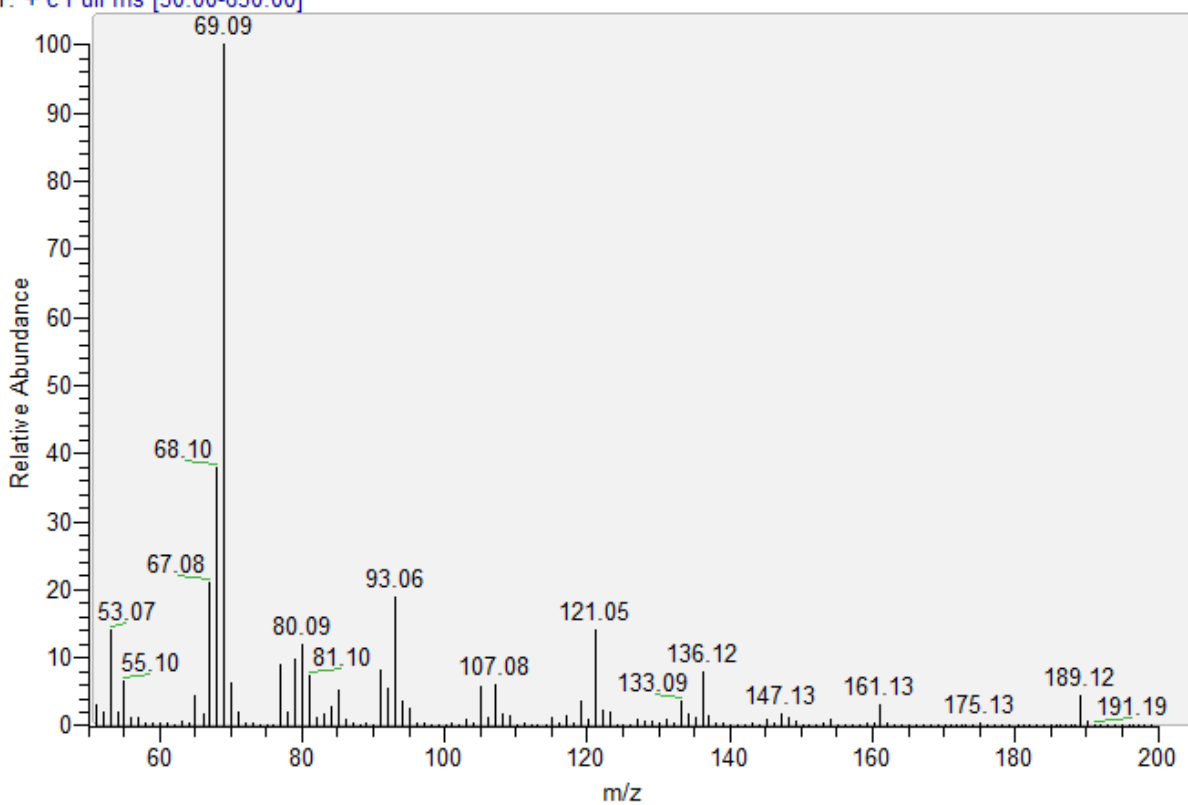

3057 #1310-1311 RT: 31.05-31.08 AV: 2 NL: 1.79E7  
T: + c Full ms [50.00-650.00]

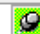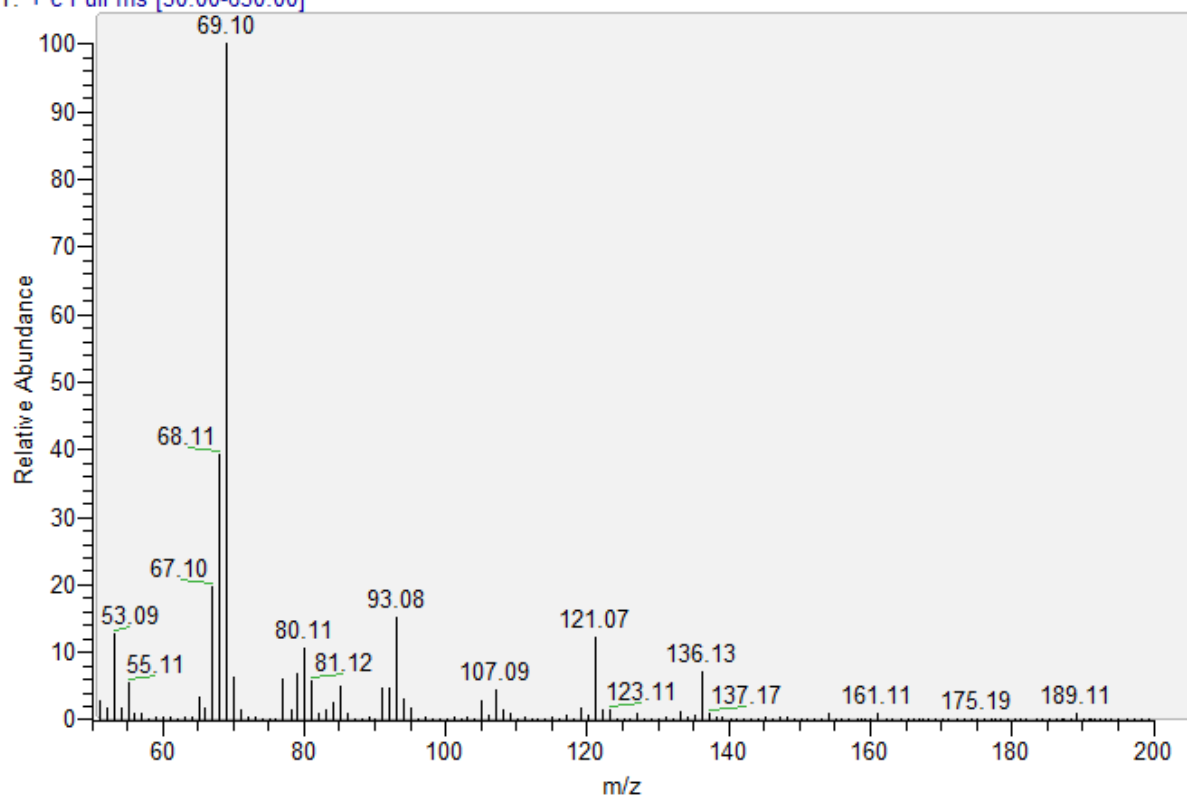

3021 #1307-1309 RT: 31.08-31.13 AV: 3 NL: 7.44E7  
T: + c Full ms [50.00-650.00]

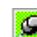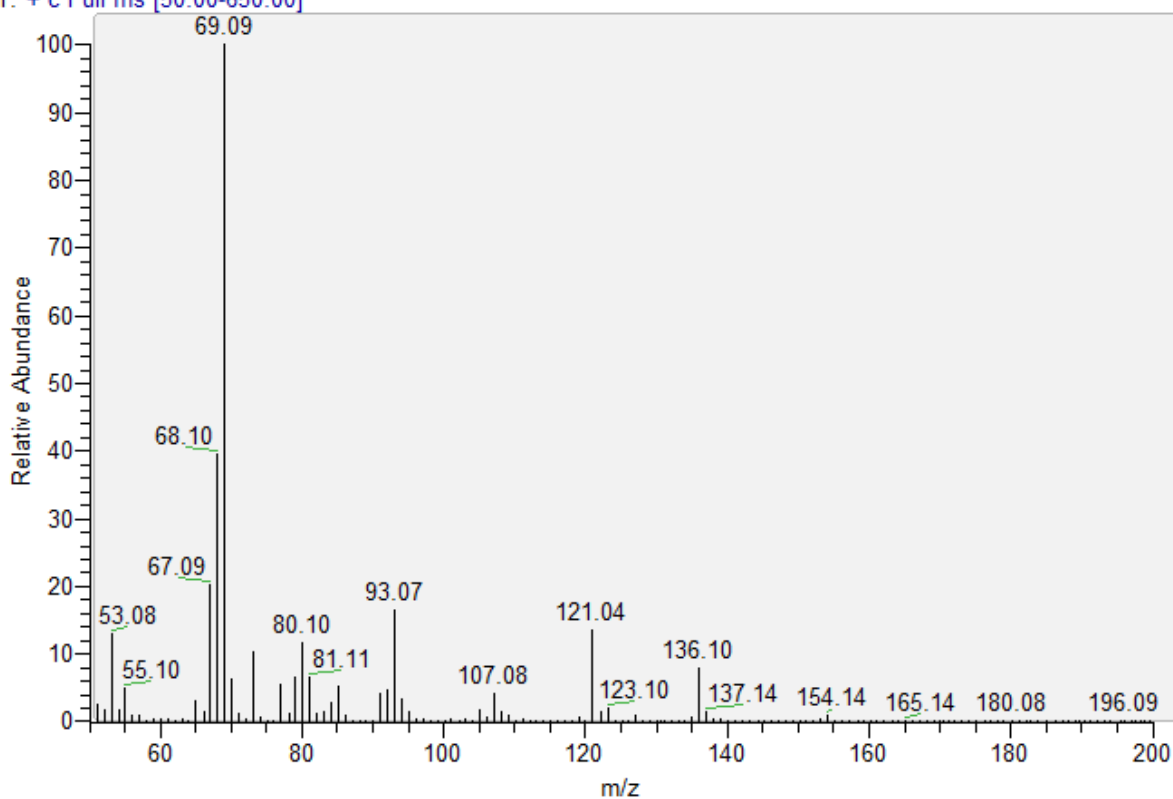



3075 #1306-1307 RT: 31.09-31.12 AV: 2 NL: 7.96E7

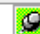

T: + c Full ms [50.00-650.00]

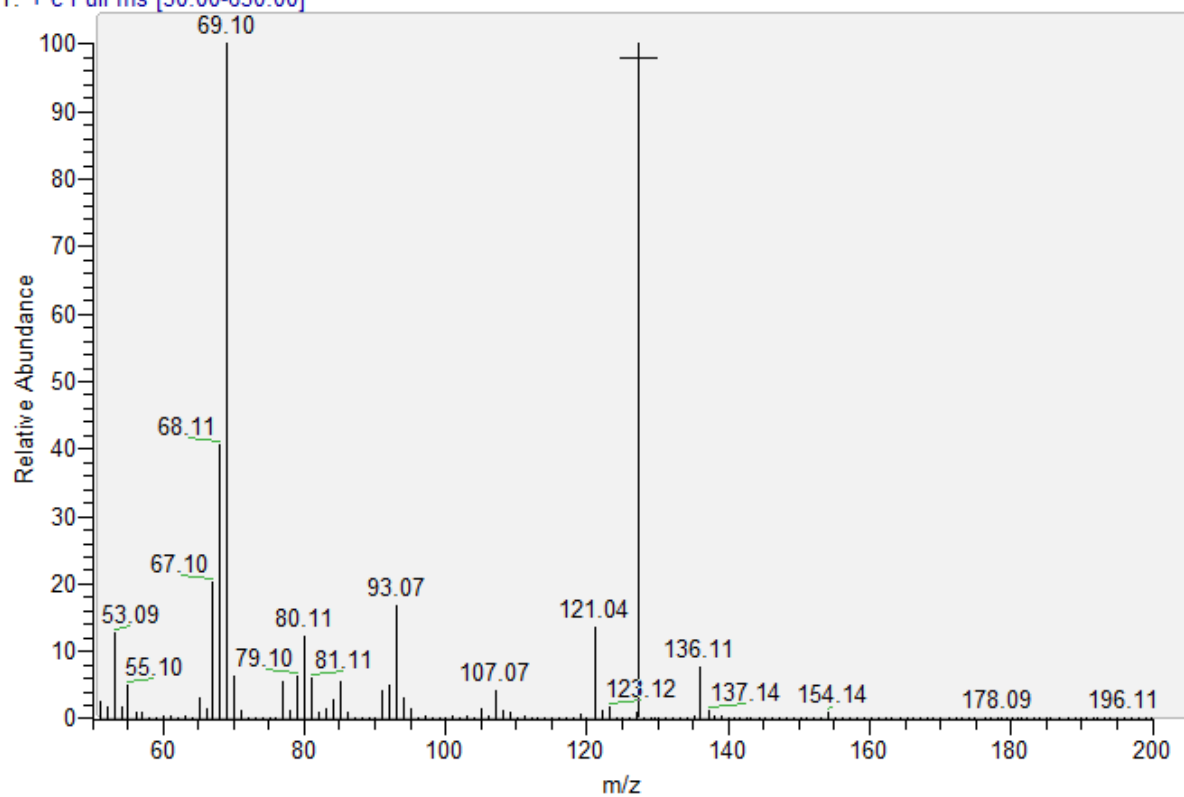

3074 #1307-1308 RT: 31.07-31.10 AV: 2 NL: 9.26E7

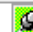

T: + c Full ms [50.00-650.00]

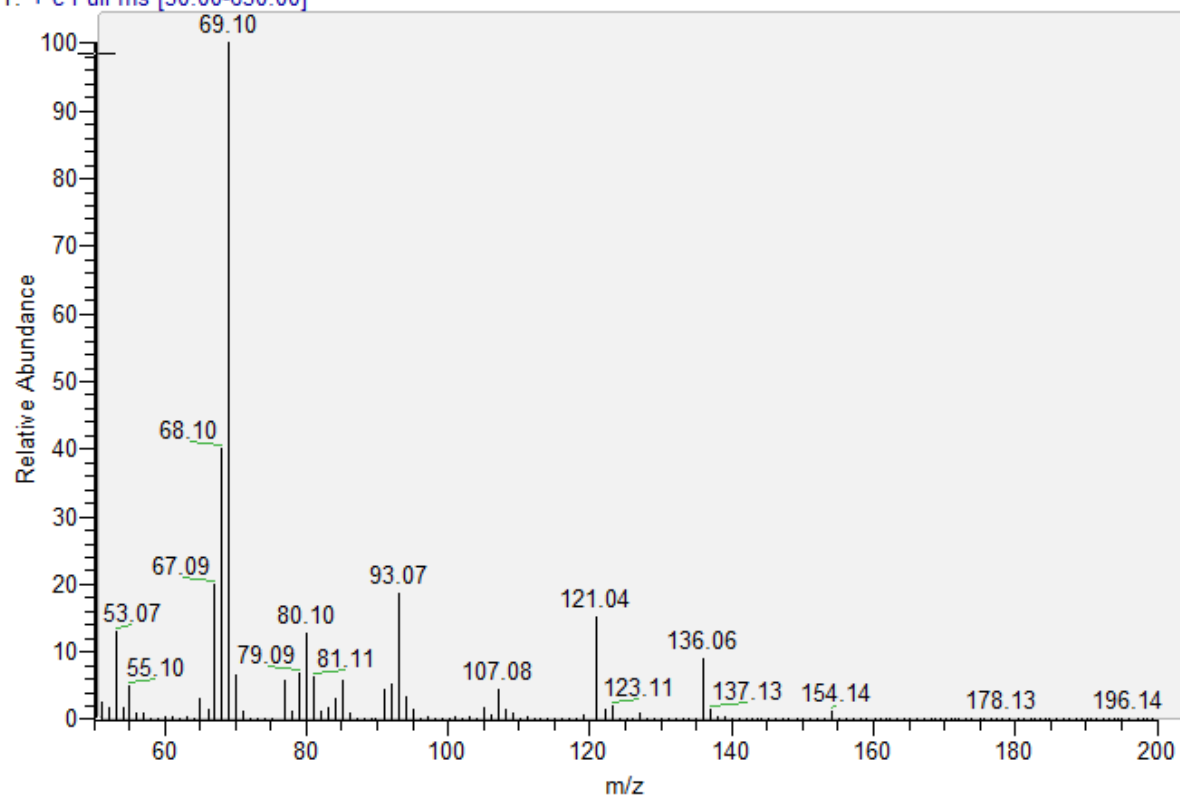

3073 #1305-1306 RT: 31.06-31.08 AV: 2 NL: 3.40E7  
T: + c Full ms [50.00-650.00]

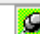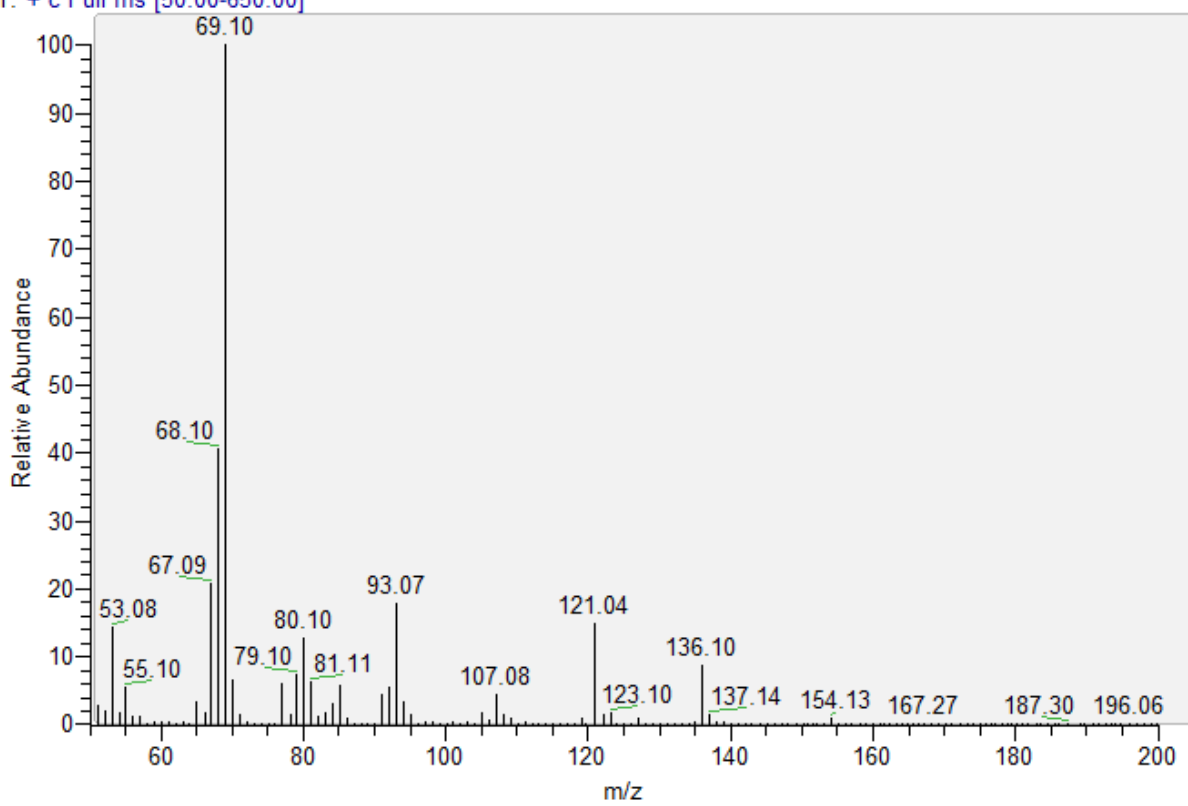

3073 #1305-1306 RT: 31.06-31.08 AV: 2 NL: 3.40E7  
T: + c Full ms [50.00-650.00]

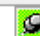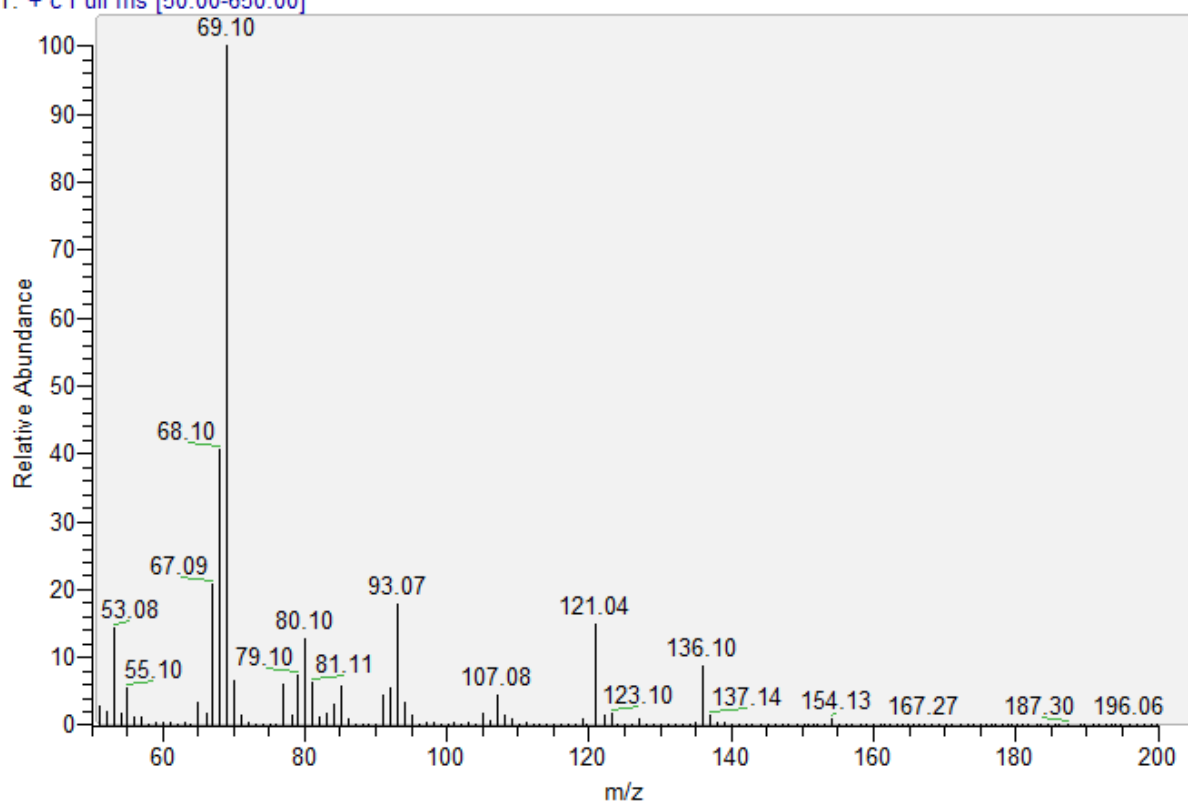

3072 #1305-1306 RT: 31.08-31.10 AV: 2 NL: 6.44E7  
T: + c Full ms [50.00-650.00]

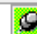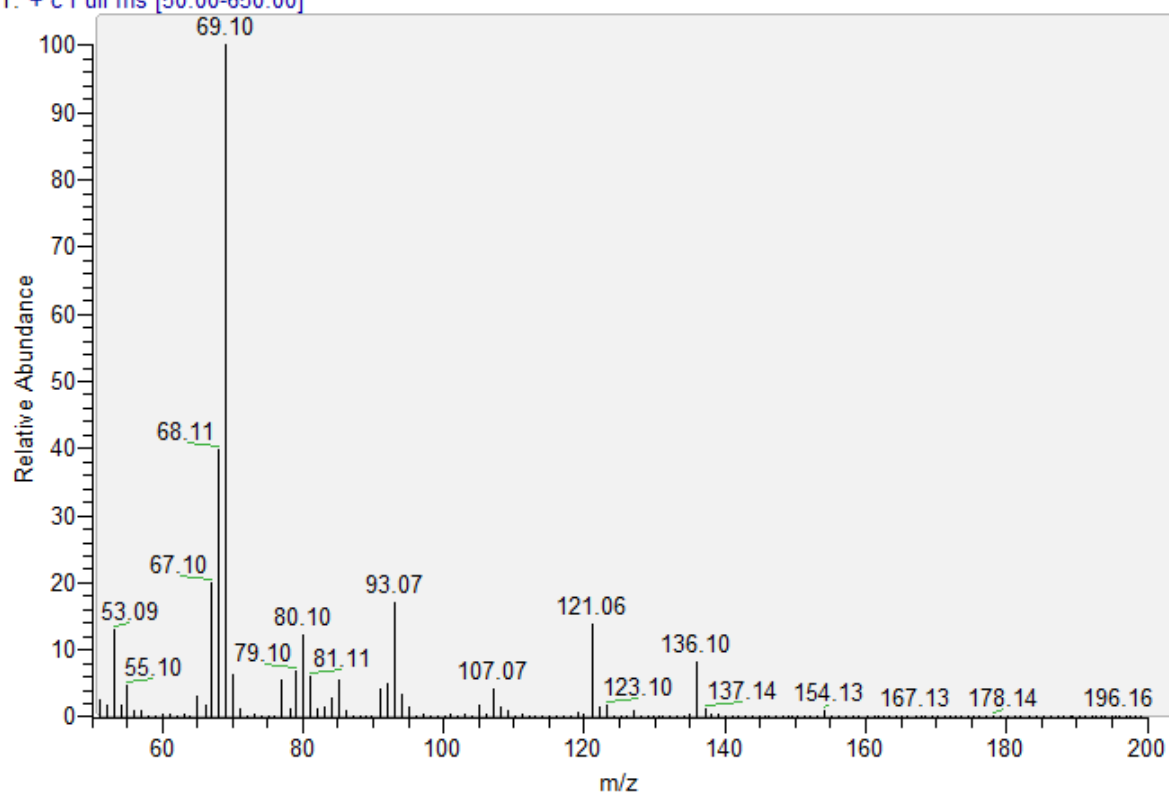

3070 #1306-1307 RT: 31.04-31.06 AV: 2 NL: 6.28E6  
T: + c Full ms [50.00-650.00]

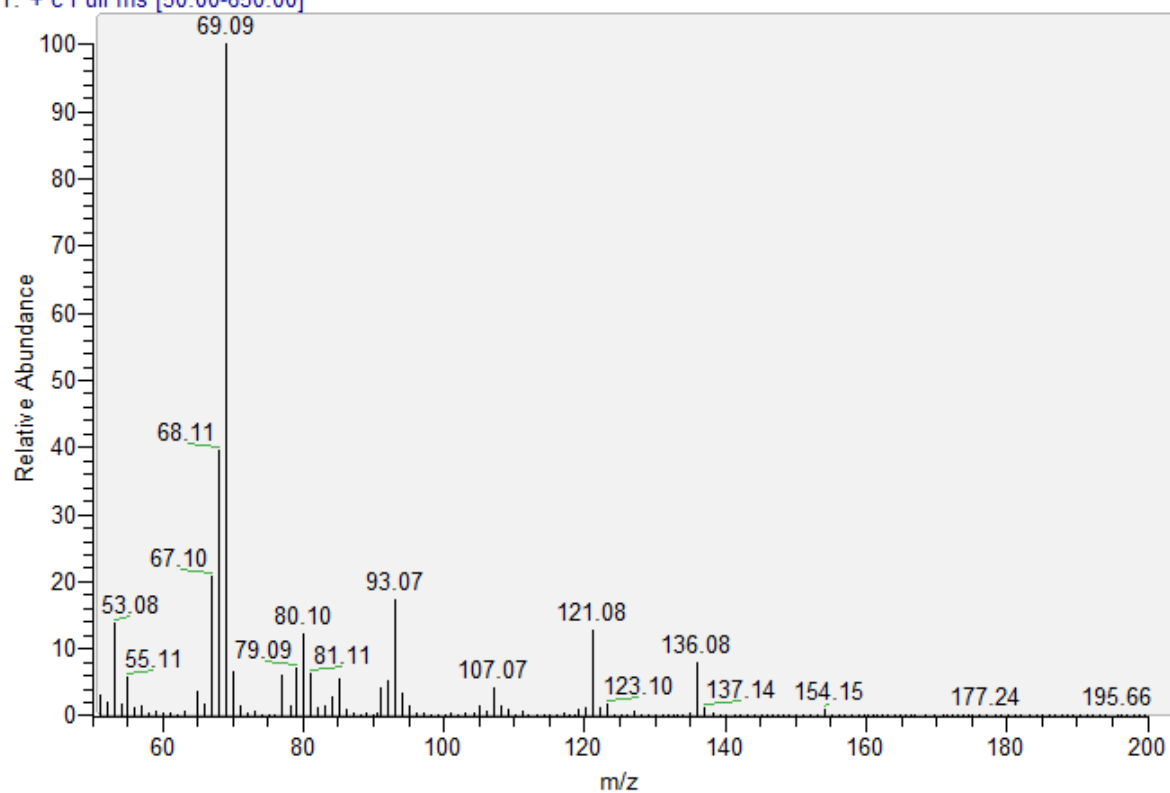

Citronellol

Reference:

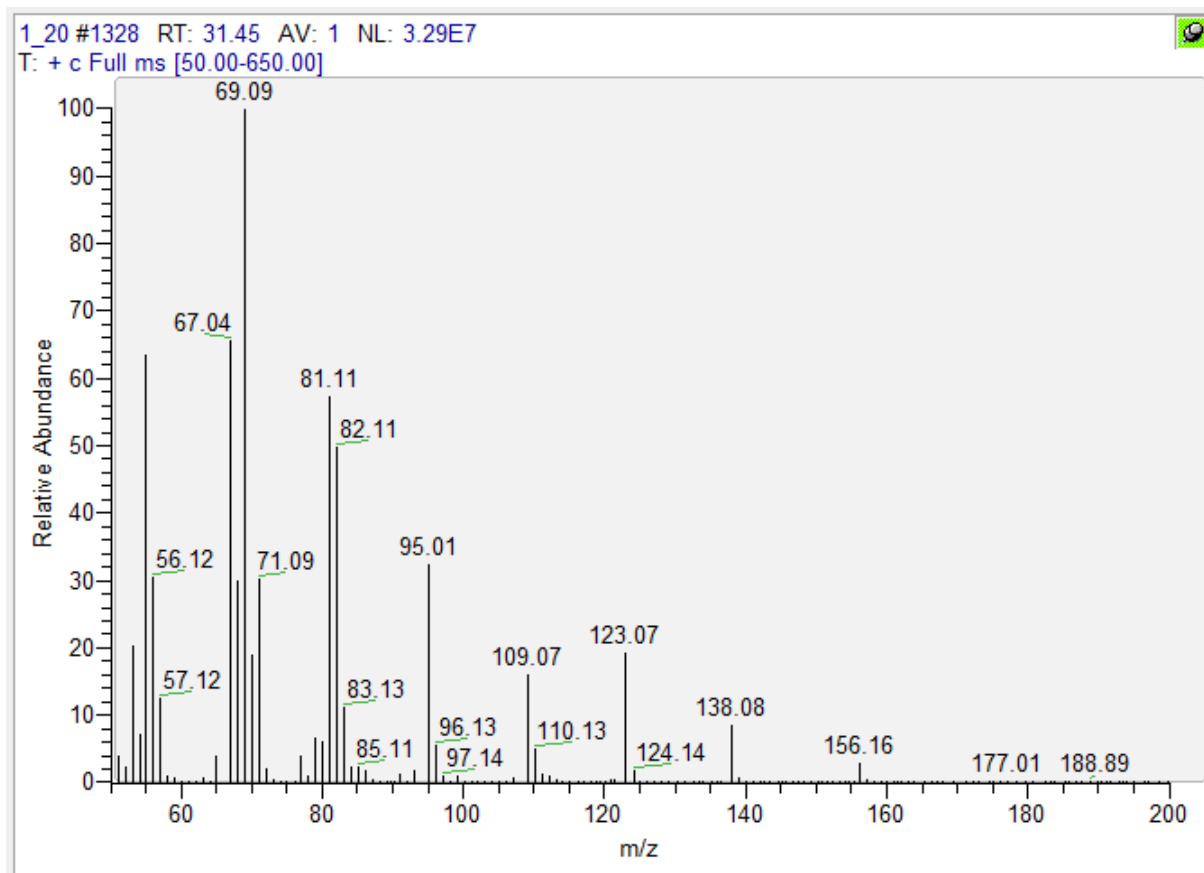

Samples:

3018 #1331-1333 RT: 31.56-31.61 AV: 3 NL: 2.74E8

T: + c Full ms [50.00-650.00]

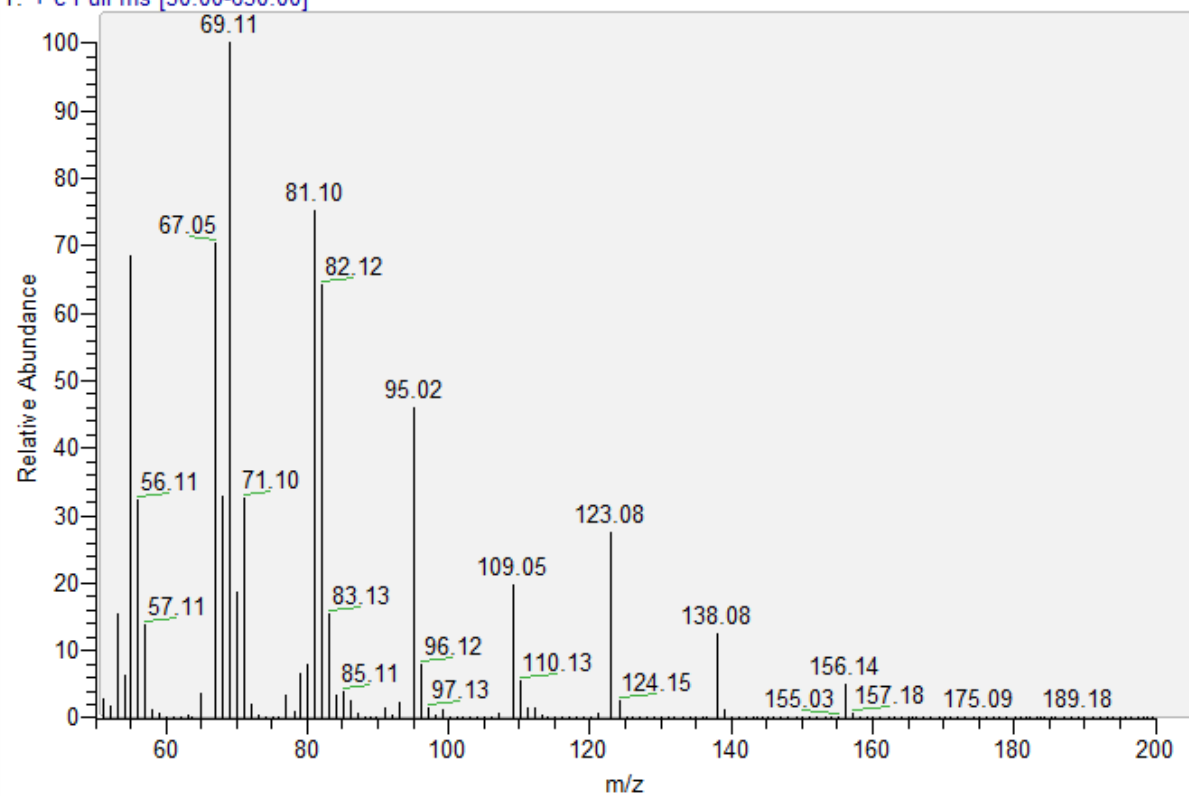



3053 #1323-1325 RT: 31.47-31.52 AV: 3 NL: 1.21E8  
T: + c Full ms [50.00-650.00]

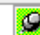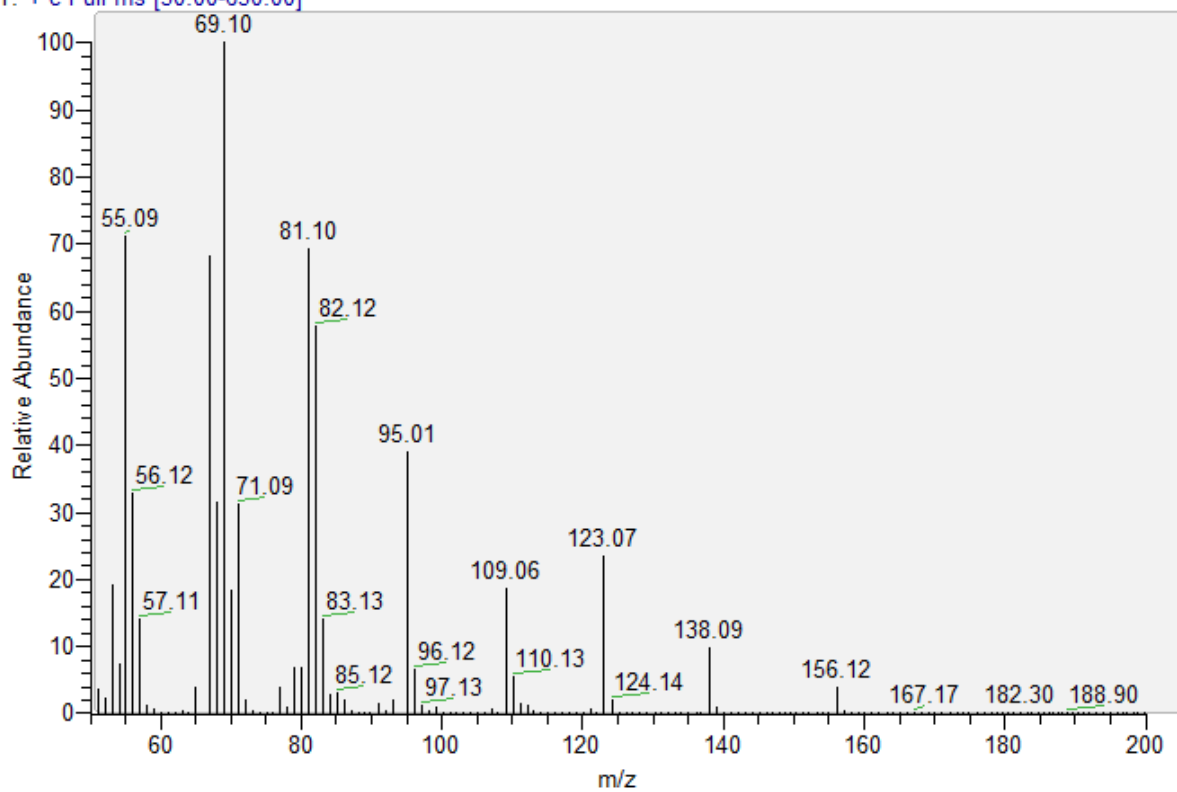

3058 #1324-1326 RT: 31.57-31.62 AV: 3 NL: 2.85E8  
T: + c Full ms [50.00-650.00]

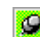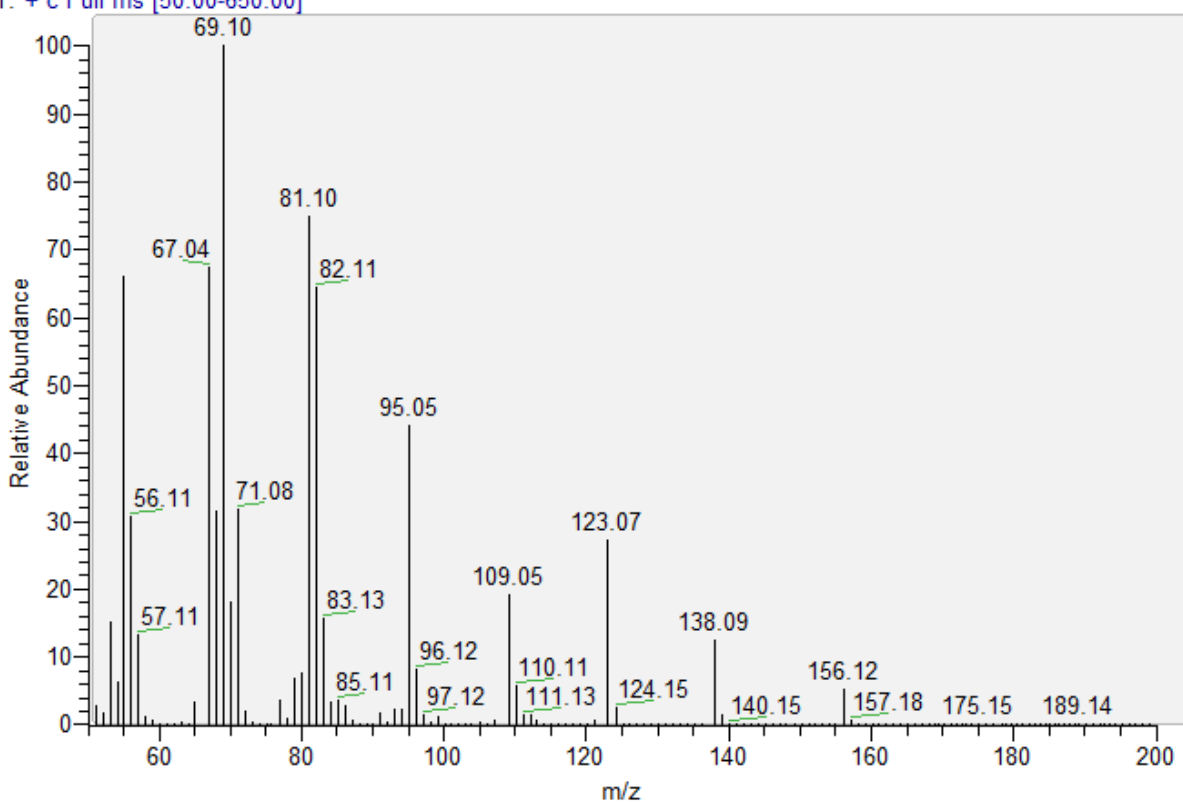

3057 #1330-1333 RT: 31.53-31.60 AV: 4 NL: 2.72E8  
T: + c Full ms [50.00-650.00]

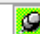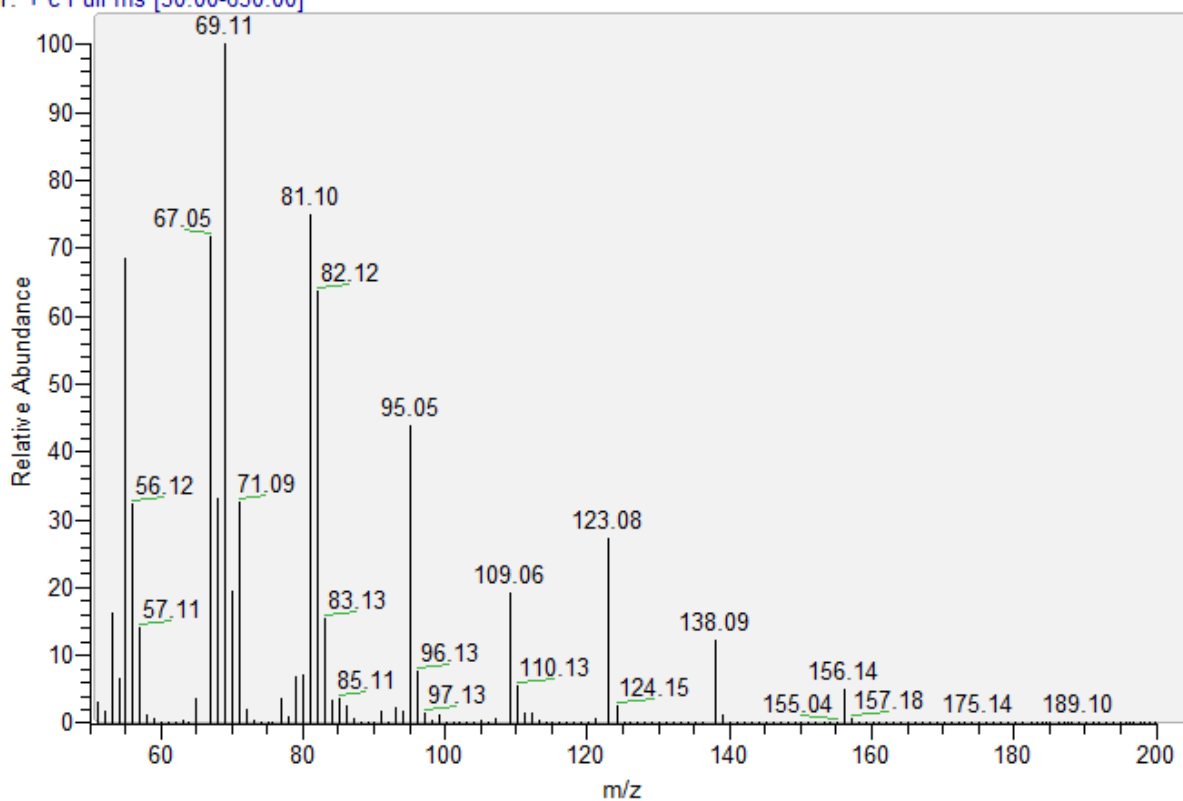

3021 #1325-1328 RT: 31.51-31.58 AV: 4 NL: 2.33E8  
T: + c Full ms [50.00-650.00]

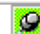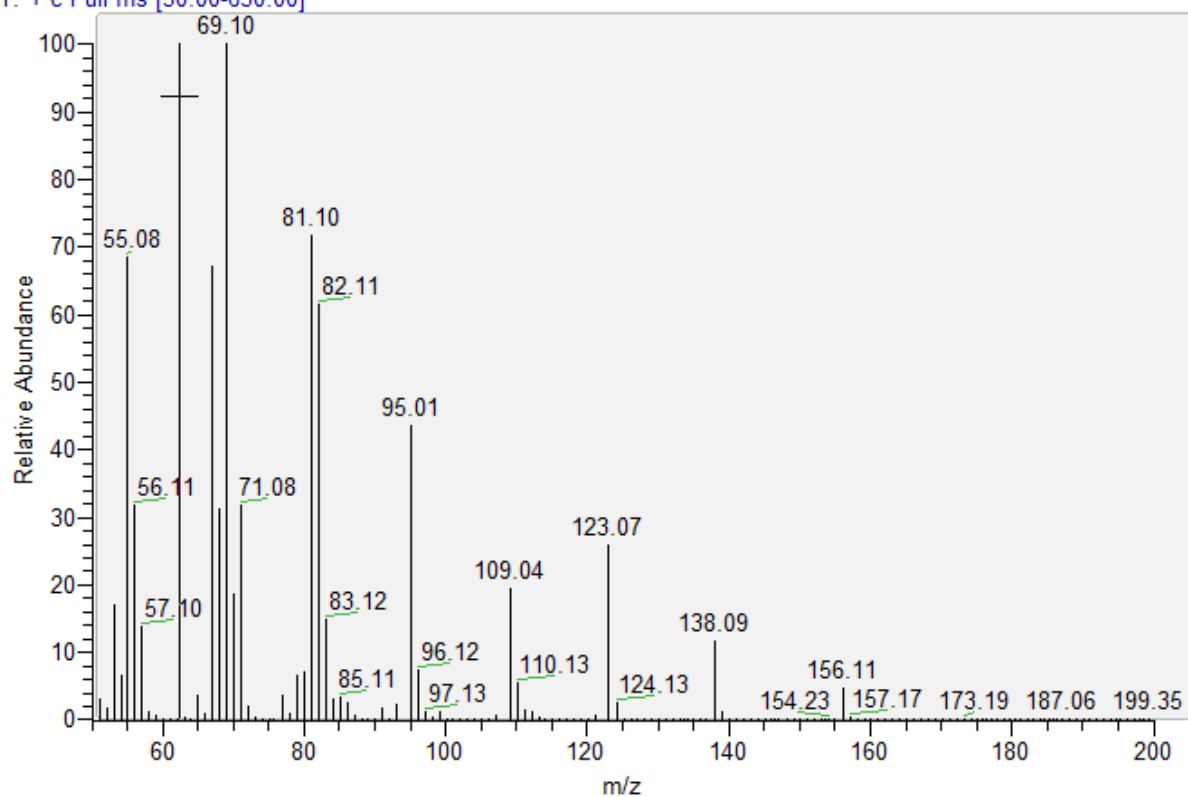

3075 #1325 RT: 31.54 AV: 1 NL: 2.05E8  
T: + c Full ms [50.00-650.00]

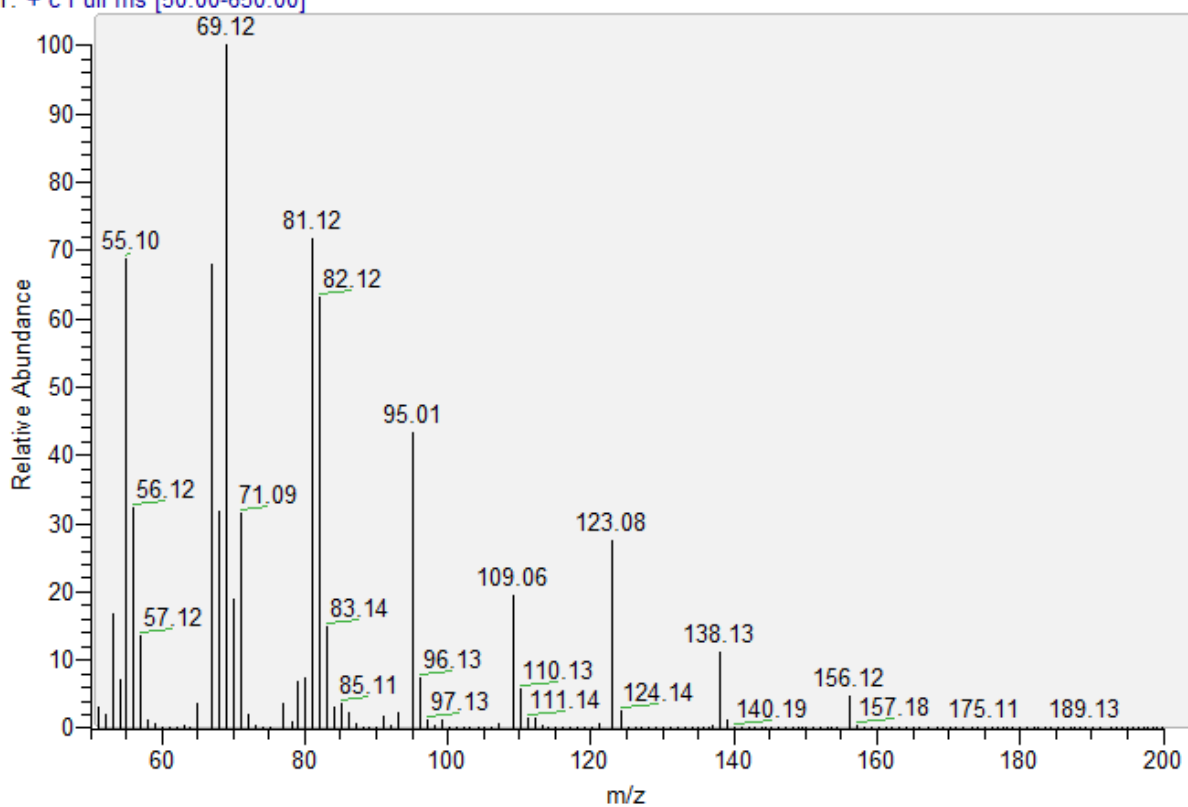

3074 #1328-1329 RT: 31.58-31.60 AV: 2 NL: 2.64E8

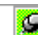

T: + c Full ms [50.00-650.00]

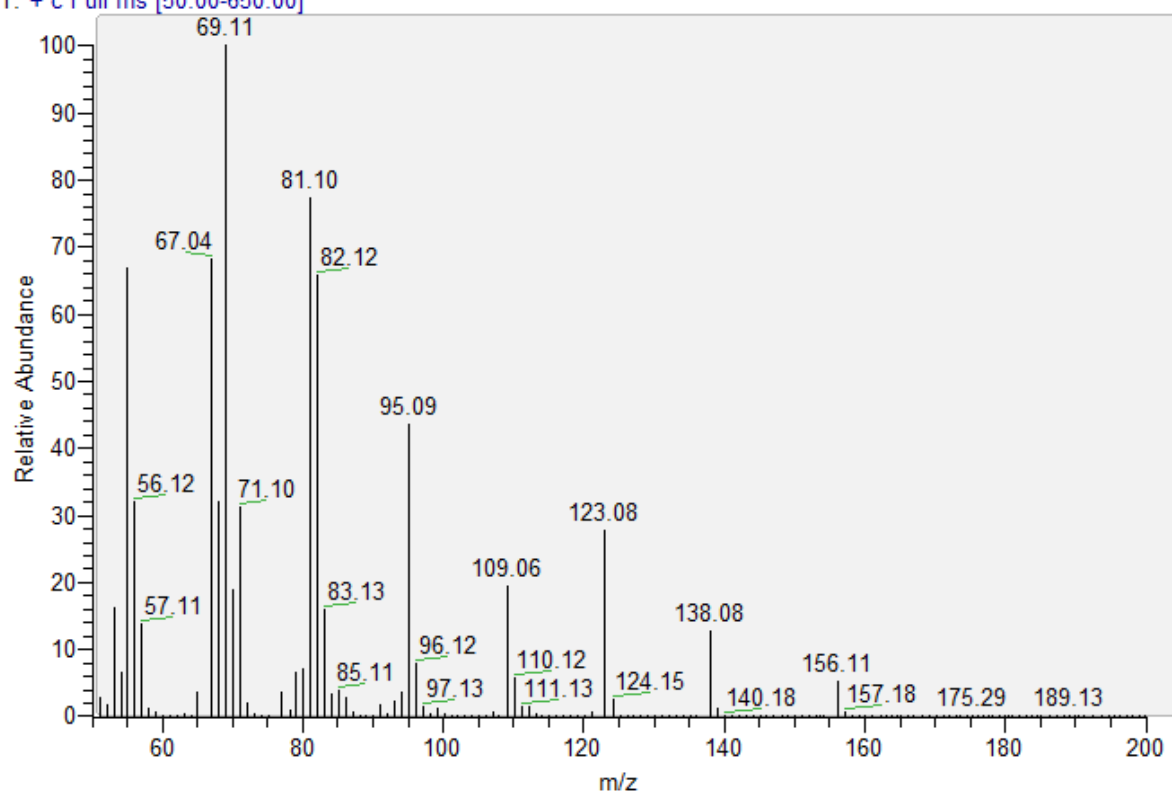

3073 #1326-1327 RT: 31.56-31.58 AV: 2 NL: 2.29E8  
T: + c Full ms [50.00-650.00]

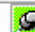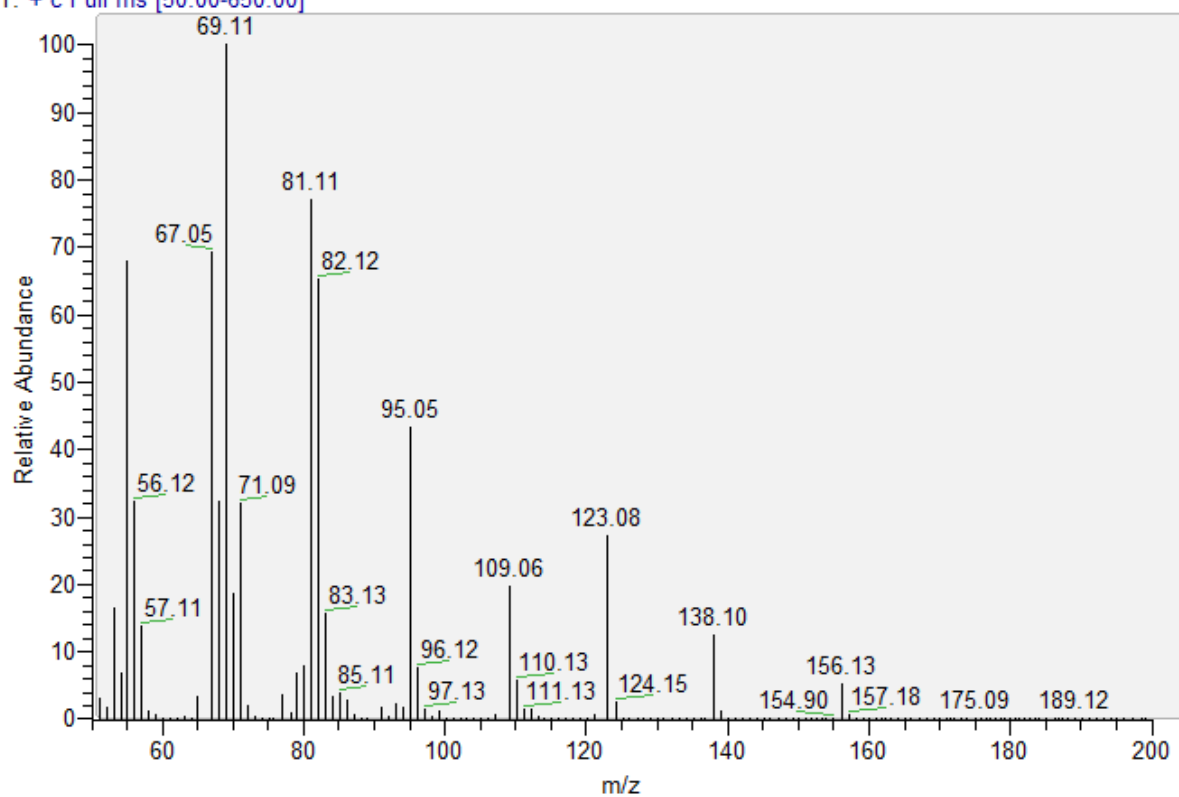

3073 #1325-1327 RT: 31.53-31.58 AV: 3 NL: 2.14E8  
T: + c Full ms [50.00-650.00]

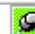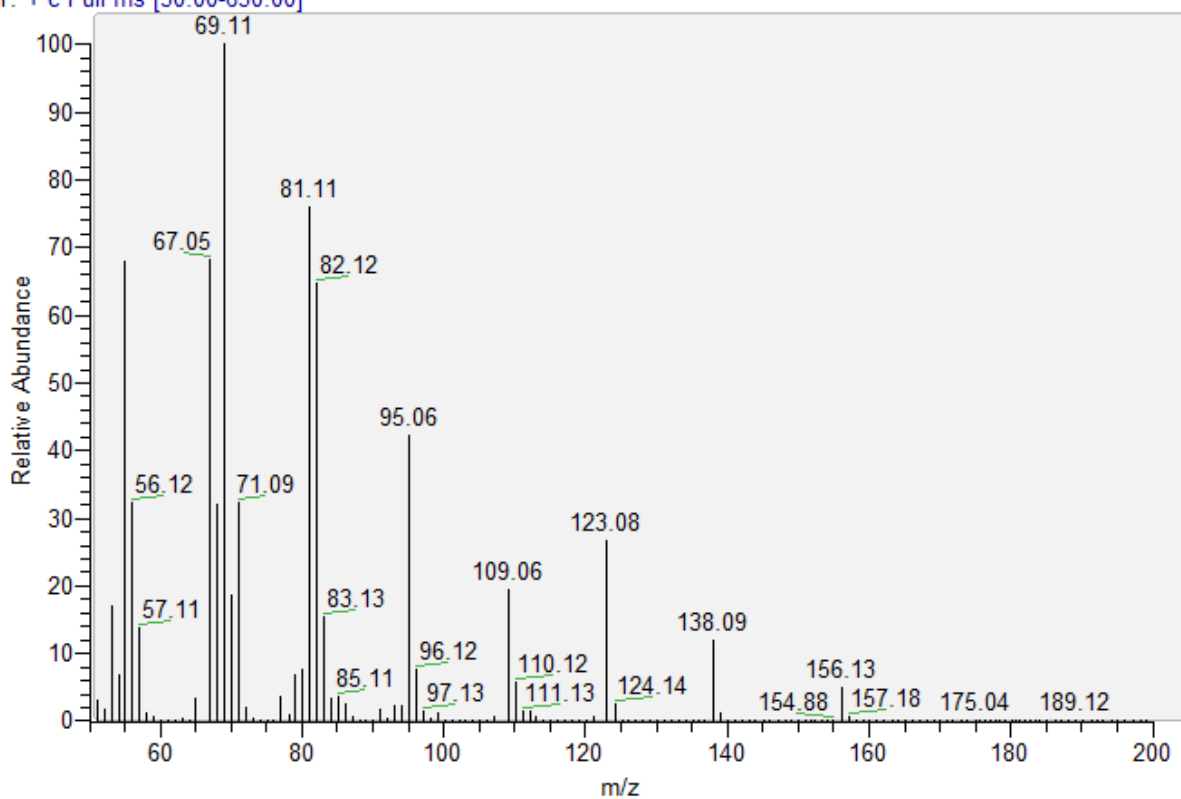



3072 #1326-1329 RT: 31.58-31.65 AV: 4 NL: 2.71E8  
T: + c Full ms [50.00-650.00]

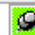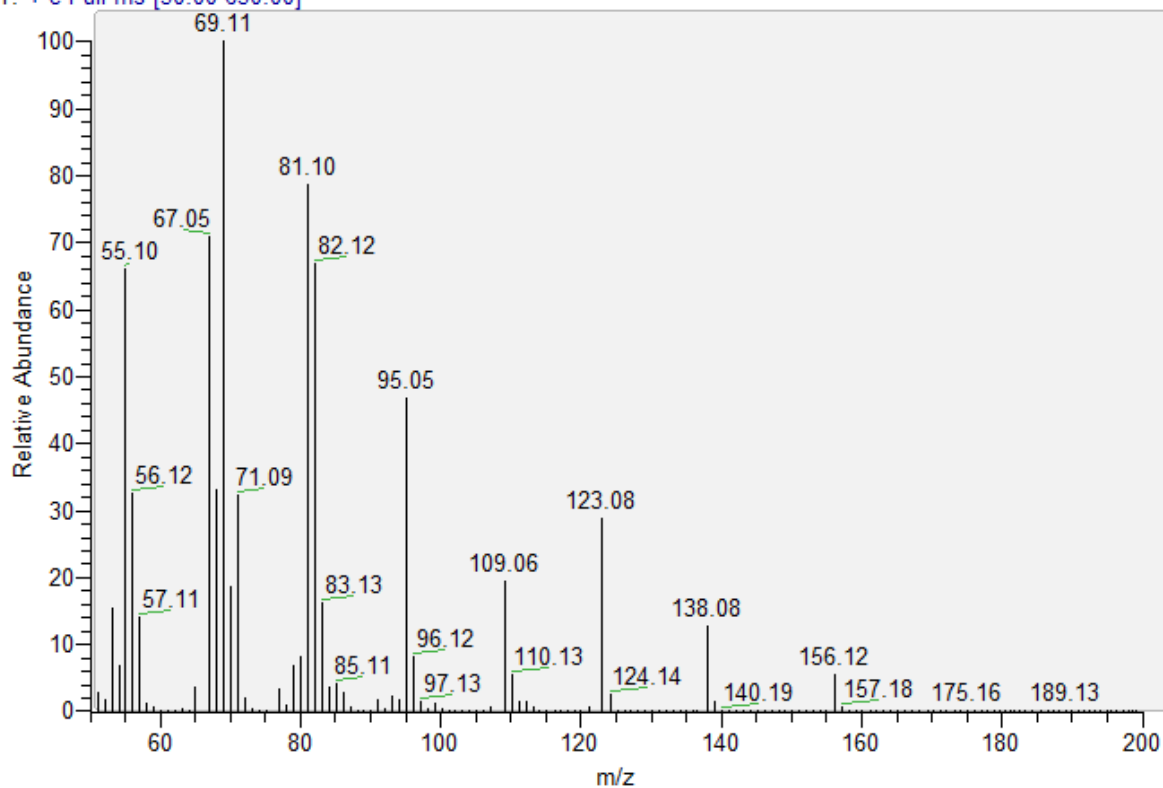

3070 #1324-1325 RT: 31.46-31.49 AV: 2 NL: 7.33E7  
T: + c Full ms [50.00-650.00]

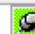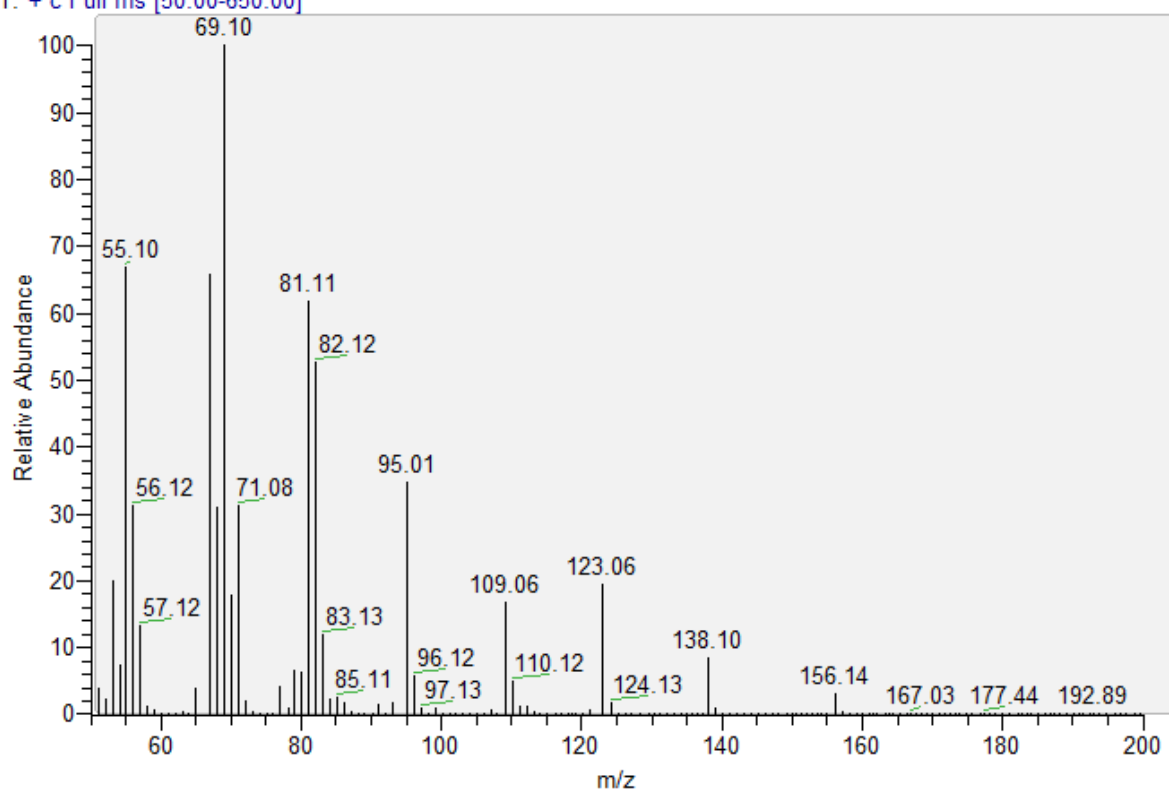

Nerol

Reference:

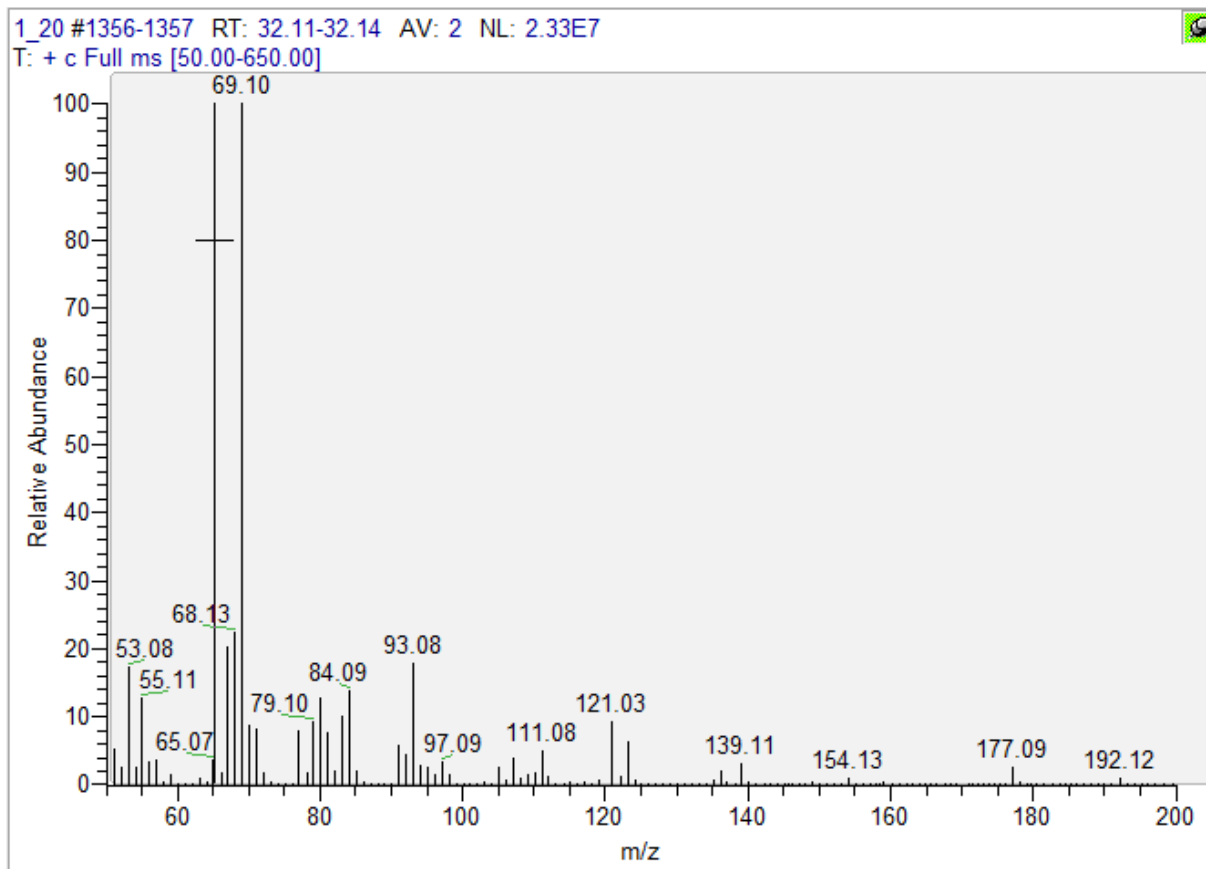

Samples:

3018 #1358-1360 RT: 32.21-32.26 AV: 3 NL: 3.51E8

T: + c Full ms [50.00-650.00]

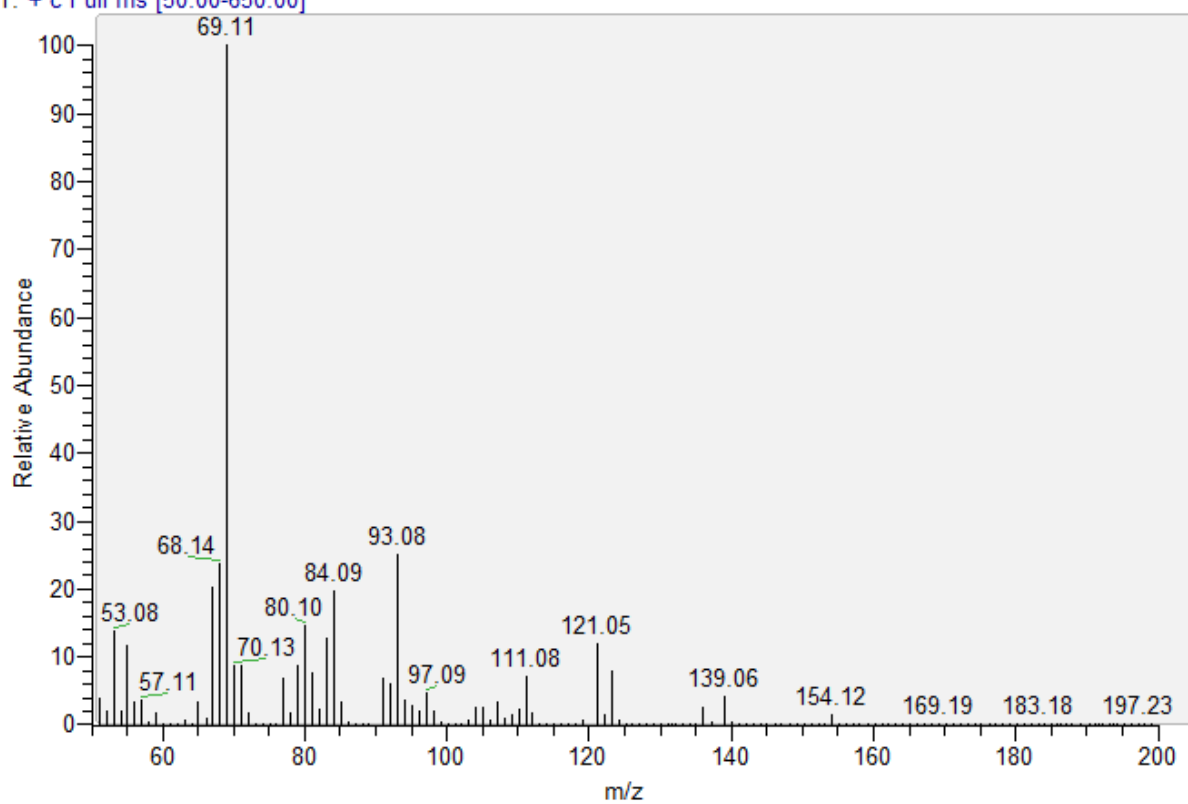

3053 #1351-1352 RT: 32.14-32.17 AV: 2 NL: 7.77E7  
T: + c Full ms [50.00-650.00]

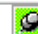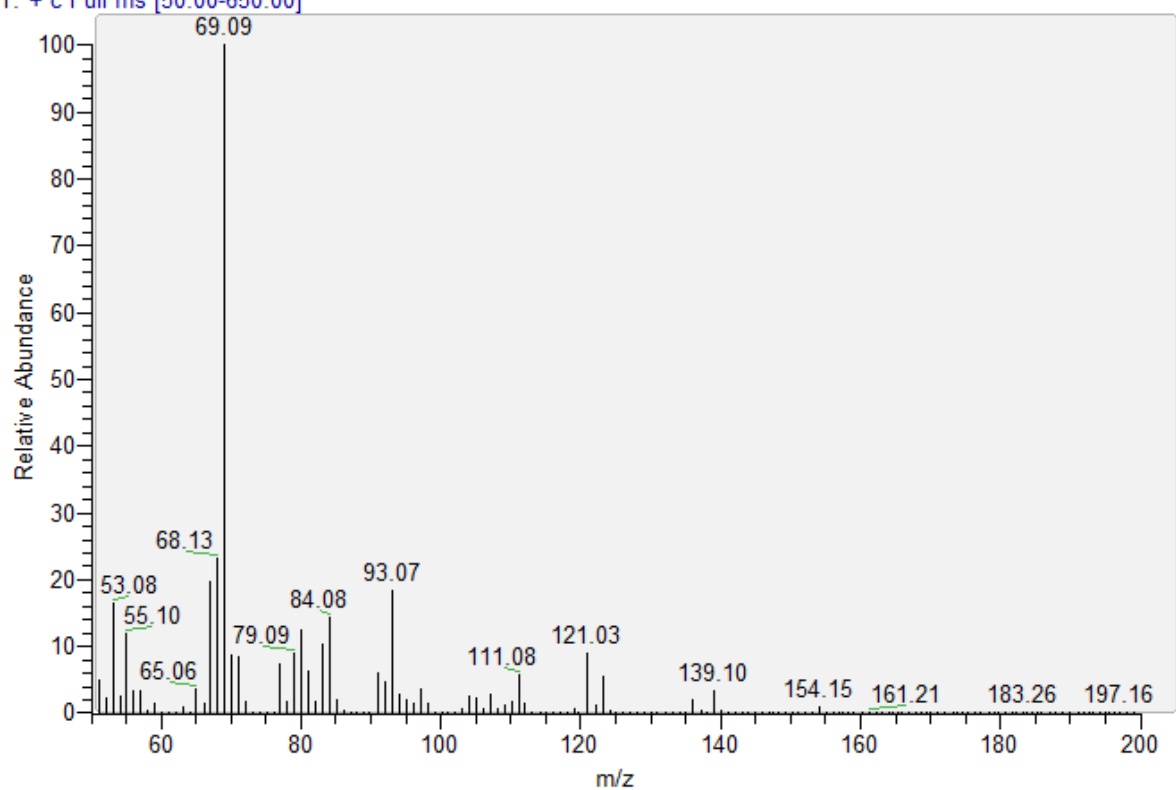

3058 #1349-1351 RT: 32.17-32.22 AV: 3 NL: 4.52E7

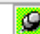

T: + c Full ms [50.00-650.00]

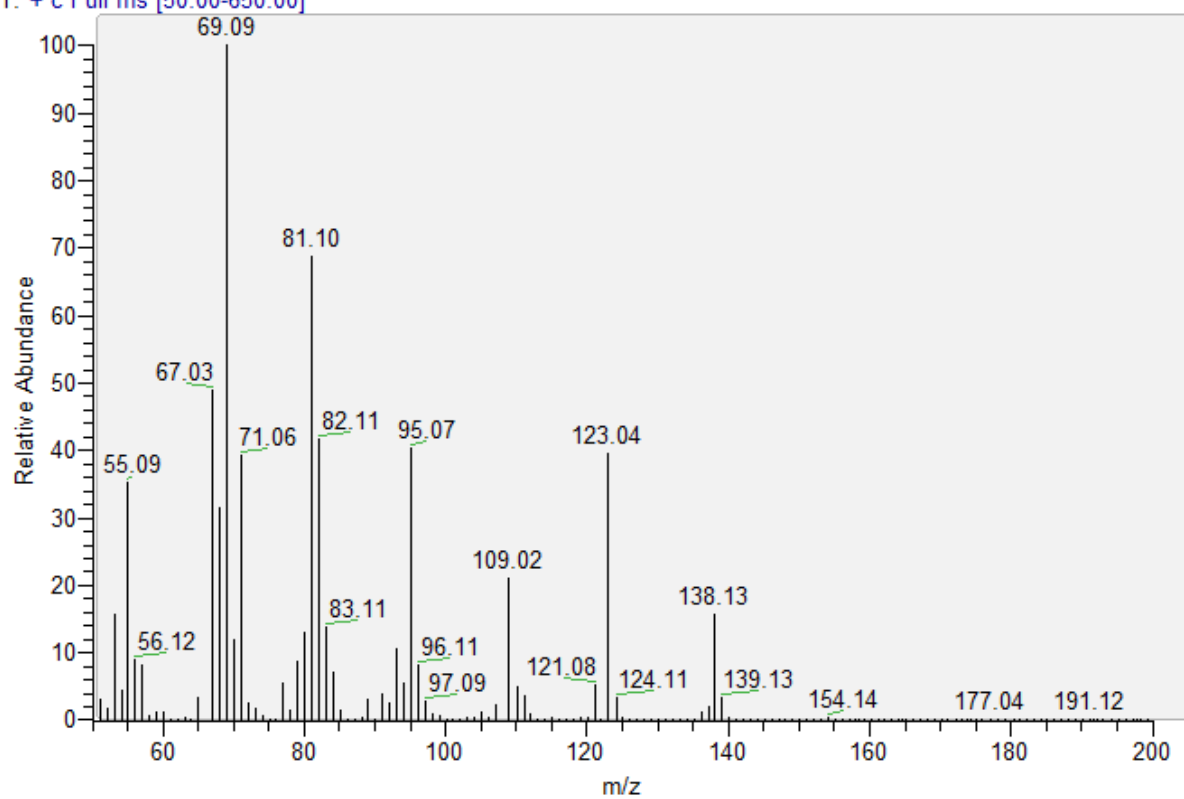

3057 #1354-1356 RT: 32.10-32.15 AV: 3 NL: 1.96E7  
T: + c Full ms [50.00-650.00]

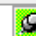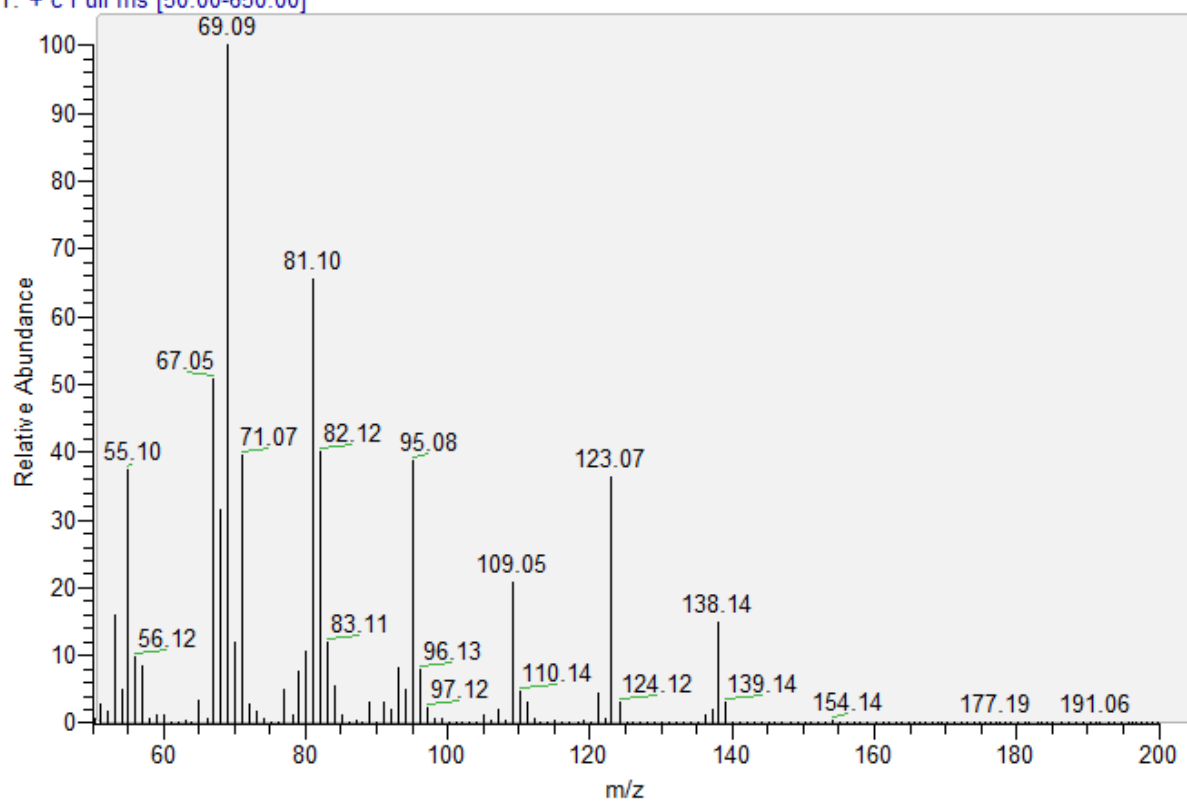

3021 #1356-1358 RT: 32.25-32.30 AV: 3 NL: 3.79E8  
T: + c Full ms [50.00-650.00]

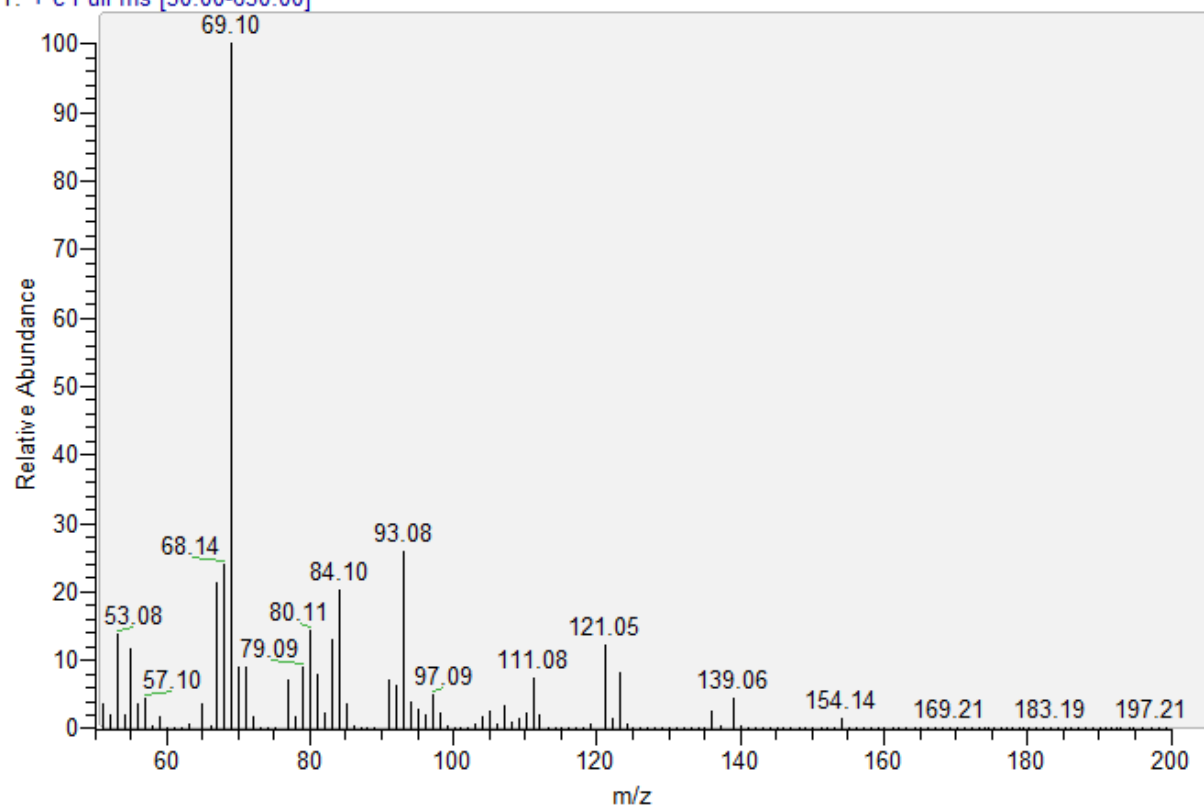



3075 #1351-1354 RT: 32.17-32.24 AV: 4 NL: 2.04E8  
T: + c Full ms [50.00-650.00]

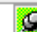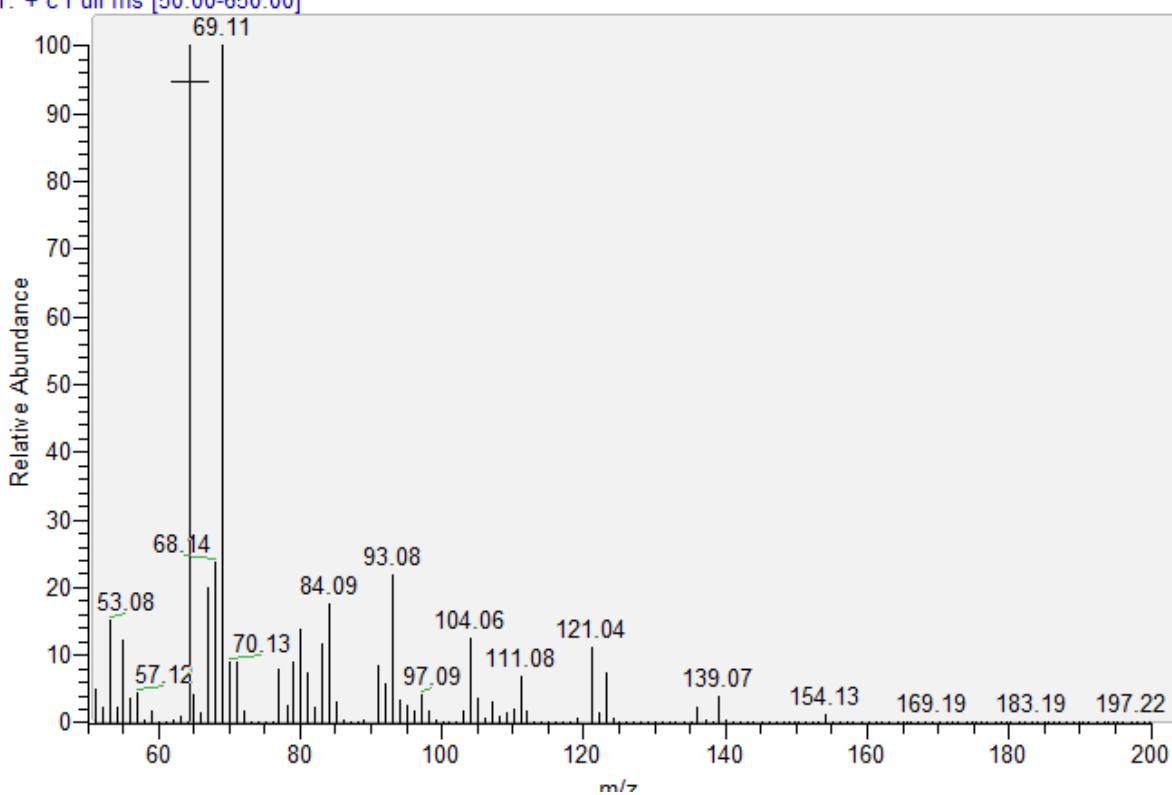

3074 #1354-1355 RT: 32.20-32.22 AV: 2 NL: 2.65E8

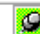

T: + c Full ms [50.00-650.00]

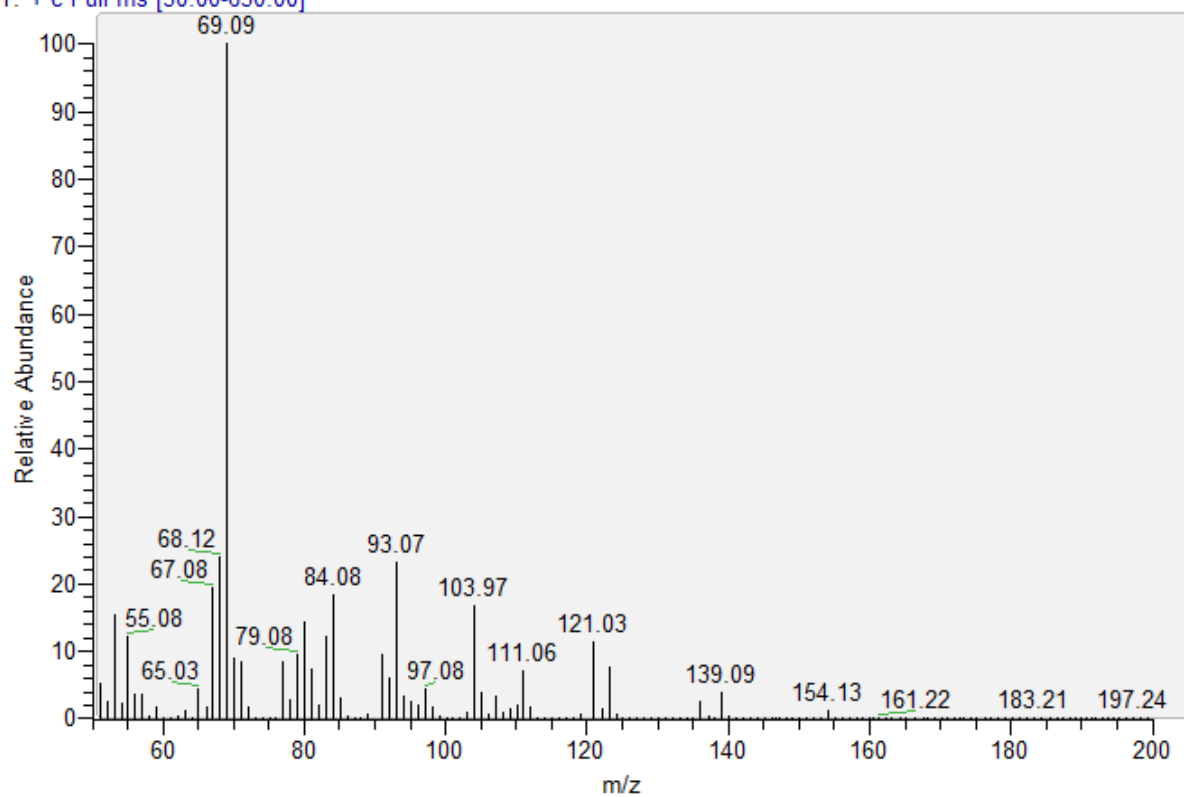

3073 #1353-1354 RT: 32.20-32.23 AV: 2 NL: 2.95E8  
T: + c Full ms [50.00-650.00]

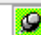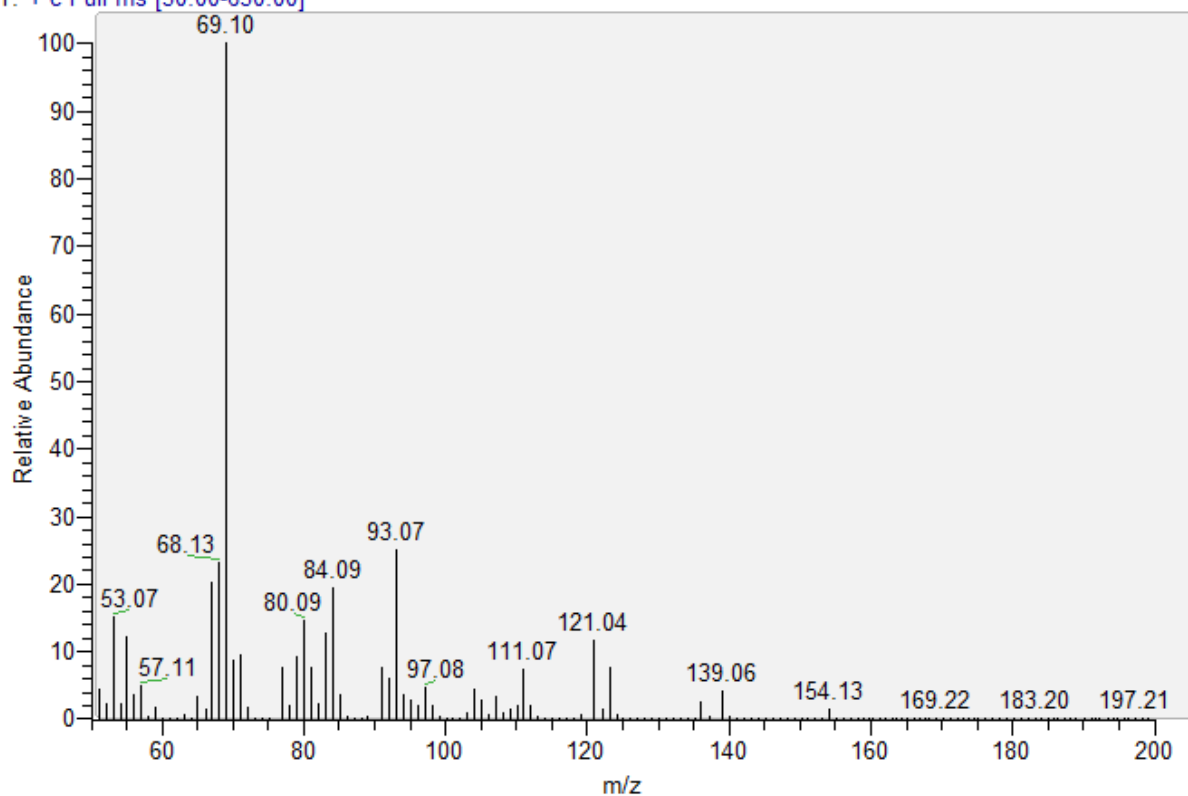

3072 #1354-1356 RT: 32.25-32.29 AV: 3 NL: 3.85E8  
T: + c Full ms [50.00-650.00]

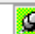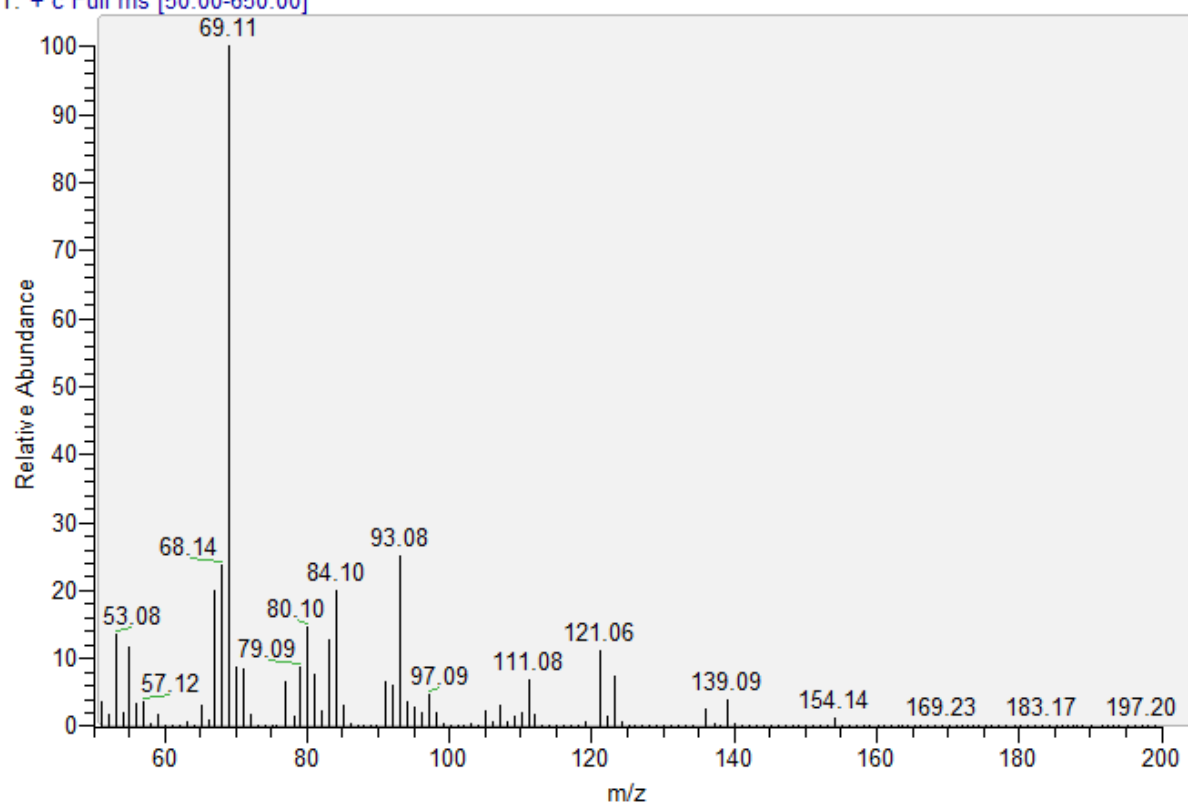

3070 #1351-1353 RT: 32.11-32.16 AV: 3 NL: 4.13E7  
T: + c Full ms [50.00-650.00]

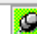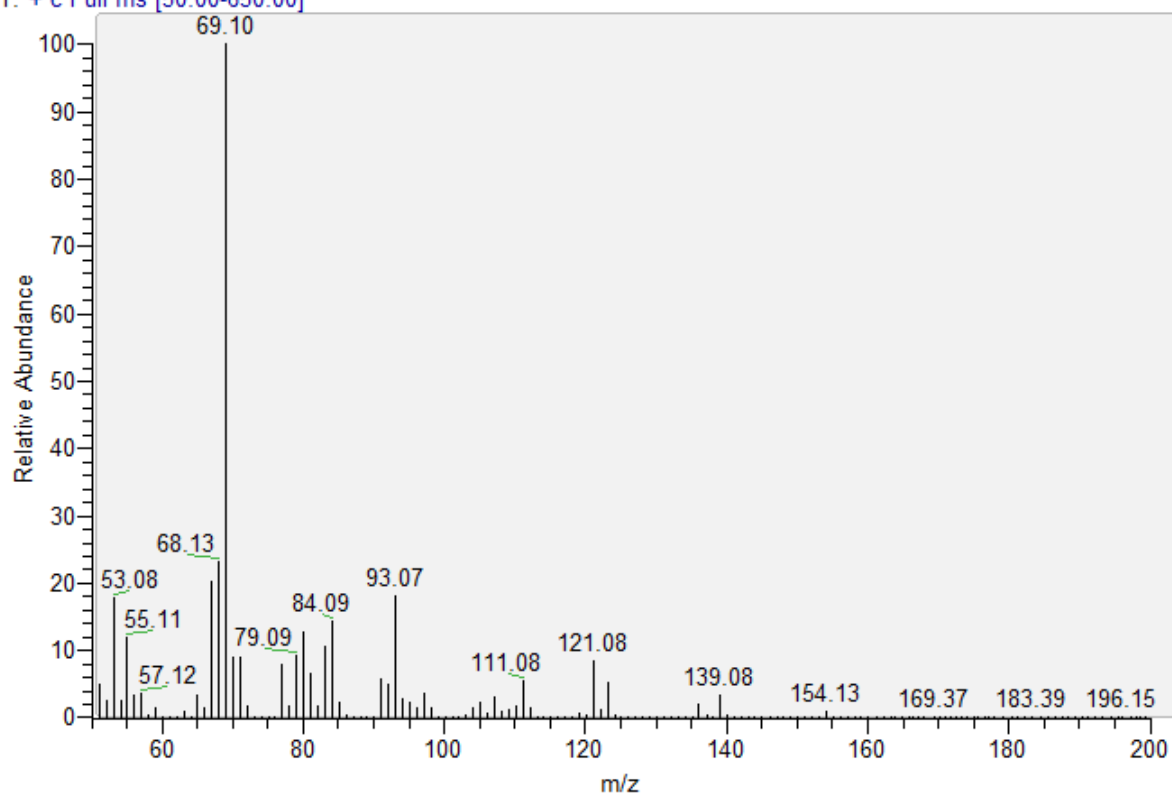

Phenylethanol

Reference

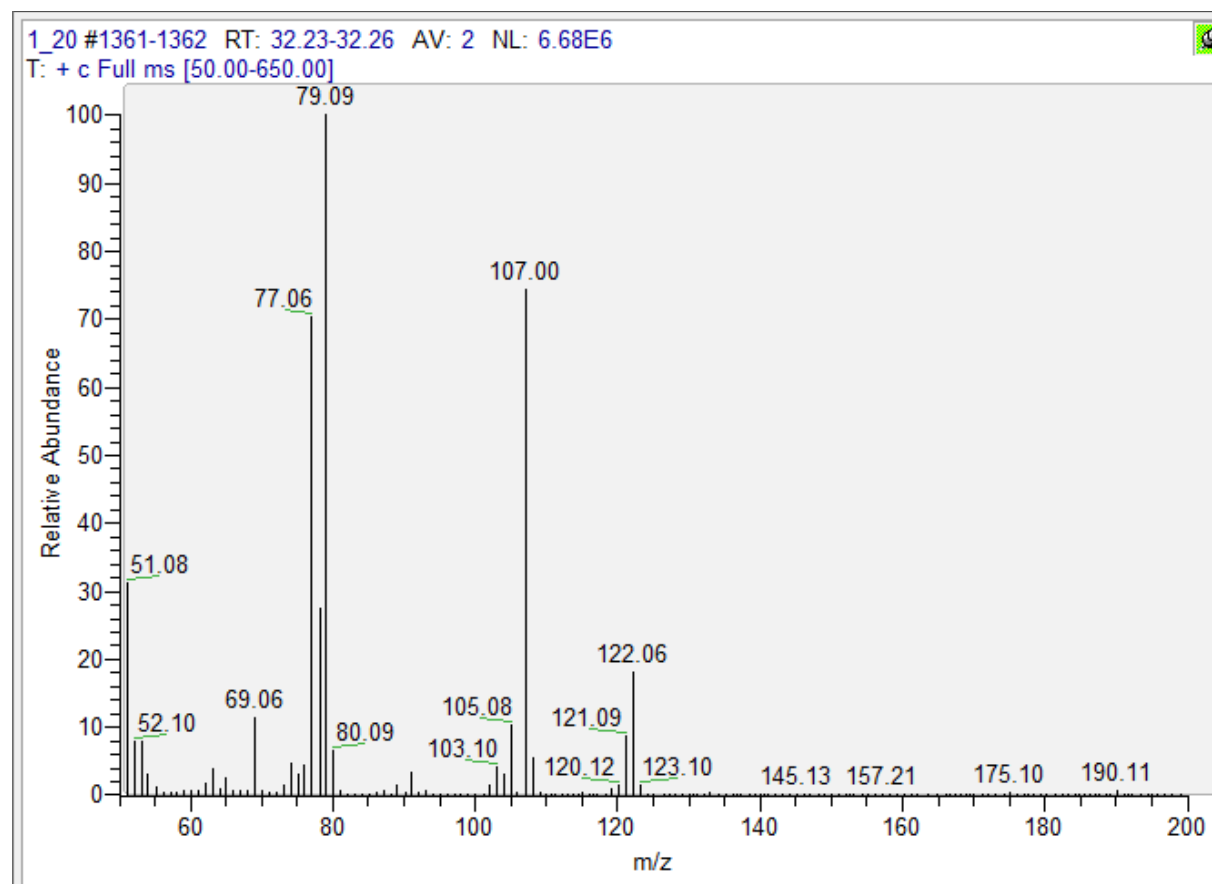

## Samples

3057 #1361-1362 RT: 32.27-32.29 AV: 2 NL: 1.16E6

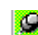

T: + c Full ms [50.00-650.00]

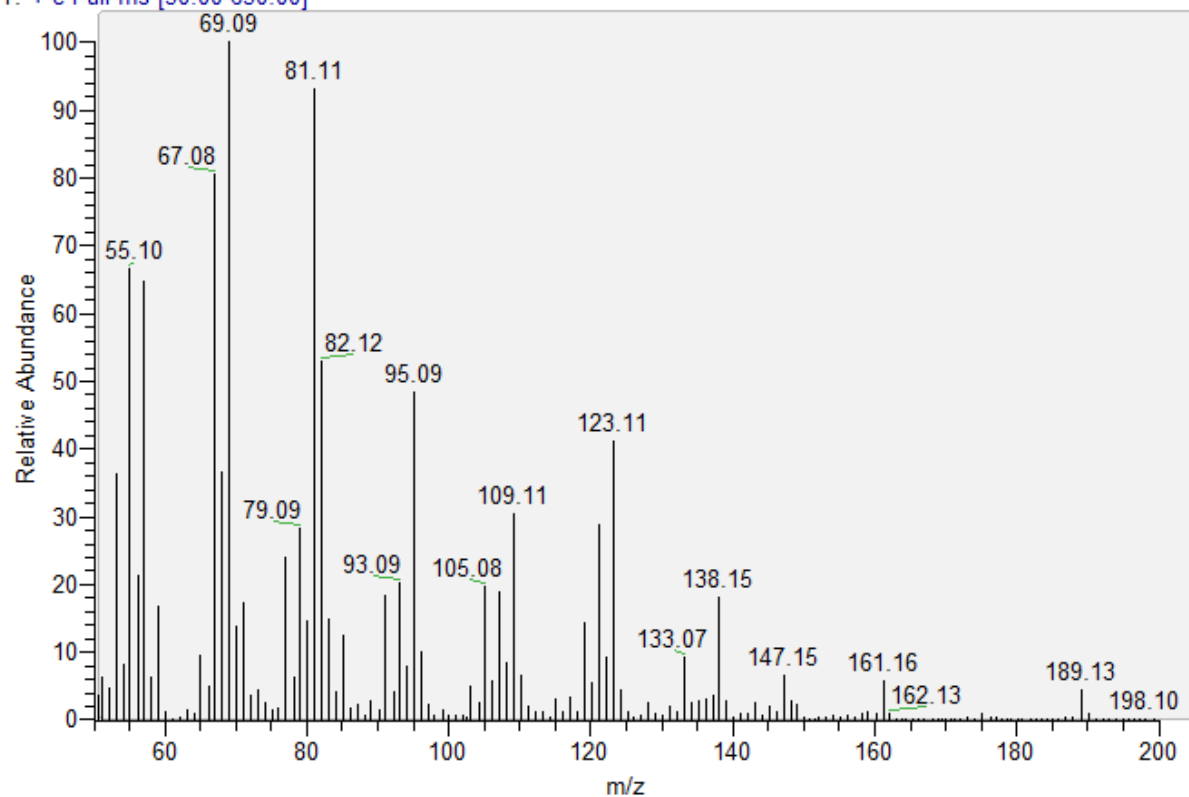

3058 #1351-1352 RT: 32.22-32.24 AV: 2 NL: 4.46E7  
T: + c Full ms [50.00-650.00]

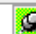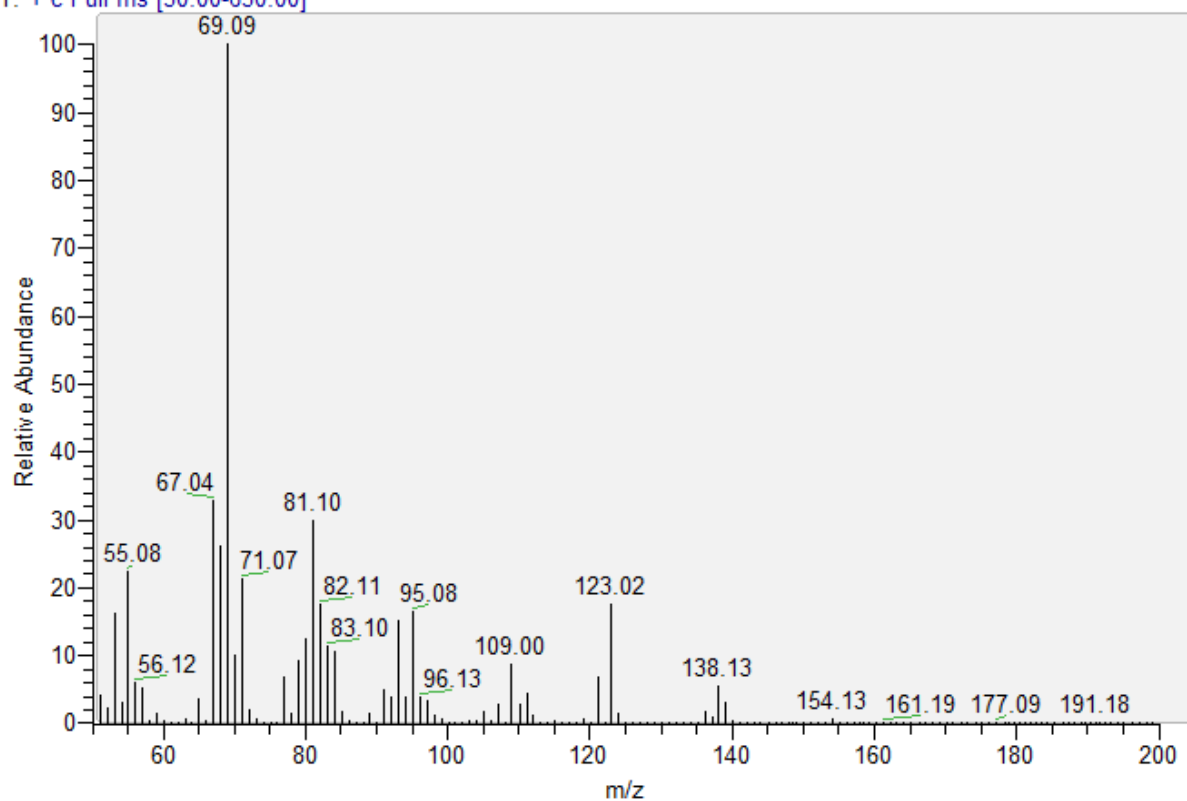



3053 #1353-1355 RT: 32.19-32.24 AV: 3 NL: 1.52E6  
T: + c Full ms [50.00-650.00]

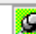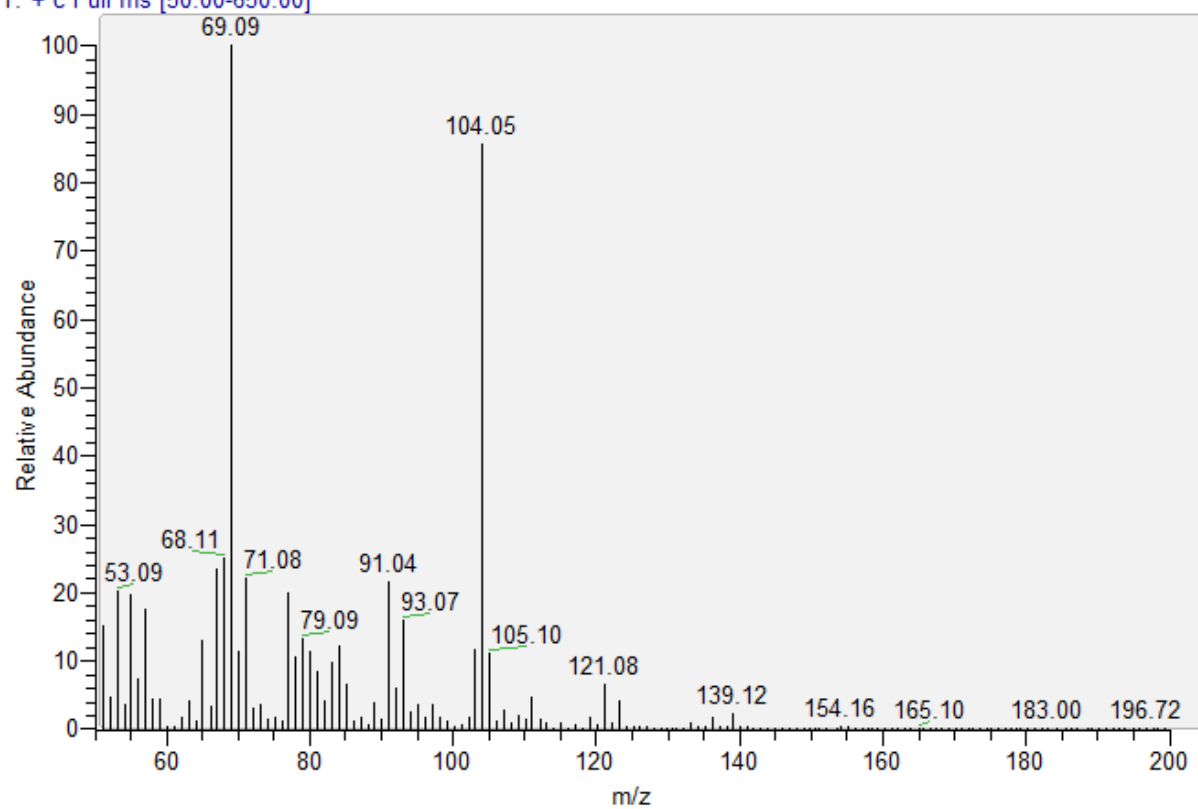

3018 #1359-1360 RT: 32.23-32.26 AV: 2 NL: 3.98E8  
T: + c Full ms [50.00-650.00]

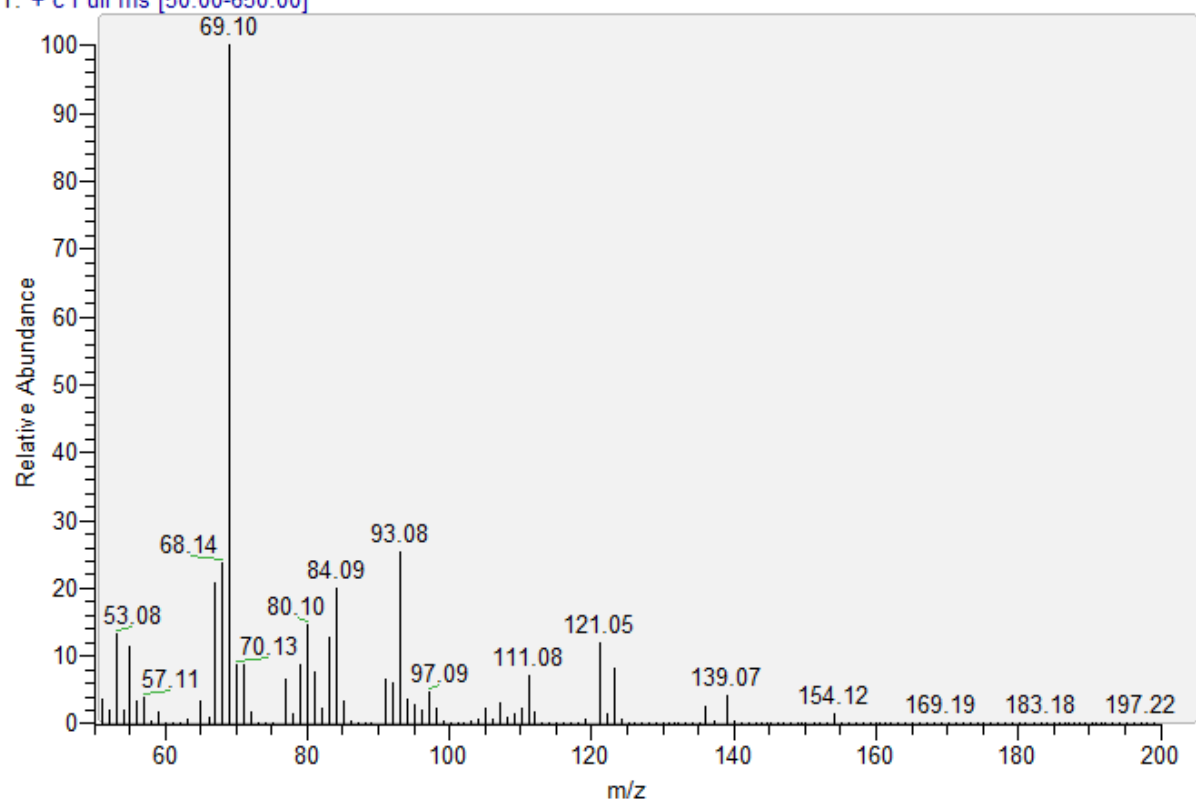

3021 #1356-1358 RT: 32.25-32.30 AV: 3 NL: 3.79E8  
T: + c Full ms [50.00-650.00]

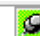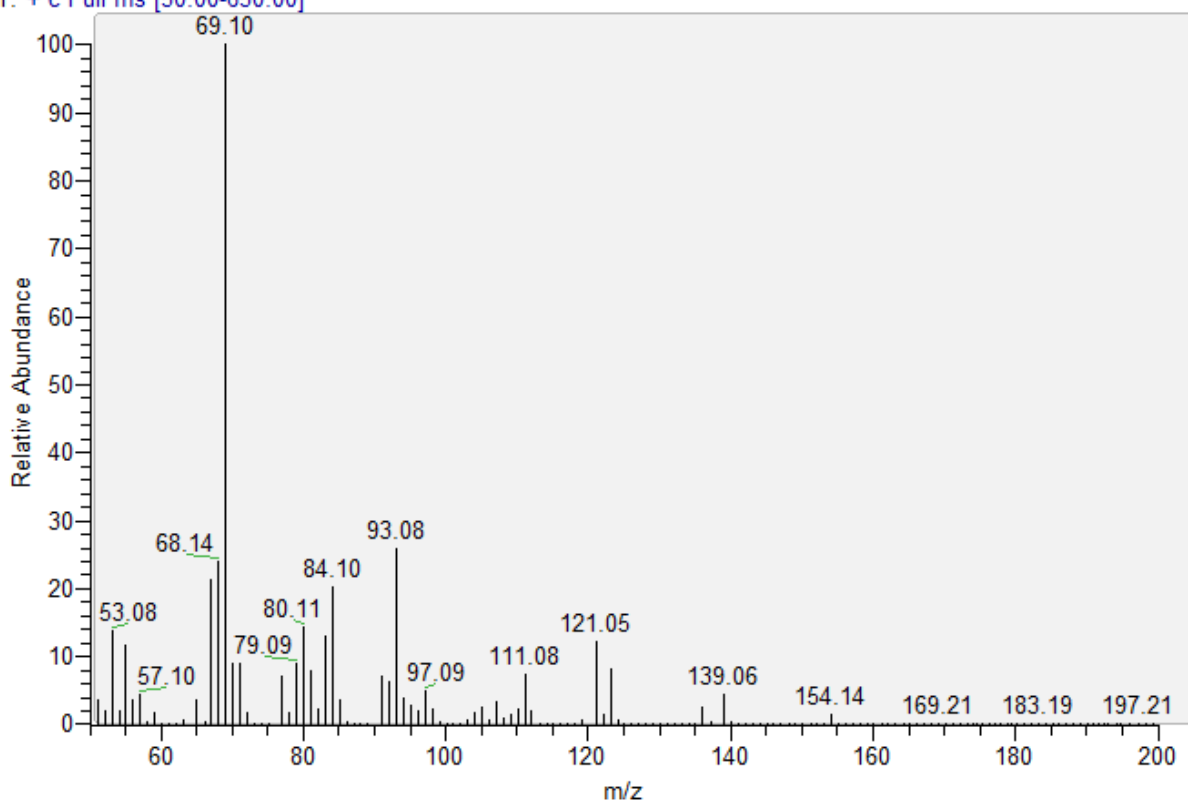

3075 #1353-1354 RT: 32.21-32.24 AV: 2 NL: 2.88E8  
T: + c Full ms [50.00-650.00]

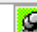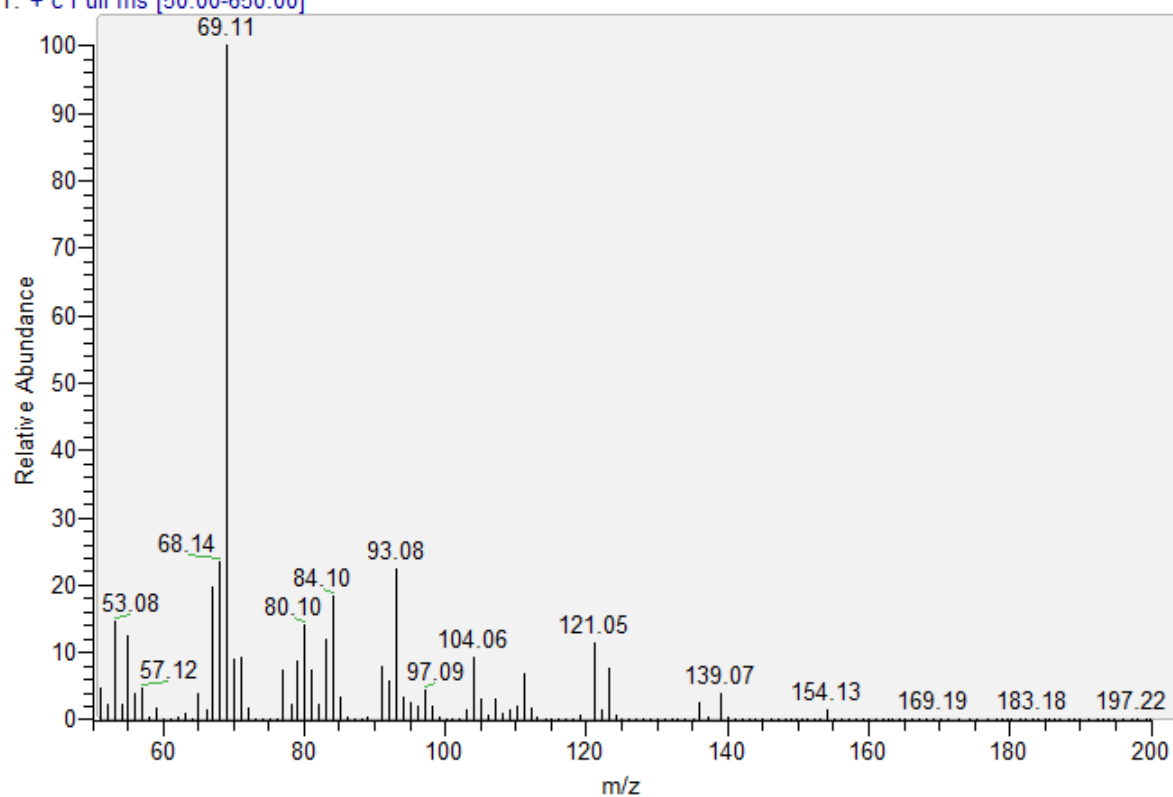

3074 #1356 RT: 32.24 AV: 1 NL: 3.65E8  
T: + c Full ms [50.00-650.00]

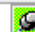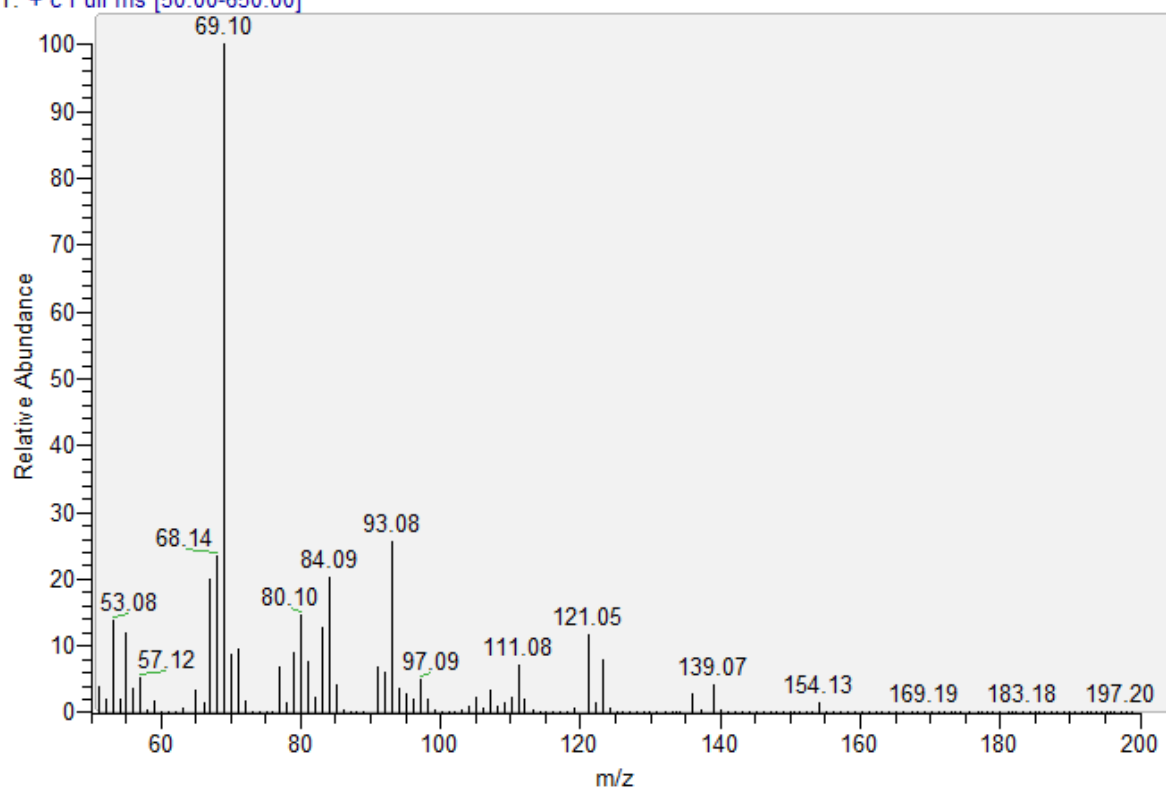

3073 #1354 RT: 32.23 AV: 1 NL: 3.36E8

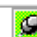

T: + c Full ms [50.00-650.00]

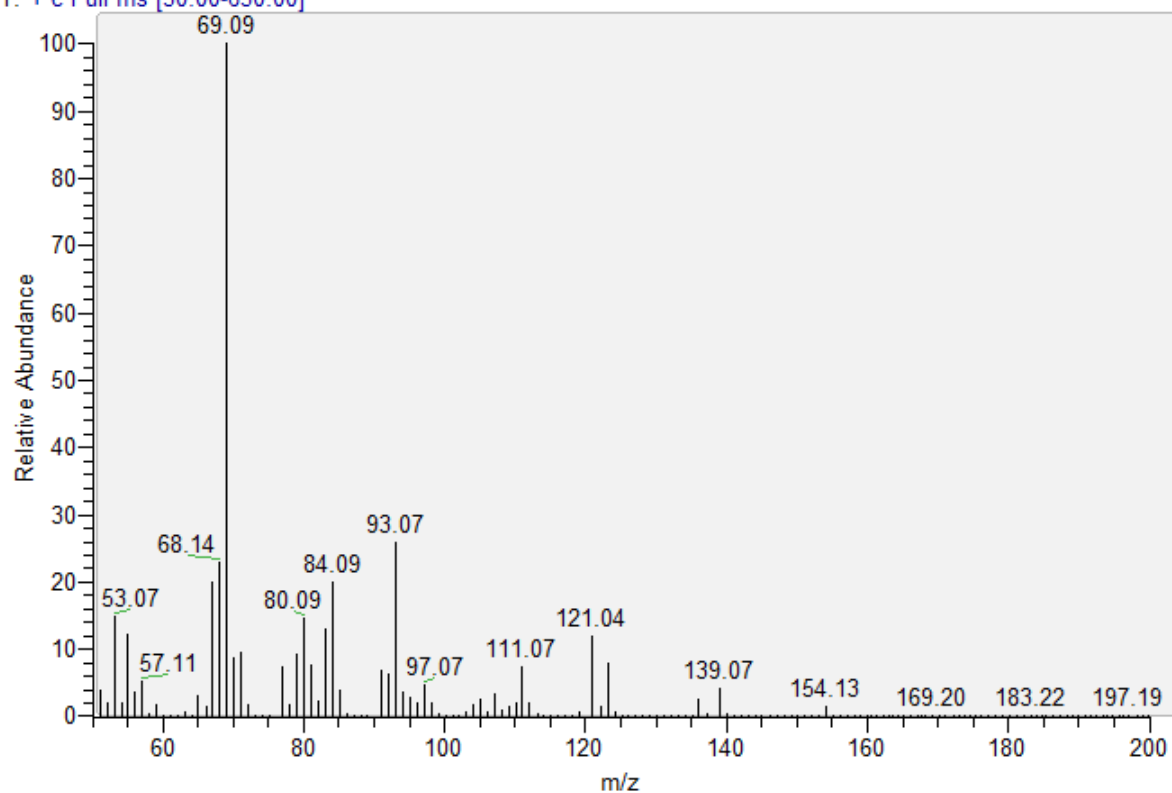

3073 #1354 RT: 32.23 AV: 1 NL: 3.36E8

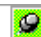

T: + c Full ms [50.00-650.00]

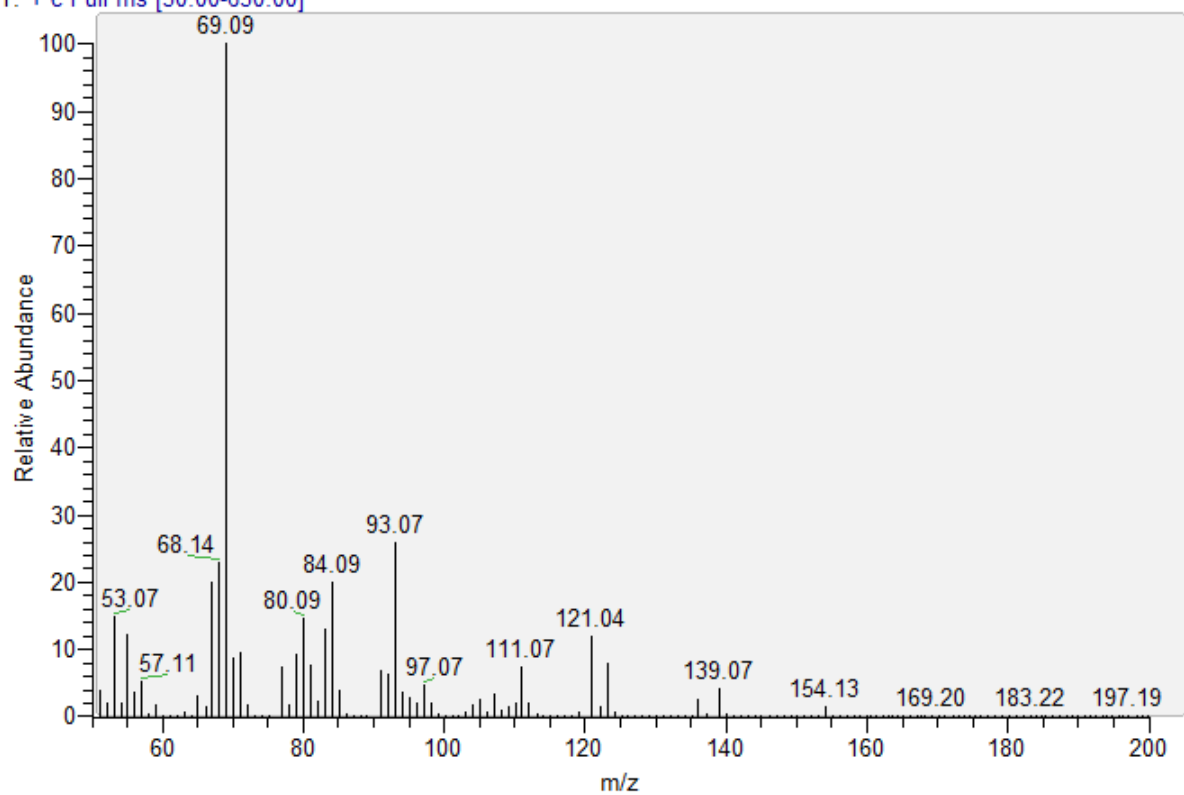

3072 #1355 RT: 32.27 AV: 1 NL: 4.20E8  
T: + c Full ms [50.00-650.00]

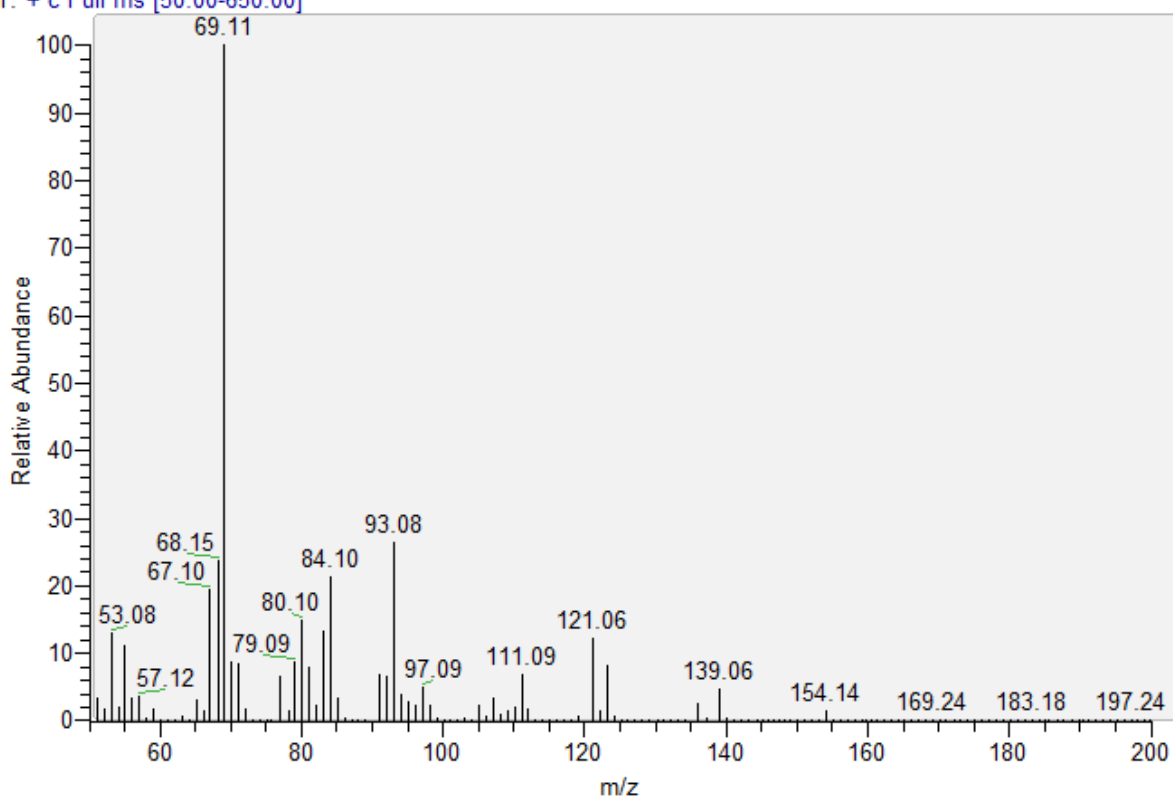

In 3070: ND



Geraniol:

Reference:

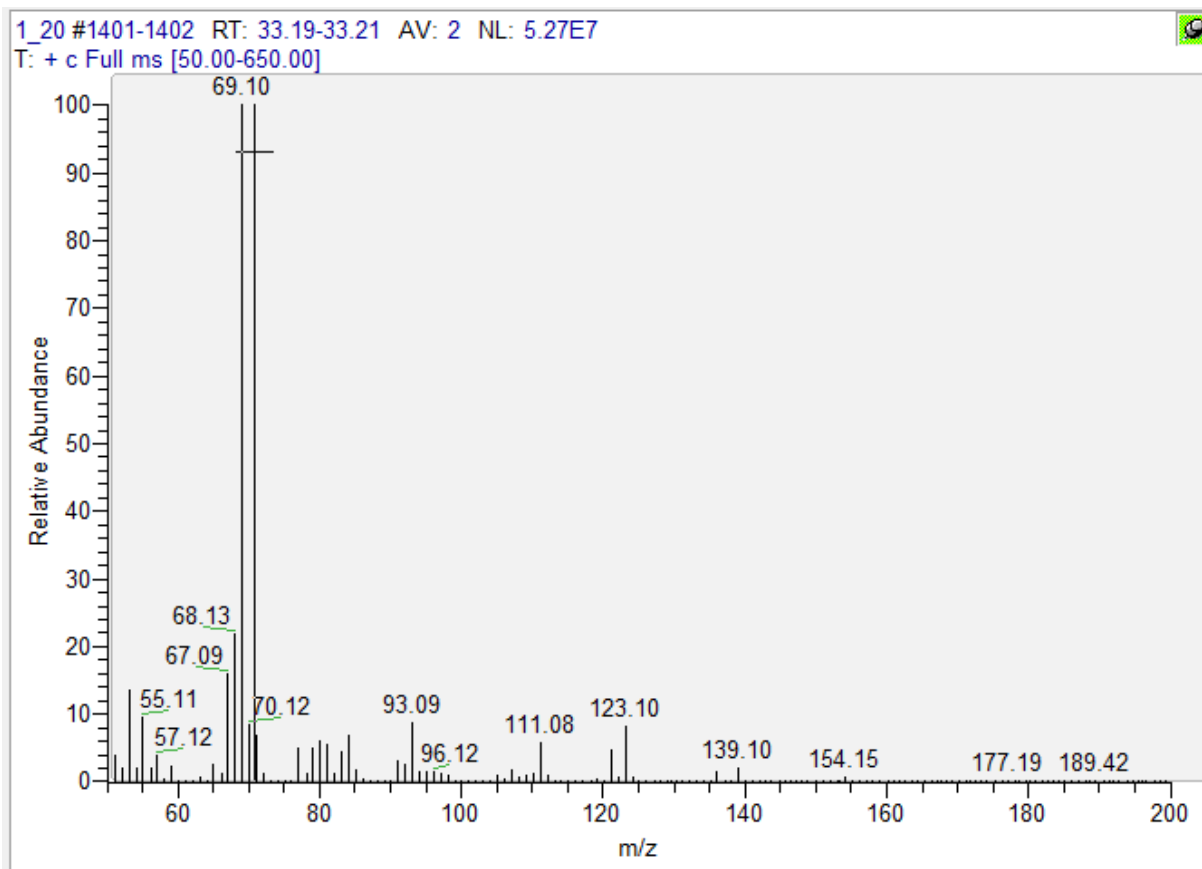

Samples:

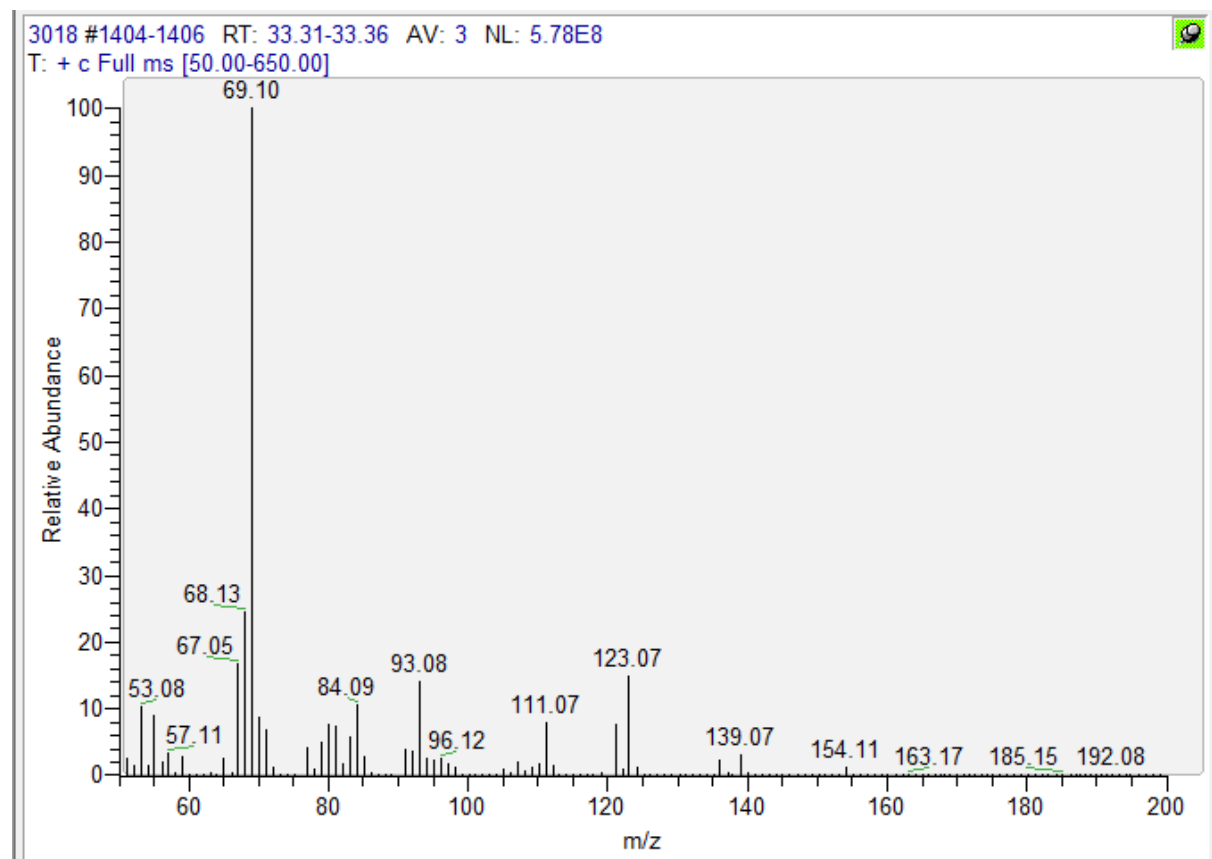

3053 #1396-1397 RT: 33.22-33.24 AV: 2 NL: 1.87E8

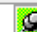

T: + c Full ms [50.00-650.00]

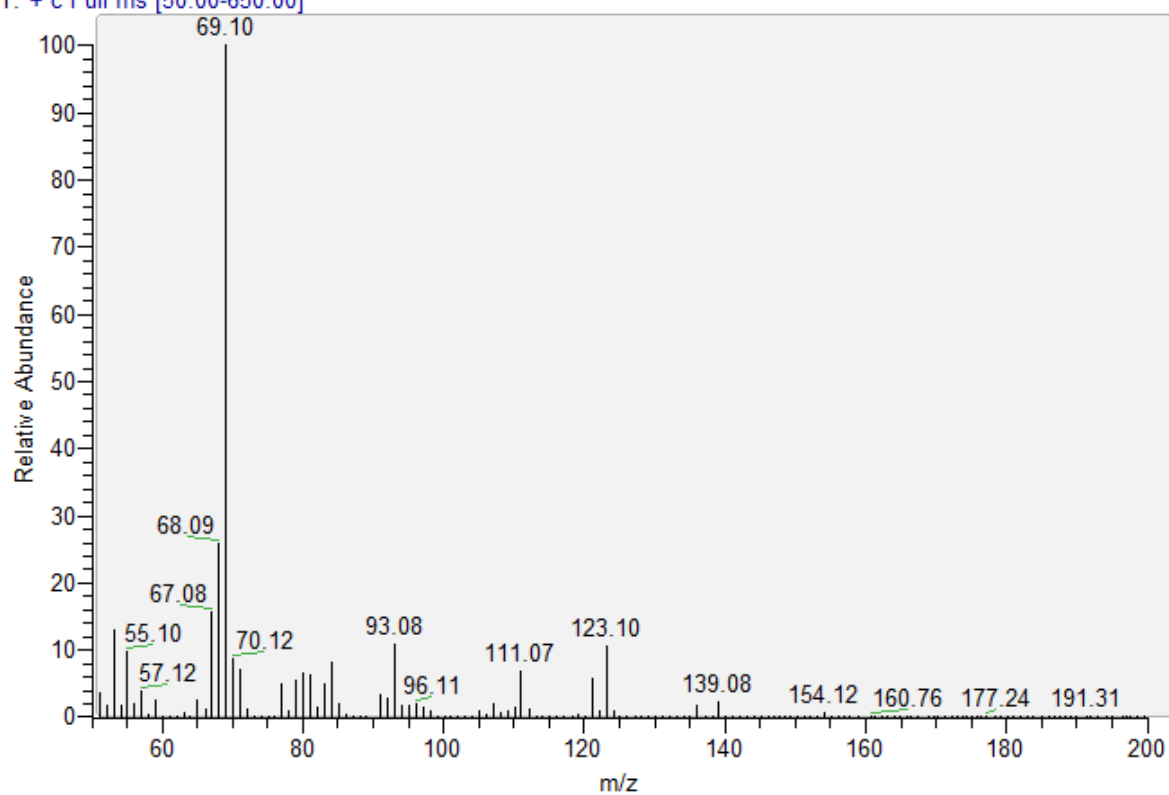

3058 #1396-1399 RT: 33.29-33.37 AV: 4 NL: 5.34E8

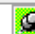

T: + c Full ms [50.00-650.00]

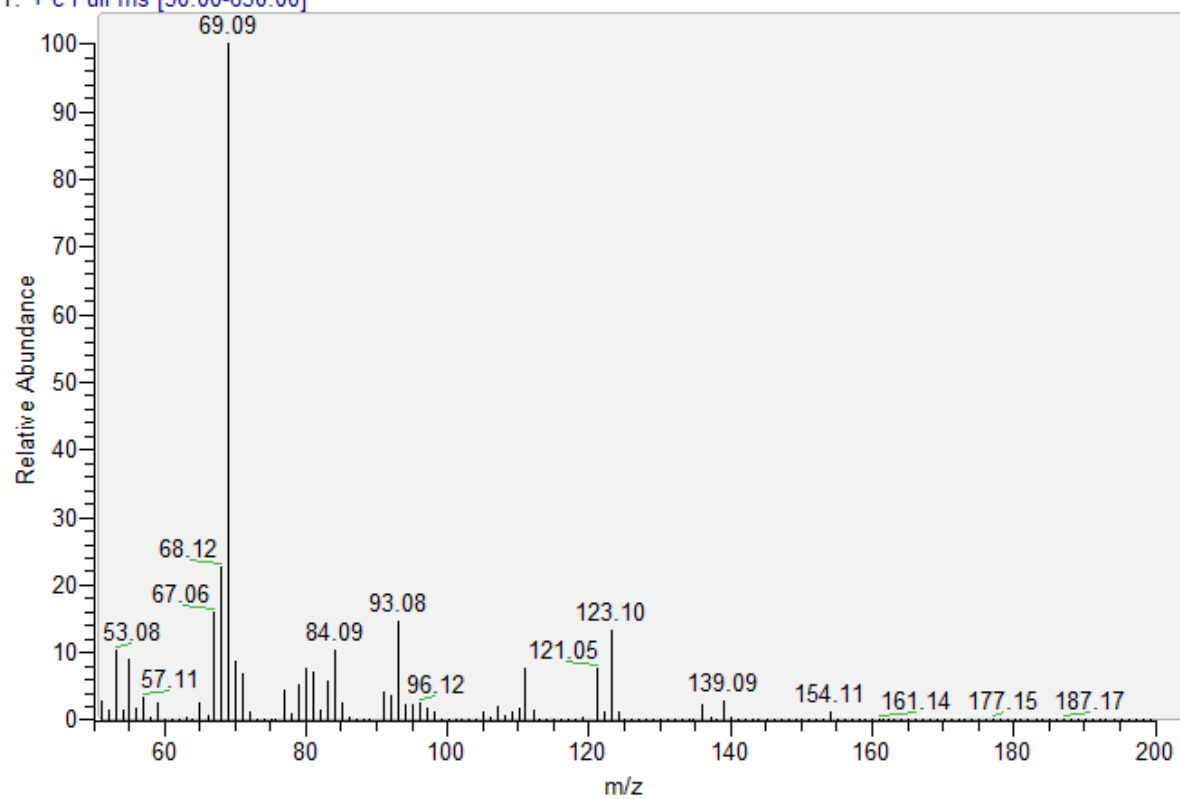

3057 #1403-1404 RT: 33.27-33.29 AV: 2 NL: 4.75E8  
T: + c Full ms [50.00-650.00]

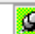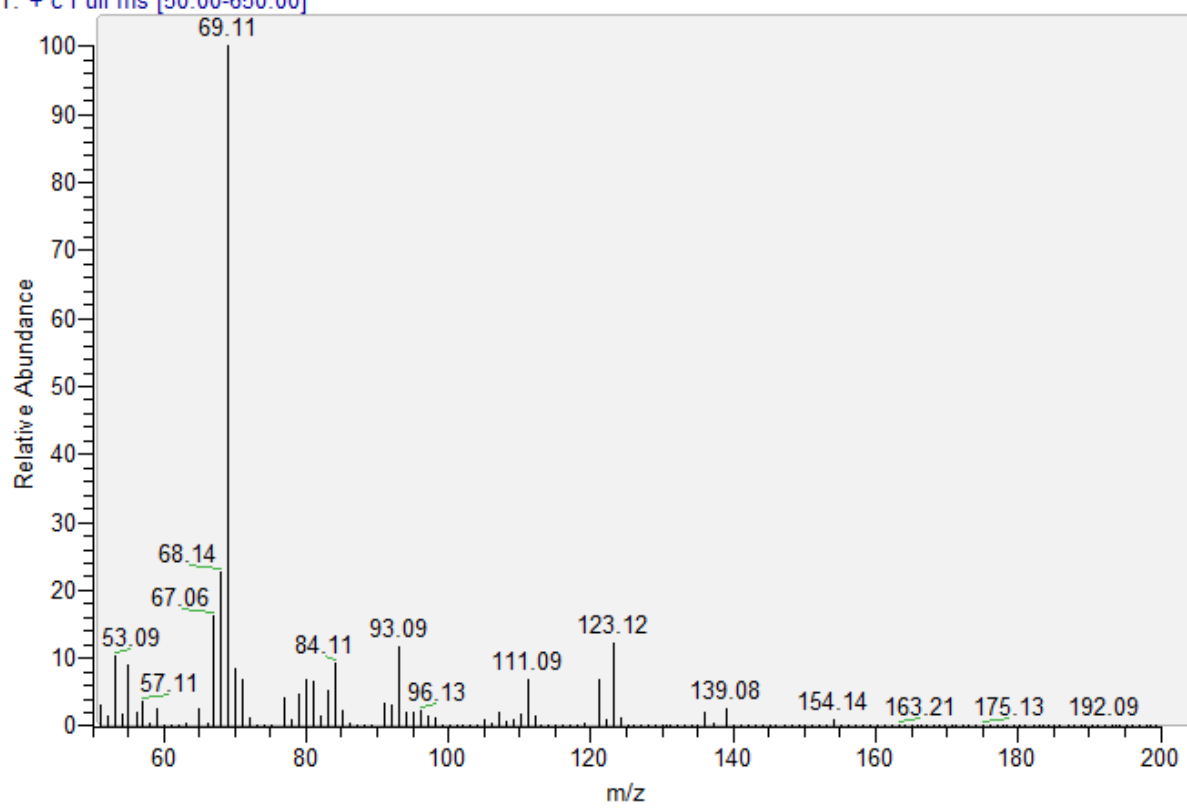

3021 #1400-1403 RT: 33.30-33.37 AV: 4 NL: 5.12E8

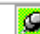

T: + c Full ms [50.00-650.00]

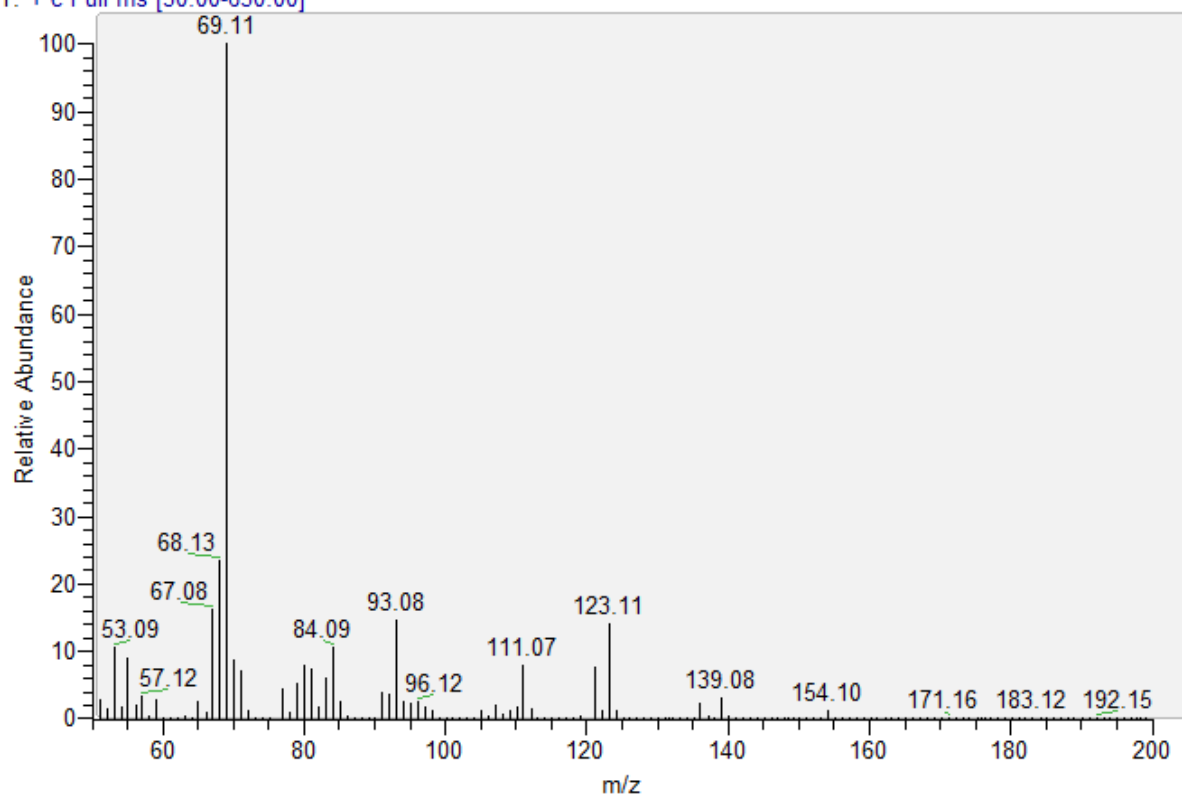

3075 #1396-1398 RT: 33.24-33.29 AV: 3 NL: 3.22E8  
T: + c Full ms [50.00-650.00]

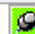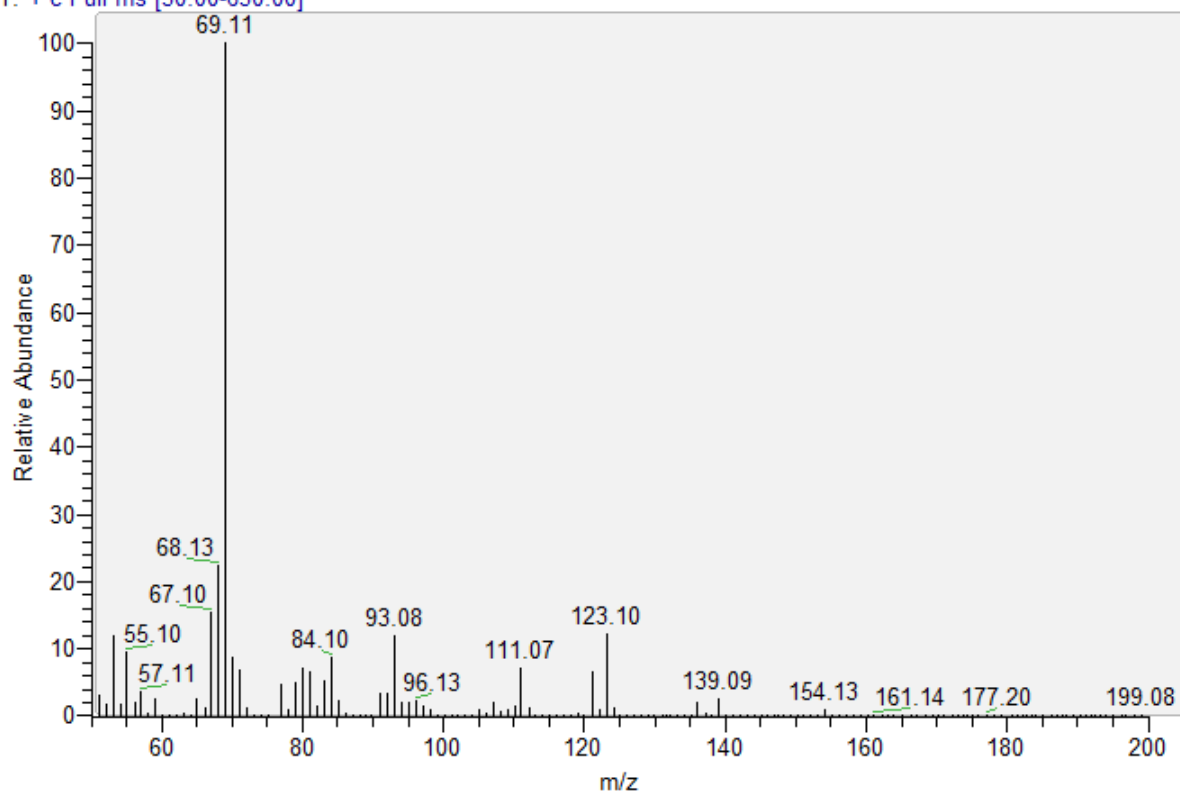

3074 #1400-1402 RT: 33.29-33.34 AV: 3 NL: 5.12E8  
T: + c Full ms [50.00-650.00]

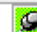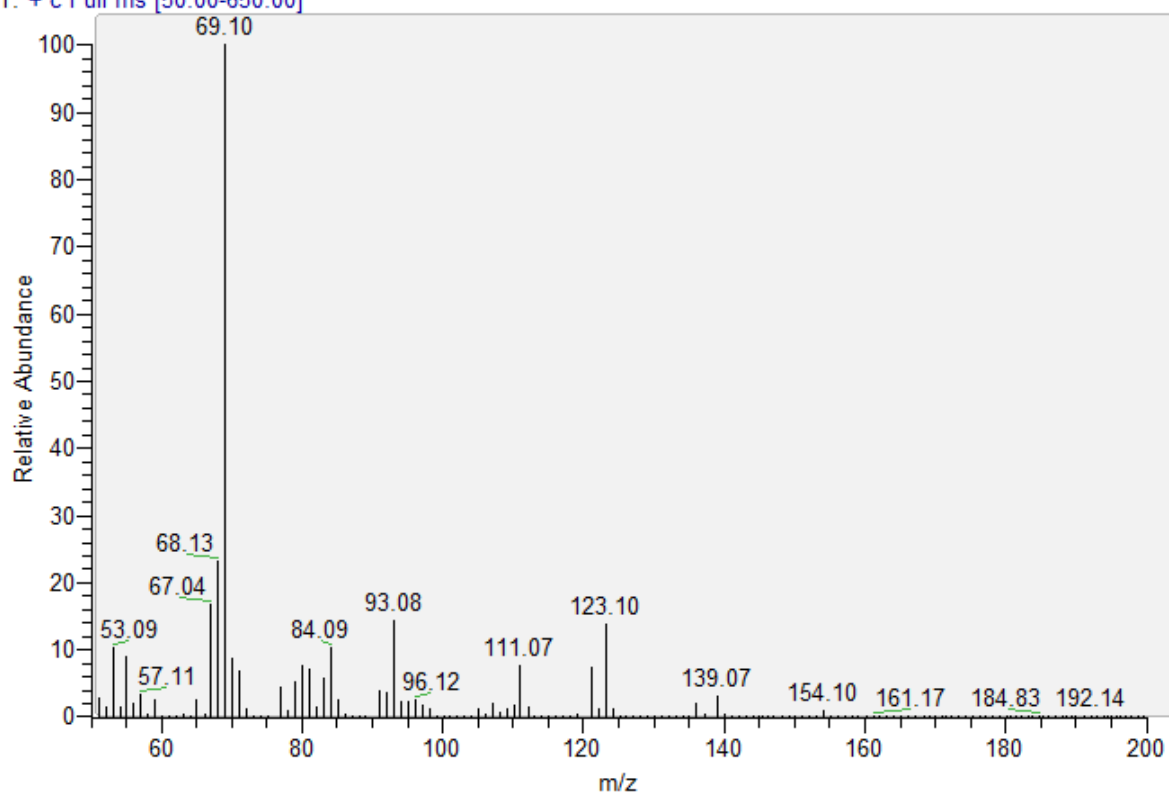



3073 #1398-1400 RT: 33.27-33.32 AV: 3 NL: 4.79E8  
T: + c Full ms [50.00-650.00]

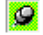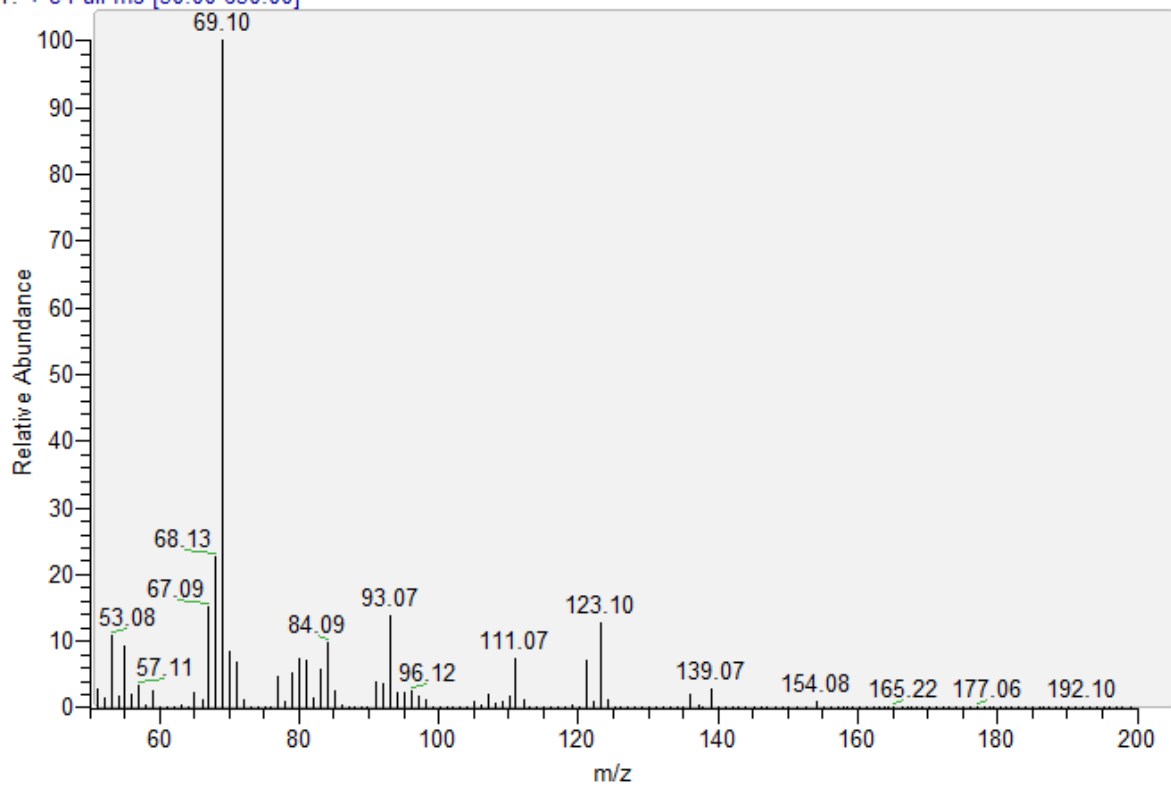

3073 #1398-1400 RT: 33.27-33.32 AV: 3 NL: 4.79E8  
T: + c Full ms [50.00-650.00]

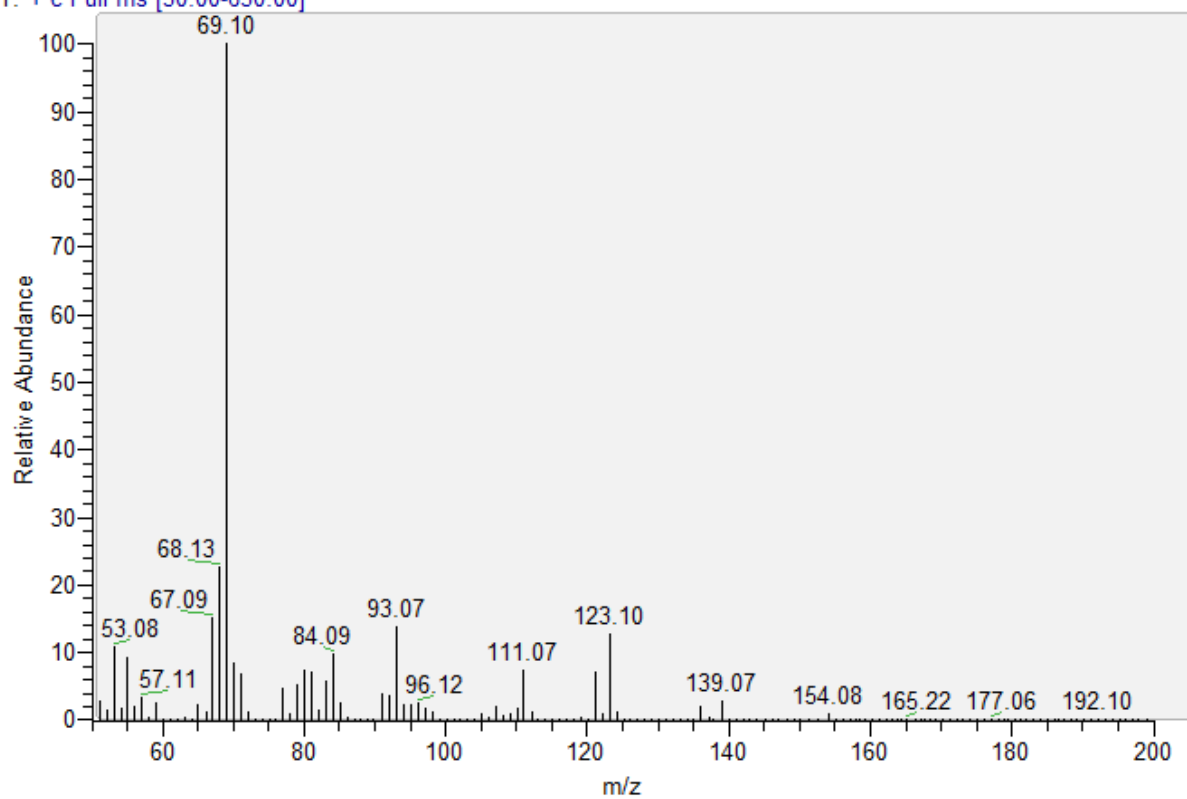

3072 #1398-1402 RT: 33.30-33.39 AV: 5 NL: 5.58E8

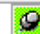

T: + c Full ms [50.00-650.00]

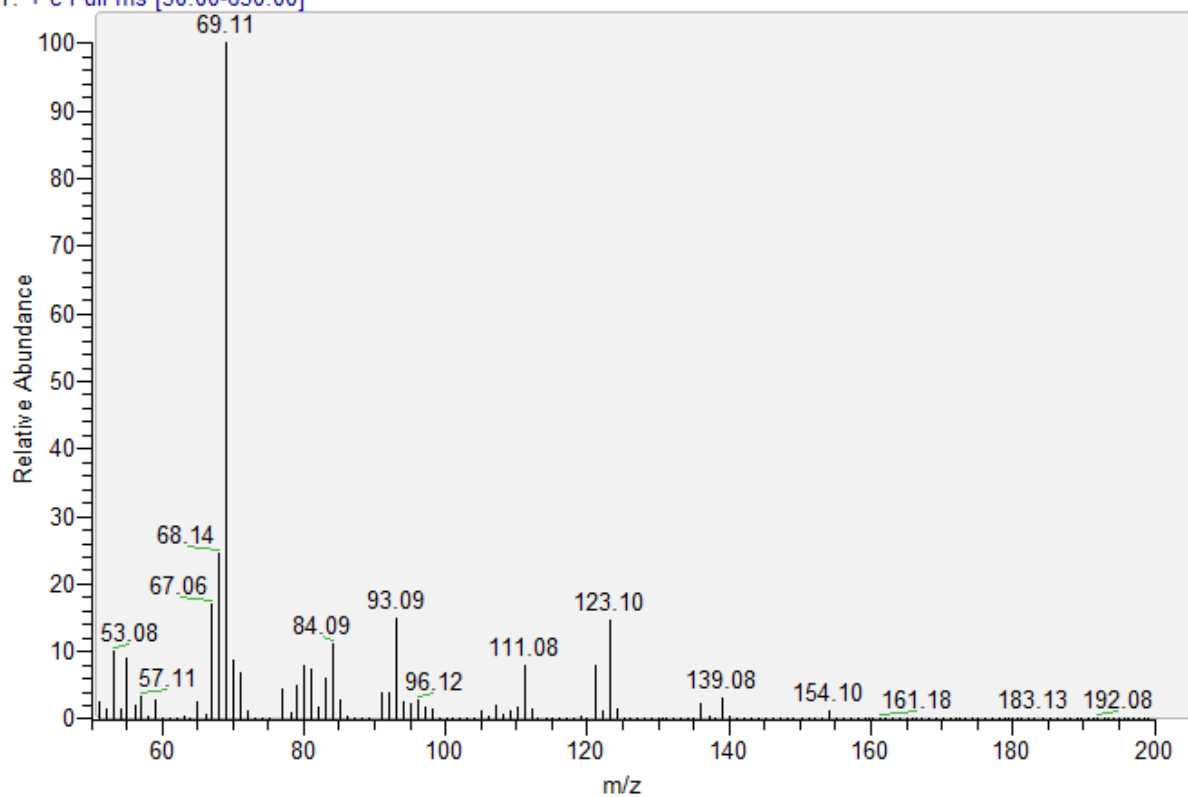

3070 #1397-1398 RT: 33.20-33.23 AV: 2 NL: 1.56E8  
T: + c Full ms [50.00-650.00]

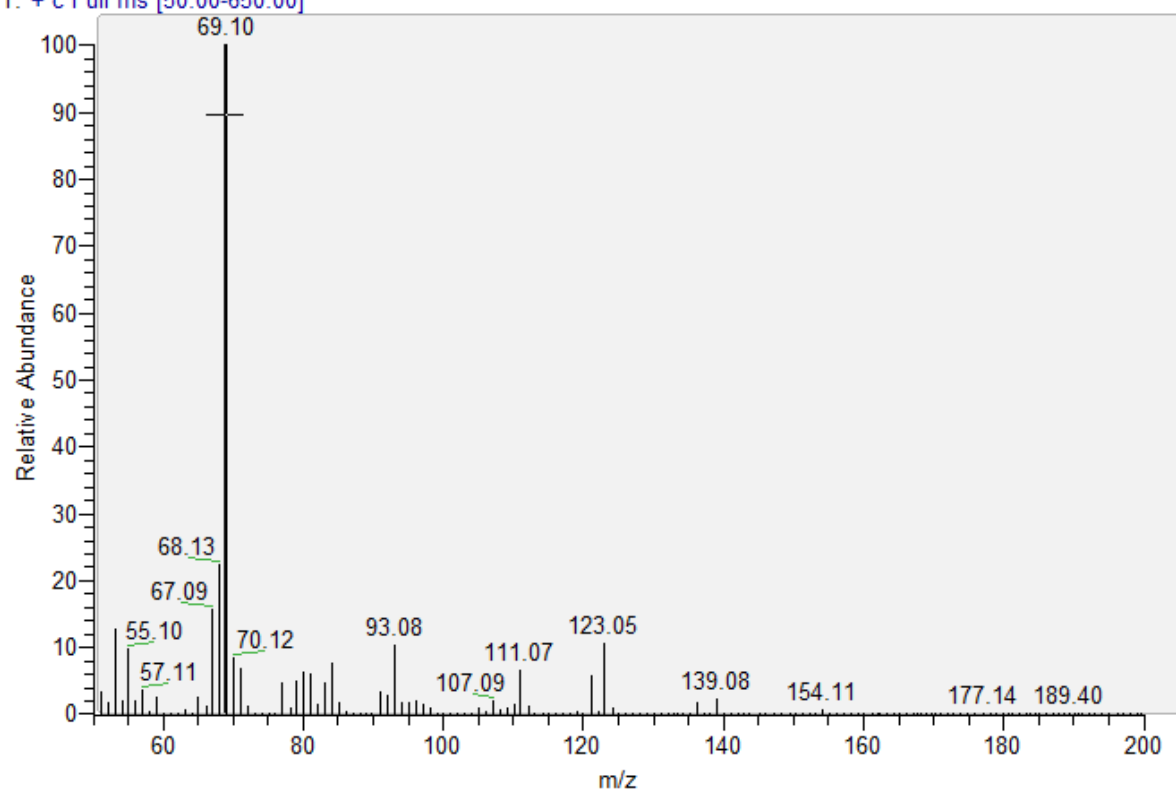

Methyleugenol

Reference:

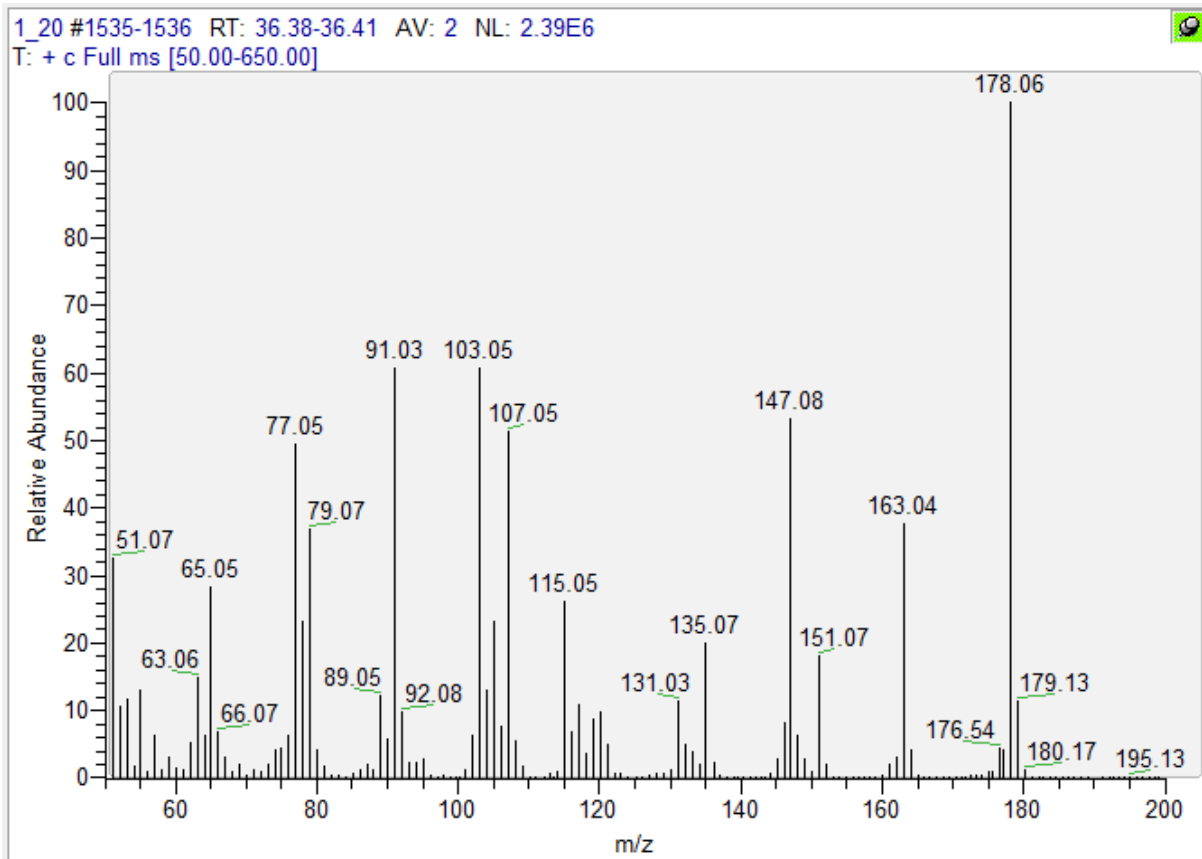

Samples:"

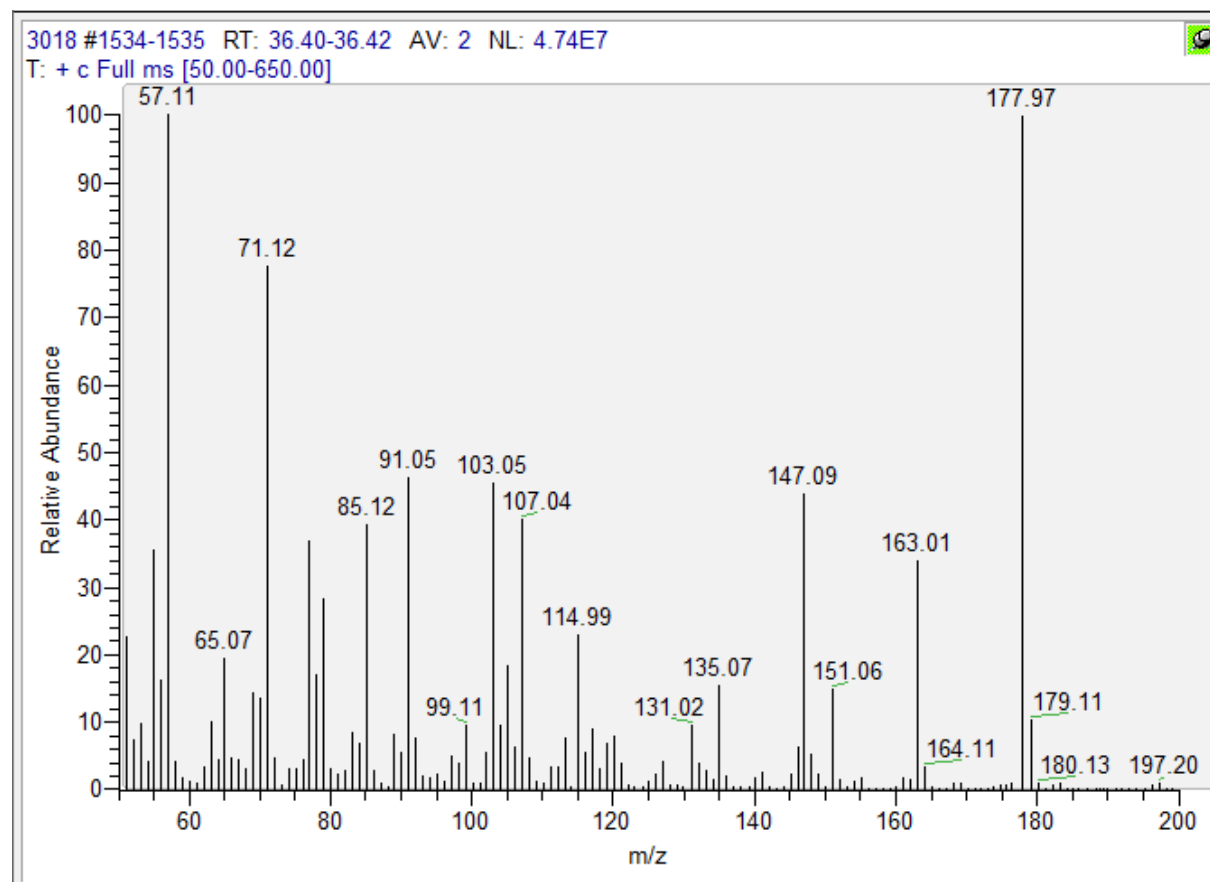

3053 #1529-1530 RT: 36.38-36.41 AV: 2 NL: 6.88E6  
T: + c Full ms [50.00-650.00]

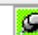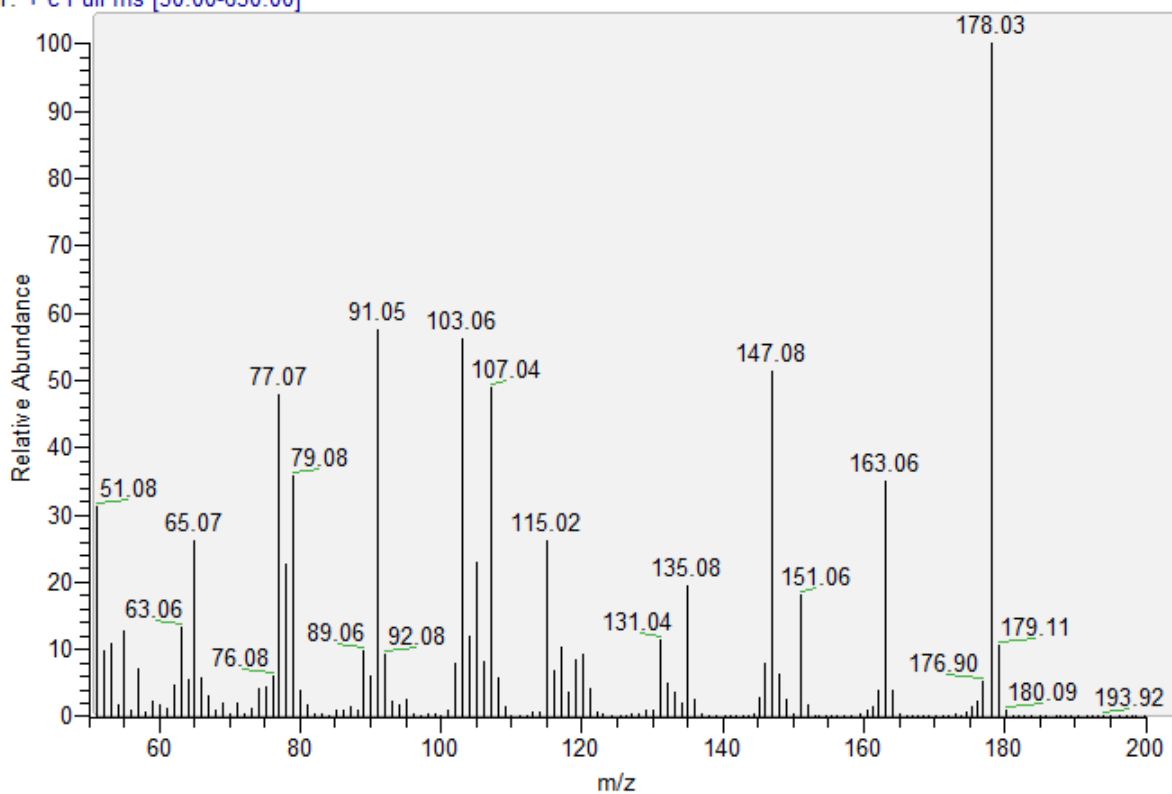

3058 #1524-1526 RT: 36.35-36.40 AV: 3 NL: 1.20E7  
T: + c Full ms [50.00-650.00]

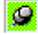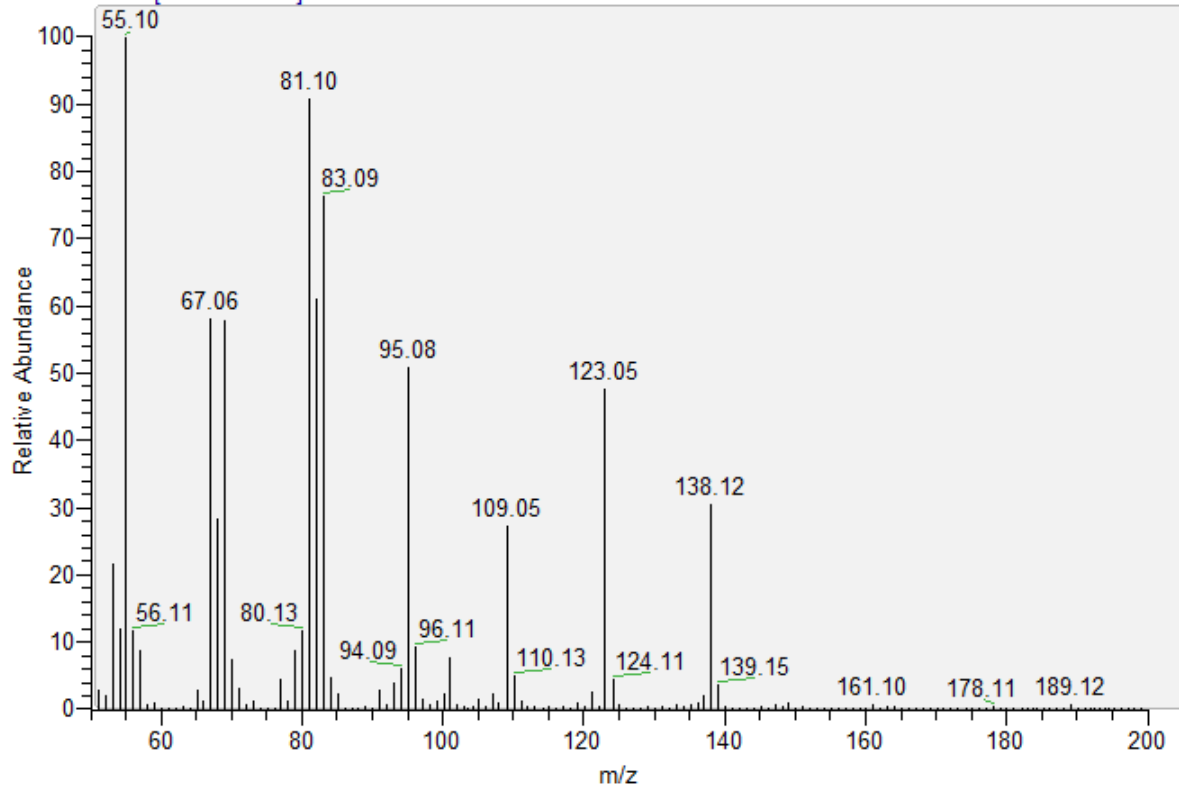



3057 #1532-1533 RT: 36.34-36.36 AV: 2 NL: 7.53E6  
T: + c Full ms [50.00-650.00]

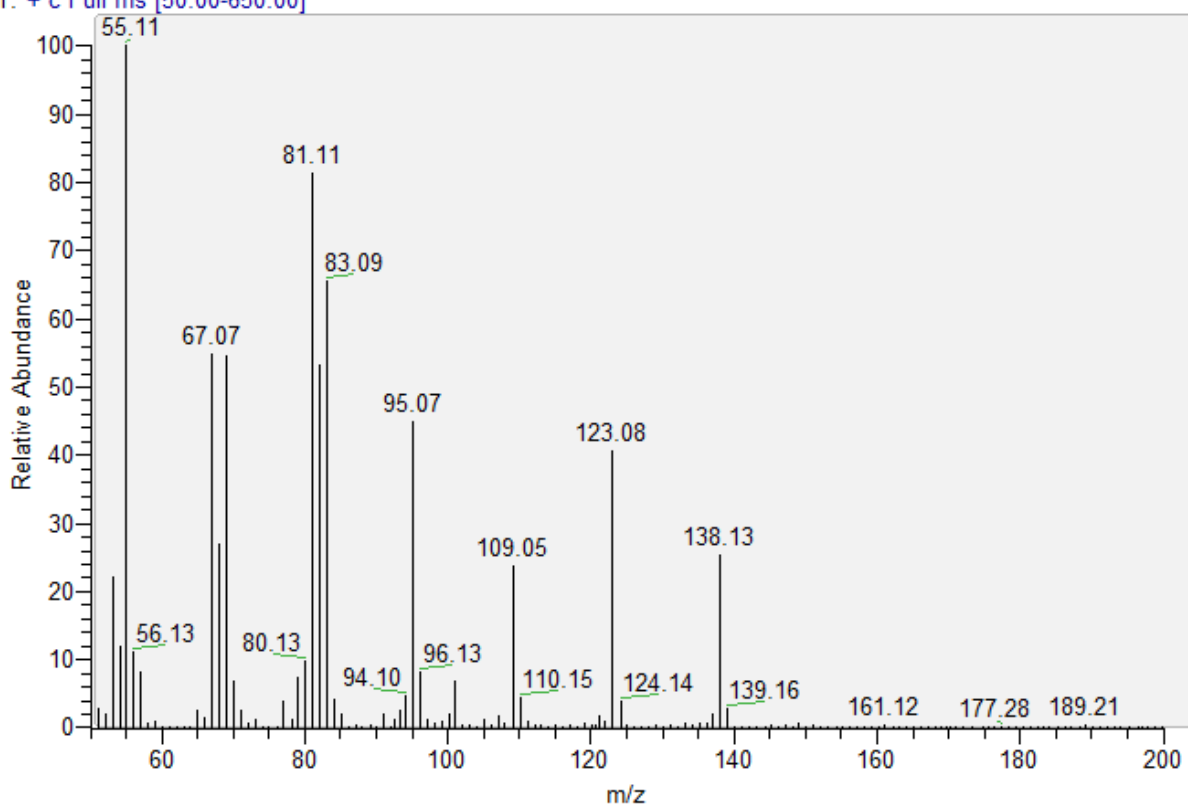

3021 #1531-1532 RT: 36.42-36.44 AV: 2 NL: 1.17E8  
T: + c Full ms [50.00-650.00]

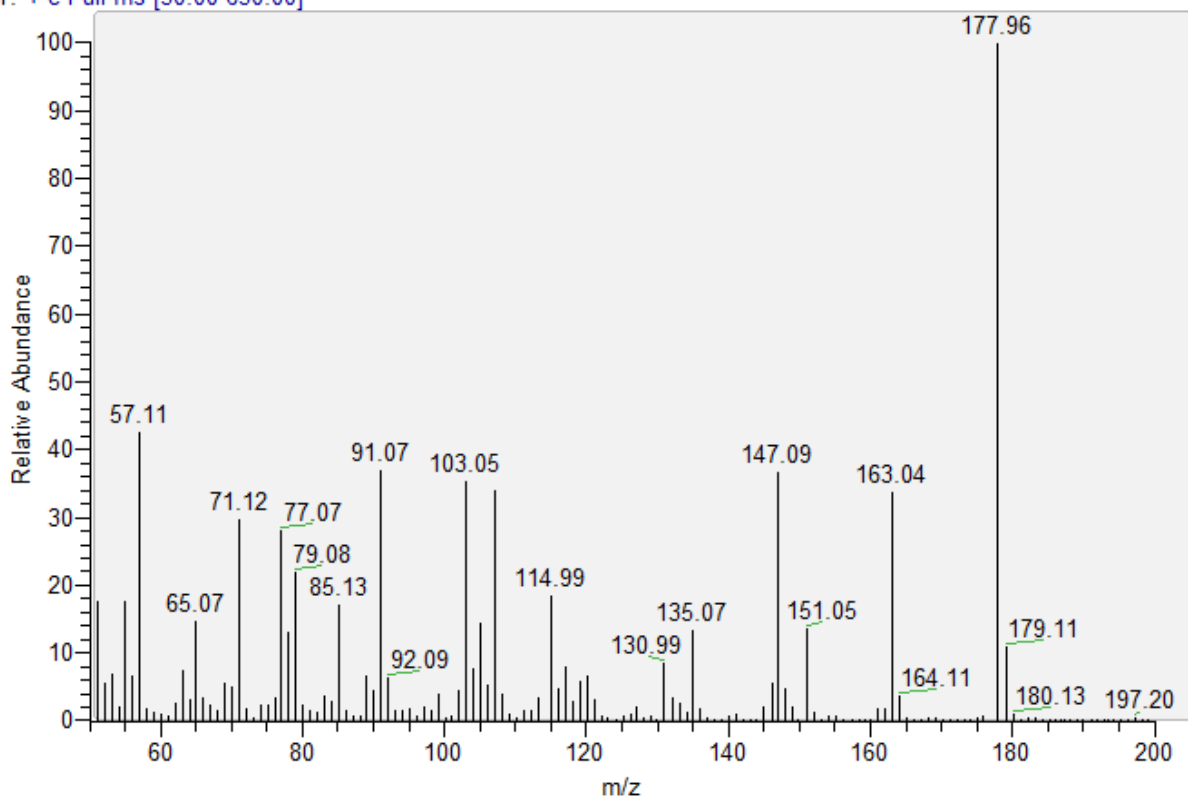

3075 #1529-1530 RT: 36.41-36.44 AV: 2 NL: 7.16E7  
T: + c Full ms [50.00-650.00]

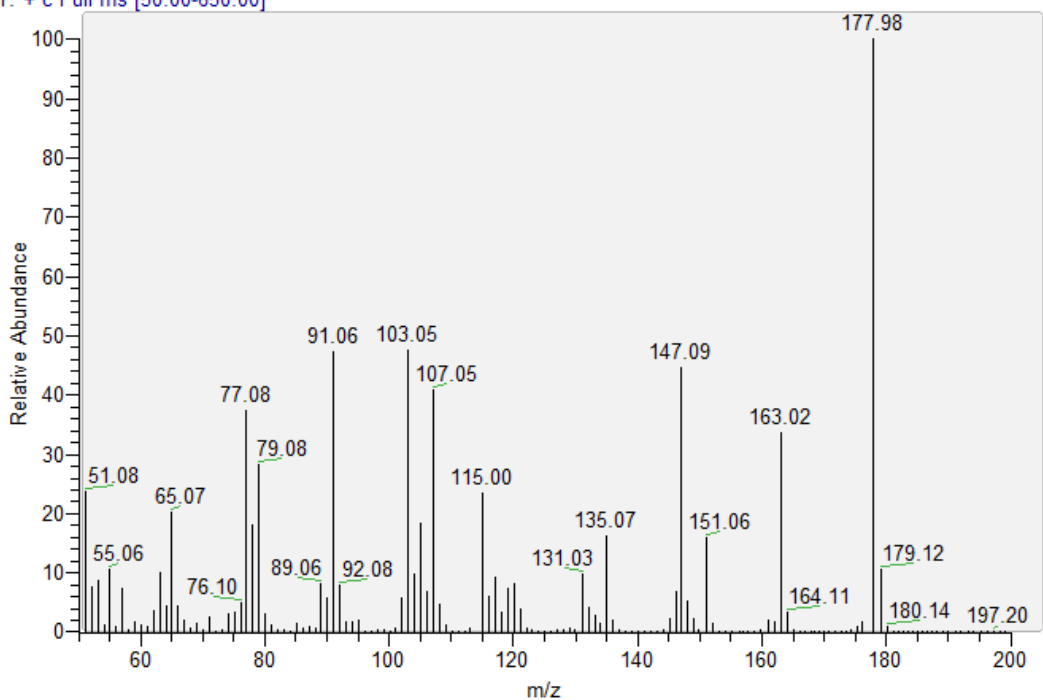

3074 #1530-1531 RT: 36.40-36.42 AV: 2 NL: 6.84E7  
T: + c Full ms [50.00-650.00]

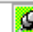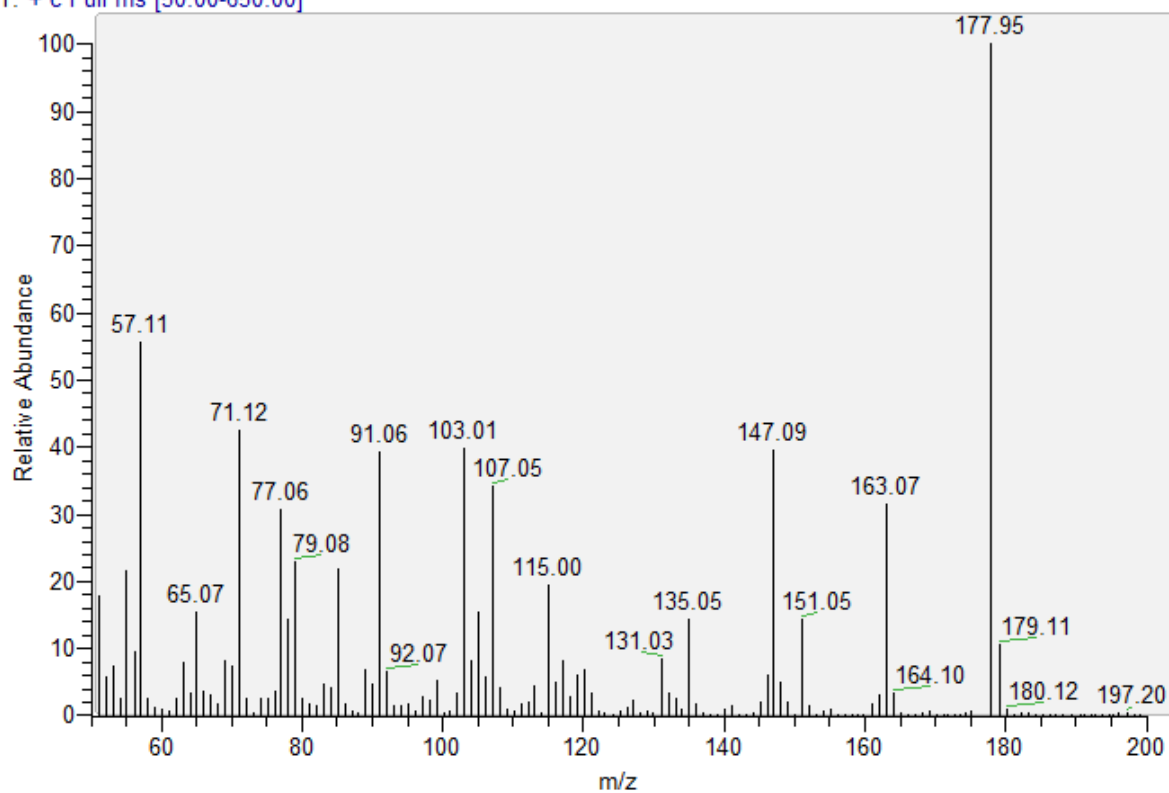

3073 #1529-1530 RT: 36.39-36.42 AV: 2 NL: 4.70E7  
T: + c Full ms [50.00-650.00]

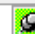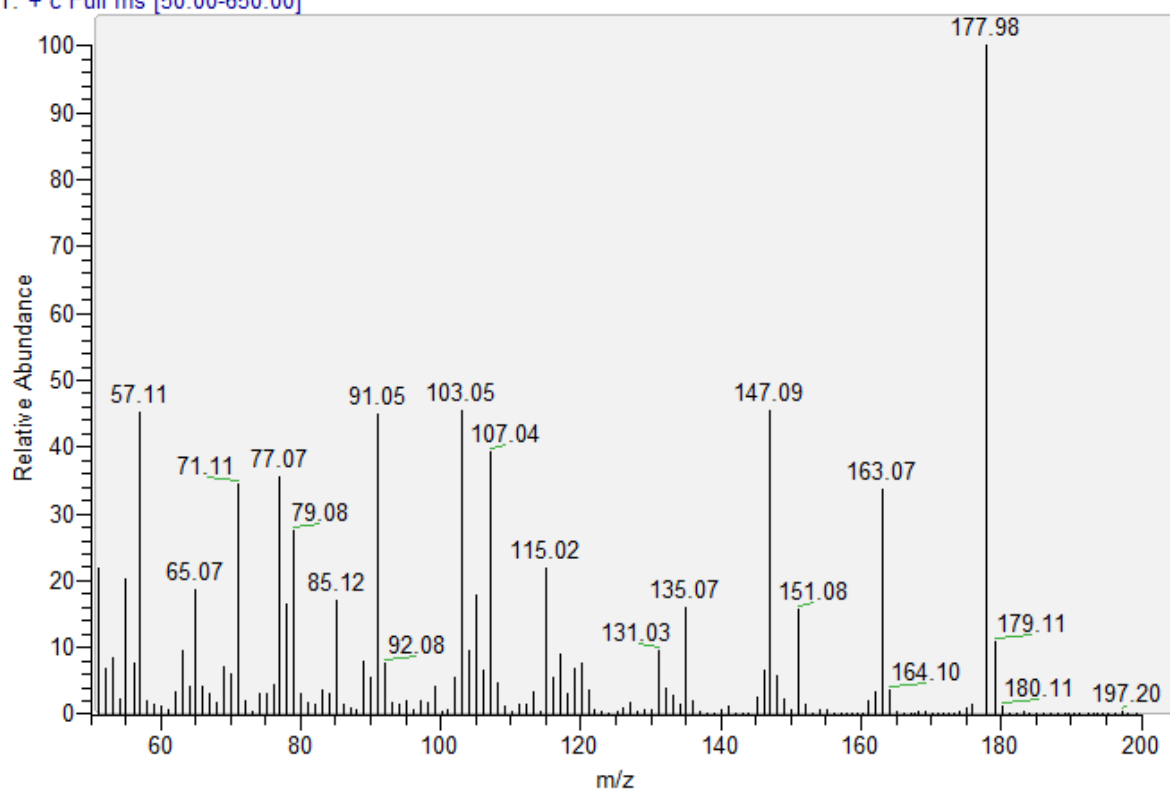

3073 #1529-1530 RT: 36.39-36.42 AV: 2 NL: 4.70E7  
T: + c Full ms [50.00-650.00]

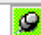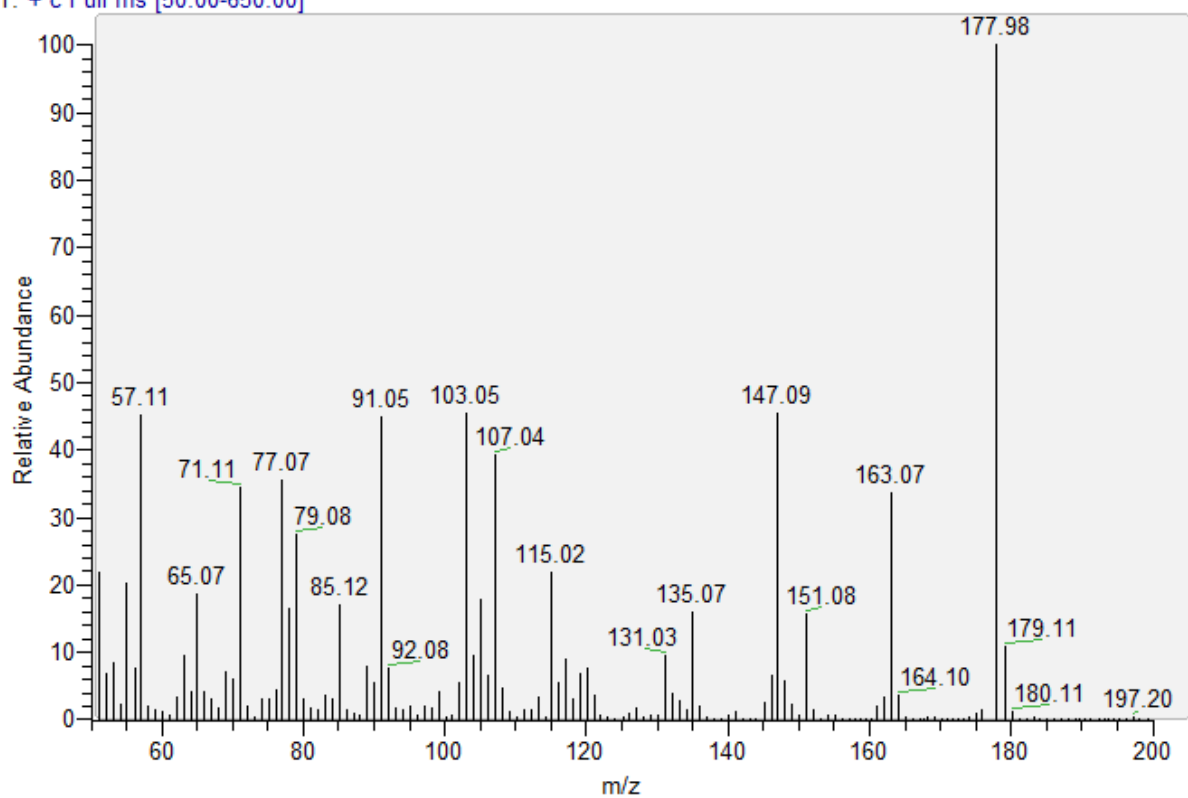

3072 #1527-1529 RT: 36.37-36.42 AV: 3 NL: 2.19E7  
T: + c Full ms [50.00-650.00]

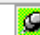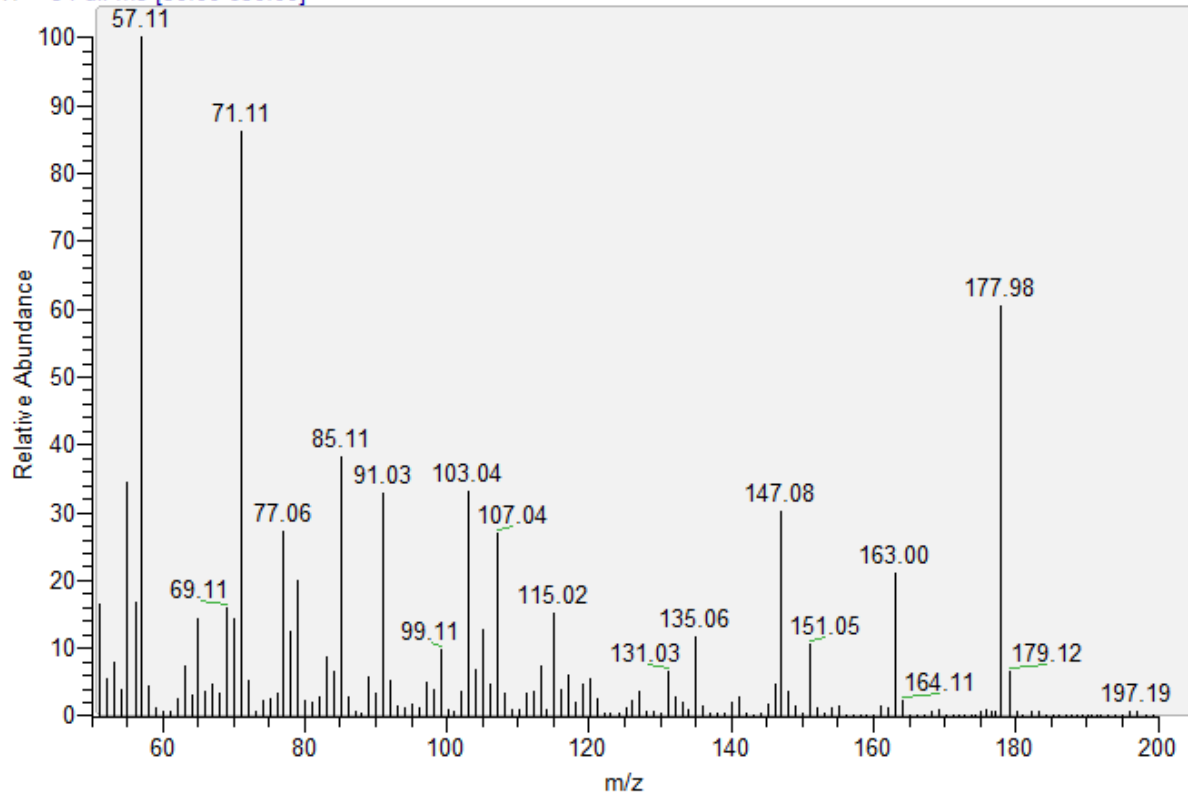

3070 #1530-1531 RT: 36.37-36.40 AV: 2 NL: 1.42E6  
T: + c Full ms [50.00-650.00]

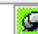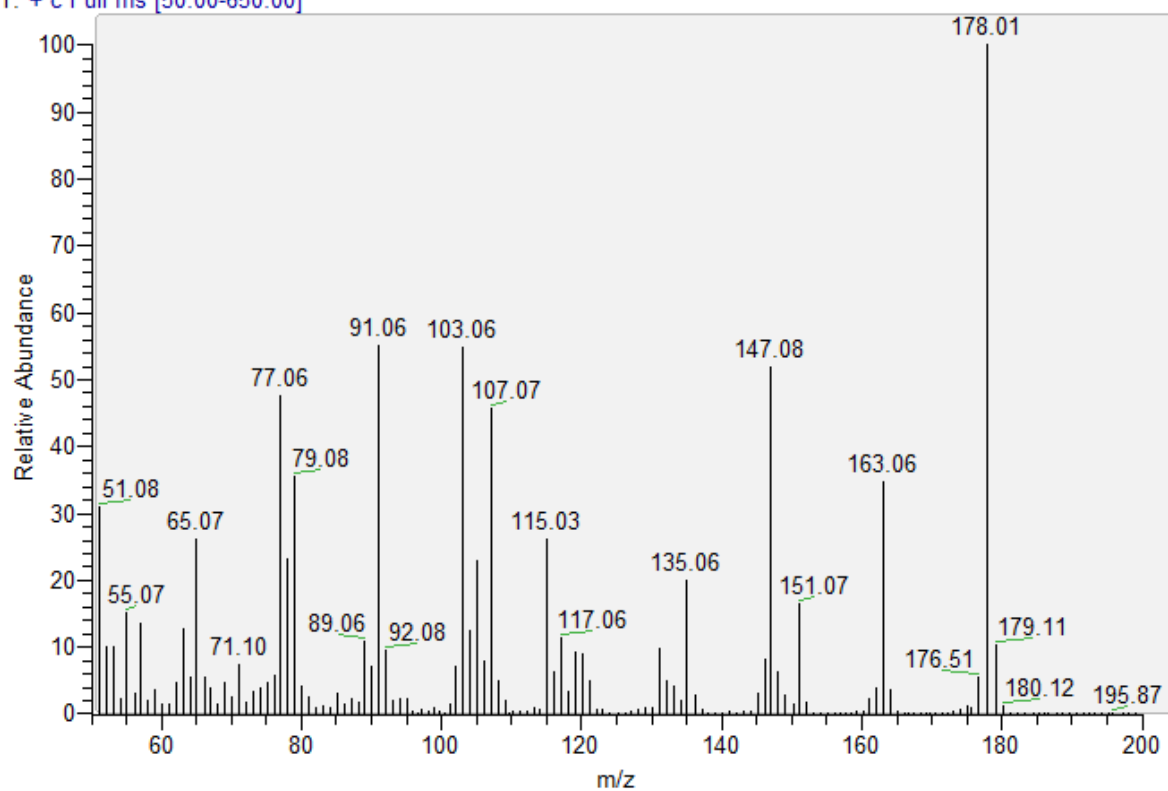

Eugenol

Reference:

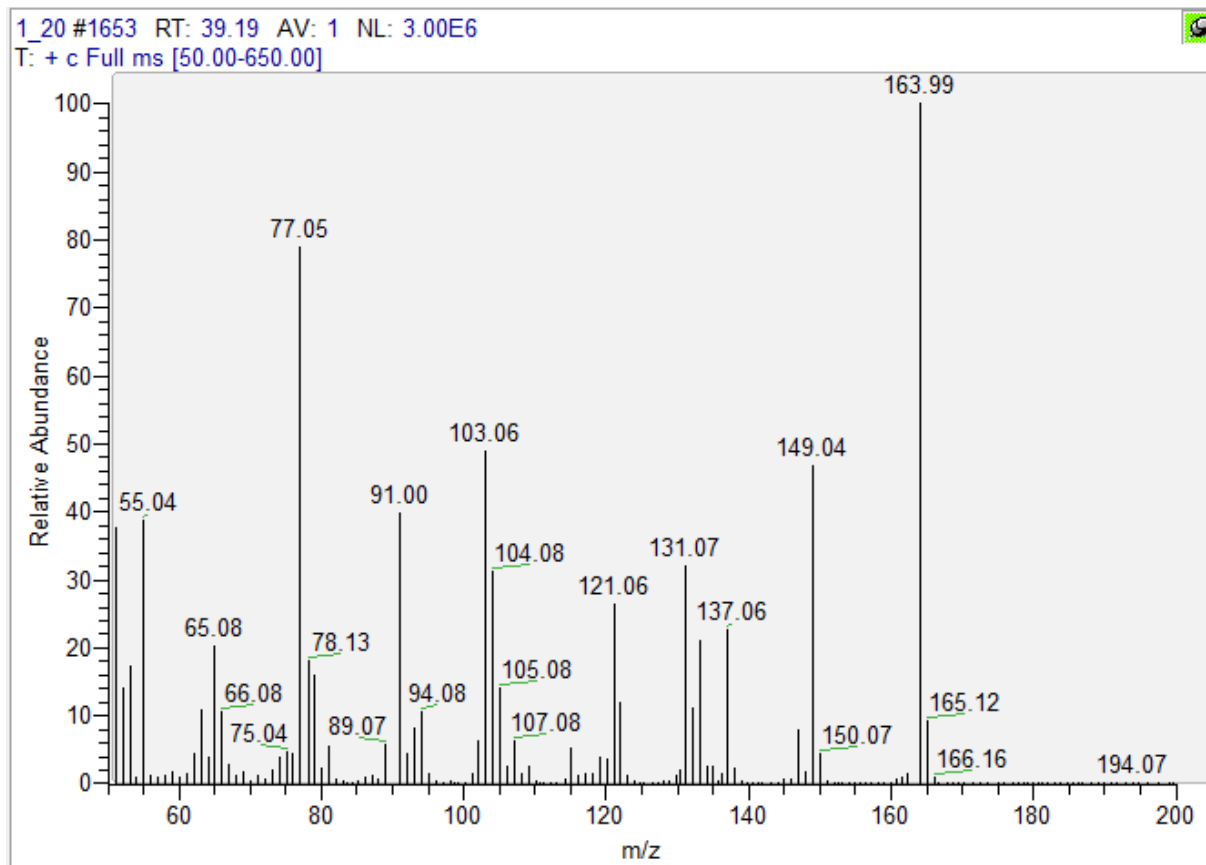



Samples:

3021 #1656 RT: 39.40 AV: 1 NL: 9.07E5

T: + c Full ms [50.00-650.00]

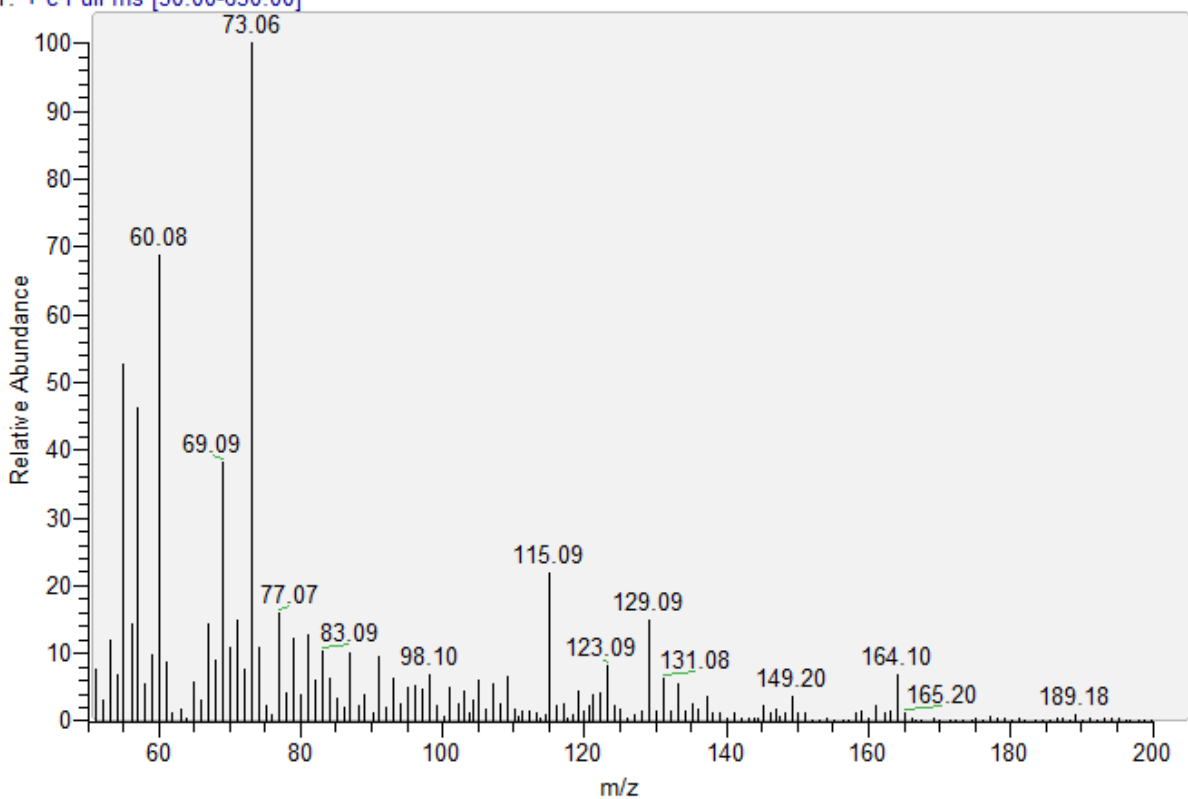

3053 #1647-1648 RT: 39.19-39.22 AV: 2 NL: 1.43E6  
T: + c Full ms [50.00-650.00]

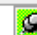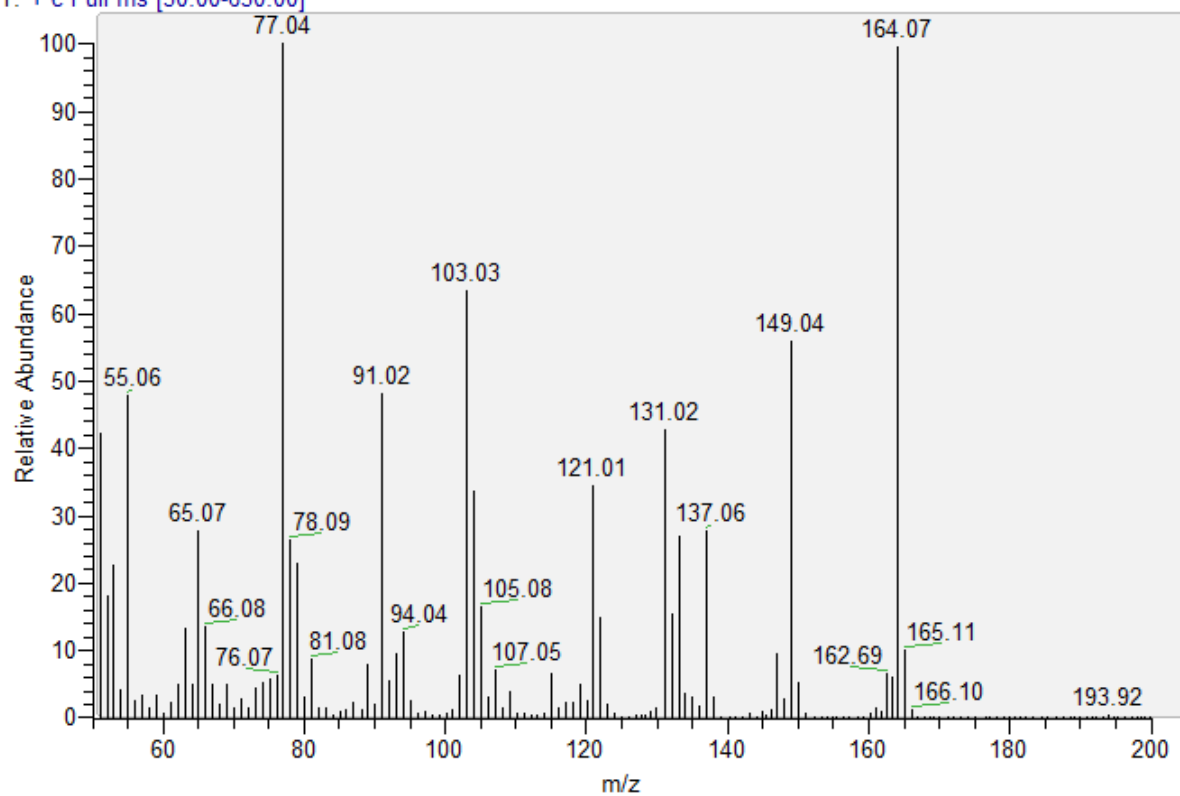

3058 #1644-1645 RT: 39.21-39.24 AV: 2 NL: 1.02E6

T: + c Full ms [50.00-650.00]

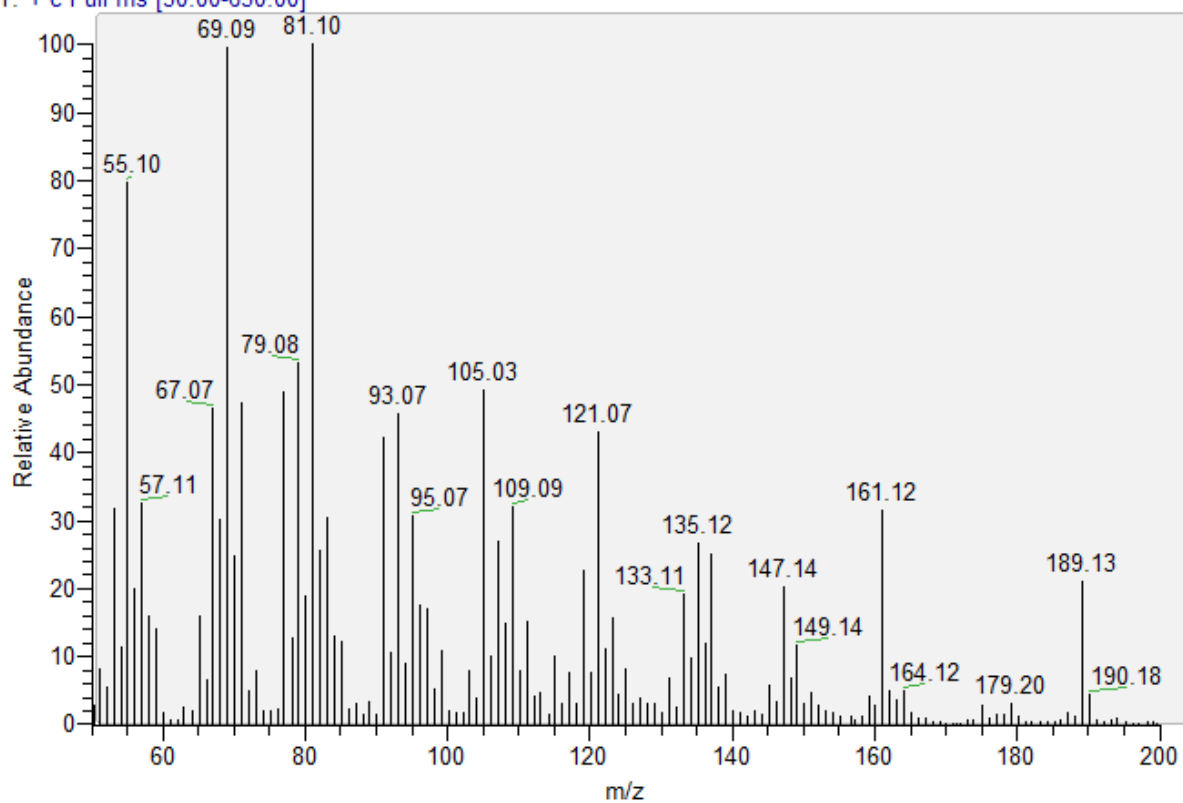

3057 #1655-1657 RT: 39.27-39.32 AV: 3 NL: 8.94E5  
T: + c Full ms [50.00-650.00]

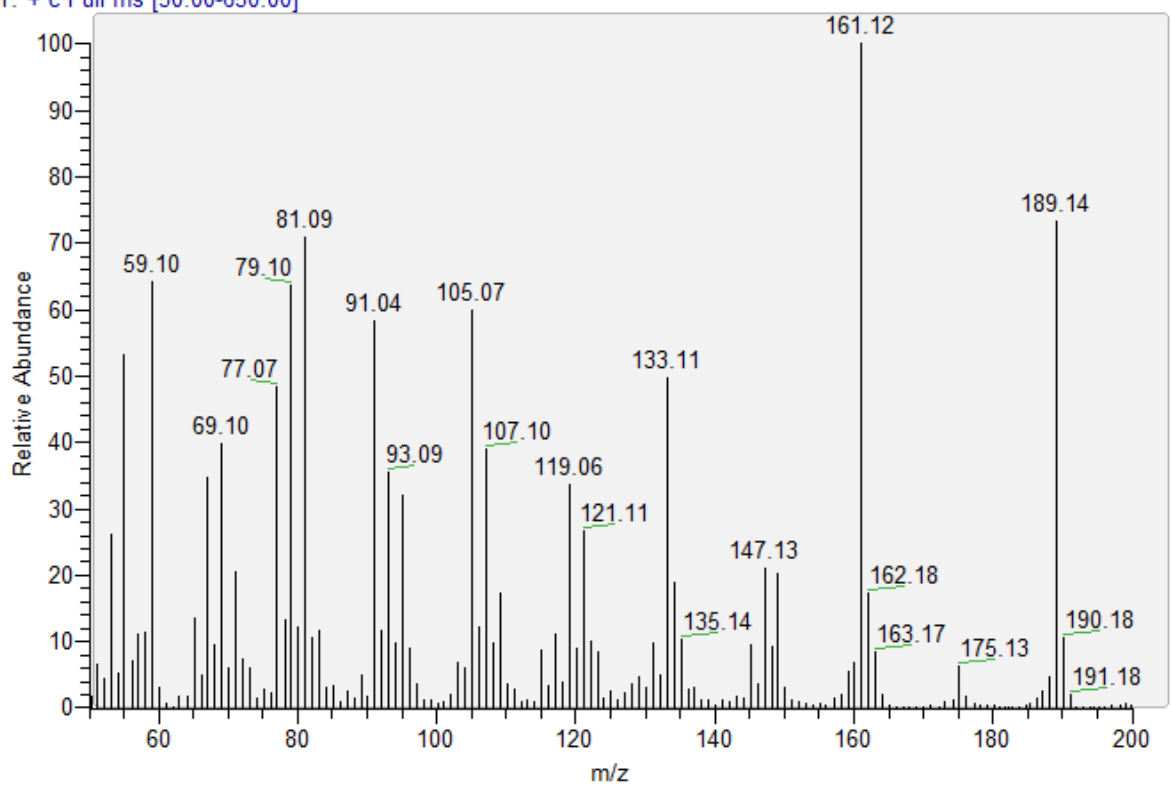

3057 #1652 RT: 39.20 AV: 1 NL: 4.50E5

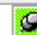

T: + c Full ms [50.00-650.00]

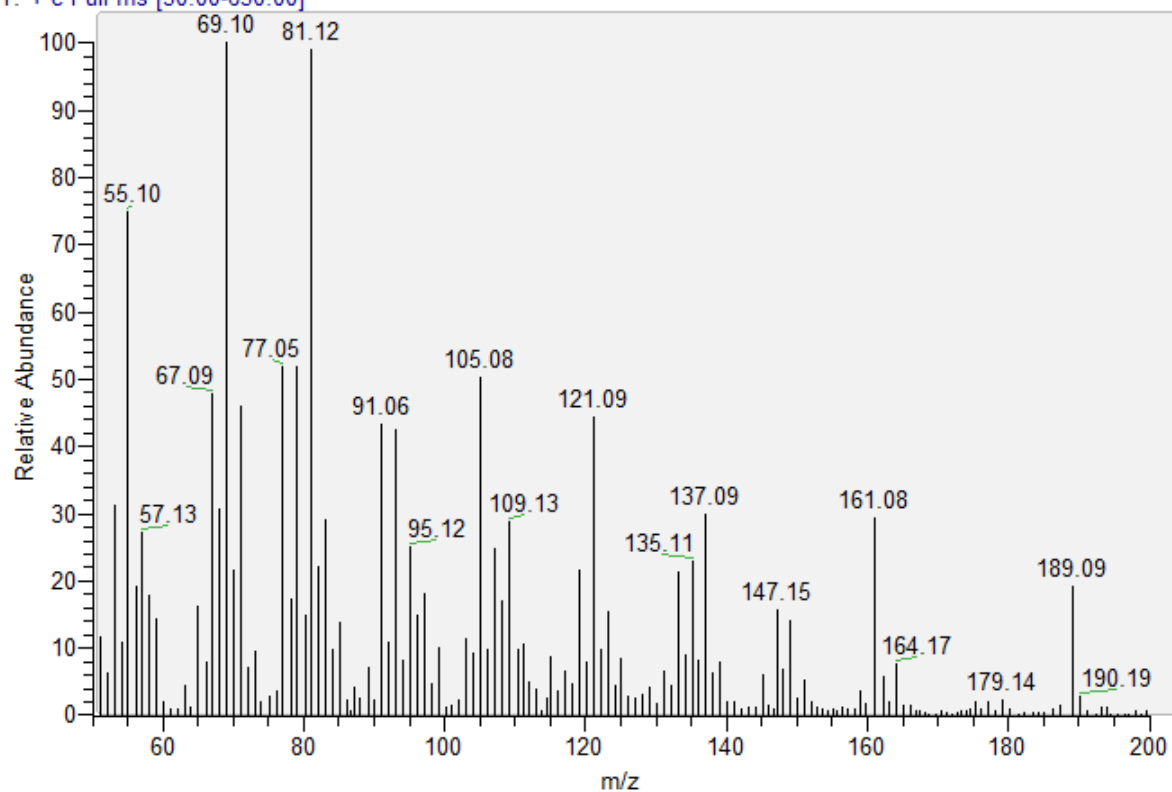

3021 #1647-1648 RT: 39.18-39.20 AV: 2 NL: 3.85E7  
T: + c Full ms [50.00-650.00]

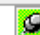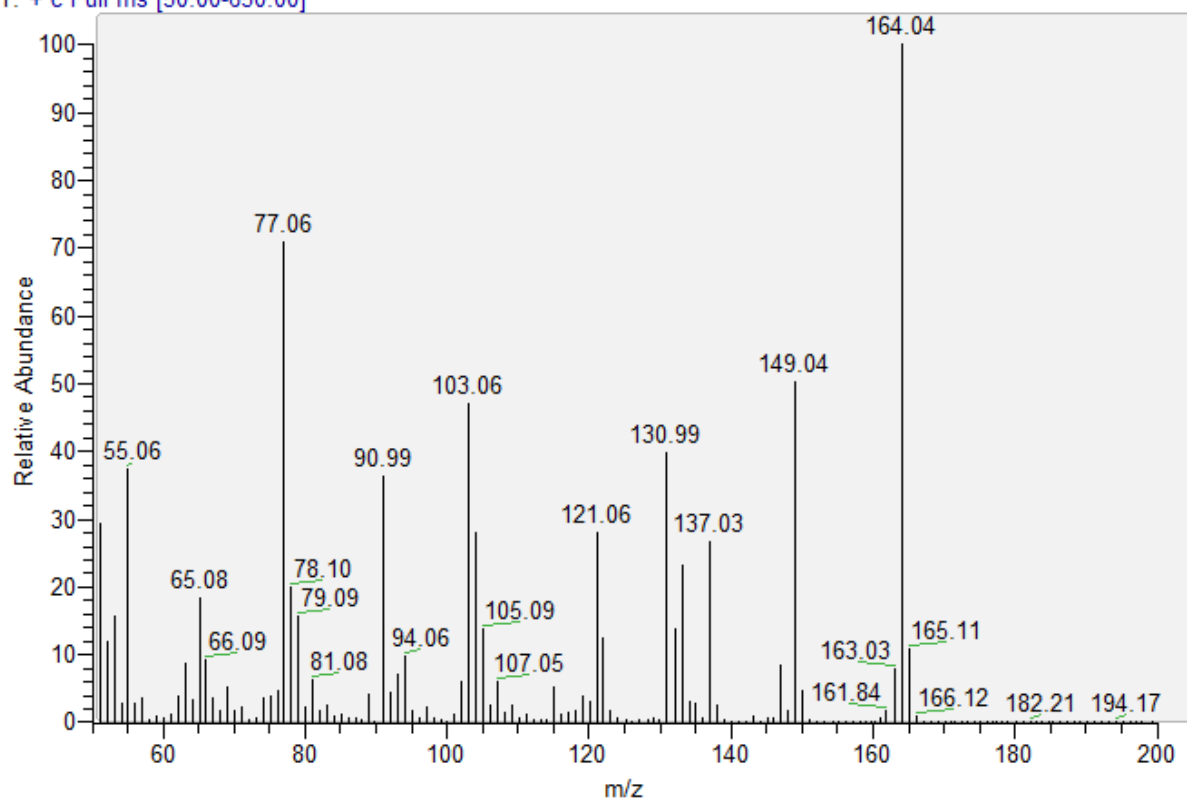

3075 #1646 RT: 39.20 AV: 1 NL: 3.11E7  
T: + c Full ms [50.00-650.00]

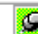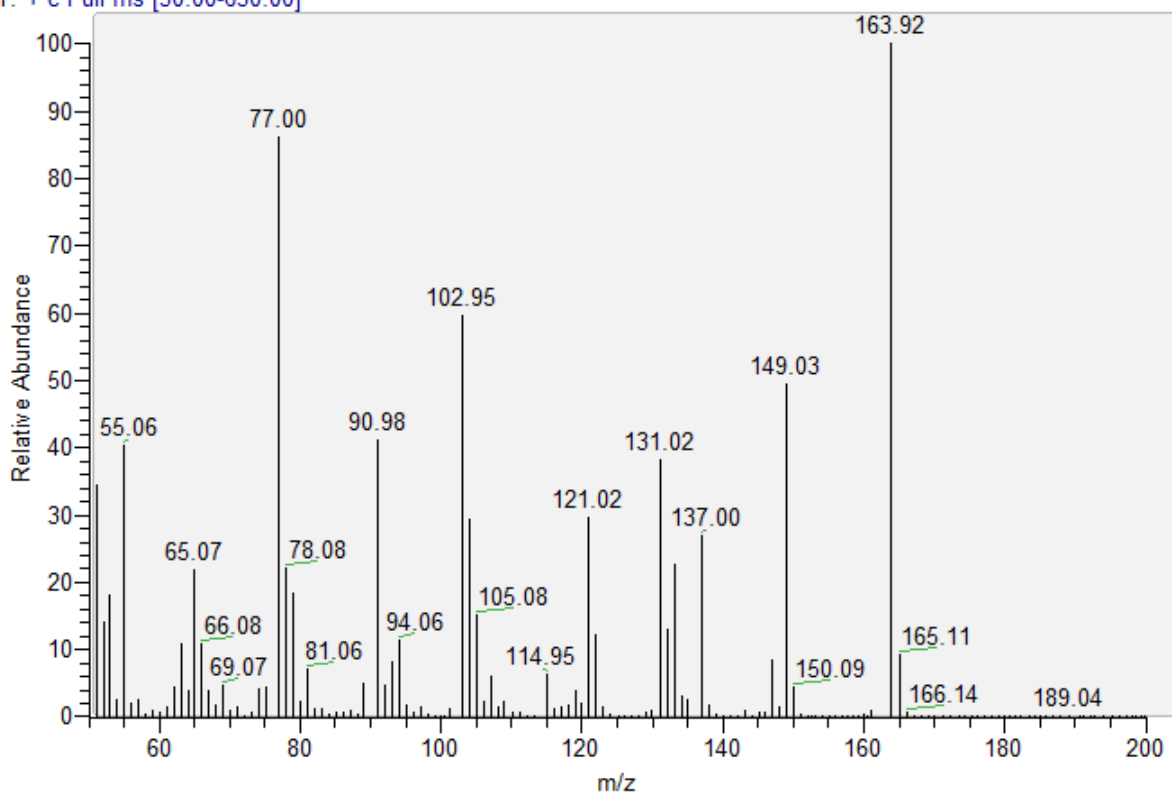

3074 #1647-1648 RT: 39.19-39.21 AV: 2 NL: 4.03E7  
T: + c Full ms [50.00-650.00]

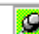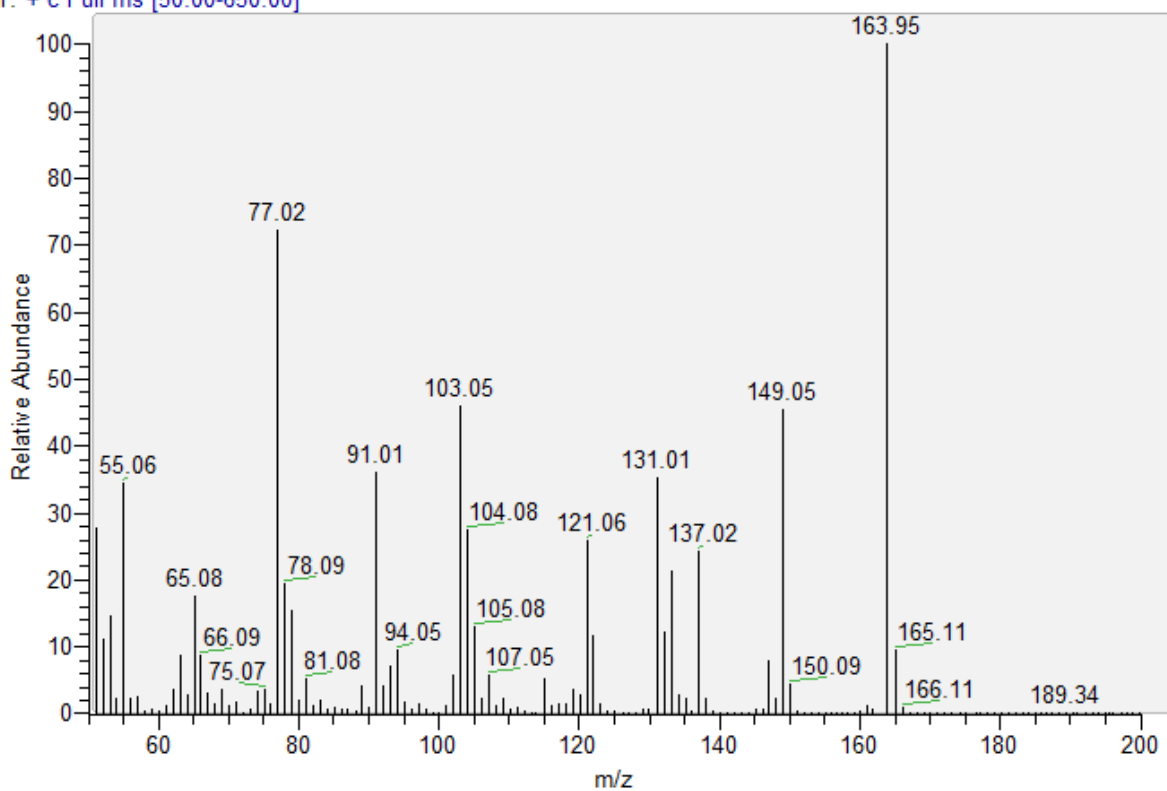



3073 #1647 RT: 39.20 AV: 1 NL: 8.39E6  
T: + c Full ms [50.00-650.00]

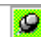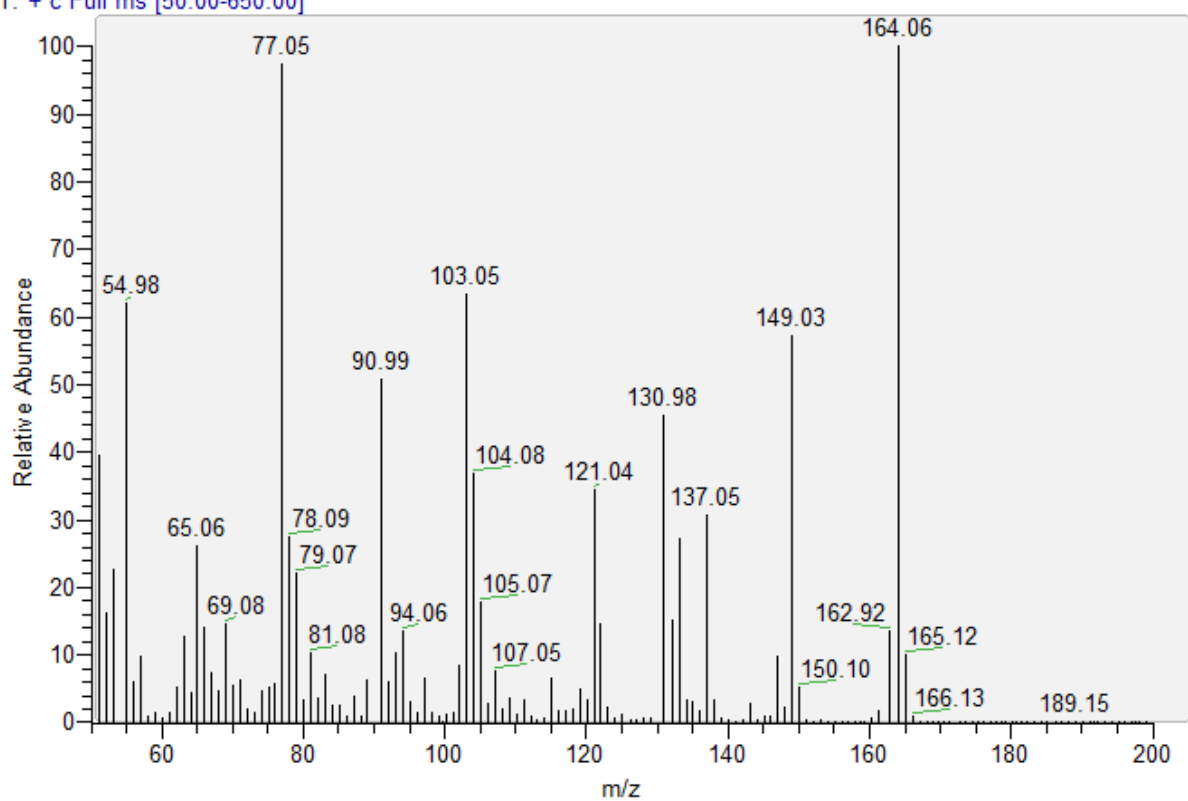

3072 #1645-1646 RT: 39.19-39.21 AV: 2 NL: 2.46E7  
T: + c Full ms [50.00-650.00]

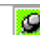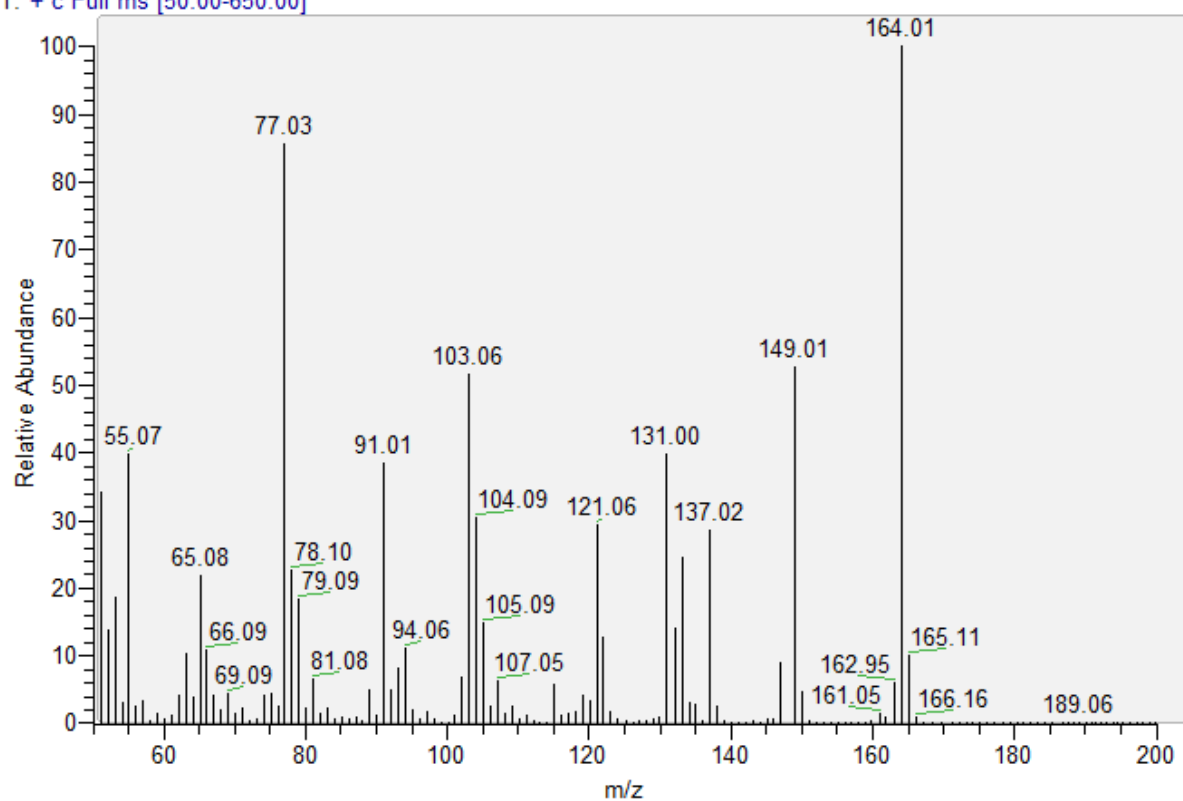

3070 #1648 RT: 39.19 AV: 1 NL: 2.19E6

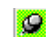

T: + c Full ms [50.00-650.00]

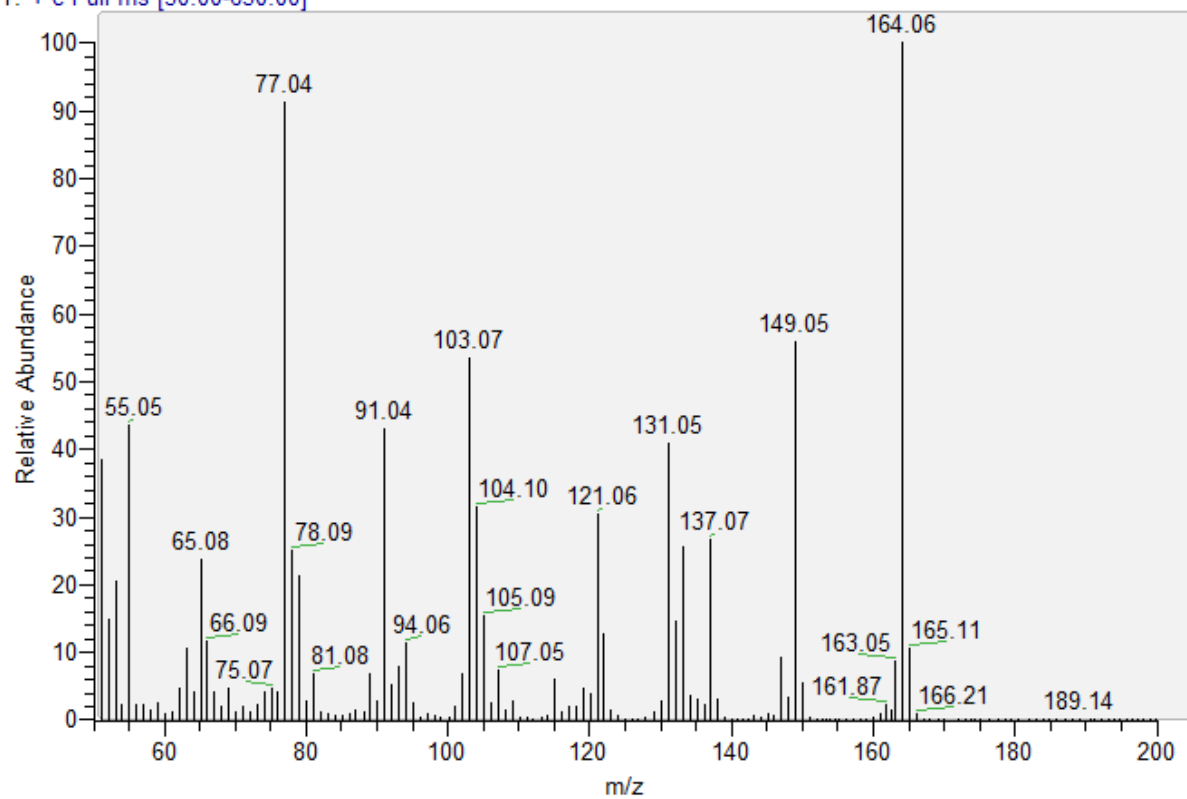

Farnesol

Reference:

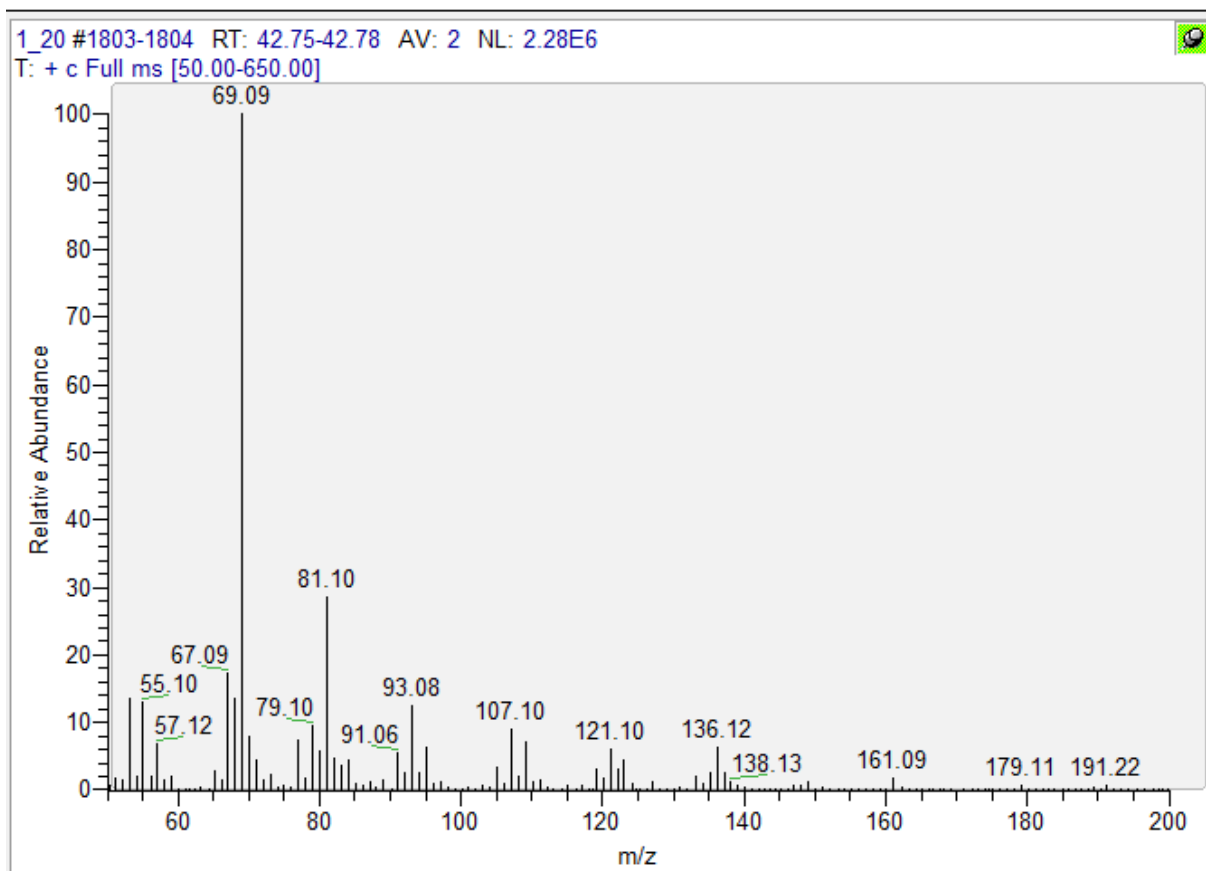

Samples:

3075 #1796-1797 RT: 42.78-42.81 AV: 2 NL: 5.68E7

T: + c Full ms [50.00-650.00]

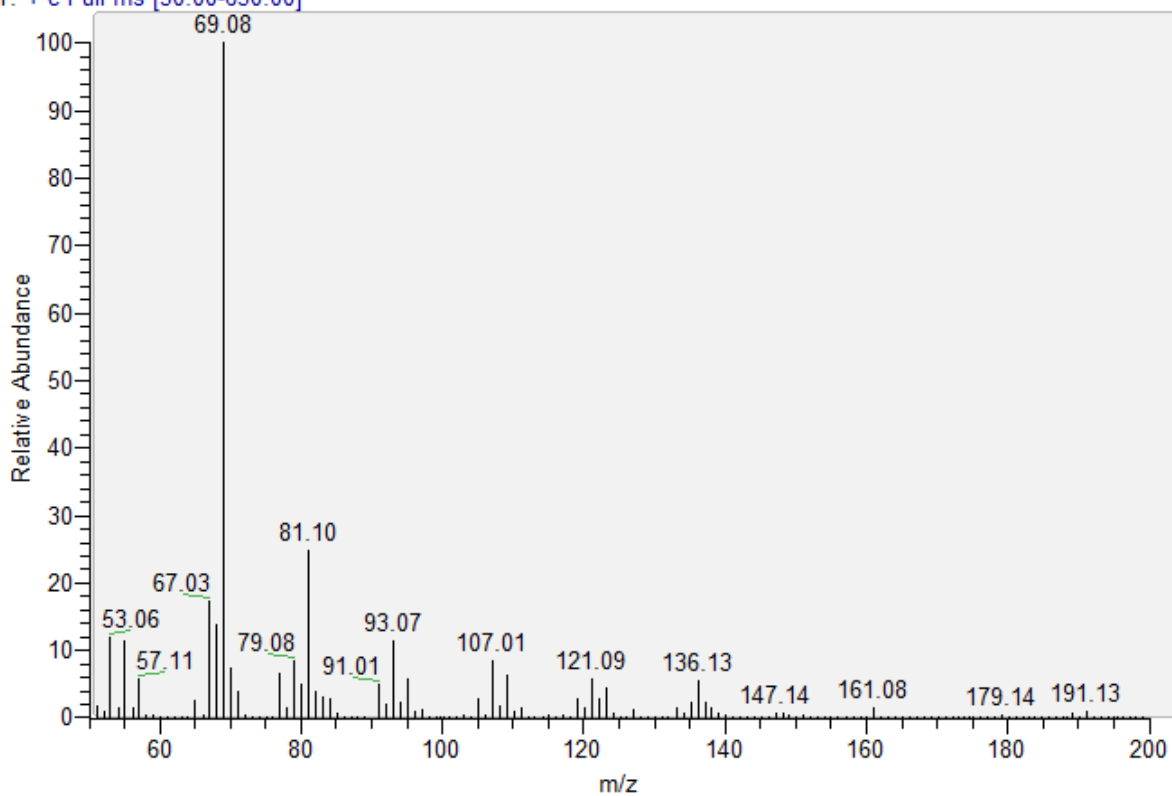

3074 #1798-1799 RT: 42.78-42.81 AV: 2 NL: 6.22E7

T: + c Full ms [50.00-650.00]

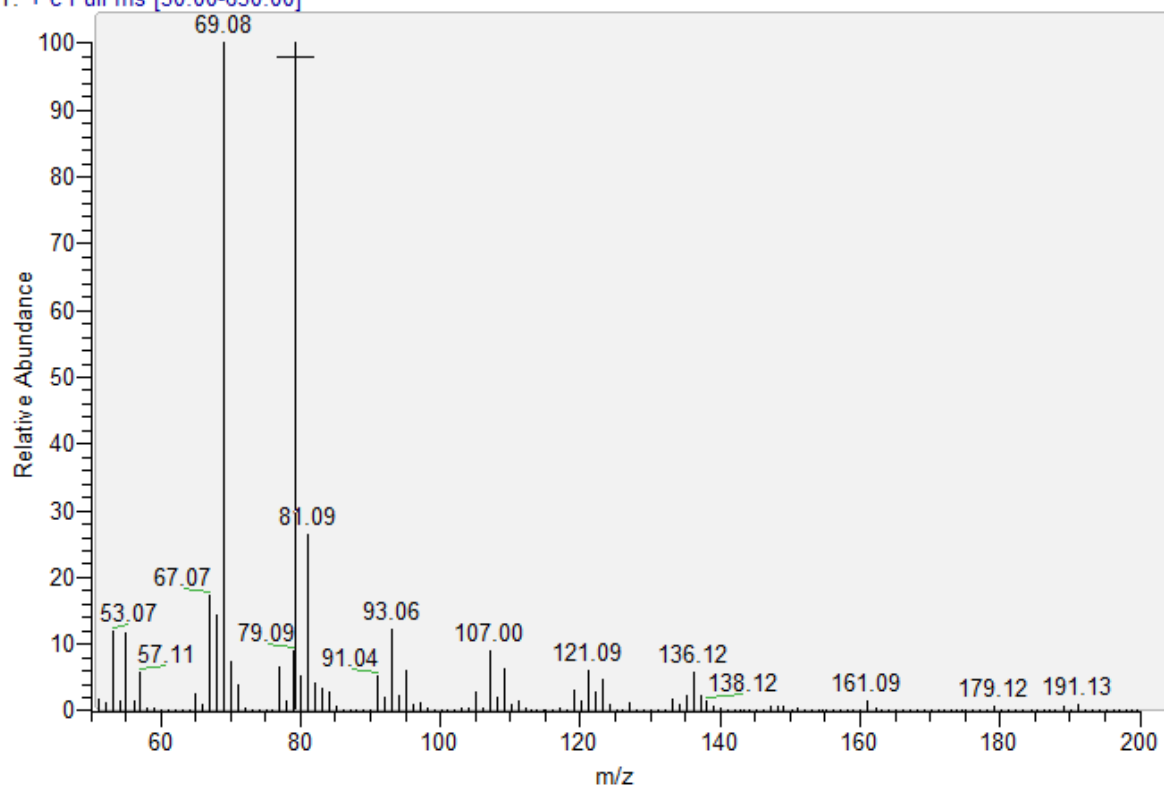

3073 #1797-1798 RT: 42.78-42.80 AV: 2 NL: 7.42E7  
T: + c Full ms [50.00-650.00]

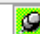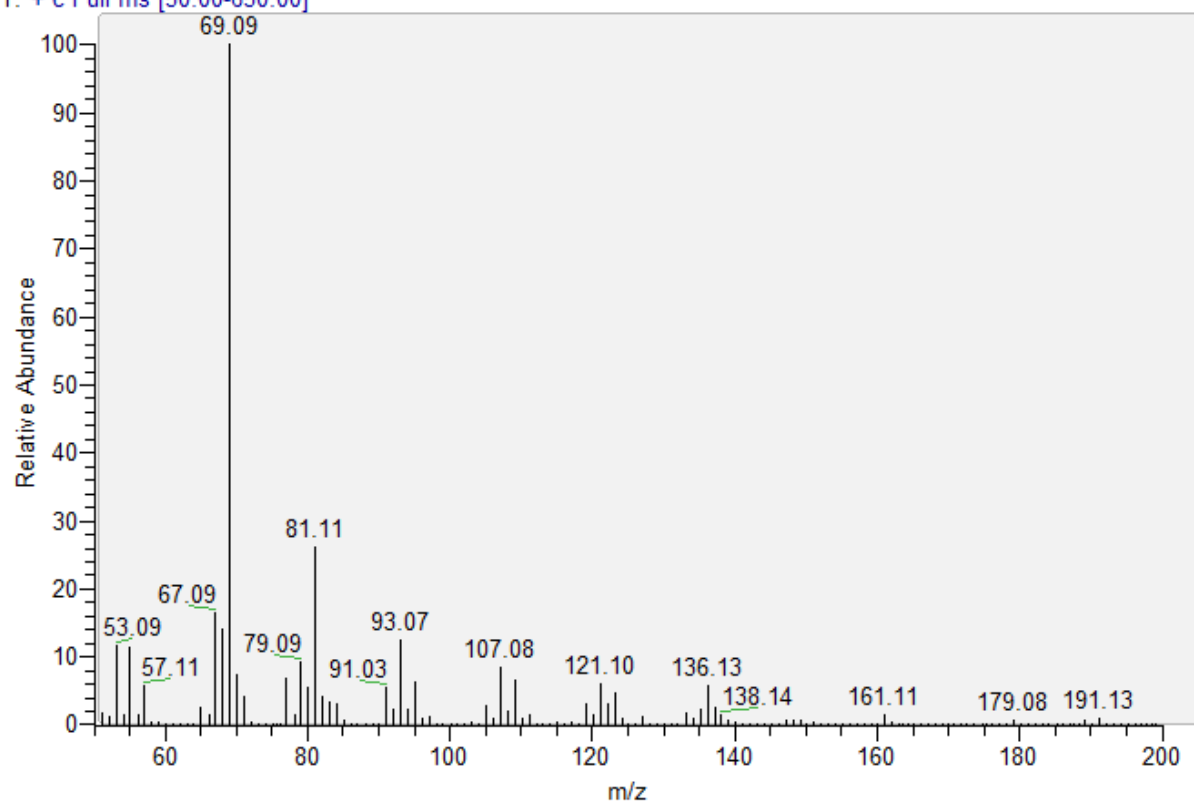

3072 #1796 RT: 42.79 AV: 1 NL: 1.18E8  
T: + c Full ms [50.00-650.00]

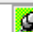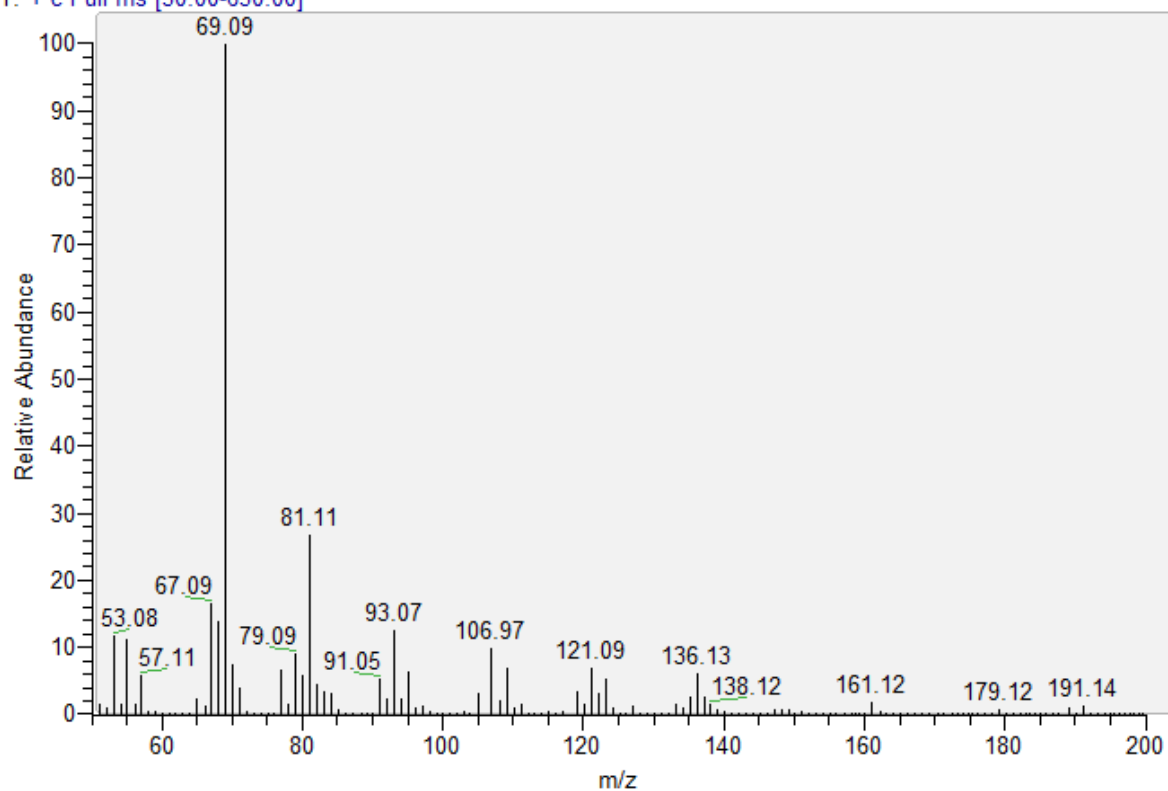



3070 #1798-1799 RT: 42.76-42.78 AV: 2 NL: 7.29E6  
T: + c Full ms [50.00-650.00]

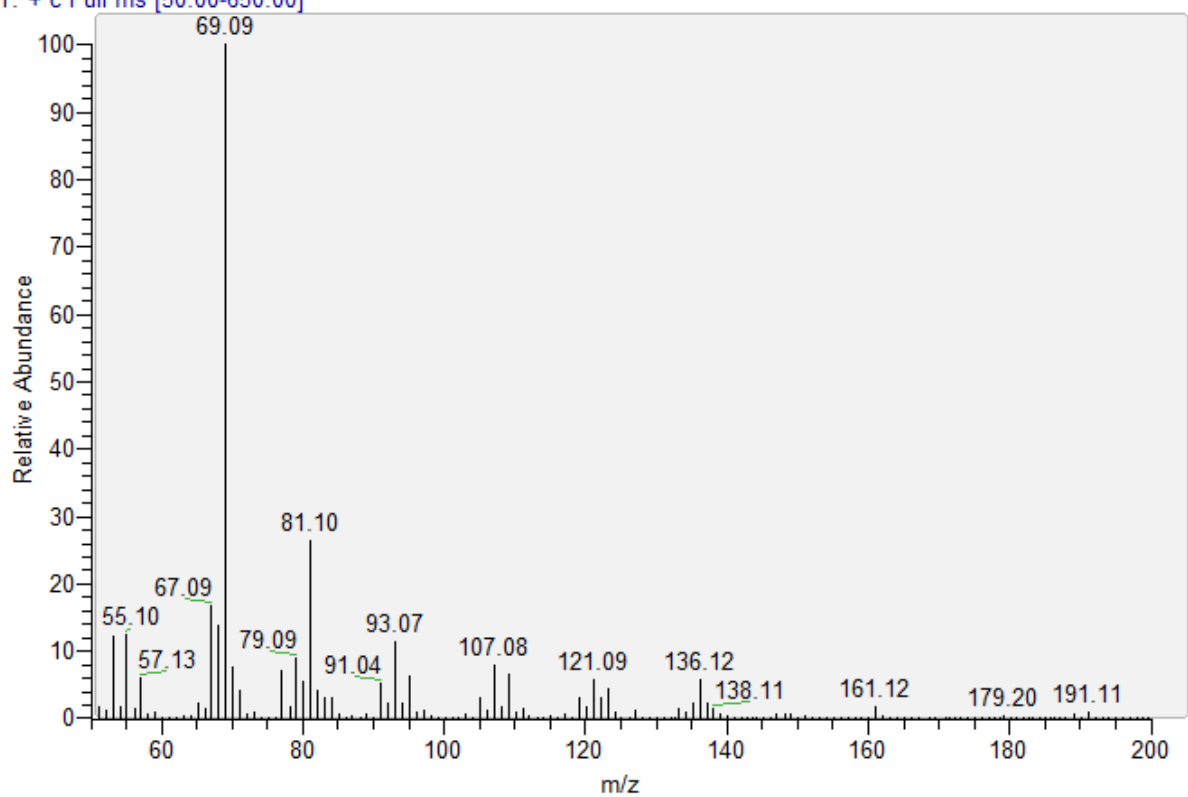

3021 #1798-1799 RT: 42.78-42.80 AV: 2 NL: 1.03E8  
T: + c Full ms [50.00-650.00]

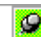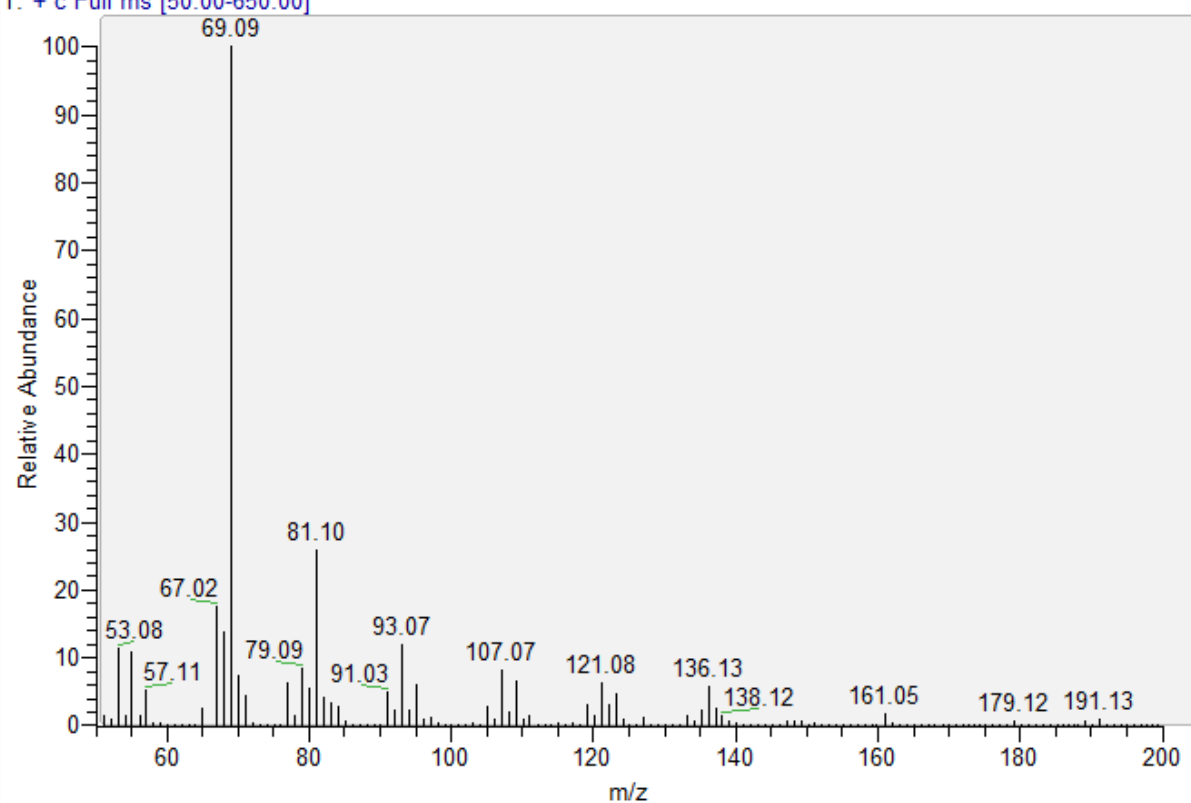

3057 #1802-1803 RT: 42.77-42.80 AV: 2 NL: 7.72E5  
T: + c Full ms [50.00-650.00]

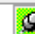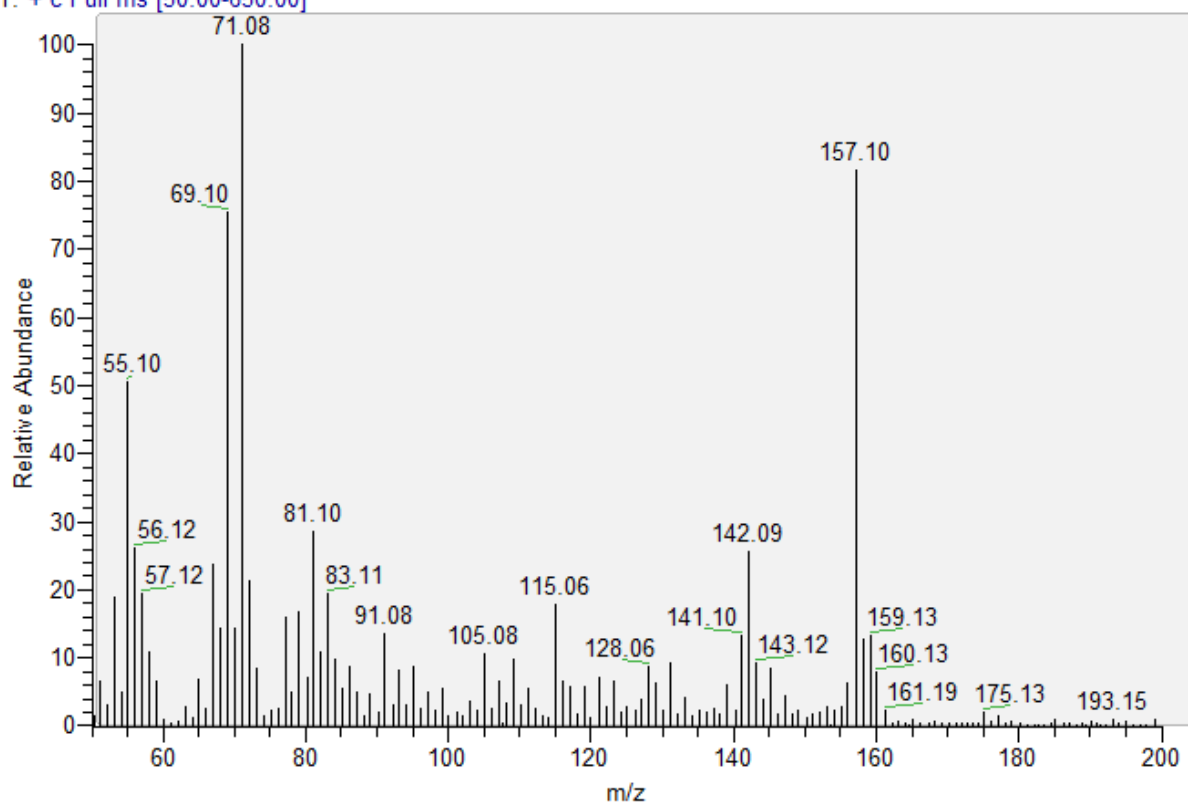

3058 #1794-1795 RT: 42.79-42.81 AV: 2 NL: 1.94E6  
T: + c Full ms [50.00-650.00]

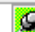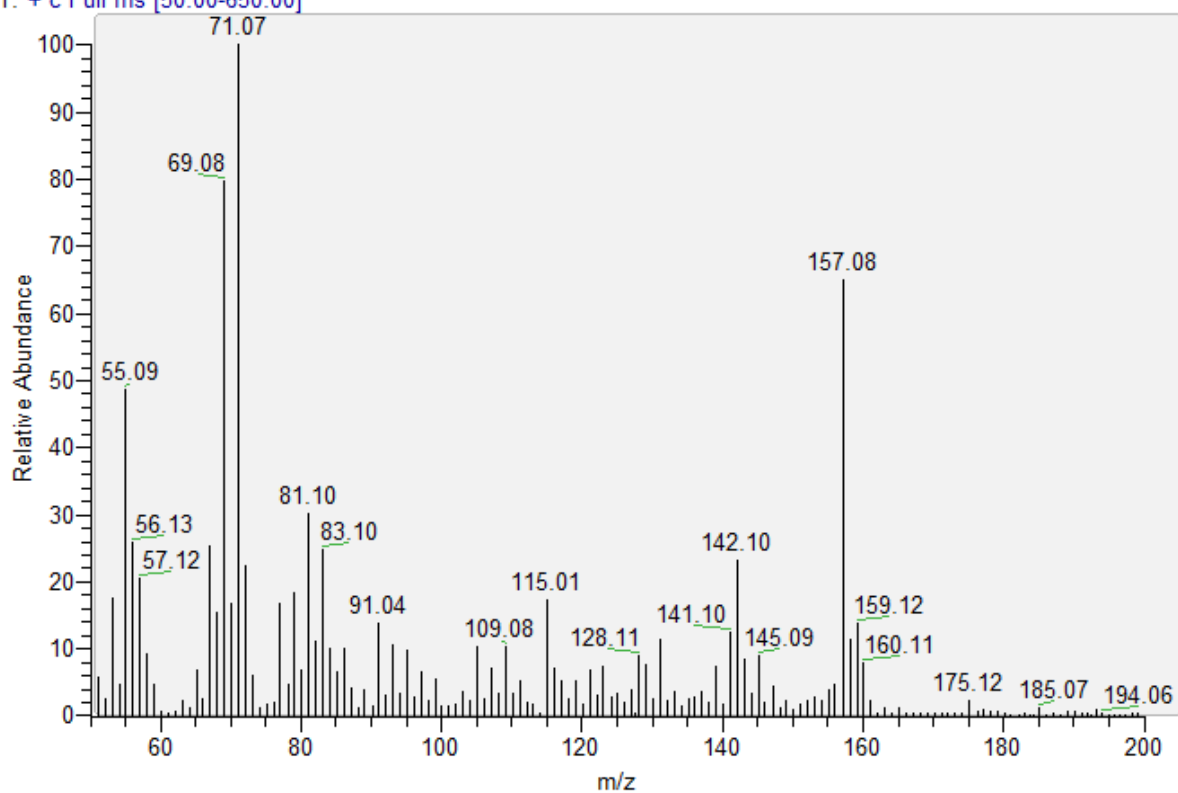

3053 #1796-1797 RT: 42.75-42.77 AV: 2 NL: 7.47E6  
T: + c Full ms [50.00-650.00]

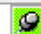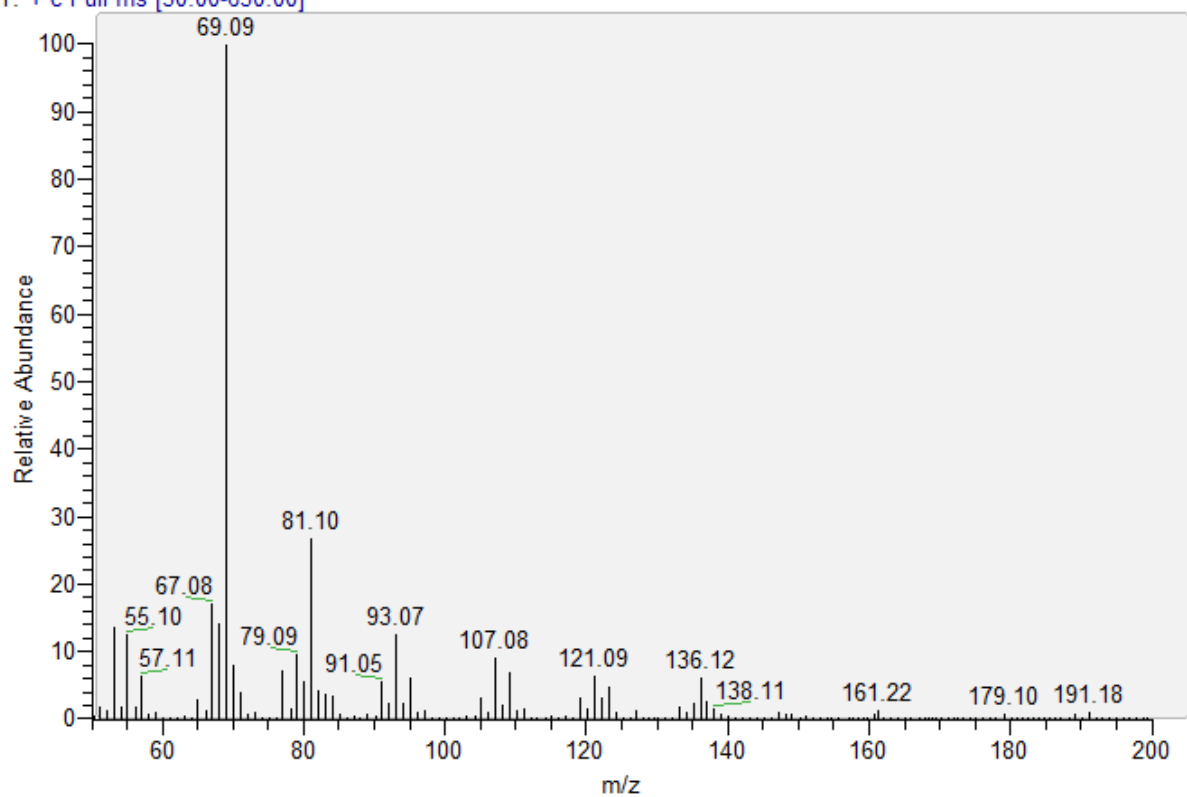

3018 #1802 RT: 42.79 AV: 1 NL: 1.43E8  
T: + c Full ms [50.00-650.00]

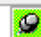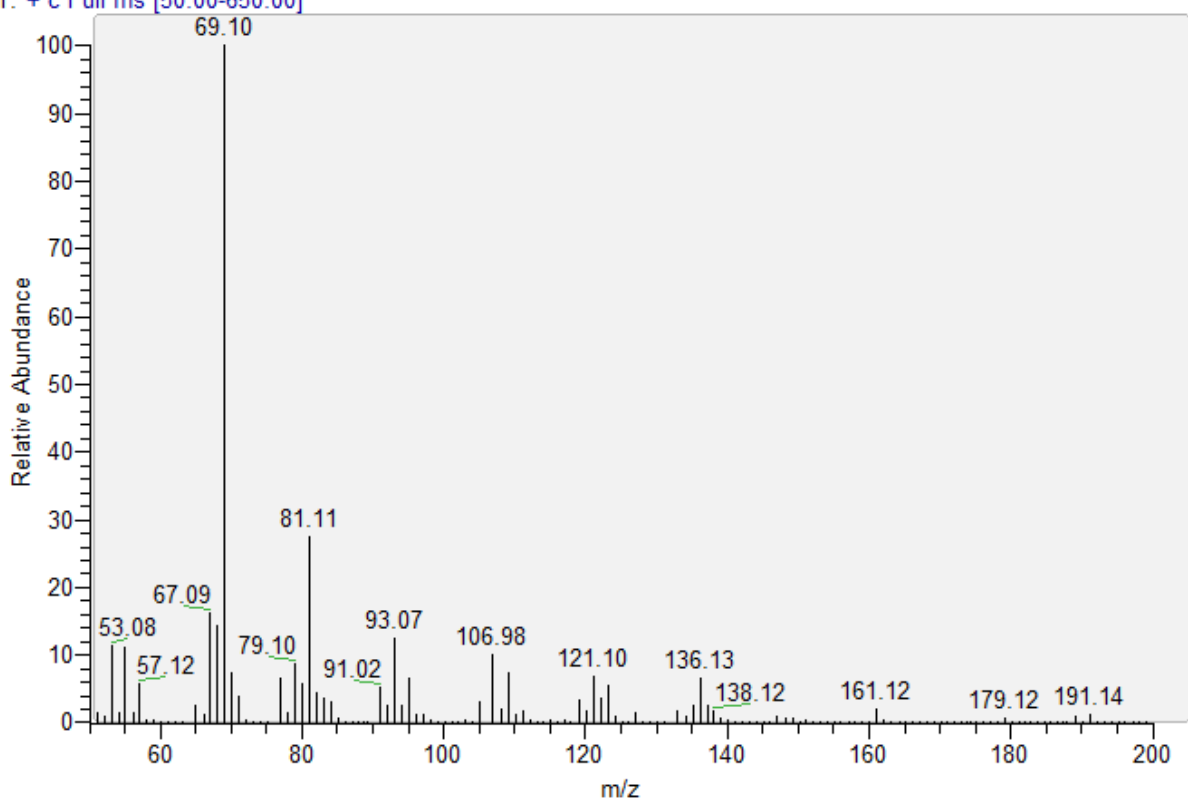

Supplement: s1 [file s1]
